# Supplementary material for: Influenza A virus infects pulmonary microvascular endothelial cells leading to microvascular leakage and release of pro-inflammatory cytokines
Source: PeerJ. 2021 Aug 3;9:e11892. doi: 10.7717/peerj.11892 (PMC8344683; doi:10.7717/peerj.11892)
Supplement: Supplemental Information 4 [file peerj-09-11892-s004.xls]

## Sheet: Sheet1
Category	Term	Count	%	PValue	Genes	List Total	Pop Hits	Pop Total	Fold Enrichment	Bonferroni	Benjamini	FDR
GOTERM_CC_FAT	GO:0005615~extracellular space	51	47.6636	1.20334e-23	APP, CSF2, CXCL8, IFNA1, HMGB1, FGF2, TNF, ICAM1, PLAU, B2M, CAMP, MBL2, IL10, SFTPB, MMP2, IL18, MIF, ACTN4, F2, MMP9, IL1A, IFNG, IL1B, EZR, CRP, CALCA, EGFR, KNG1, HSPD1, INS, TTR, CCL5, CCL4, CCL2, ELANE, TGFB1, IFNB1, FN1, DEFA1, IL2, SOD1, VEGFA, CXCL10, IL3, CXCL11, IL6, IL5, ALB, IL9, GHRL, HSPA1A	104	1444	14527	4.93339	4.28387e-21	4.28387e-21	3.88677e-21
GOTERM_CC_FAT	GO:0044421~extracellular region part	68	63.5514	4.00525e-16	IFITM3, APP, CSF2, CXCL8, IFNA1, PIK3CB, HMGB1, AQP5, FGF2, TNF, ICAM1, AQP1, PLAU, B2M, GLUL, CAMP, MBL2, IL10, SFTPB, MMP2, PRKCD, IL18, MIF, ACTN4, F2, MMP9, RHOA, IL1A, IFNG, IL1B, CRYAA, EZR, CRP, CALCA, ABCB1, SRC, EGFR, KNG1, HSPD1, INS, PTPA, TTR, CCL5, NEU1, CCL4, CCL2, CD55, ELANE, TGFB1, IFNB1, FN1, DEFA1, MAPK14, SOD2, IL2, SOD1, VEGFA, CXCL10, IL3, CXCL11, IL6, IL5, CD209, ALB, IL9, …	104	3878	14527	2.44931	1.58096e-13	7.12934e-14	6.46848e-14
GOTERM_CC_FAT	GO:0005576~extracellular region	70	65.4206	2.21568e-13	IFITM3, APP, CSF2, CXCL8, IFNA1, PIK3CB, HMGB1, AQP5, FGF2, TNF, ICAM1, AQP1, PLAU, B2M, GLUL, CAMP, MBL2, IL10, SFTPB, MMP2, PRKCD, IL18, MIF, ACTN4, F2, MMP9, RHOA, IL1A, IFNG, IL1B, CRYAA, EZR, CRP, CALCA, ABCB1, SRC, AGER, EGFR, KNG1, HSPD1, INS, PTPA, TTR, CCL5, NEU1, CCL4, CCL2, CD55, ELANE, TGFB1, IFNB1, FN1, ISG15, DEFA1, MAPK14, SOD2, IL2, SOD1, VEGFA, CXCL10, IL3, CXCL11, IL6, IL5, CD20…	104	4623	14527	2.11503	7.88898e-11	2.62927e-11	2.38555e-11
GOTERM_CC_FAT	GO:0009986~cell surface	28	26.1682	2.04977e-12	APP, ABCB1, HMGB1, TNF, EGFR, HSPD1, ICAM1, PLAU, CXCR3, MRC1, CCR5, B2M, CD55, ELANE, MBL2, TGFB1, MIF, RHOA, VEGFA, CXCL10, IL6, IFNG, CD209, IL2RA, ITGA5, TLR4, TLR3, TLR2	104	765	14527	5.11257	7.2973e-10	1.8243e-10	1.65519e-10
GOTERM_CC_FAT	GO:0031983~vesicle lumen	11	10.2804	3.72897e-09	APP, TGFB1, ALB, FN1, GHRL, ACTN4, DEFA1, KNG1, EGFR, INS, VEGFA	104	106	14527	14.4954	1.32751e-06	2.65503e-07	2.40892e-07
GOTERM_CC_FAT	GO:0034774~secretory granule lumen	10	9.34579	9.29077e-09	APP, TGFB1, ALB, FN1, GHRL, ACTN4, DEFA1, KNG1, INS, VEGFA	104	86	14527	16.2422	3.30751e-06	5.51253e-07	5.00153e-07
GOTERM_CC_FAT	GO:0030141~secretory granule	16	14.9533	3.20171e-08	SFTPB, APP, TGFB1, FN1, DEFA1, ACTN4, KNG1, HSPD1, INS, SOD1, VEGFA, IL1B, ALB, GHRL, ELANE, CAMP	104	358	14527	6.2428	1.1398e-05	1.6283e-06	1.47736e-06
GOTERM_CC_FAT	GO:0060205~cytoplasmic membrane-bounded vesicle lumen	10	9.34579	5.43318e-08	APP, TGFB1, ALB, FN1, GHRL, ACTN4, DEFA1, KNG1, INS, VEGFA	104	105	14527	13.3031	1.93419e-05	2.41776e-06	2.19365e-06
GOTERM_CC_FAT	GO:0098552~side of membrane	16	14.9533	5.21198e-07	SRC, TNF, RHOA, PTK2, ICAM1, CXCL10, IL6, IFNG, IL2RA, CXCR3, FYN, ITGA5, EZR, CCR5, B2M, TLR4	104	444	14527	5.03361	0.000185529	2.06163e-05	1.87052e-05
GOTERM_CC_FAT	GO:0099503~secretory vesicle	16	14.9533	9.84597e-07	SFTPB, APP, TGFB1, FN1, DEFA1, ACTN4, KNG1, HSPD1, INS, SOD1, VEGFA, IL1B, ALB, GHRL, ELANE, CAMP	104	467	14527	4.7857	0.000350455	3.50516e-05	3.18025e-05
GOTERM_CC_FAT	GO:0031093~platelet alpha granule lumen	7	6.54206	2.40018e-06	APP, TGFB1, ALB, FN1, ACTN4, KNG1, VEGFA	104	55	14527	17.7778	0.000854101	7.76786e-05	7.0478e-05
GOTERM_CC_FAT	GO:0045121~membrane raft	12	11.215	4.19445e-06	APP, SRC, CASP3, FYN, EZR, PTGS2, TNF, CD55, EGFR, HSPD1, ICAM1, TLR2	104	277	14527	6.05124	0.00149211	0.000118898	0.000107876
GOTERM_CC_FAT	GO:0098857~membrane microdomain	12	11.215	4.34176e-06	APP, SRC, CASP3, FYN, EZR, PTGS2, TNF, CD55, EGFR, HSPD1, ICAM1, TLR2	104	278	14527	6.02947	0.00154448	0.000118898	0.000107876
GOTERM_CC_FAT	GO:0009897~external side of plasma membrane	11	10.2804	9.59022e-06	CXCL10, IL6, IFNG, CXCR3, IL2RA, ITGA5, CCR5, TNF, B2M, TLR4, ICAM1	104	246	14527	6.24597	0.00340831	0.000243866	0.00022126
GOTERM_CC_FAT	GO:0031091~platelet alpha granule	7	6.54206	1.48691e-05	APP, TGFB1, ALB, FN1, ACTN4, KNG1, VEGFA	104	75	14527	13.0371	0.00527947	0.000352894	0.000320182
GOTERM_CC_FAT	GO:0031988~membrane-bounded vesicle	46	42.9907	2.18898e-05	IFITM3, CRP, APP, ABCB1, SRC, AQP5, EGFR, KNG1, HSPD1, AQP1, INS, ICAM1, PTPA, TTR, PLAU, NEU1, CCL2, GLUL, B2M, CD55, ELANE, CAMP, SFTPB, TGFB1, PRKCD, SIGMAR1, IL18, FN1, DEFA1, ACTN4, MIF, MAPK14, F2, SOD2, MMP9, RHOA, SOD1, VEGFA, CD209, IL1B, ALB, BAX, GHRL, CRYAA, EZR, TLR2	104	3611	14527	1.7794	0.00776257	0.00047285	0.000429018
GOTERM_CC_FAT	GO:0016023~cytoplasmic, membrane-bounded vesicle	23	21.4953	2.25799e-05	SFTPB, APP, TGFB1, SIGMAR1, FN1, DEFA1, ACTN4, EGFR, KNG1, HSPD1, INS, SOD1, VEGFA, IL1B, ALB, NEU1, CCL2, GHRL, B2M, CD55, ELANE, CAMP, TLR2	104	1183	14527	2.71572	0.00800632	0.00047285	0.000429018
GOTERM_CC_FAT	GO:0005773~vacuole	23	21.4953	3.27628e-05	IFITM3, SFTPB, APP, SRC, DEFA1, HMGB1, TNF, RHOA, EGFR, PIK3CG, HSPD1, INS, SOD1, IL1B, MRC1, NEU1, F2RL1, FYN, EZR, CCR5, B2M, TLR4, TLR3	104	1212	14527	2.65074	0.011596	0.000647976	0.000587911
GOTERM_CC_FAT	GO:0098589~membrane region	12	11.215	4.14783e-05	APP, SRC, CASP3, FYN, EZR, PTGS2, TNF, CD55, EGFR, HSPD1, ICAM1, TLR2	104	354	14527	4.73501	0.0146581	0.000777173	0.000705131
GOTERM_CC_FAT	GO:0005768~endosome	18	16.8224	5.21371e-05	IFITM3, SFTPB, APP, SRC, HMGB1, TNF, RHOA, EGFR, HSPD1, INS, MRC1, F2RL1, FYN, EZR, CCR5, B2M, TLR4, TLR3	104	811	14527	3.10023	0.0183901	0.000928041	0.000842015
GOTERM_CC_FAT	GO:0070062~extracellular exosome	37	34.5794	0.000138052	IFITM3, CRP, APP, ABCB1, SRC, AQP5, KNG1, HSPD1, AQP1, ICAM1, PTPA, TTR, PLAU, NEU1, GLUL, B2M, CD55, ELANE, CAMP, PRKCD, IL18, FN1, DEFA1, ACTN4, MIF, MAPK14, F2, SOD2, MMP9, RHOA, SOD1, CD209, IL1B, ALB, BAX, CRYAA, EZR	104	2811	14527	1.83858	0.0479616	0.00234031	0.00212337
GOTERM_CC_FAT	GO:1903561~extracellular vesicle	37	34.5794	0.000153177	IFITM3, CRP, APP, ABCB1, SRC, AQP5, KNG1, HSPD1, AQP1, ICAM1, PTPA, TTR, PLAU, NEU1, GLUL, B2M, CD55, ELANE, CAMP, PRKCD, IL18, FN1, DEFA1, ACTN4, MIF, MAPK14, F2, SOD2, MMP9, RHOA, SOD1, CD209, IL1B, ALB, BAX, CRYAA, EZR	104	2825	14527	1.82947	0.053075	0.0023885	0.0021671
GOTERM_CC_FAT	GO:0043230~extracellular organelle	37	34.5794	0.000154314	IFITM3, CRP, APP, ABCB1, SRC, AQP5, KNG1, HSPD1, AQP1, ICAM1, PTPA, TTR, PLAU, NEU1, GLUL, B2M, CD55, ELANE, CAMP, PRKCD, IL18, FN1, DEFA1, ACTN4, MIF, MAPK14, F2, SOD2, MMP9, RHOA, SOD1, CD209, IL1B, ALB, BAX, CRYAA, EZR	104	2826	14527	1.82883	0.0534579	0.0023885	0.0021671
GOTERM_CC_FAT	GO:0005775~vacuolar lumen	7	6.54206	0.000173392	SFTPB, APP, NEU1, DEFA1, B2M, EGFR, INS	104	116	14527	8.42913	0.0598661	0.00257198	0.00233357
GOTERM_CC_FAT	GO:0043209~myelin sheath	8	7.47664	0.000236403	ALB, BCL2, MIF, EZR, SOD2, GLUL, HSPD1, SOD1	104	174	14527	6.42219	0.0807245	0.00336638	0.00305433
GOTERM_CC_FAT	GO:0031904~endosome lumen	4	3.73832	0.00079937	SFTPB, APP, B2M, INS	104	26	14527	21.4896	0.247752	0.0109452	0.00993063
GOTERM_CC_FAT	GO:0005783~endoplasmic reticulum	24	22.4299	0.00114824	SFTPB, APP, XBP1, IFNGR1, SIGMAR1, PRKCD, AQP5, F2, PTGS2, RHOA, EGFR, HSPD1, INS, SGPL1, ALB, BCL2, BAX, CCL2, GHRL, ITGA5, GLUL, TP53, B2M, TLR3	104	1660	14527	2.01951	0.335691	0.0151398	0.0137364
GOTERM_CC_FAT	GO:0044433~cytoplasmic vesicle part	13	12.1495	0.00134854	APP, TGFB1, FN1, DEFA1, ACTN4, EGFR, KNG1, INS, VEGFA, ALB, GHRL, B2M, TLR2	104	615	14527	2.95264	0.381467	0.0171457	0.0155564
GOTERM_CC_FAT	GO:0005925~focal adhesion	10	9.34579	0.0018279	PLAU, ACTN4, ITGA5, EZR, B2M, PTK2, RHOA, EGFR, ICAM1, HSPA1A	104	391	14527	3.57245	0.478647	0.0224391	0.020359
GOTERM_CC_FAT	GO:0005924~cell-substrate adherens junction	10	9.34579	0.00192555	PLAU, ACTN4, ITGA5, EZR, B2M, PTK2, RHOA, EGFR, ICAM1, HSPA1A	104	394	14527	3.54525	0.496493	0.0228499	0.0207318
GOTERM_CC_FAT	GO:0030055~cell-substrate junction	10	9.34579	0.00209757	PLAU, ACTN4, ITGA5, EZR, B2M, PTK2, RHOA, EGFR, ICAM1, HSPA1A	104	399	14527	3.50082	0.52646	0.0240882	0.0218553
GOTERM_CC_FAT	GO:0043235~receptor complex	9	8.41121	0.00229779	APP, IL6, PTPRB, ITGA5, B2M, TLR4, EGFR, HSPD1, TLR2	104	328	14527	3.83276	0.559108	0.0255629	0.0231933
GOTERM_CC_FAT	GO:0045177~apical part of cell	9	8.41121	0.00412102	APP, ABCB1, FN1, AQP5, EZR, PTK2, CD55, EGFR, AQP1	104	361	14527	3.48239	0.770101	0.044457	0.040336
GOTERM_CC_FAT	GO:0072562~blood microparticle	6	5.60748	0.00477436	TGFB1, ALB, FN1, F2, KNG1, HSPA1A	104	154	14527	5.44218	0.817999	0.0486747	0.0441627
GOTERM_CC_FAT	GO:0016324~apical plasma membrane	8	7.47664	0.00481811	ABCB1, FN1, AQP5, EZR, PTK2, CD55, EGFR, AQP1	104	293	14527	3.81386	0.820825	0.0486747	0.0441627
GOTERM_CC_FAT	GO:0097386~glial cell projection	3	2.80374	0.00492216	APP, EZR, GLUL	104	15	14527	27.9365	0.827372	0.0486747	0.0441627
GOTERM_CC_FAT	GO:0043005~neuron projection	15	14.0187	0.00813424	APP, CALCA, TGFB1, IFNGR1, SRC, SIGMAR1, HMGB1, ACTN4, PTGS2, HIF1A, SOD1, IFNG, CCL2, GHRL, GLUL	104	966	14527	2.16899	0.945395	0.0782646	0.0710097
GOTERM_CC_FAT	GO:0005887~integral component of plasma membrane	21	19.6262	0.0101982	APP, IFNGR1, SIGMAR1, AQP5, AGER, TNF, AQP1, ICAM1, CLEC4A, IL6, PTPRB, CXCR3, MRC1, F2RL1, ITGA5, CCR5, TLR5, TLR4, CD55, TLR3, TLR2	104	1635	14527	1.79409	0.973988	0.0955408	0.0866844
GOTERM_CC_FAT	GO:0019898~extrinsic component of membrane	7	6.54206	0.0112264	SRC, FYN, PIK3CB, EZR, PTK2, RHOA, PIK3CG	104	264	14527	3.70371	0.982033	0.102477	0.0929777
GOTERM_CC_FAT	GO:0044440~endosomal part	9	8.41121	0.0130762	IFITM3, SFTPB, APP, MRC1, B2M, TLR4, EGFR, TLR3, INS	104	441	14527	2.85067	0.990775	0.116378	0.10559
GOTERM_CC_FAT	GO:0005791~rough endoplasmic reticulum	4	3.73832	0.0139647	APP, CCL2, GLUL, HSPD1	104	71	14527	7.86945	0.993305	0.121254	0.110014
GOTERM_CC_FAT	GO:0048471~perinuclear region of cytoplasm	11	10.2804	0.0151461	APP, AIFM1, NOS2, SRC, PRKCD, CCL2, ACTN4, EZR, TLR4, EGFR, HSPA1A	104	639	14527	2.40455	0.995631	0.126982	0.115212
GOTERM_CC_FAT	GO:0031226~intrinsic component of plasma membrane	21	19.6262	0.0153378	APP, IFNGR1, SIGMAR1, AQP5, AGER, TNF, AQP1, ICAM1, CLEC4A, IL6, PTPRB, CXCR3, MRC1, F2RL1, ITGA5, CCR5, TLR5, TLR4, CD55, TLR3, TLR2	104	1701	14527	1.72448	0.995924	0.126982	0.115212
GOTERM_CC_FAT	GO:0033267~axon part	6	5.60748	0.0194447	APP, CALCA, CCL2, GLUL, HIF1A, SOD1	104	218	14527	3.84448	0.999079	0.155081	0.140706
GOTERM_CC_FAT	GO:0099568~cytoplasmic region	7	6.54206	0.019603	NOS2, ACTN4, EZR, HIF1A, PTK2, RHOA, SOD1	104	299	14527	3.27016	0.999131	0.155081	0.140706
GOTERM_CC_FAT	GO:0005912~adherens junction	11	10.2804	0.0252654	PLAU, SRC, ACTN4, ITGA5, EZR, B2M, PTK2, RHOA, EGFR, ICAM1, HSPA1A	104	694	14527	2.21399	0.999889	0.195532	0.177407
GOTERM_CC_FAT	GO:0009898~cytoplasmic side of plasma membrane	5	4.6729	0.0275851	SRC, FYN, EZR, PTK2, RHOA	104	161	14527	4.33797	0.999953	0.206425	0.18729
GOTERM_CC_FAT	GO:0005829~cytosol	34	31.7757	0.0278326	APP, SRC, PIK3CB, HIF1A, RELA, PIK3CG, HSPD1, AIFM1, CASP3, FYN, PLCG1, GLUL, XBP1, JUN, RIPK3, NOS2, PRKCD, IL18, PTPN11, ISG15, MAPK14, RHOA, PTK2, NFKB1, SOD1, IL1A, IRF3, IL1B, BCL2, BAX, EZR, TP53, HSPA1A, NFE2L2	104	3399	14527	1.39724	0.999957	0.206425	0.18729
GOTERM_CC_FAT	GO:0030424~axon	8	7.47664	0.0290765	APP, CALCA, TGFB1, CCL2, GHRL, GLUL, HIF1A, SOD1	104	418	14527	2.67335	0.999973	0.207943	0.188667
GOTERM_CC_FAT	GO:0070161~anchoring junction	11	10.2804	0.0292055	PLAU, SRC, ACTN4, ITGA5, EZR, B2M, PTK2, RHOA, EGFR, ICAM1, HSPA1A	104	711	14527	2.16105	0.999974	0.207943	0.188667
GOTERM_CC_FAT	GO:0005796~Golgi lumen	4	3.73832	0.0307707	TGFB1, DEFA1, F2, INS	104	96	14527	5.82011	0.999985	0.211883	0.192243
GOTERM_CC_FAT	GO:0044437~vacuolar part	11	10.2804	0.0309493	IFITM3, SFTPB, APP, NEU1, MRC1, DEFA1, B2M, TLR4, EGFR, TLR3, INS	104	718	14527	2.13999	0.999986	0.211883	0.192243
GOTERM_CC_FAT	GO:0031234~extrinsic component of cytoplasmic side of plasma membrane	4	3.73832	0.0349998	SRC, FYN, PTK2, RHOA	104	101	14527	5.53199	0.999997	0.235093	0.2133
GOTERM_CC_FAT	GO:0098562~cytoplasmic side of membrane	5	4.6729	0.0371535	SRC, FYN, EZR, PTK2, RHOA	104	177	14527	3.94584	0.999999	0.244938	0.222233
GOTERM_CC_FAT	GO:0005911~cell-cell junction	10	9.34579	0.0390814	APP, SRC, PRKCD, ACTN4, PLCG1, ITGA5, EZR, RHOA, EGFR, HSPA1A	104	644	14527	2.16899	0.999999	0.245696	0.222921
GOTERM_CC_FAT	GO:0000323~lytic vacuole	9	8.41121	0.0393389	IFITM3, SFTPB, SRC, IL1B, NEU1, DEFA1, TLR3, PIK3CG, SOD1	104	544	14527	2.31093	0.999999	0.245696	0.222921
GOTERM_CC_FAT	GO:0005764~lysosome	9	8.41121	0.0393389	IFITM3, SFTPB, SRC, IL1B, NEU1, DEFA1, TLR3, PIK3CG, SOD1	104	544	14527	2.31093	0.999999	0.245696	0.222921
GOTERM_CC_FAT	GO:0031252~cell leading edge	7	6.54206	0.0405033	APP, SRC, PLCG1, ITGA5, EZR, PTK2, RHOA	104	355	14527	2.75431	1	0.248606	0.225561
GOTERM_CC_FAT	GO:0046696~lipopolysaccharide receptor complex	2	1.86916	0.0418016	TLR4, HSPD1	104	6	14527	46.5609	1	0.252226	0.228846
GOTERM_CC_FAT	GO:0005793~endoplasmic reticulum-Golgi intermediate compartment	4	3.73832	0.0443095	FN1, HMGB1, CD55, INS	104	111	14527	5.03361	1	0.262903	0.238533
GOTERM_CC_FAT	GO:0043679~axon terminus	4	3.73832	0.0463055	APP, CALCA, CCL2, GLUL	104	113	14527	4.94452	1	0.270242	0.245191
GOTERM_CC_FAT	GO:0097458~neuron part	16	14.9533	0.048597	APP, CALCA, TGFB1, IFNGR1, SRC, SIGMAR1, HMGB1, ACTN4, PTGS2, HIF1A, SOD1, IFNG, CCL2, FYN, GHRL, GLUL	104	1333	14527	1.67661	1	0.274619	0.249162
GOTERM_CC_FAT	GO:0033256~I-kappaB/NF-kappaB complex	2	1.86916	0.0485982	RELA, NFKB1	104	7	14527	39.9093	1	0.274619	0.249162
GOTERM_CC_FAT	GO:0044297~cell body	8	7.47664	0.0543167	CALCA, TGFB1, IFNG, CCL2, EZR, GLUL, SOD1, TLR2	104	480	14527	2.32804	1	0.302136	0.274129
GOTERM_CC_FAT	GO:0005788~endoplasmic reticulum lumen	5	4.6729	0.0554912	GHRL, F2, PTGS2, B2M, INS	104	202	14527	3.45749	1	0.303921	0.275748
GOTERM_CC_FAT	GO:0044306~neuron projection terminus	4	3.73832	0.0591924	APP, CALCA, CCL2, GLUL	104	125	14527	4.46985	1	0.31928	0.289684
GOTERM_CC_FAT	GO:0030054~cell junction	16	14.9533	0.0618384	APP, SRC, SIGMAR1, PRKCD, ACTN4, RHOA, EGFR, PTK2, ICAM1, PLAU, NEU1, PLCG1, ITGA5, EZR, B2M, HSPA1A	104	1379	14527	1.62068	1	0.324843	0.294731
GOTERM_CC_FAT	GO:0097449~astrocyte projection	2	1.86916	0.0620487	APP, EZR	104	9	14527	31.0406	1	0.324843	0.294731
GOTERM_CC_FAT	GO:0098590~plasma membrane region	12	11.215	0.0673559	ABCB1, SRC, SIGMAR1, FN1, AQP5, ITGA5, EZR, PTGS2, PTK2, CD55, EGFR, AQP1	104	936	14527	1.7908	1	0.347517	0.315304
GOTERM_CC_FAT	GO:0005769~early endosome	6	5.60748	0.0709984	F2RL1, HMGB1, B2M, EGFR, TLR3, HSPD1	104	312	14527	2.68621	1	0.361078	0.327607
GOTERM_CC_FAT	GO:0044432~endoplasmic reticulum part	14	13.0841	0.0724584	SFTPB, XBP1, SIGMAR1, F2, PTGS2, RHOA, EGFR, INS, SGPL1, BCL2, BAX, GHRL, B2M, TLR3	104	1177	14527	1.66148	1	0.363313	0.329635
GOTERM_CC_FAT	GO:0019897~extrinsic component of plasma membrane	4	3.73832	0.0813039	SRC, FYN, PTK2, RHOA	104	143	14527	3.90721	1	0.402003	0.364738
GOTERM_CC_FAT	GO:0031012~extracellular matrix	8	7.47664	0.0824555	TGFB1, MMP2, FN1, DEFA1, MMP9, HSPD1, SOD1, VEGFA	104	530	14527	2.10842	1	0.402112	0.364837
GOTERM_CC_FAT	GO:0045202~synapse	10	9.34579	0.0872481	APP, CALCA, IFNGR1, SRC, SIGMAR1, CCL2, FYN, GHRL, ITGA5, EGFR	104	755	14527	1.8501	1	0.418518	0.379723
GOTERM_CC_FAT	GO:0005905~clathrin-coated pit	3	2.80374	0.0881709	APP, EGFR, HSPD1	104	70	14527	5.9864	1	0.418518	0.379723
GOTERM_CC_FAT	GO:0030135~coated vesicle	5	4.6729	0.0911127	SFTPB, APP, B2M, EGFR, HSPD1	104	240	14527	2.91006	1	0.426791	0.387229
GOTERM_CC_FAT	GO:0005902~microvillus	3	2.80374	0.0968661	TGFB1, AQP5, EZR	104	74	14527	5.66281	1	0.447849	0.406335
GOTERM_CC_FAT	GO:0005938~cell cortex	5	4.6729	0.098641	NOS2, ACTN4, EZR, PTK2, RHOA	104	247	14527	2.82758	1	0.450208	0.408475
