# Supplementary material for: Influenza A virus infects pulmonary microvascular endothelial cells leading to microvascular leakage and release of pro-inflammatory cytokines
Source: PeerJ. 2021 Aug 3;9:e11892. doi: 10.7717/peerj.11892 (PMC8344683; doi:10.7717/peerj.11892)
Supplement: Supplemental Information 5 [file peerj-09-11892-s005.xls]

## Sheet: Sheet1
Category	Term	Count	%	PValue	Genes	List Total	Pop Hits	Pop Total	Fold Enrichment	Bonferroni	Benjamini	FDR
GOTERM_BP_FAT	GO:0006952~defense response	70	65.4206	9.63146e-47	IFITM3, APP, CXCL8, IFNA1, HMGB1, TNF, PIK3CG, ICAM1, MRC1, CCR5, B2M, CAMP, MBL2, IL10, IFNGR1, MMP2, PRKCD, IL18, MIF, F2, CLEC4A, IL1A, IFNG, IRF3, IL1B, TLR5, TLR4, TLR3, TLR2, CRP, CALCA, SRC, PTGS2, HIF1A, AGER, EGFR, RELA, KNG1, HSPD1, INS, CXCR3, CCL5, CCL4, CCL2, FYN, CD55, ELANE, TGFB1, NOS2, IFNB1, FN1, PTPN11, ISG15, DEFA1, MAPK14, NFKB1, IL2, PTK2, CXCL10, CXCL11, IL6, IL5, CD209, IL…	105	1518	16650	7.31225	4.69341e-43	4.69341e-43	3.09748e-43
GOTERM_BP_FAT	GO:0009605~response to external stimulus	77	71.9626	2.48125e-46	IFITM3, APP, CSF2, CXCL8, IFNA1, PIK3CB, HMGB1, FGF2, TNF, PIK3CG, ICAM1, AQP1, AIFM1, PLAU, CASP3, MRC1, CCR5, B2M, GLUL, CAMP, MBL2, IL10, IFNGR1, PRKCD, IL18, MIF, F2, RHOA, IFNG, IRF3, IL1B, EZR, TLR5, TLR4, TP53, TLR3, TLR2, CRP, CALCA, SRC, PTGS2, AGER, EGFR, RELA, KNG1, HSPD1, INS, CXCR3, CCL5, CCL4, CCL2, FYN, CD55, ELANE, JUN, XBP1, TGFB1, NOS2, IFNB1, ISG15, DEFA1, MAPK14, SOD2, NFKB1, …	105	2073	16650	5.89001	1.20911e-42	6.04556e-43	3.98985e-43
GOTERM_BP_FAT	GO:0006955~immune response	68	63.5514	1.47837e-43	IFITM3, APP, CSF2, CXCL8, IFNA1, PIK3CB, HMGB1, TNF, PIK3CG, ICAM1, MRC1, CCR5, B2M, CAMP, MBL2, IL10, RIPK3, IFNGR1, MMP2, PRKCD, IL18, MIF, CLEC4A, IL1A, IFNG, IRF3, IL1B, EZR, TLR5, TLR4, TLR3, TLR2, CALCA, SRC, AGER, RELA, HSPD1, INS, CCL5, CCL4, CCL2, FYN, PLCG1, CD55, ELANE, JUN, XBP1, TGFB1, NOS2, IFNB1, PTPN11, ISG15, DEFA1, NFKB1, IL2, PTK2, CXCL10, IL3, CXCL11, IL6, IL5, CD209, IL2RA, I…	105	1551	16650	6.9522	7.20408e-40	2.40136e-40	1.58481e-40
GOTERM_BP_FAT	GO:0002684~positive regulation of immune system process	58	54.2056	3.33024e-43	CXCL8, PIK3CB, HMGB1, TNF, ICAM1, B2M, MBL2, IL10, MMP2, PRKCD, IL18, MIF, CLEC4A, IL1A, IFNG, IRF3, IL1B, EZR, TLR5, TLR4, TLR3, TLR2, CALCA, ABCB1, SRC, HIF1A, AGER, RELA, HSPD1, CCL5, CCL4, CCL2, FYN, PLCG1, CD55, ELANE, JUN, XBP1, TGFB1, IFNB1, PTPN11, ISG15, MAPK14, NFKB1, IL2, PTK2, VEGFA, CXCL10, IL3, CXCL11, IL6, IL5, CD209, IL2RA, BCL2, BAX, F2RL1, HSPA1A	105	960	16650	9.58036	1.62282e-39	4.05706e-40	2.67751e-40
GOTERM_BP_FAT	GO:0002682~regulation of immune system process	65	60.7477	5.13896e-43	CXCL8, IFNA1, PIK3CB, HMGB1, TNF, ICAM1, B2M, MBL2, IL10, RIPK3, IFNGR1, MMP2, PRKCD, IL18, MIF, CLEC4A, IL1A, IFNG, IRF3, IL1B, EZR, TLR5, TLR4, TLR3, TLR2, CALCA, ABCB1, SRC, HIF1A, AGER, RELA, HSPD1, INS, CXCR3, CCL5, CCL4, CCL2, FYN, PLCG1, CD55, ELANE, JUN, XBP1, TGFB1, IFNB1, PTPN11, ISG15, MAPK14, NFKB1, IL2, PTK2, SOD1, VEGFA, CXCL10, IL3, CXCL11, IL6, IL5, CD209, IL2RA, BCL2, BAX, F2RL1,…	105	1378	16650	7.47978	2.50421e-39	5.00843e-40	3.30538e-40
GOTERM_BP_FAT	GO:0006954~inflammatory response	50	46.729	1.0556e-41	CXCL8, HMGB1, TNF, PIK3CG, ICAM1, CCR5, CAMP, MBL2, IL10, PRKCD, IL18, MIF, F2, IL1A, IL1B, TLR5, TLR4, TLR3, TLR2, CRP, CALCA, PTGS2, HIF1A, AGER, EGFR, RELA, KNG1, HSPD1, INS, CXCR3, CCL5, CCL4, CCL2, CD55, ELANE, TGFB1, NOS2, FN1, MAPK14, NFKB1, IL2, CXCL10, CXCL11, IL6, IL5, IL2RA, IL9, F2RL1, GHRL, NFE2L2	105	637	16650	12.4467	5.14394e-38	8.57323e-39	5.65802e-39
GOTERM_BP_FAT	GO:0009607~response to biotic stimulus	55	51.4019	1.71657e-41	IFITM3, APP, CSF2, CXCL8, IFNA1, HMGB1, TNF, ICAM1, CASP3, MRC1, CCR5, B2M, CAMP, MBL2, IL10, IFNGR1, PRKCD, IL18, MIF, IFNG, IRF3, IL1B, TLR5, TLR4, TP53, TLR3, TLR2, CRP, CALCA, SRC, PTGS2, RELA, HSPD1, CCL5, CCL4, CCL2, FYN, CD55, ELANE, JUN, XBP1, TGFB1, NOS2, IFNB1, ISG15, DEFA1, MAPK14, SOD2, NFKB1, CXCL10, CXCL11, IL6, IL2RA, BCL2, F2RL1	105	873	16650	9.99018	8.36486e-38	1.19498e-38	7.88642e-39
GOTERM_BP_FAT	GO:0001816~cytokine production	49	45.7944	1.59409e-40	CSF2, HMGB1, TNF, PIK3CG, B2M, CAMP, IL10, RIPK3, PRKCD, IL18, MIF, IL1A, IFNG, IRF3, IL1B, EZR, TLR5, TLR4, TLR3, TLR2, CRP, CALCA, SRC, PTGS2, HIF1A, AGER, RELA, HSPD1, INS, CXCR3, CCL2, CD55, ELANE, XBP1, TGFB1, NOS2, IFNB1, FN1, ISG15, MAPK14, NFKB1, IL2, KLF2, SOD1, IL6, IL9, F2RL1, GHRL, HSPA1A	105	631	16650	12.3138	7.76802e-37	9.71003e-38	6.40826e-38
GOTERM_BP_FAT	GO:0045937~positive regulation of phosphate metabolic process	57	53.271	8.59251e-40	CSF2, IFNA1, PIK3CB, HMGB1, FGF2, TNF, PIK3CG, ICAM1, CAMP, RIPK3, PRKCD, IL18, MIF, F2, MMP9, RHOA, IL1A, IFNG, IL1B, ITGA5, TLR4, TP53, TLR3, CALCA, SRC, HIF1A, AGER, EGFR, INS, PTPA, CXCR3, CCL5, CCL4, CCL2, FYN, PLCG1, ELANE, JUN, XBP1, TGFB1, NOS2, IFNB1, PTPN11, MAPK14, IL2, PTK2, SOD1, VEGFA, CXCL10, IL3, CXCL11, IL6, IL5, BCL2, BAX, F2RL1, GHRL	105	1049	16650	8.61637	4.18713e-36	4.17495e-37	2.75531e-37
GOTERM_BP_FAT	GO:0010562~positive regulation of phosphorus metabolic process	57	53.271	8.59251e-40	CSF2, IFNA1, PIK3CB, HMGB1, FGF2, TNF, PIK3CG, ICAM1, CAMP, RIPK3, PRKCD, IL18, MIF, F2, MMP9, RHOA, IL1A, IFNG, IL1B, ITGA5, TLR4, TP53, TLR3, CALCA, SRC, HIF1A, AGER, EGFR, INS, PTPA, CXCR3, CCL5, CCL4, CCL2, FYN, PLCG1, ELANE, JUN, XBP1, TGFB1, NOS2, IFNB1, PTPN11, MAPK14, IL2, PTK2, SOD1, VEGFA, CXCL10, IL3, CXCL11, IL6, IL5, BCL2, BAX, F2RL1, GHRL	105	1049	16650	8.61637	4.18713e-36	4.17495e-37	2.75531e-37
GOTERM_BP_FAT	GO:0071310~cellular response to organic substance	73	68.2243	9.42427e-40	IFITM3, APP, CSF2, CXCL8, IFNA1, FGF2, TNF, PIK3CG, ICAM1, AQP1, AIFM1, CASP3, MRC1, CCR5, B2M, CAMP, IL10, IFNGR1, MMP2, PRKCD, IL18, MIF, RHOA, IL1A, IFNG, IRF3, IL1B, ITGA5, EZR, TLR5, TLR4, TLR3, TLR2, CALCA, SRC, PTGS2, HIF1A, EGFR, RELA, INS, CXCR3, CCL5, CCL4, CCL2, FYN, PLCG1, JUN, XBP1, TGFB1, NOS2, IFNB1, PTPN11, ISG15, DEFA1, MAPK14, SOD2, NFKB1, PTK2, KLF2, SOD1, VEGFA, CXCL10, IL3, C…	105	2186	16650	5.29539	4.59245e-36	4.17495e-37	2.75531e-37
GOTERM_BP_FAT	GO:0048584~positive regulation of response to stimulus	71	66.3551	1.48162e-39	CSF2, CXCL8, PIK3CB, HMGB1, FGF2, TNF, PIK3CG, ICAM1, B2M, MBL2, IL10, RIPK3, MMP2, PRKCD, IL18, MIF, ACTN4, F2, MMP9, RHOA, CLEC4A, IL1A, IFNG, IRF3, IL1B, ITGA5, EZR, TLR5, TLR4, TP53, TLR3, TLR2, SRC, PTGS2, HIF1A, AGER, EGFR, RELA, HSPD1, INS, CXCR3, CCL5, CCL4, CCL2, FYN, PLCG1, CD55, ELANE, JUN, XBP1, TGFB1, IFNB1, PTPN11, MAPK14, NFKB1, IL2, PTK2, SOD1, VEGFA, CXCL10, IL3, CXCL11, IL6, IL5…	105	2030	16650	5.54609	7.21992e-36	6.0166e-37	3.97074e-37
GOTERM_BP_FAT	GO:1902533~positive regulation of intracellular signal transduction	54	50.4673	3.95823e-39	CSF2, PIK3CB, HMGB1, FGF2, TNF, PIK3CG, ICAM1, IL10, RIPK3, IL18, MIF, ACTN4, F2, RHOA, IL1A, IFNG, IRF3, IL1B, TLR4, TP53, TLR3, TLR2, SRC, PTGS2, AGER, EGFR, RELA, INS, CXCR3, CCL5, CCL4, CCL2, FYN, PLCG1, ELANE, JUN, XBP1, TGFB1, PTPN11, MAPK14, IL2, PTK2, SOD1, VEGFA, CXCL10, IL3, CXCL11, IL6, IL5, BCL2, BAX, F2RL1, GHRL, HSPA1A	105	915	16650	9.35831	1.92885e-35	1.48373e-36	9.79206e-37
GOTERM_BP_FAT	GO:0010033~response to organic substance	79	73.8318	6.20323e-39	IFITM3, APP, CSF2, CXCL8, IFNA1, HMGB1, FGF2, TNF, PIK3CG, ICAM1, AQP1, AIFM1, CASP3, MRC1, CCR5, B2M, GLUL, CAMP, IL10, IFNGR1, MMP2, PRKCD, IL18, MIF, RHOA, IL1A, IFNG, IRF3, IL1B, ITGA5, EZR, TLR5, TLR4, TLR3, TLR2, CALCA, SRC, PTGS2, HIF1A, EGFR, RELA, HSPD1, INS, CXCR3, CCL5, CCL4, CCL2, FYN, PLCG1, CD55, ELANE, JUN, XBP1, TGFB1, NOS2, IFNB1, PTPN11, ISG15, DEFA1, MAPK14, SOD2, NFKB1, IL2, P…	105	2822	16650	4.4391	3.02283e-35	2.15917e-36	1.42497e-36
GOTERM_BP_FAT	GO:0051707~response to other organism	52	48.5981	9.77273e-39	IFITM3, APP, CSF2, CXCL8, IFNA1, TNF, ICAM1, CASP3, MRC1, CCR5, B2M, CAMP, MBL2, IL10, IFNGR1, PRKCD, IL18, MIF, IFNG, IRF3, IL1B, TLR5, TLR4, TLR3, TLR2, CRP, CALCA, SRC, PTGS2, RELA, HSPD1, CCL5, CCL4, CCL2, FYN, ELANE, JUN, XBP1, TGFB1, NOS2, IFNB1, ISG15, DEFA1, MAPK14, SOD2, NFKB1, CXCL10, CXCL11, IL6, IL2RA, BCL2, F2RL1	105	829	16650	9.94658	4.76225e-35	2.97641e-36	1.96432e-36
GOTERM_BP_FAT	GO:0043207~response to external biotic stimulus	52	48.5981	9.77273e-39	IFITM3, APP, CSF2, CXCL8, IFNA1, TNF, ICAM1, CASP3, MRC1, CCR5, B2M, CAMP, MBL2, IL10, IFNGR1, PRKCD, IL18, MIF, IFNG, IRF3, IL1B, TLR5, TLR4, TLR3, TLR2, CRP, CALCA, SRC, PTGS2, RELA, HSPD1, CCL5, CCL4, CCL2, FYN, ELANE, JUN, XBP1, TGFB1, NOS2, IFNB1, ISG15, DEFA1, MAPK14, SOD2, NFKB1, CXCL10, CXCL11, IL6, IL2RA, BCL2, F2RL1	105	829	16650	9.94658	4.76225e-35	2.97641e-36	1.96432e-36
GOTERM_BP_FAT	GO:0051247~positive regulation of protein metabolic process	63	58.8785	3.40285e-38	APP, CSF2, IFNA1, PIK3CB, HMGB1, FGF2, TNF, PIK3CG, ICAM1, AIFM1, CASP3, CAMP, RIPK3, PRKCD, IL18, MIF, F2, MMP9, RHOA, IL1A, IFNG, IL1B, ITGA5, EZR, TLR4, TP53, TLR3, CALCA, SRC, AGER, EGFR, RELA, HSPD1, INS, PTPA, CCL5, CCL4, CCL2, FYN, PLCG1, ELANE, JUN, XBP1, TGFB1, IFNB1, FN1, PTPN11, MAPK14, IL2, PTK2, KLF2, SOD1, VEGFA, IL3, IL6, IL5, IL9, BCL2, BAX, F2RL1, GHRL, NFE2L2, HSPA1A	105	1508	16650	6.62467	1.65821e-34	9.75418e-36	6.4374e-36
GOTERM_BP_FAT	GO:0009617~response to bacterium	45	42.0561	5.52792e-38	CRP, APP, CALCA, CSF2, CXCL8, SRC, PTGS2, TNF, RELA, HSPD1, ICAM1, CASP3, CCL5, MRC1, CCL2, CCR5, B2M, ELANE, CAMP, MBL2, IL10, XBP1, JUN, TGFB1, NOS2, IFNB1, PRKCD, IL18, ISG15, DEFA1, MIF, MAPK14, SOD2, NFKB1, CXCL10, CXCL11, IL6, IFNG, IRF3, IL1B, F2RL1, TLR5, TLR4, TLR3, TLR2	105	544	16650	13.1171	2.69375e-34	1.49653e-35	9.87655e-36
GOTERM_BP_FAT	GO:0009967~positive regulation of signal transduction	61	57.0093	3.31456e-37	CSF2, PIK3CB, HMGB1, FGF2, TNF, PIK3CG, ICAM1, IL10, RIPK3, PRKCD, IL18, MIF, ACTN4, F2, MMP9, RHOA, IL1A, IFNG, IRF3, IL1B, ITGA5, TLR5, TLR4, TP53, TLR3, TLR2, SRC, PTGS2, HIF1A, AGER, EGFR, RELA, INS, CXCR3, CCL5, CCL4, CCL2, FYN, PLCG1, ELANE, JUN, XBP1, TGFB1, IFNB1, PTPN11, MAPK14, NFKB1, IL2, PTK2, SOD1, VEGFA, CXCL10, IL3, CXCL11, IL6, IL5, BCL2, BAX, F2RL1, GHRL, HSPA1A	105	1428	16650	6.77371	1.61518e-33	8.50097e-35	5.61033e-35
GOTERM_BP_FAT	GO:0051240~positive regulation of multicellular organismal process	61	57.0093	3.7368e-37	CSF2, CXCL8, HMGB1, FGF2, TNF, ICAM1, AQP1, B2M, CAMP, IL10, IL18, MIF, F2, MMP9, RHOA, IL1A, IFNG, IRF3, IL1B, ITGA5, EZR, TLR5, TLR4, TLR3, TLR2, CALCA, SRC, PTGS2, HIF1A, AGER, EGFR, RELA, HSPD1, INS, CXCR3, CCL2, FYN, PLCG1, ELANE, JUN, XBP1, TGFB1, NOS2, FN1, ISG15, MAPK14, NFKB1, IL2, SOD1, VEGFA, IL3, IL6, IL5, IL2RA, IL9, BCL2, BAX, F2RL1, GHRL, NFE2L2, HSPA1A	105	1431	16650	6.75951	1.82094e-33	9.10472e-35	6.00878e-35
GOTERM_BP_FAT	GO:0001817~regulation of cytokine production	45	42.0561	7.24388e-37	CRP, CALCA, CSF2, SRC, HMGB1, PTGS2, HIF1A, TNF, AGER, RELA, HSPD1, INS, CCL2, B2M, ELANE, CAMP, IL10, XBP1, TGFB1, RIPK3, NOS2, IFNB1, IL18, FN1, ISG15, MIF, MAPK14, IL2, NFKB1, KLF2, SOD1, IL1A, IL6, IFNG, IRF3, IL1B, IL9, F2RL1, GHRL, EZR, TLR5, TLR4, TLR3, HSPA1A, TLR2	105	577	16650	12.3669	3.52994e-33	1.68093e-34	1.10935e-34
GOTERM_BP_FAT	GO:0070887~cellular response to chemical stimulus	75	70.0935	2.53214e-36	IFITM3, APP, CSF2, CXCL8, IFNA1, HMGB1, FGF2, TNF, PIK3CG, ICAM1, AQP1, AIFM1, CASP3, MRC1, CCR5, B2M, CAMP, IL10, IFNGR1, MMP2, PRKCD, IL18, MIF, RHOA, IL1A, IFNG, IRF3, IL1B, ITGA5, EZR, TLR5, TLR4, TP53, TLR3, TLR2, CALCA, SRC, PTGS2, HIF1A, EGFR, RELA, INS, CXCR3, CCL5, CCL4, CCL2, FYN, PLCG1, JUN, XBP1, TGFB1, NOS2, IFNB1, PTPN11, ISG15, DEFA1, MAPK14, SOD2, NFKB1, PTK2, KLF2, SOD1, VEGFA, C…	105	2648	16650	4.49126	1.23391e-32	5.60868e-34	3.70152e-34
GOTERM_BP_FAT	GO:0010647~positive regulation of cell communication	62	57.9439	3.02394e-36	CSF2, PIK3CB, HMGB1, FGF2, TNF, PIK3CG, ICAM1, GLUL, IL10, RIPK3, PRKCD, IL18, MIF, ACTN4, F2, MMP9, RHOA, IL1A, IFNG, IRF3, IL1B, ITGA5, TLR5, TLR4, TP53, TLR3, TLR2, SRC, PTGS2, HIF1A, AGER, EGFR, RELA, INS, CXCR3, CCL5, CCL4, CCL2, FYN, PLCG1, ELANE, JUN, XBP1, TGFB1, IFNB1, PTPN11, MAPK14, NFKB1, IL2, PTK2, SOD1, VEGFA, CXCL10, IL3, CXCL11, IL6, IL5, BCL2, BAX, F2RL1, GHRL, HSPA1A	105	1555	16650	6.32246	1.47356e-32	6.30943e-34	4.16399e-34
GOTERM_BP_FAT	GO:0080134~regulation of response to stress	58	54.2056	3.17493e-36	IFNA1, HMGB1, FGF2, TNF, PIK3CG, PLAU, B2M, IL10, IFNGR1, MMP2, PRKCD, IL18, MIF, F2, CLEC4A, IL1A, IFNG, IRF3, IL1B, EZR, TLR5, TLR4, TLR3, TLR2, SRC, PTGS2, HIF1A, AGER, EGFR, RELA, KNG1, HSPD1, INS, CCL5, CCL4, CCL2, FYN, CD55, ELANE, XBP1, TGFB1, NOS2, IFNB1, PTPN11, MAPK14, SOD2, NFKB1, IL2, SOD1, VEGFA, IL6, CD209, IL2RA, BAX, F2RL1, GHRL, NFE2L2, HSPA1A	105	1285	16650	7.15731	1.54714e-32	6.30943e-34	4.16399e-34
GOTERM_BP_FAT	GO:0042327~positive regulation of phosphorylation	52	48.5981	3.23693e-36	CSF2, IFNA1, PIK3CB, HMGB1, FGF2, TNF, PIK3CG, ICAM1, CAMP, RIPK3, PRKCD, IL18, MIF, F2, MMP9, RHOA, IL1A, IFNG, IL1B, ITGA5, TLR4, TP53, TLR3, CALCA, SRC, HIF1A, AGER, EGFR, INS, CCL5, CCL4, CCL2, FYN, PLCG1, ELANE, JUN, XBP1, TGFB1, IFNB1, PTPN11, MAPK14, IL2, PTK2, SOD1, VEGFA, IL3, IL6, IL5, BCL2, BAX, F2RL1, GHRL	105	932	16650	8.84733	1.57736e-32	6.30943e-34	4.16399e-34
GOTERM_BP_FAT	GO:0032270~positive regulation of cellular protein metabolic process	60	56.0748	3.57678e-36	APP, CSF2, IFNA1, PIK3CB, HMGB1, FGF2, TNF, PIK3CG, ICAM1, AIFM1, CASP3, CAMP, RIPK3, PRKCD, IL18, MIF, F2, MMP9, RHOA, IL1A, IFNG, IL1B, ITGA5, EZR, TLR4, TP53, TLR3, CALCA, SRC, AGER, EGFR, HSPD1, INS, PTPA, CCL5, CCL4, CCL2, FYN, PLCG1, ELANE, JUN, XBP1, TGFB1, IFNB1, FN1, PTPN11, MAPK14, IL2, PTK2, SOD1, VEGFA, IL3, IL6, IL5, BCL2, BAX, F2RL1, GHRL, NFE2L2, HSPA1A	105	1420	16650	6.7002	1.74297e-32	6.70371e-34	4.4242e-34
GOTERM_BP_FAT	GO:0023056~positive regulation of signaling	62	57.9439	4.06714e-36	CSF2, PIK3CB, HMGB1, FGF2, TNF, PIK3CG, ICAM1, GLUL, IL10, RIPK3, PRKCD, IL18, MIF, ACTN4, F2, MMP9, RHOA, IL1A, IFNG, IRF3, IL1B, ITGA5, TLR5, TLR4, TP53, TLR3, TLR2, SRC, PTGS2, HIF1A, AGER, EGFR, RELA, INS, CXCR3, CCL5, CCL4, CCL2, FYN, PLCG1, ELANE, JUN, XBP1, TGFB1, IFNB1, PTPN11, MAPK14, NFKB1, IL2, PTK2, SOD1, VEGFA, CXCL10, IL3, CXCL11, IL6, IL5, BCL2, BAX, F2RL1, GHRL, HSPA1A	105	1563	16650	6.2901	1.98192e-32	7.34043e-34	4.84441e-34
GOTERM_BP_FAT	GO:0001934~positive regulation of protein phosphorylation	51	47.6636	5.8642e-36	CSF2, IFNA1, PIK3CB, HMGB1, FGF2, TNF, PIK3CG, ICAM1, CAMP, RIPK3, PRKCD, IL18, MIF, F2, MMP9, RHOA, IL1A, IFNG, IL1B, ITGA5, TLR4, TP53, TLR3, CALCA, SRC, AGER, EGFR, INS, CCL5, CCL4, CCL2, FYN, PLCG1, ELANE, JUN, XBP1, TGFB1, IFNB1, PTPN11, MAPK14, IL2, PTK2, SOD1, VEGFA, IL3, IL6, IL5, BCL2, BAX, F2RL1, GHRL	105	890	16650	9.08668	2.85762e-32	1.02058e-33	6.73545e-34
GOTERM_BP_FAT	GO:1902531~regulation of intracellular signal transduction	63	58.8785	6.26051e-35	CSF2, IFNA1, PIK3CB, HMGB1, FGF2, TNF, PIK3CG, ICAM1, IL10, RIPK3, PRKCD, IL18, MIF, ACTN4, F2, MMP9, RHOA, IL1A, IFNG, IRF3, IL1B, EZR, TLR4, TP53, TLR3, TLR2, SRC, PTGS2, HIF1A, AGER, EGFR, RELA, INS, CXCR3, CCL5, CCL4, CCL2, FYN, PLCG1, ELANE, JUN, XBP1, TGFB1, IFNB1, FN1, PTPN11, MAPK14, SOD2, IL2, PTK2, SOD1, VEGFA, CXCL10, IL3, CXCL11, IL6, IL5, BCL2, BAX, F2RL1, GHRL, NFE2L2, HSPA1A	105	1714	16650	5.82847	3.05075e-31	1.05198e-32	6.94269e-33
GOTERM_BP_FAT	GO:0031325~positive regulation of cellular metabolic process	75	70.0935	3.11177e-34	APP, CSF2, IFNA1, PIK3CB, HMGB1, FGF2, TNF, PIK3CG, ICAM1, AIFM1, CASP3, CAMP, IL10, RIPK3, PRKCD, IL18, MIF, F2, MMP9, RHOA, IL1A, IFNG, IL1B, ITGA5, EZR, TLR5, TLR4, TP53, TLR3, TLR2, CRP, CALCA, SRC, PTGS2, HIF1A, AGER, EGFR, RELA, HSPD1, INS, PTPA, CXCR3, CCL5, CCL4, CCL2, FYN, PLCG1, ELANE, JUN, XBP1, TGFB1, NOS2, IFNB1, FN1, PTPN11, MAPK14, SOD2, NFKB1, IL2, PTK2, KLF2, SOD1, VEGFA, CXCL10,…	105	2839	16650	4.1891	1.51636e-30	5.05455e-32	3.33581e-32
GOTERM_BP_FAT	GO:0032496~response to lipopolysaccharide	35	32.7103	8.65561e-34	CSF2, CXCL8, SRC, PTGS2, TNF, RELA, HSPD1, ICAM1, CASP3, CCL5, MRC1, CCL2, CCR5, B2M, ELANE, CAMP, IL10, XBP1, JUN, TGFB1, NOS2, IL18, MIF, MAPK14, SOD2, NFKB1, CXCL10, CXCL11, IL6, IFNG, IRF3, IL1B, TLR5, TLR4, TLR2	105	302	16650	18.3775	4.21788e-30	1.36061e-31	8.9795e-32
GOTERM_BP_FAT	GO:0051246~regulation of protein metabolic process	71	66.3551	1.79073e-33	APP, CSF2, IFNA1, PIK3CB, HMGB1, FGF2, TNF, PIK3CG, ICAM1, AQP1, AIFM1, CASP3, CAMP, IL10, RIPK3, PRKCD, IL18, MIF, F2, MMP9, RHOA, IL1A, IFNG, IL1B, ITGA5, EZR, TLR4, TP53, TLR3, CALCA, SRC, AGER, EGFR, RELA, KNG1, HSPD1, INS, PTPA, CCL5, CCL4, CCL2, FYN, PLCG1, CD55, ELANE, JUN, XBP1, TGFB1, NOS2, IFNB1, FN1, PTPN11, ISG15, MAPK14, NFKB1, IL2, PTK2, KLF2, SOD1, VEGFA, CXCL10, IL3, IL6, IL5, IL9…	105	2512	16650	4.48192	8.72623e-30	2.72695e-31	1.79968e-31
GOTERM_BP_FAT	GO:0019220~regulation of phosphate metabolic process	60	56.0748	3.88066e-33	APP, CSF2, IFNA1, PIK3CB, HMGB1, FGF2, TNF, PIK3CG, ICAM1, CAMP, RIPK3, PRKCD, IL18, MIF, F2, MMP9, RHOA, IL1A, IFNG, IL1B, ITGA5, EZR, TLR4, TP53, TLR3, CALCA, SRC, HIF1A, AGER, EGFR, INS, PTPA, CXCR3, CCL5, CCL4, CCL2, FYN, PLCG1, ELANE, JUN, XBP1, TGFB1, NOS2, IFNB1, FN1, PTPN11, MAPK14, IL2, PTK2, SOD1, VEGFA, CXCL10, IL3, CXCL11, IL6, IL5, BCL2, BAX, F2RL1, GHRL	105	1610	16650	5.90949	1.89105e-29	5.73044e-31	3.78188e-31
GOTERM_BP_FAT	GO:0051174~regulation of phosphorus metabolic process	60	56.0748	4.01613e-33	APP, CSF2, IFNA1, PIK3CB, HMGB1, FGF2, TNF, PIK3CG, ICAM1, CAMP, RIPK3, PRKCD, IL18, MIF, F2, MMP9, RHOA, IL1A, IFNG, IL1B, ITGA5, EZR, TLR4, TP53, TLR3, CALCA, SRC, HIF1A, AGER, EGFR, INS, PTPA, CXCR3, CCL5, CCL4, CCL2, FYN, PLCG1, ELANE, JUN, XBP1, TGFB1, NOS2, IFNB1, FN1, PTPN11, MAPK14, IL2, PTK2, SOD1, VEGFA, CXCL10, IL3, CXCL11, IL6, IL5, BCL2, BAX, F2RL1, GHRL	105	1611	16650	5.90583	1.95706e-29	5.75606e-31	3.79879e-31
GOTERM_BP_FAT	GO:0002237~response to molecule of bacterial origin	35	32.7103	4.15795e-33	CSF2, CXCL8, SRC, PTGS2, TNF, RELA, HSPD1, ICAM1, CASP3, CCL5, MRC1, CCL2, CCR5, B2M, ELANE, CAMP, IL10, XBP1, JUN, TGFB1, NOS2, IL18, MIF, MAPK14, SOD2, NFKB1, CXCL10, CXCL11, IL6, IFNG, IRF3, IL1B, TLR5, TLR4, TLR2	105	316	16650	17.5633	2.02617e-29	5.78905e-31	3.82056e-31
GOTERM_BP_FAT	GO:0008283~cell proliferation	63	58.8785	7.41812e-33	CSF2, CXCL8, IFNA1, PIK3CB, HMGB1, FGF2, TNF, PIK3CG, AQP1, GLUL, CAMP, IL10, RIPK3, MMP2, PRKCD, IL18, MIF, F2, MMP9, RHOA, IL1A, IFNG, IL1B, TLR4, TP53, TLR2, CALCA, ABCB1, SRC, PTGS2, HIF1A, AGER, EGFR, RELA, HSPD1, INS, CXCR3, CCL5, CCL2, FYN, CD55, ELANE, JUN, XBP1, TGFB1, IFNB1, FN1, MAPK14, SOD2, IL2, PTK2, VEGFA, CXCL10, IL3, IL6, IL5, CD209, IL2RA, IL9, BCL2, BAX, F2RL1, GHRL	105	1861	16650	5.36808	3.61485e-29	9.8558e-31	6.50446e-31
GOTERM_BP_FAT	GO:0051050~positive regulation of transport	49	45.7944	7.48337e-33	HMGB1, TNF, AQP1, B2M, GLUL, CAMP, MBL2, IL10, PRKCD, IL18, MIF, ACTN4, F2, RHOA, IL1A, IFNG, IRF3, IL1B, EZR, TLR4, TP53, TLR3, TLR2, SRC, PTGS2, HIF1A, EGFR, HSPD1, INS, CXCR3, CCL5, CCL4, CCL2, PLCG1, XBP1, TGFB1, PTPN11, MAPK14, IL2, VEGFA, CXCL10, CXCL11, IL6, IL5, BCL2, BAX, F2RL1, GHRL, NFE2L2	105	920	16650	8.44565	3.64665e-29	9.8558e-31	6.50446e-31
GOTERM_BP_FAT	GO:0031347~regulation of defense response	44	41.1215	1.23737e-32	IFNA1, SRC, HMGB1, PTGS2, TNF, AGER, RELA, EGFR, PIK3CG, HSPD1, INS, CCL5, CCL4, CCL2, FYN, B2M, CD55, ELANE, IL10, TGFB1, NOS2, IFNB1, IFNGR1, MMP2, PRKCD, IL18, PTPN11, MAPK14, IL2, NFKB1, CLEC4A, IL6, IFNG, IRF3, CD209, IL1B, IL2RA, F2RL1, GHRL, TLR5, TLR4, TLR3, HSPA1A, TLR2	105	676	16650	10.3212	6.02971e-29	1.58677e-30	1.04721e-30
GOTERM_BP_FAT	GO:0071222~cellular response to lipopolysaccharide	28	26.1682	1.52839e-32	CSF2, CXCL8, SRC, TNF, RELA, ICAM1, CCL5, MRC1, CCL2, CCR5, B2M, CAMP, IL10, XBP1, TGFB1, NOS2, IL18, MIF, MAPK14, NFKB1, CXCL10, IL6, IFNG, IRF3, IL1B, TLR5, TLR4, TLR2	105	149	16650	29.7987	7.44786e-29	1.90971e-30	1.26034e-30
GOTERM_BP_FAT	GO:0001932~regulation of protein phosphorylation	55	51.4019	1.65282e-32	APP, CSF2, IFNA1, PIK3CB, HMGB1, FGF2, TNF, PIK3CG, ICAM1, CAMP, RIPK3, PRKCD, IL18, MIF, F2, MMP9, RHOA, IL1A, IFNG, IL1B, ITGA5, EZR, TLR4, TP53, TLR3, CALCA, SRC, AGER, EGFR, INS, CCL5, CCL4, CCL2, FYN, PLCG1, ELANE, JUN, XBP1, TGFB1, IFNB1, FN1, PTPN11, MAPK14, IL2, PTK2, SOD1, VEGFA, CXCL10, IL3, IL6, IL5, BCL2, BAX, F2RL1, GHRL	105	1300	16650	6.70879	8.05421e-29	2.01355e-30	1.32887e-30
GOTERM_BP_FAT	GO:0009966~regulation of signal transduction	72	67.2897	3.38002e-32	APP, CSF2, CXCL8, IFNA1, PIK3CB, HMGB1, FGF2, TNF, PIK3CG, ICAM1, PLAU, IL10, RIPK3, IFNGR1, PRKCD, IL18, MIF, ACTN4, F2, MMP9, RHOA, IL1A, IFNG, IRF3, IL1B, ITGA5, EZR, TLR5, TLR4, TP53, TLR3, TLR2, CALCA, SRC, PTGS2, HIF1A, AGER, EGFR, RELA, INS, CXCR3, CCL5, CCL4, CCL2, FYN, PLCG1, CD55, ELANE, JUN, XBP1, TGFB1, IFNB1, FN1, PTPN11, MAPK14, SOD2, NFKB1, IL2, PTK2, SOD1, VEGFA, CXCL10, IL3, CXCL…	105	2728	16650	4.18517	1.64708e-28	4.01728e-30	2.65125e-30
GOTERM_BP_FAT	GO:0071216~cellular response to biotic stimulus	29	27.1028	3.83017e-32	CSF2, CXCL8, SRC, TNF, RELA, ICAM1, CCL5, MRC1, CCL2, CCR5, B2M, CAMP, IL10, XBP1, TGFB1, NOS2, IL18, MIF, MAPK14, NFKB1, CXCL10, IL6, IFNG, IRF3, IL1B, TLR5, TP53, TLR4, TLR2	105	175	16650	26.2776	1.86644e-28	4.44391e-30	2.93282e-30
GOTERM_BP_FAT	GO:0042325~regulation of phosphorylation	56	52.3364	4.39114e-32	APP, CSF2, IFNA1, PIK3CB, HMGB1, FGF2, TNF, PIK3CG, ICAM1, CAMP, RIPK3, PRKCD, IL18, MIF, F2, MMP9, RHOA, IL1A, IFNG, IL1B, ITGA5, EZR, TLR4, TP53, TLR3, CALCA, SRC, HIF1A, AGER, EGFR, INS, CCL5, CCL4, CCL2, FYN, PLCG1, ELANE, JUN, XBP1, TGFB1, IFNB1, FN1, PTPN11, MAPK14, IL2, PTK2, SOD1, VEGFA, CXCL10, IL3, IL6, IL5, BCL2, BAX, F2RL1, GHRL	105	1393	16650	6.37473	2.1398e-28	4.88625e-30	3.22474e-30
GOTERM_BP_FAT	GO:0009893~positive regulation of metabolic process	75	70.0935	4.41196e-32	APP, CSF2, IFNA1, PIK3CB, HMGB1, FGF2, TNF, PIK3CG, ICAM1, AIFM1, CASP3, CAMP, IL10, RIPK3, PRKCD, IL18, MIF, F2, MMP9, RHOA, IL1A, IFNG, IL1B, ITGA5, EZR, TLR5, TLR4, TP53, TLR3, TLR2, CRP, CALCA, SRC, PTGS2, HIF1A, AGER, EGFR, RELA, HSPD1, INS, PTPA, CXCR3, CCL5, CCL4, CCL2, FYN, PLCG1, ELANE, JUN, XBP1, TGFB1, NOS2, IFNB1, FN1, PTPN11, MAPK14, SOD2, NFKB1, IL2, PTK2, KLF2, SOD1, VEGFA, CXCL10,…	105	3052	16650	3.89674	2.14995e-28	4.88625e-30	3.22474e-30
GOTERM_BP_FAT	GO:0071219~cellular response to molecule of bacterial origin	28	26.1682	4.78498e-32	CSF2, CXCL8, SRC, TNF, RELA, ICAM1, CCL5, MRC1, CCL2, CCR5, B2M, CAMP, IL10, XBP1, TGFB1, NOS2, IL18, MIF, MAPK14, NFKB1, CXCL10, IL6, IFNG, IRF3, IL1B, TLR5, TLR4, TLR2	105	155	16650	28.6452	2.33172e-28	5.1816e-30	3.41966e-30
GOTERM_BP_FAT	GO:1901700~response to oxygen-containing compound	57	53.271	4.96124e-32	APP, CSF2, CXCL8, TNF, PIK3CG, ICAM1, AQP1, AIFM1, CASP3, MRC1, CCR5, B2M, GLUL, CAMP, IL10, MMP2, PRKCD, IL18, MIF, IFNG, IRF3, IL1B, EZR, TLR5, TLR4, TLR2, SRC, PTGS2, HIF1A, EGFR, RELA, HSPD1, INS, CCL5, CCL2, FYN, CD55, ELANE, JUN, XBP1, TGFB1, NOS2, IFNB1, PTPN11, MAPK14, SOD2, NFKB1, IL2, PTK2, KLF2, SOD1, CXCL10, CXCL11, IL6, BCL2, GHRL, NFE2L2	105	1466	16650	6.16546	2.41761e-28	5.25568e-30	3.46855e-30
GOTERM_BP_FAT	GO:0035556~intracellular signal transduction	71	66.3551	6.75874e-32	CSF2, CXCL8, IFNA1, PIK3CB, HMGB1, FGF2, TNF, PIK3CG, ICAM1, AIFM1, CASP3, CCR5, IL10, RIPK3, PRKCD, IL18, MIF, ACTN4, F2, MMP9, RHOA, IL1A, IFNG, IRF3, IL1B, EZR, TLR4, TP53, TLR3, TLR2, SRC, PTGS2, HIF1A, AGER, EGFR, RELA, INS, CXCR3, CCL5, CCL4, CCL2, FYN, PLCG1, ELANE, JUN, XBP1, TGFB1, NOS2, IFNB1, FN1, PTPN11, MAPK14, SOD2, NFKB1, IL2, PTK2, SOD1, VEGFA, CXCL10, IL3, CXCL11, IL6, IL5, CD209…	105	2657	16650	4.23732	3.29353e-28	6.89674e-30	4.5516e-30
GOTERM_BP_FAT	GO:0031401~positive regulation of protein modification process	52	48.5981	6.79343e-32	CSF2, IFNA1, PIK3CB, HMGB1, FGF2, TNF, PIK3CG, ICAM1, CAMP, RIPK3, PRKCD, IL18, MIF, F2, MMP9, RHOA, IL1A, IFNG, IL1B, ITGA5, TLR4, TP53, TLR3, CALCA, SRC, AGER, EGFR, INS, PTPA, CCL5, CCL4, CCL2, FYN, PLCG1, ELANE, JUN, XBP1, TGFB1, IFNB1, PTPN11, MAPK14, IL2, PTK2, SOD1, VEGFA, IL3, IL6, IL5, BCL2, BAX, F2RL1, GHRL	105	1143	16650	7.2141	3.31044e-28	6.89674e-30	4.5516e-30
GOTERM_BP_FAT	GO:0050776~regulation of immune response	48	44.8598	7.64423e-32	IFNA1, SRC, HMGB1, PIK3CB, TNF, AGER, RELA, HSPD1, INS, ICAM1, CCL5, FYN, PLCG1, B2M, CD55, ELANE, MBL2, IL10, XBP1, JUN, TGFB1, RIPK3, IFNB1, IFNGR1, MMP2, PRKCD, IL18, PTPN11, MIF, IL2, PTK2, NFKB1, CLEC4A, IL6, IFNG, IRF3, CD209, IL1B, IL2RA, BCL2, BAX, F2RL1, EZR, TLR5, TLR4, TLR3, HSPA1A, TLR2	105	912	16650	8.34586	3.72504e-28	7.45007e-30	4.91677e-30
GOTERM_BP_FAT	GO:1901701~cellular response to oxygen-containing compound	48	44.8598	7.64423e-32	APP, CSF2, CXCL8, SRC, PTGS2, HIF1A, TNF, RELA, EGFR, PIK3CG, AQP1, INS, ICAM1, AIFM1, CCL5, MRC1, CCL2, FYN, CCR5, B2M, CAMP, IL10, XBP1, TGFB1, NOS2, IFNB1, MMP2, PRKCD, IL18, PTPN11, MIF, MAPK14, SOD2, PTK2, NFKB1, KLF2, SOD1, CXCL10, IL6, IFNG, IRF3, IL1B, GHRL, EZR, TLR5, TLR4, NFE2L2, TLR2	105	912	16650	8.34586	3.72504e-28	7.45007e-30	4.91677e-30
GOTERM_BP_FAT	GO:0051049~regulation of transport	61	57.0093	1.38015e-31	PIK3CB, HMGB1, TNF, PIK3CG, ICAM1, AQP1, B2M, GLUL, CAMP, MBL2, IL10, PRKCD, IL18, MIF, ACTN4, F2, MMP9, RHOA, IL1A, IFNG, IRF3, IL1B, CRYAA, EZR, TLR5, TLR4, TP53, TLR3, TLR2, CRP, CALCA, SRC, PTGS2, HIF1A, EGFR, HSPD1, INS, CXCR3, CCL5, CCL4, CCL2, PLCG1, XBP1, TGFB1, NOS2, FN1, PTPN11, MAPK14, NFKB1, IL2, VEGFA, CXCL10, CXCL11, IL6, IL5, BCL2, BAX, F2RL1, GHRL, NFE2L2, HSPA1A	105	1796	16650	5.38578	6.72548e-28	1.31872e-29	8.70307e-30
GOTERM_BP_FAT	GO:0001819~positive regulation of cytokine production	36	33.6449	1.69962e-31	CALCA, CSF2, SRC, HMGB1, PTGS2, HIF1A, TNF, AGER, RELA, HSPD1, INS, CCL2, B2M, ELANE, CAMP, IL10, XBP1, TGFB1, IL18, MIF, MAPK14, IL2, NFKB1, SOD1, IL1A, IL6, IFNG, IRF3, IL1B, IL9, F2RL1, TLR5, TLR4, TLR3, HSPA1A, TLR2	105	386	16650	14.789	8.28224e-28	1.59274e-29	1.05115e-29
GOTERM_BP_FAT	GO:0010646~regulation of cell communication	74	69.1589	2.3683e-31	APP, CSF2, CXCL8, IFNA1, PIK3CB, HMGB1, FGF2, TNF, PIK3CG, ICAM1, PLAU, GLUL, IL10, RIPK3, IFNGR1, PRKCD, IL18, MIF, ACTN4, F2, MMP9, RHOA, IL1A, IFNG, IRF3, IL1B, ITGA5, EZR, TLR5, TLR4, TP53, TLR3, TLR2, CALCA, SRC, PTGS2, HIF1A, AGER, EGFR, RELA, INS, CXCR3, CCL5, CCL4, CCL2, FYN, PLCG1, CD55, ELANE, JUN, XBP1, TGFB1, NOS2, IFNB1, FN1, PTPN11, MAPK14, SOD2, NFKB1, IL2, PTK2, SOD1, VEGFA, CXCL1…	105	3020	16650	3.88553	1.15407e-27	2.1775e-29	1.43707e-29
GOTERM_BP_FAT	GO:0032268~regulation of cellular protein metabolic process	67	62.6168	3.96417e-31	APP, CSF2, IFNA1, PIK3CB, HMGB1, FGF2, TNF, PIK3CG, ICAM1, AQP1, AIFM1, CASP3, CAMP, IL10, RIPK3, PRKCD, IL18, MIF, F2, MMP9, RHOA, IL1A, IFNG, IL1B, ITGA5, EZR, TLR4, TP53, TLR3, CALCA, SRC, AGER, EGFR, KNG1, HSPD1, INS, PTPA, CCL5, CCL4, CCL2, FYN, PLCG1, CD55, ELANE, JUN, XBP1, TGFB1, IFNB1, FN1, PTPN11, ISG15, MAPK14, NFKB1, IL2, PTK2, SOD1, VEGFA, CXCL10, IL3, IL6, IL5, BCL2, BAX, F2RL1, GHR…	105	2346	16650	4.52868	1.93174e-27	3.5773e-29	2.36089e-29
GOTERM_BP_FAT	GO:0023051~regulation of signaling	74	69.1589	7.10809e-31	APP, CSF2, CXCL8, IFNA1, PIK3CB, HMGB1, FGF2, TNF, PIK3CG, ICAM1, PLAU, GLUL, IL10, RIPK3, IFNGR1, PRKCD, IL18, MIF, ACTN4, F2, MMP9, RHOA, IL1A, IFNG, IRF3, IL1B, ITGA5, EZR, TLR5, TLR4, TP53, TLR3, TLR2, CALCA, SRC, PTGS2, HIF1A, AGER, EGFR, RELA, INS, CXCR3, CCL5, CCL4, CCL2, FYN, PLCG1, CD55, ELANE, JUN, XBP1, TGFB1, NOS2, IFNB1, FN1, PTPN11, MAPK14, SOD2, NFKB1, IL2, PTK2, SOD1, VEGFA, CXCL1…	105	3070	16650	3.82224	3.46377e-27	6.29777e-29	4.15629e-29
GOTERM_BP_FAT	GO:0042127~regulation of cell proliferation	57	53.271	9.75782e-31	CSF2, CXCL8, HMGB1, FGF2, TNF, AQP1, PLAU, GLUL, CAMP, IL10, RIPK3, MMP2, IL18, MIF, F2, MMP9, RHOA, IL1A, IFNG, IL1B, TLR4, TP53, TLR2, SRC, PTGS2, HIF1A, AGER, EGFR, RELA, INS, CXCR3, CCL5, CCL2, FYN, CD55, ELANE, JUN, XBP1, TGFB1, NOS2, FN1, MAPK14, SOD2, IL2, PTK2, VEGFA, CXCL10, IL3, CXCL11, IL6, IL5, CD209, IL2RA, IL9, BCL2, BAX, GHRL	105	1552	16650	5.82382	4.75498e-27	8.40694e-29	5.54827e-29
GOTERM_BP_FAT	GO:0034097~response to cytokine	45	42.0561	9.83369e-31	IFITM3, CALCA, CXCL8, IFNA1, SRC, PTGS2, HIF1A, TNF, RELA, ICAM1, CASP3, CCL5, CXCR3, MRC1, CCL4, CCL2, CCR5, B2M, CAMP, XBP1, JUN, NOS2, IFNB1, IFNGR1, PRKCD, IL18, PTPN11, ISG15, NFKB1, KLF2, IL1A, IL3, CXCL10, CXCL11, IL6, IL5, IFNG, IRF3, IL1B, IL2RA, BCL2, F2RL1, TLR3, HSPA1A, NFE2L2	105	802	16650	8.8974	4.79196e-27	8.40694e-29	5.54827e-29
GOTERM_BP_FAT	GO:0032101~regulation of response to external stimulus	43	40.1869	2.94178e-30	CXCL8, HMGB1, PTGS2, FGF2, TNF, AGER, RELA, EGFR, PIK3CG, KNG1, HSPD1, INS, PLAU, CCL5, CXCR3, CCL4, CCL2, FYN, B2M, CD55, ELANE, IL10, TGFB1, NOS2, PRKCD, IL18, MIF, MAPK14, F2, IL2, NFKB1, VEGFA, CXCL10, CXCL11, IL6, IL1B, IL2RA, F2RL1, GHRL, TLR4, TLR3, NFE2L2, TLR2	105	721	16650	9.4571	1.43353e-26	2.4716e-28	1.63117e-28
GOTERM_BP_FAT	GO:0031399~regulation of protein modification process	58	54.2056	3.27766e-30	APP, CSF2, IFNA1, PIK3CB, HMGB1, FGF2, TNF, PIK3CG, ICAM1, CAMP, RIPK3, PRKCD, IL18, MIF, F2, MMP9, RHOA, IL1A, IFNG, IL1B, ITGA5, EZR, TLR4, TP53, TLR3, CALCA, SRC, AGER, EGFR, INS, PTPA, CCL5, CCL4, CCL2, FYN, PLCG1, ELANE, JUN, XBP1, TGFB1, IFNB1, FN1, PTPN11, ISG15, MAPK14, IL2, PTK2, SOD1, VEGFA, CXCL10, IL3, IL6, IL5, BCL2, BAX, F2RL1, GHRL, HSPA1A	105	1664	16650	5.52713	1.59721e-26	2.70713e-28	1.7866e-28
GOTERM_BP_FAT	GO:0040017~positive regulation of locomotion	36	33.6449	3.79997e-30	CXCL8, SRC, HMGB1, PTGS2, FGF2, HIF1A, TNF, AGER, EGFR, INS, ICAM1, PLAU, CCL5, CXCR3, CCL4, CCL2, PLCG1, ELANE, XBP1, JUN, TGFB1, FN1, ACTN4, MAPK14, MMP9, PTK2, VEGFA, IL1A, CXCL10, CXCL11, IL6, IFNG, BCL2, F2RL1, ITGA5, NFE2L2	105	422	16650	13.5274	1.85172e-26	3.08621e-28	2.03678e-28
GOTERM_BP_FAT	GO:0044093~positive regulation of molecular function	60	56.0748	5.85932e-30	APP, CSF2, PIK3CB, HMGB1, FGF2, TNF, PIK3CG, ICAM1, AIFM1, CASP3, B2M, IL10, SFTPB, RIPK3, PRKCD, IL18, MIF, ACTN4, F2, MMP9, RHOA, IFNG, IL1B, TLR4, TLR3, TLR2, CALCA, SRC, HIF1A, AGER, EGFR, RELA, HSPD1, INS, PTPA, CCL5, CCL4, CCL2, FYN, PLCG1, ELANE, JUN, TGFB1, NOS2, FN1, PTPN11, MAPK14, NFKB1, IL2, PTK2, SOD1, VEGFA, IL3, IL6, IL5, IL2RA, BCL2, BAX, GHRL, HSPA1A	105	1840	16650	5.17081	2.85525e-26	4.68074e-28	3.08911e-28
GOTERM_BP_FAT	GO:0012501~programmed cell death	60	56.0748	8.34108e-30	APP, CSF2, HMGB1, FGF2, TNF, PIK3CG, ICAM1, AQP1, AIFM1, CASP3, IL10, RIPK3, SIGMAR1, PRKCD, MIF, ACTN4, MMP9, IL1A, IFNG, IRF3, IL1B, ITGA5, CRYAA, TLR4, TP53, TLR3, TLR2, SRC, PTGS2, HIF1A, EGFR, RELA, KNG1, HSPD1, INS, PTPA, SGPL1, CXCR3, CCL5, CCL2, FYN, JUN, XBP1, TGFB1, IFNB1, MAPK14, SOD2, NFKB1, IL2, PTK2, SOD1, VEGFA, IL6, IL2RA, ALB, BCL2, BAX, GHRL, NFE2L2, HSPA1A	105	1852	16650	5.1373	4.06461e-26	6.55582e-28	4.3266e-28
GOTERM_BP_FAT	GO:0002252~immune effector process	43	40.1869	9.37478e-30	IFITM3, CRP, IFNA1, SRC, HMGB1, PIK3CB, TNF, AGER, RELA, PIK3CG, HSPD1, INS, ICAM1, CCL2, FYN, PLCG1, B2M, CD55, ELANE, MBL2, IL10, XBP1, TGFB1, RIPK3, IFNB1, PRKCD, IL18, ISG15, DEFA1, MIF, IL2, PTK2, CXCL10, IL6, IL5, IFNG, IRF3, IL1B, IL2RA, BCL2, F2RL1, TLR4, TLR3	105	742	16650	9.18945	4.56833e-26	7.25132e-28	4.7856e-28
GOTERM_BP_FAT	GO:0006915~apoptotic process	58	54.2056	4.23857e-29	APP, CSF2, HMGB1, TNF, PIK3CG, ICAM1, AQP1, AIFM1, CASP3, IL10, RIPK3, SIGMAR1, PRKCD, MIF, MMP9, IL1A, IFNG, IRF3, IL1B, ITGA5, CRYAA, TLR4, TP53, TLR3, TLR2, SRC, PTGS2, HIF1A, EGFR, RELA, KNG1, HSPD1, INS, PTPA, SGPL1, CXCR3, CCL5, CCL2, FYN, JUN, XBP1, TGFB1, IFNB1, MAPK14, SOD2, NFKB1, IL2, PTK2, SOD1, VEGFA, IL6, IL2RA, ALB, BCL2, BAX, GHRL, NFE2L2, HSPA1A	105	1747	16650	5.26454	2.06545e-25	3.22727e-27	2.12988e-27
GOTERM_BP_FAT	GO:0016477~cell migration	50	46.729	5.87254e-29	CXCL8, PIK3CB, HMGB1, FGF2, TNF, PIK3CG, ICAM1, PLAU, CCR5, IL10, RIPK3, PRKCD, MIF, ACTN4, F2, MMP9, RHOA, IL1A, IFNG, IL1B, ITGA5, CALCA, SRC, PTGS2, HIF1A, EGFR, INS, SGPL1, CXCR3, CCL5, CCL4, CCL2, FYN, PLCG1, ELANE, JUN, XBP1, TGFB1, FN1, PTPN11, MAPK14, PTK2, VEGFA, CXCL10, CXCL11, IL6, BCL2, BAX, F2RL1, NFE2L2	105	1184	16650	6.69643	2.86169e-25	4.4026e-27	2.90555e-27
GOTERM_BP_FAT	GO:0040011~locomotion	55	51.4019	6.08145e-29	APP, CXCL8, PIK3CB, HMGB1, FGF2, TNF, PIK3CG, ICAM1, PLAU, CCR5, IL10, RIPK3, PRKCD, MIF, ACTN4, F2, MMP9, RHOA, IL1A, IFNG, IL1B, ITGA5, EZR, CALCA, SRC, PTGS2, HIF1A, AGER, EGFR, INS, SGPL1, CXCR3, CCL5, CCL4, CCL2, FYN, PLCG1, ELANE, JUN, XBP1, TGFB1, FN1, PTPN11, DEFA1, MAPK14, PTK2, VEGFA, CXCL10, CXCL11, IL6, BCL2, BAX, F2RL1, GHRL, NFE2L2	105	1530	16650	5.70028	2.96349e-25	4.49014e-27	2.96333e-27
GOTERM_BP_FAT	GO:2000377~regulation of reactive oxygen species metabolic process	26	24.2991	6.21479e-29	CRP, PTGS2, HIF1A, TNF, EGFR, HSPD1, INS, ICAM1, IL10, TGFB1, RIPK3, PRKCD, MAPK14, F2, SOD2, KLF2, SOD1, IL6, IFNG, IL1B, BCL2, F2RL1, TLR5, TP53, TLR4, NFE2L2	105	153	16650	26.9468	3.02847e-25	4.5201e-27	2.9831e-27
GOTERM_BP_FAT	GO:0010604~positive regulation of macromolecule metabolic process	70	65.4206	6.85909e-29	APP, CSF2, IFNA1, PIK3CB, HMGB1, FGF2, TNF, PIK3CG, ICAM1, AIFM1, CASP3, CAMP, IL10, RIPK3, PRKCD, IL18, MIF, F2, MMP9, RHOA, IL1A, IFNG, IL1B, ITGA5, EZR, TLR4, TP53, TLR3, TLR2, CRP, CALCA, SRC, HIF1A, AGER, EGFR, RELA, HSPD1, INS, PTPA, CXCR3, CCL5, CCL4, CCL2, FYN, PLCG1, ELANE, JUN, XBP1, TGFB1, IFNB1, FN1, PTPN11, MAPK14, NFKB1, IL2, PTK2, KLF2, SOD1, VEGFA, CXCL10, IL3, IL6, IL5, IL9, BCL2…	105	2856	16650	3.88655	3.34244e-25	4.91535e-27	3.24395e-27
GOTERM_BP_FAT	GO:0006468~protein phosphorylation	59	55.1402	8.7978e-29	APP, CSF2, IFNA1, PIK3CB, HMGB1, FGF2, TNF, PIK3CG, ICAM1, CCR5, CAMP, RIPK3, PRKCD, IL18, MIF, F2, MMP9, RHOA, IL1A, IFNG, IL1B, ITGA5, EZR, TLR4, TP53, TLR3, TLR2, CALCA, SRC, AGER, EGFR, INS, CCL5, CCL4, CCL2, FYN, PLCG1, ELANE, JUN, XBP1, TGFB1, IFNB1, FN1, PTPN11, MAPK14, NFKB1, IL2, PTK2, SOD1, VEGFA, CXCL10, IL3, IL6, IL5, IL2RA, BCL2, BAX, F2RL1, GHRL	105	1852	16650	5.05168	4.28717e-25	6.21329e-27	4.10054e-27
GOTERM_BP_FAT	GO:0043067~regulation of programmed cell death	53	49.5327	1.51406e-28	CSF2, HMGB1, FGF2, TNF, PIK3CG, ICAM1, AQP1, AIFM1, CASP3, IL10, RIPK3, SIGMAR1, PRKCD, MIF, ACTN4, MMP9, IL1A, IFNG, IL1B, ITGA5, CRYAA, TP53, TLR3, SRC, PTGS2, HIF1A, EGFR, RELA, KNG1, HSPD1, INS, PTPA, CXCR3, CCL5, CCL2, FYN, JUN, XBP1, TGFB1, IFNB1, SOD2, NFKB1, IL2, PTK2, SOD1, VEGFA, IL6, ALB, BCL2, BAX, GHRL, NFE2L2, HSPA1A	105	1413	16650	5.94783	7.37801e-25	1.054e-26	6.95602e-27
GOTERM_BP_FAT	GO:0008219~cell death	60	56.0748	1.69365e-28	APP, CSF2, HMGB1, FGF2, TNF, PIK3CG, ICAM1, AQP1, AIFM1, CASP3, IL10, RIPK3, SIGMAR1, PRKCD, MIF, ACTN4, MMP9, IL1A, IFNG, IRF3, IL1B, ITGA5, CRYAA, TLR4, TP53, TLR3, TLR2, SRC, PTGS2, HIF1A, EGFR, RELA, KNG1, HSPD1, INS, PTPA, SGPL1, CXCR3, CCL5, CCL2, FYN, JUN, XBP1, TGFB1, IFNB1, MAPK14, SOD2, NFKB1, IL2, PTK2, SOD1, VEGFA, IL6, IL2RA, ALB, BCL2, BAX, GHRL, NFE2L2, HSPA1A	105	1958	16650	4.85919	8.25318e-25	1.16242e-26	7.67154e-27
GOTERM_BP_FAT	GO:0030335~positive regulation of cell migration	34	31.7757	1.82606e-28	CXCL8, SRC, HMGB1, PTGS2, FGF2, HIF1A, TNF, EGFR, INS, ICAM1, PLAU, CCL5, CCL4, CCL2, PLCG1, ELANE, XBP1, JUN, TGFB1, FN1, ACTN4, MAPK14, MMP9, PTK2, VEGFA, IL1A, CXCL10, CXCL11, IL6, IFNG, BCL2, F2RL1, ITGA5, NFE2L2	105	395	16650	13.6492	8.89839e-25	1.23589e-26	8.1564e-27
GOTERM_BP_FAT	GO:0042592~homeostatic process	56	52.3364	2.14824e-28	APP, PIK3CB, HMGB1, AQP5, FGF2, TNF, PIK3CG, ICAM1, AQP1, AIFM1, CASP3, CCR5, B2M, CAMP, RIPK3, IL18, MIF, F2, IL1A, IFNG, IL1B, TLR4, CALCA, SRC, PTGS2, HIF1A, EGFR, KNG1, INS, CXCR3, CCL5, CCL2, PLCG1, CD55, ELANE, XBP1, TGFB1, NOS2, PTPN11, ISG15, MAPK14, SOD2, IL2, KLF2, SOD1, VEGFA, CXCL10, CXCL11, IL6, IL2RA, ALB, BCL2, BAX, F2RL1, GHRL, NFE2L2	105	1645	16650	5.39818	1.04684e-24	1.43402e-26	9.46403e-27
GOTERM_BP_FAT	GO:2000379~positive regulation of reactive oxygen species metabolic process	22	20.5607	3.22379e-28	CRP, TGFB1, RIPK3, PRKCD, F2, PTGS2, MAPK14, SOD2, TNF, EGFR, KLF2, INS, ICAM1, SOD1, IL6, IFNG, IL1B, F2RL1, TLR5, TP53, TLR4, NFE2L2	105	87	16650	40.0985	1.57095e-24	2.12291e-26	1.40104e-26
GOTERM_BP_FAT	GO:2000147~positive regulation of cell motility	34	31.7757	5.68939e-28	CXCL8, SRC, HMGB1, PTGS2, FGF2, HIF1A, TNF, EGFR, INS, ICAM1, PLAU, CCL5, CCL4, CCL2, PLCG1, ELANE, XBP1, JUN, TGFB1, FN1, ACTN4, MAPK14, MMP9, PTK2, VEGFA, IL1A, CXCL10, CXCL11, IL6, IFNG, BCL2, F2RL1, ITGA5, NFE2L2	105	409	16650	13.182	2.77244e-24	3.69659e-26	2.43961e-26
GOTERM_BP_FAT	GO:0050900~leukocyte migration	33	30.8411	7.83845e-28	CALCA, CXCL8, SRC, HMGB1, PIK3CB, TNF, PIK3CG, ICAM1, CCL5, CXCR3, CCL4, CCL2, FYN, PLCG1, CCR5, ELANE, IL10, TGFB1, RIPK3, FN1, PTPN11, MIF, F2, MMP9, VEGFA, IL1A, CXCL10, CXCL11, IL6, IFNG, IL1B, F2RL1, ITGA5	105	376	16650	13.9172	3.81968e-24	5.02589e-26	3.3169e-26
GOTERM_BP_FAT	GO:0042981~regulation of apoptotic process	52	48.5981	1.07232e-27	CSF2, HMGB1, TNF, PIK3CG, ICAM1, AQP1, AIFM1, CASP3, IL10, RIPK3, SIGMAR1, PRKCD, MIF, ACTN4, MMP9, IL1A, IFNG, IL1B, ITGA5, CRYAA, TP53, TLR3, SRC, PTGS2, HIF1A, EGFR, RELA, KNG1, HSPD1, INS, PTPA, CXCR3, CCL5, CCL2, FYN, JUN, XBP1, TGFB1, IFNB1, SOD2, NFKB1, IL2, PTK2, SOD1, VEGFA, IL6, ALB, BCL2, BAX, GHRL, NFE2L2, HSPA1A	105	1400	16650	5.8898	5.22539e-24	6.78622e-26	4.47866e-26
GOTERM_BP_FAT	GO:0045087~innate immune response	43	40.1869	1.11305e-27	IFITM3, APP, CALCA, IFNA1, SRC, HMGB1, AGER, RELA, PIK3CG, HSPD1, INS, ICAM1, CCL5, MRC1, CCL4, CCL2, FYN, B2M, CD55, CAMP, MBL2, TGFB1, NOS2, IFNB1, IFNGR1, MMP2, PRKCD, PTPN11, ISG15, DEFA1, MIF, PTK2, NFKB1, CLEC4A, IFNG, IRF3, CD209, F2RL1, TLR5, TLR4, TLR3, HSPA1A, TLR2	105	836	16650	8.15619	5.4239e-24	6.95371e-26	4.58919e-26
GOTERM_BP_FAT	GO:0072593~reactive oxygen species metabolic process	28	26.1682	1.21662e-27	CRP, PTGS2, HIF1A, TNF, EGFR, HSPD1, INS, ICAM1, IL10, TGFB1, RIPK3, NOS2, PRKCD, MAPK14, F2, SOD2, KLF2, SOD1, IL6, IFNG, IL1B, BCL2, F2RL1, TLR5, TP53, TLR4, NFE2L2, TLR2	105	222	16650	20	5.92861e-24	7.50457e-26	4.95274e-26
GOTERM_BP_FAT	GO:0051272~positive regulation of cellular component movement	34	31.7757	1.34892e-27	CXCL8, SRC, HMGB1, PTGS2, FGF2, HIF1A, TNF, EGFR, INS, ICAM1, PLAU, CCL5, CCL4, CCL2, PLCG1, ELANE, XBP1, JUN, TGFB1, FN1, ACTN4, MAPK14, MMP9, PTK2, VEGFA, IL1A, CXCL10, CXCL11, IL6, IFNG, BCL2, F2RL1, ITGA5, NFE2L2	105	420	16650	12.8367	6.57329e-24	8.21661e-26	5.42266e-26
GOTERM_BP_FAT	GO:0000165~MAPK cascade	43	40.1869	1.41092e-27	CSF2, SRC, HMGB1, PIK3CB, FGF2, TNF, AGER, EGFR, PIK3CG, INS, ICAM1, CCL5, CCL4, CCL2, FYN, PLCG1, CCR5, ELANE, XBP1, JUN, TGFB1, PRKCD, IL18, FN1, PTPN11, MIF, MAPK14, IL2, PTK2, NFKB1, SOD1, VEGFA, IL1A, IL3, IL6, IL5, IL1B, IL2RA, F2RL1, GHRL, EZR, TLR4, TLR3	105	841	16650	8.10769	6.87541e-24	8.48816e-26	5.60187e-26
GOTERM_BP_FAT	GO:0001775~cell activation	44	41.1215	2.5512e-27	CSF2, CXCL8, IFNA1, SRC, HMGB1, PIK3CB, AGER, EGFR, PIK3CG, HSPD1, INS, ICAM1, CCL5, CCL2, FYN, B2M, CD55, IL10, XBP1, JUN, TGFB1, RIPK3, IFNB1, PRKCD, IL18, PTPN11, MIF, F2, RHOA, IL2, SOD1, CXCL10, IL6, IL5, IFNG, CD209, IL1B, IL2RA, BCL2, BAX, F2RL1, TLR4, TLR3, TLR2	105	910	16650	7.66719	1.2432e-23	1.5161e-25	1.00057e-25
GOTERM_BP_FAT	GO:0010941~regulation of cell death	53	49.5327	3.53321e-27	CSF2, HMGB1, FGF2, TNF, PIK3CG, ICAM1, AQP1, AIFM1, CASP3, IL10, RIPK3, SIGMAR1, PRKCD, MIF, ACTN4, MMP9, IL1A, IFNG, IL1B, ITGA5, CRYAA, TP53, TLR3, SRC, PTGS2, HIF1A, EGFR, RELA, KNG1, HSPD1, INS, PTPA, CXCR3, CCL5, CCL2, FYN, JUN, XBP1, TGFB1, IFNB1, SOD2, NFKB1, IL2, PTK2, SOD1, VEGFA, IL6, ALB, BCL2, BAX, GHRL, NFE2L2, HSPA1A	105	1509	16650	5.56944	1.72173e-23	2.07438e-25	1.36901e-25
GOTERM_BP_FAT	GO:0071345~cellular response to cytokine stimulus	40	37.3832	4.47635e-27	IFITM3, CALCA, CXCL8, IFNA1, HIF1A, TNF, RELA, ICAM1, CCL5, CXCR3, MRC1, CCL4, CCL2, CCR5, B2M, CAMP, XBP1, NOS2, IFNB1, IFNGR1, PRKCD, IL18, PTPN11, ISG15, NFKB1, KLF2, IL1A, IL3, CXCL10, CXCL11, IL6, IL5, IFNG, IRF3, IL1B, IL2RA, F2RL1, TLR3, HSPA1A, NFE2L2	105	706	16650	8.98422	2.18133e-23	2.59682e-25	1.7138e-25
GOTERM_BP_FAT	GO:0023014~signal transduction by protein phosphorylation	43	40.1869	7.43721e-27	CSF2, SRC, HMGB1, PIK3CB, FGF2, TNF, AGER, EGFR, PIK3CG, INS, ICAM1, CCL5, CCL4, CCL2, FYN, PLCG1, CCR5, ELANE, XBP1, JUN, TGFB1, PRKCD, IL18, FN1, PTPN11, MIF, MAPK14, IL2, PTK2, NFKB1, SOD1, VEGFA, IL1A, IL3, IL6, IL5, IL1B, IL2RA, F2RL1, GHRL, EZR, TLR4, TLR3	105	877	16650	7.77488	3.62415e-23	4.26371e-25	2.81389e-25
GOTERM_BP_FAT	GO:0007166~cell surface receptor signaling pathway	66	61.6822	8.39829e-27	IFITM3, APP, CSF2, CXCL8, IFNA1, PIK3CB, FGF2, TNF, ICAM1, CASP3, CCR5, B2M, IFNGR1, MMP2, PRKCD, IL18, MIF, F2, MMP9, RHOA, CLEC4A, IL1A, IFNG, IRF3, IL1B, ITGA5, EZR, TLR4, TLR3, TLR2, SRC, HIF1A, AGER, EGFR, RELA, INS, SGPL1, CXCR3, CCL5, CCL4, CCL2, FYN, PLCG1, JUN, XBP1, TGFB1, IFNB1, PTPN11, ISG15, MAPK14, NFKB1, IL2, PTK2, VEGFA, CXCL10, IL3, CXCL11, IL6, IL5, CD209, IL2RA, BCL2, BAX, F2RL…	105	2669	16650	3.92121	4.09249e-23	4.7587e-25	3.14057e-25
GOTERM_BP_FAT	GO:0051674~localization of cell	50	46.729	1.16139e-26	CXCL8, PIK3CB, HMGB1, FGF2, TNF, PIK3CG, ICAM1, PLAU, CCR5, IL10, RIPK3, PRKCD, MIF, ACTN4, F2, MMP9, RHOA, IL1A, IFNG, IL1B, ITGA5, CALCA, SRC, PTGS2, HIF1A, EGFR, INS, SGPL1, CXCR3, CCL5, CCL4, CCL2, FYN, PLCG1, ELANE, JUN, XBP1, TGFB1, FN1, PTPN11, MAPK14, PTK2, VEGFA, CXCL10, CXCL11, IL6, BCL2, BAX, F2RL1, NFE2L2	105	1330	16650	5.96133	5.65944e-23	6.43119e-25	4.24434e-25
GOTERM_BP_FAT	GO:0048870~cell motility	50	46.729	1.16139e-26	CXCL8, PIK3CB, HMGB1, FGF2, TNF, PIK3CG, ICAM1, PLAU, CCR5, IL10, RIPK3, PRKCD, MIF, ACTN4, F2, MMP9, RHOA, IL1A, IFNG, IL1B, ITGA5, CALCA, SRC, PTGS2, HIF1A, EGFR, INS, SGPL1, CXCR3, CCL5, CCL4, CCL2, FYN, PLCG1, ELANE, JUN, XBP1, TGFB1, FN1, PTPN11, MAPK14, PTK2, VEGFA, CXCL10, CXCL11, IL6, BCL2, BAX, F2RL1, NFE2L2	105	1330	16650	5.96133	5.65944e-23	6.43119e-25	4.24434e-25
GOTERM_BP_FAT	GO:0007159~leukocyte cell-cell adhesion	35	32.7103	1.23035e-26	CALCA, IFNA1, SRC, HMGB1, TNF, AGER, PIK3CG, HSPD1, INS, ICAM1, CCL5, CCL2, FYN, B2M, CD55, ELANE, IL10, XBP1, TGFB1, RIPK3, IFNB1, IL18, PTPN11, IL2, SOD1, IL6, IFNG, CD209, IL1B, IL2RA, BCL2, BAX, F2RL1, ITGA5, EZR	105	491	16650	11.3035	5.99549e-23	6.73651e-25	4.44585e-25
GOTERM_BP_FAT	GO:0098602~single organism cell adhesion	41	38.3178	1.29774e-26	CALCA, IFNA1, SRC, HMGB1, PIK3CB, TNF, AGER, EGFR, PIK3CG, HSPD1, INS, ICAM1, CCL5, CCL2, FYN, B2M, CD55, ELANE, IL10, XBP1, TGFB1, RIPK3, IFNB1, PRKCD, IL18, FN1, PTPN11, ACTN4, IL2, PTK2, SOD1, IL6, IFNG, CD209, IL1B, IL2RA, BCL2, BAX, F2RL1, ITGA5, EZR	105	779	16650	8.34586	6.32388e-23	7.02654e-25	4.63725e-25
GOTERM_BP_FAT	GO:0008284~positive regulation of cell proliferation	42	39.2523	2.66897e-26	CSF2, HMGB1, PTGS2, FGF2, HIF1A, TNF, AGER, RELA, EGFR, AQP1, INS, CCL5, CXCR3, CCL2, GLUL, CD55, ELANE, CAMP, IL10, XBP1, JUN, TGFB1, MMP2, IL18, FN1, MIF, MAPK14, F2, MMP9, IL2, PTK2, VEGFA, IL3, CXCL10, IL6, IL5, IFNG, IL1B, IL2RA, IL9, BCL2, TLR4	105	849	16650	7.84452	1.30059e-22	1.42922e-24	9.43233e-25
GOTERM_BP_FAT	GO:0033993~response to lipid	42	39.2523	4.38546e-26	CSF2, CXCL8, SRC, HMGB1, PTGS2, TNF, RELA, EGFR, HSPD1, AQP1, ICAM1, AIFM1, CASP3, CCL5, MRC1, CCL2, CCR5, B2M, ELANE, CAMP, IL10, XBP1, JUN, TGFB1, NOS2, IFNB1, IL18, DEFA1, MIF, MAPK14, SOD2, NFKB1, CXCL10, CXCL11, IL6, IFNG, IRF3, IL1B, BCL2, TLR5, TLR4, TLR2	105	860	16650	7.74419	2.13703e-22	2.32286e-24	1.533e-24
GOTERM_BP_FAT	GO:0050708~regulation of protein secretion	32	29.9065	5.76441e-26	CRP, SRC, HMGB1, HIF1A, TNF, EGFR, HSPD1, INS, CCL5, GLUL, CAMP, IL10, XBP1, TGFB1, NOS2, FN1, PTPN11, MIF, MAPK14, IL2, IL1A, IL6, IL5, IFNG, IRF3, IL1B, F2RL1, GHRL, EZR, TLR5, TLR4, TLR2	105	392	16650	12.9446	2.809e-22	3.02043e-24	1.99337e-24
GOTERM_BP_FAT	GO:0044403~symbiosis, encompassing mutualism through parasitism	44	41.1215	1.04939e-25	IFITM3, CXCL8, IFNA1, SRC, TNF, RELA, HSPD1, AQP1, ICAM1, CCL5, MRC1, CCL4, CCL2, FYN, PLCG1, CCR5, B2M, CD55, ELANE, CAMP, MBL2, IL10, JUN, TGFB1, IFNB1, IFNGR1, ISG15, DEFA1, MAPK14, RHOA, CXCL10, IL6, IFNG, IRF3, CD209, IL2RA, ALB, BCL2, BAX, F2RL1, ITGA5, TP53, TLR3, HSPA1A	105	998	16650	6.99113	5.11367e-22	5.38281e-24	3.55245e-24
GOTERM_BP_FAT	GO:0044419~interspecies interaction between organisms	44	41.1215	1.04939e-25	IFITM3, CXCL8, IFNA1, SRC, TNF, RELA, HSPD1, AQP1, ICAM1, CCL5, MRC1, CCL4, CCL2, FYN, PLCG1, CCR5, B2M, CD55, ELANE, CAMP, MBL2, IL10, JUN, TGFB1, IFNB1, IFNGR1, ISG15, DEFA1, MAPK14, RHOA, CXCL10, IL6, IFNG, IRF3, CD209, IL2RA, ALB, BCL2, BAX, F2RL1, ITGA5, TP53, TLR3, HSPA1A	105	998	16650	6.99113	5.11367e-22	5.38281e-24	3.55245e-24
GOTERM_BP_FAT	GO:0043085~positive regulation of catalytic activity	52	48.5981	1.63142e-25	APP, CSF2, PIK3CB, HMGB1, FGF2, TNF, PIK3CG, ICAM1, AIFM1, CASP3, SFTPB, RIPK3, PRKCD, IL18, MIF, F2, RHOA, IFNG, IL1B, TLR4, TLR3, CALCA, SRC, HIF1A, AGER, EGFR, HSPD1, INS, PTPA, CCL5, CCL4, CCL2, FYN, PLCG1, ELANE, JUN, TGFB1, NOS2, FN1, PTPN11, MAPK14, IL2, PTK2, SOD1, VEGFA, IL3, IL5, IL2RA, BCL2, BAX, GHRL, HSPA1A	105	1559	16650	5.2891	7.94992e-22	8.22773e-24	5.43e-24
GOTERM_BP_FAT	GO:0016337~single organismal cell-cell adhesion	39	36.4486	1.63778e-25	CALCA, IFNA1, SRC, HMGB1, PIK3CB, TNF, AGER, EGFR, PIK3CG, HSPD1, INS, ICAM1, CCL5, CCL2, FYN, B2M, CD55, ELANE, IL10, XBP1, TGFB1, RIPK3, IFNB1, PRKCD, IL18, PTPN11, IL2, PTK2, SOD1, IL6, IFNG, CD209, IL1B, IL2RA, BCL2, BAX, F2RL1, ITGA5, EZR	105	725	16650	8.53005	7.9809e-22	8.22773e-24	5.43e-24
GOTERM_BP_FAT	GO:0016310~phosphorylation	60	56.0748	1.70998e-25	APP, CSF2, IFNA1, PIK3CB, HMGB1, FGF2, TNF, PIK3CG, ICAM1, CCR5, CAMP, RIPK3, PRKCD, IL18, MIF, F2, MMP9, RHOA, IL1A, IFNG, IL1B, ITGA5, EZR, TLR4, TP53, TLR3, TLR2, CALCA, SRC, HIF1A, AGER, EGFR, INS, CCL5, CCL4, CCL2, FYN, PLCG1, ELANE, JUN, XBP1, TGFB1, IFNB1, FN1, PTPN11, MAPK14, NFKB1, IL2, PTK2, SOD1, VEGFA, CXCL10, IL3, IL6, IL5, IL2RA, BCL2, BAX, F2RL1, GHRL	105	2229	16650	4.26841	8.33275e-22	8.50281e-24	5.61154e-24
GOTERM_BP_FAT	GO:0032103~positive regulation of response to external stimulus	28	26.1682	1.91607e-25	CXCL8, HMGB1, PTGS2, FGF2, TNF, AGER, EGFR, PIK3CG, HSPD1, CCL5, CXCR3, CCL4, CCL2, TGFB1, IL18, MIF, F2, IL2, VEGFA, CXCL10, CXCL11, IL6, IL1B, F2RL1, GHRL, TLR4, TLR3, TLR2	105	267	16650	16.6292	9.33702e-22	9.43134e-24	6.22433e-24
GOTERM_BP_FAT	GO:0051241~negative regulation of multicellular organismal process	44	41.1215	2.23068e-25	CRP, APP, CALCA, HMGB1, PTGS2, FGF2, HIF1A, TNF, AGER, EGFR, PIK3CG, KNG1, INS, PLAU, CXCR3, CCL2, B2M, ELANE, IL10, TGFB1, IFNB1, PRKCD, FN1, PTPN11, ISG15, F2, RHOA, IL2, PTK2, NFKB1, KLF2, SOD1, CXCL10, IL6, IFNG, IRF3, IL1B, BCL2, F2RL1, GHRL, EZR, TLR4, TLR3, NFE2L2	105	1017	16650	6.86051	1.08701e-21	1.08701e-23	7.17388e-24
GOTERM_BP_FAT	GO:0050778~positive regulation of immune response	38	35.514	2.78882e-25	SRC, HMGB1, PIK3CB, TNF, RELA, HSPD1, CCL5, FYN, PLCG1, B2M, CD55, ELANE, MBL2, XBP1, TGFB1, IFNB1, MMP2, PRKCD, IL18, MIF, IL2, PTK2, NFKB1, CLEC4A, IL6, IFNG, IRF3, CD209, IL1B, BCL2, BAX, F2RL1, EZR, TLR5, TLR4, TLR3, HSPA1A, TLR2	105	684	16650	8.80952	1.35899e-21	1.34554e-23	8.88003e-24
GOTERM_BP_FAT	GO:0032880~regulation of protein localization	43	40.1869	2.83041e-25	CRP, SRC, HMGB1, PTGS2, HIF1A, TNF, EGFR, HSPD1, INS, CCL5, CCL2, FYN, GLUL, CAMP, IL10, XBP1, TGFB1, NOS2, PRKCD, IL18, FN1, PTPN11, MIF, MAPK14, F2, RHOA, IL2, VEGFA, IL1A, IL6, IL5, IFNG, IRF3, IL1B, BCL2, F2RL1, GHRL, EZR, TLR5, TP53, TLR4, TLR3, TLR2	105	962	16650	7.08791	1.37926e-21	1.35222e-23	8.92412e-24
GOTERM_BP_FAT	GO:0051222~positive regulation of protein transport	33	30.8411	4.4111e-25	SRC, HMGB1, PTGS2, HIF1A, TNF, EGFR, HSPD1, INS, CCL2, GLUL, CAMP, IL10, XBP1, TGFB1, PRKCD, IL18, MIF, MAPK14, RHOA, IL2, IL1A, IL6, IL5, IFNG, IRF3, IL1B, F2RL1, GHRL, EZR, TP53, TLR4, TLR3, TLR2	105	460	16650	11.3758	2.14953e-21	2.08692e-23	1.37729e-23
GOTERM_BP_FAT	GO:0030155~regulation of cell adhesion	37	34.5794	4.50741e-25	CXCL8, SRC, HMGB1, PIK3CB, TNF, AGER, PIK3CG, KNG1, HSPD1, ICAM1, PLAU, CCL5, CCL2, FYN, CD55, ELANE, IL10, XBP1, TGFB1, RIPK3, IFNB1, PRKCD, IL18, FN1, PTPN11, ACTN4, IL2, PTK2, SOD1, VEGFA, IL6, IFNG, CD209, IL1B, IL2RA, BCL2, ITGA5	105	643	16650	9.12464	2.19646e-21	2.11198e-23	1.39383e-23
GOTERM_BP_FAT	GO:0051223~regulation of protein transport	39	36.4486	4.5694e-25	CRP, SRC, HMGB1, PTGS2, HIF1A, TNF, EGFR, HSPD1, INS, CCL5, CCL2, GLUL, CAMP, IL10, XBP1, TGFB1, NOS2, PRKCD, IL18, FN1, PTPN11, MIF, MAPK14, RHOA, IL2, IL1A, IL6, IL5, IFNG, IRF3, IL1B, F2RL1, GHRL, EZR, TLR5, TP53, TLR4, TLR3, TLR2	105	746	16650	8.28993	2.22667e-21	2.12064e-23	1.39954e-23
GOTERM_BP_FAT	GO:0045321~leukocyte activation	39	36.4486	4.79433e-25	CSF2, CXCL8, IFNA1, SRC, HMGB1, AGER, PIK3CG, HSPD1, INS, ICAM1, CCL5, CCL2, FYN, B2M, CD55, IL10, XBP1, JUN, TGFB1, RIPK3, IFNB1, PRKCD, IL18, PTPN11, MIF, IL2, SOD1, IL6, IL5, IFNG, CD209, IL1B, IL2RA, BCL2, BAX, F2RL1, TLR4, TLR3, TLR2	105	747	16650	8.27883	2.33628e-21	2.20404e-23	1.45458e-23
GOTERM_BP_FAT	GO:0065009~regulation of molecular function	66	61.6822	4.91161e-25	APP, CSF2, PIK3CB, HMGB1, FGF2, TNF, PIK3CG, ICAM1, AQP1, AIFM1, PLAU, CASP3, B2M, IL10, SFTPB, RIPK3, PRKCD, IL18, MIF, ACTN4, F2, MMP9, RHOA, IFNG, IL1B, TLR4, TP53, TLR3, TLR2, CALCA, SRC, HIF1A, AGER, EGFR, RELA, KNG1, HSPD1, INS, PTPA, CCL5, CCL4, CCL2, FYN, PLCG1, ELANE, JUN, TGFB1, NOS2, FN1, PTPN11, MAPK14, SOD2, NFKB1, IL2, PTK2, SOD1, VEGFA, CXCL10, IL3, IL6, IL5, IL2RA, BCL2, BAX, GHRL…	105	2863	16650	3.65551	2.39343e-21	2.23685e-23	1.47624e-23
GOTERM_BP_FAT	GO:0043066~negative regulation of apoptotic process	40	37.3832	1.0236e-24	CSF2, SRC, HIF1A, TNF, RELA, EGFR, PIK3CG, HSPD1, AQP1, INS, ICAM1, CASP3, CCL5, CXCR3, CCL2, FYN, IL10, XBP1, JUN, PRKCD, MIF, SOD2, MMP9, IL2, PTK2, NFKB1, SOD1, VEGFA, IL1A, IL6, IL1B, ALB, BCL2, BAX, GHRL, ITGA5, CRYAA, TP53, HSPA1A, NFE2L2	105	818	16650	7.7541	4.98799e-21	4.61851e-23	3.04805e-23
GOTERM_BP_FAT	GO:1904951~positive regulation of establishment of protein localization	34	31.7757	1.07201e-24	SRC, HMGB1, PTGS2, HIF1A, TNF, EGFR, HSPD1, INS, CCL2, GLUL, CAMP, IL10, XBP1, TGFB1, PRKCD, IL18, MIF, MAPK14, RHOA, IL2, IL1A, IL6, IL5, IFNG, IRF3, IL1B, BCL2, F2RL1, GHRL, EZR, TP53, TLR4, TLR3, TLR2	105	517	16650	10.4283	5.2239e-21	4.79257e-23	3.16292e-23
GOTERM_BP_FAT	GO:0070201~regulation of establishment of protein localization	40	37.3832	1.1192e-24	CRP, SRC, HMGB1, PTGS2, HIF1A, TNF, EGFR, HSPD1, INS, CCL5, CCL2, GLUL, CAMP, IL10, XBP1, TGFB1, NOS2, PRKCD, IL18, FN1, PTPN11, MIF, MAPK14, RHOA, IL2, IL1A, IL6, IL5, IFNG, IRF3, IL1B, BCL2, F2RL1, GHRL, EZR, TLR5, TP53, TLR4, TLR3, TLR2	105	820	16650	7.73519	5.45386e-21	4.95806e-23	3.27213e-23
GOTERM_BP_FAT	GO:0040012~regulation of locomotion	39	36.4486	1.29383e-24	CXCL8, SRC, HMGB1, PTGS2, FGF2, HIF1A, TNF, AGER, EGFR, INS, ICAM1, PLAU, CCL5, CXCR3, CCL4, CCL2, PLCG1, ELANE, XBP1, JUN, TGFB1, RIPK3, FN1, ACTN4, MAPK14, MMP9, RHOA, PTK2, VEGFA, IL1A, CXCL10, CXCL11, IL6, IFNG, BCL2, F2RL1, GHRL, ITGA5, NFE2L2	105	768	16650	8.05246	6.30484e-21	5.68003e-23	3.74861e-23
GOTERM_BP_FAT	GO:0043069~negative regulation of programmed cell death	40	37.3832	1.66765e-24	CSF2, SRC, HIF1A, TNF, RELA, EGFR, PIK3CG, HSPD1, AQP1, INS, ICAM1, CASP3, CCL5, CXCR3, CCL2, FYN, IL10, XBP1, JUN, PRKCD, MIF, SOD2, MMP9, IL2, PTK2, NFKB1, SOD1, VEGFA, IL1A, IL6, IL1B, ALB, BCL2, BAX, GHRL, ITGA5, CRYAA, TP53, HSPA1A, NFE2L2	105	829	16650	7.65121	8.12648e-21	7.25578e-23	4.78855e-23
GOTERM_BP_FAT	GO:0060548~negative regulation of cell death	41	38.3178	2.59792e-24	CSF2, SRC, FGF2, HIF1A, TNF, RELA, EGFR, PIK3CG, HSPD1, AQP1, INS, ICAM1, CASP3, CCL5, CXCR3, CCL2, FYN, IL10, XBP1, JUN, PRKCD, MIF, SOD2, MMP9, IL2, PTK2, NFKB1, SOD1, VEGFA, IL1A, IL6, IL1B, ALB, BCL2, BAX, GHRL, ITGA5, CRYAA, TP53, HSPA1A, NFE2L2	105	897	16650	7.24797	1.26596e-20	1.12032e-22	7.39372e-23
GOTERM_BP_FAT	GO:0050790~regulation of catalytic activity	60	56.0748	3.21829e-24	APP, CSF2, PIK3CB, HMGB1, FGF2, TNF, PIK3CG, ICAM1, AQP1, AIFM1, CASP3, SFTPB, RIPK3, PRKCD, IL18, MIF, F2, MMP9, RHOA, IFNG, IL1B, TLR4, TP53, TLR3, CALCA, SRC, HIF1A, AGER, EGFR, KNG1, HSPD1, INS, PTPA, CCL5, CCL4, CCL2, FYN, PLCG1, ELANE, JUN, TGFB1, NOS2, FN1, PTPN11, MAPK14, SOD2, NFKB1, IL2, PTK2, SOD1, VEGFA, CXCL10, IL3, IL6, IL5, IL2RA, BCL2, BAX, GHRL, HSPA1A	105	2357	16650	4.03661	1.56827e-20	1.37568e-22	9.07896e-23
GOTERM_BP_FAT	GO:0030334~regulation of cell migration	37	34.5794	3.91291e-24	CXCL8, SRC, HMGB1, PTGS2, FGF2, HIF1A, TNF, EGFR, INS, ICAM1, PLAU, CCL5, CXCR3, CCL4, CCL2, PLCG1, ELANE, XBP1, JUN, TGFB1, RIPK3, FN1, ACTN4, MAPK14, MMP9, RHOA, PTK2, VEGFA, IL1A, CXCL10, CXCL11, IL6, IFNG, BCL2, F2RL1, ITGA5, NFE2L2	105	685	16650	8.56517	1.90676e-20	1.65805e-22	1.09425e-22
GOTERM_BP_FAT	GO:0030097~hemopoiesis	38	35.514	4.17026e-24	CALCA, CSF2, IFNA1, SRC, HMGB1, HIF1A, TNF, AGER, SGPL1, CASP3, B2M, IL10, XBP1, JUN, TGFB1, RIPK3, IFNB1, IL18, PTPN11, ISG15, MAPK14, SOD2, MMP9, IL2, KLF2, SOD1, VEGFA, IL3, IL6, IL5, IFNG, IL2RA, BCL2, BAX, F2RL1, TLR4, TLR3, NFE2L2	105	739	16650	8.15388	2.03217e-20	1.75187e-22	1.15617e-22
GOTERM_BP_FAT	GO:0006796~phosphate-containing compound metabolic process	67	62.6168	4.47822e-24	APP, CSF2, IFNA1, PIK3CB, HMGB1, FGF2, TNF, PIK3CG, ICAM1, AQP1, CCR5, CAMP, RIPK3, PRKCD, IL18, MIF, F2, MMP9, RHOA, IL1A, IFNG, IL1B, ITGA5, EZR, TLR4, TP53, TLR3, TLR2, CALCA, SRC, HIF1A, AGER, EGFR, INS, PTPA, CXCR3, CCL5, CCL4, CCL2, FYN, PLCG1, ELANE, JUN, XBP1, TGFB1, NOS2, IFNB1, FN1, PTPN11, MAPK14, NFKB1, IL2, PTK2, SOD1, VEGFA, CXCL10, IL3, PTPRB, CXCL11, IL6, IL5, IL2RA, BCL2, BAX, F2…	105	3083	16650	3.44609	2.18223e-20	1.86516e-22	1.23094e-22
GOTERM_BP_FAT	GO:0006793~phosphorus metabolic process	67	62.6168	5.01325e-24	APP, CSF2, IFNA1, PIK3CB, HMGB1, FGF2, TNF, PIK3CG, ICAM1, AQP1, CCR5, CAMP, RIPK3, PRKCD, IL18, MIF, F2, MMP9, RHOA, IL1A, IFNG, IL1B, ITGA5, EZR, TLR4, TP53, TLR3, TLR2, CALCA, SRC, HIF1A, AGER, EGFR, INS, PTPA, CXCR3, CCL5, CCL4, CCL2, FYN, PLCG1, ELANE, JUN, XBP1, TGFB1, NOS2, IFNB1, FN1, PTPN11, MAPK14, NFKB1, IL2, PTK2, SOD1, VEGFA, CXCL10, IL3, PTPRB, CXCL11, IL6, IL5, IL2RA, BCL2, BAX, F2…	105	3089	16650	3.43939	2.44296e-20	2.0703e-22	1.36632e-22
GOTERM_BP_FAT	GO:0071396~cellular response to lipid	33	30.8411	1.0079e-23	CSF2, CXCL8, SRC, TNF, RELA, EGFR, AQP1, ICAM1, AIFM1, CCL5, MRC1, CCL2, CCR5, B2M, CAMP, IL10, XBP1, TGFB1, NOS2, IFNB1, IL18, DEFA1, MIF, MAPK14, NFKB1, CXCL10, IL6, IFNG, IRF3, IL1B, TLR5, TLR4, TLR2	105	509	16650	10.2807	4.91147e-20	4.12729e-22	2.72386e-22
GOTERM_BP_FAT	GO:0006928~movement of cell or subcellular component	53	49.5327	1.25429e-23	APP, CXCL8, PIK3CB, HMGB1, FGF2, TNF, PIK3CG, ICAM1, PLAU, CCR5, IL10, RIPK3, PRKCD, MIF, ACTN4, F2, MMP9, RHOA, IL1A, IFNG, IL1B, ITGA5, EZR, CALCA, SRC, PTGS2, HIF1A, EGFR, INS, SGPL1, CXCR3, CCL5, CCL4, CCL2, FYN, PLCG1, ELANE, JUN, XBP1, TGFB1, FN1, PTPN11, MAPK14, PTK2, SOD1, VEGFA, CXCL10, CXCL11, IL6, BCL2, BAX, F2RL1, NFE2L2	105	1795	16650	4.68205	6.11214e-20	5.09345e-22	3.36149e-22
GOTERM_BP_FAT	GO:0009306~protein secretion	32	29.9065	1.29789e-23	CRP, SRC, HMGB1, HIF1A, TNF, EGFR, HSPD1, INS, CCL5, GLUL, CAMP, IL10, XBP1, TGFB1, NOS2, FN1, PTPN11, MIF, MAPK14, IL2, IL1A, IL6, IL5, IFNG, IRF3, IL1B, F2RL1, GHRL, EZR, TLR5, TLR4, TLR2	105	469	16650	10.8194	6.32462e-20	5.22696e-22	3.4496e-22
GOTERM_BP_FAT	GO:0002520~immune system development	39	36.4486	1.39214e-23	CALCA, CSF2, IFNA1, SRC, HMGB1, HIF1A, TNF, AGER, HSPD1, SGPL1, CASP3, B2M, IL10, XBP1, JUN, TGFB1, RIPK3, IFNB1, IL18, PTPN11, ISG15, MAPK14, SOD2, MMP9, IL2, KLF2, SOD1, VEGFA, IL3, IL6, IL5, IFNG, IL2RA, BCL2, BAX, F2RL1, TLR4, TLR3, NFE2L2	105	821	16650	7.53263	6.78389e-20	5.56057e-22	3.66977e-22
GOTERM_BP_FAT	GO:0070661~leukocyte proliferation	27	25.2336	1.54191e-23	IFNA1, HMGB1, AGER, PIK3CG, HSPD1, CCL5, FYN, CD55, IL10, TGFB1, RIPK3, IFNB1, PRKCD, IL18, MIF, IL2, IL3, IL6, IL5, IFNG, CD209, IL1B, IL2RA, BCL2, BAX, F2RL1, TLR4	105	280	16650	15.2908	7.51373e-20	6.10872e-22	4.03153e-22
GOTERM_BP_FAT	GO:0048534~hematopoietic or lymphoid organ development	38	35.514	2.48473e-23	CALCA, CSF2, IFNA1, SRC, HMGB1, HIF1A, TNF, AGER, SGPL1, CASP3, B2M, IL10, XBP1, JUN, TGFB1, RIPK3, IFNB1, IL18, PTPN11, ISG15, MAPK14, SOD2, MMP9, IL2, KLF2, SOD1, VEGFA, IL3, IL6, IL5, IFNG, IL2RA, BCL2, BAX, F2RL1, TLR4, TLR3, NFE2L2	105	778	16650	7.74513	1.21081e-19	9.76459e-22	6.44427e-22
GOTERM_BP_FAT	GO:0031349~positive regulation of defense response	30	28.0374	3.92154e-23	SRC, HMGB1, PTGS2, TNF, RELA, EGFR, PIK3CG, HSPD1, CCL5, CCL4, CCL2, FYN, TGFB1, IFNB1, MMP2, PRKCD, IL18, IL2, NFKB1, CLEC4A, IL6, IRF3, CD209, IL1B, F2RL1, TLR5, TLR4, TLR3, HSPA1A, TLR2	105	402	16650	11.8337	1.91097e-19	1.52877e-21	1.00893e-21
GOTERM_BP_FAT	GO:2000145~regulation of cell motility	37	34.5794	4.45849e-23	CXCL8, SRC, HMGB1, PTGS2, FGF2, HIF1A, TNF, EGFR, INS, ICAM1, PLAU, CCL5, CXCR3, CCL4, CCL2, PLCG1, ELANE, XBP1, JUN, TGFB1, RIPK3, FN1, ACTN4, MAPK14, MMP9, RHOA, PTK2, VEGFA, IL1A, CXCL10, CXCL11, IL6, IFNG, BCL2, F2RL1, ITGA5, NFE2L2	105	736	16650	7.97166	2.17262e-19	1.7243e-21	1.13798e-21
GOTERM_BP_FAT	GO:0050707~regulation of cytokine secretion	22	20.5607	6.9639e-23	IL10, CRP, XBP1, SRC, FN1, HMGB1, MIF, MAPK14, TNF, HSPD1, INS, IL1A, IL6, IFNG, IRF3, IL1B, F2RL1, EZR, TLR5, TLR4, CAMP, TLR2	105	150	16650	23.2571	3.39351e-19	2.67206e-21	1.76346e-21
GOTERM_BP_FAT	GO:0009611~response to wounding	35	32.7103	1.08662e-22	IFNA1, SRC, HMGB1, PIK3CB, FGF2, HIF1A, AGER, EGFR, PIK3CG, KNG1, INS, PLAU, CASP3, CCL2, FYN, XBP1, JUN, TGFB1, IFNB1, PRKCD, FN1, PTPN11, MAPK14, F2, SOD2, RHOA, SOD1, IL1A, IL6, BCL2, BAX, F2RL1, ITGA5, TLR4, NFE2L2	105	649	16650	8.55162	5.2951e-19	4.1368e-21	2.73014e-21
GOTERM_BP_FAT	GO:0001944~vasculature development	34	31.7757	1.96155e-22	CALCA, CXCL8, HMGB1, PIK3CB, PTGS2, FGF2, HIF1A, PIK3CG, AQP1, SGPL1, CXCR3, CCL2, PLCG1, CAMP, XBP1, JUN, TGFB1, MMP2, IL18, FN1, MAPK14, RHOA, PTK2, VEGFA, IL1A, CXCL10, PTPRB, IL6, IFNG, IL1B, BAX, GHRL, ITGA5, NFE2L2	105	610	16650	8.83841	9.55864e-19	7.4098e-21	4.89019e-21
GOTERM_BP_FAT	GO:0050714~positive regulation of protein secretion	24	22.4299	2.57519e-22	IL10, XBP1, TGFB1, SRC, HMGB1, MIF, MAPK14, HIF1A, TNF, EGFR, IL2, HSPD1, INS, IL1A, IL6, IL5, IFNG, IRF3, IL1B, F2RL1, GHRL, EZR, GLUL, CAMP	105	214	16650	17.7837	1.25489e-18	9.65299e-21	6.37062e-21
GOTERM_BP_FAT	GO:1901698~response to nitrogen compound	39	36.4486	2.91744e-22	APP, IFNA1, SRC, PTGS2, TNF, RELA, EGFR, PIK3CG, HSPD1, AQP1, INS, ICAM1, AIFM1, CASP3, CCL2, FYN, CD55, CAMP, IL10, XBP1, JUN, TGFB1, IFNB1, MMP2, PRKCD, PTPN11, MAPK14, PTK2, NFKB1, KLF2, SOD1, IL6, IRF3, IL1B, BCL2, GHRL, EZR, TLR3, TLR2	105	895	16650	6.90982	1.42167e-18	1.08524e-20	7.16219e-21
GOTERM_BP_FAT	GO:0050727~regulation of inflammatory response	27	25.2336	2.94754e-22	PTGS2, TNF, AGER, RELA, EGFR, PIK3CG, HSPD1, INS, CCL5, CCL4, CCL2, CD55, ELANE, IL10, NOS2, PRKCD, IL18, MAPK14, IL2, NFKB1, IL6, IL1B, IL2RA, GHRL, TLR4, TLR3, TLR2	105	314	16650	13.6351	1.43634e-18	1.08813e-20	7.18128e-21
GOTERM_BP_FAT	GO:0009628~response to abiotic stimulus	41	38.3178	4.12103e-22	APP, CALCA, SRC, PTGS2, HIF1A, TNF, AGER, RELA, EGFR, HSPD1, AQP1, ICAM1, AIFM1, PLAU, CASP3, CCL2, FYN, ELANE, JUN, TGFB1, NOS2, MMP2, ACTN4, MAPK14, SOD2, NFKB1, SOD1, VEGFA, IL1A, CXCL10, IL6, IL1B, BCL2, BAX, TLR5, TP53, TLR4, TLR3, HSPA1A, NFE2L2, TLR2	105	1029	16650	6.3182	2.00818e-18	1.50991e-20	9.96483e-21
GOTERM_BP_FAT	GO:0046903~secretion	42	39.2523	4.65868e-22	CRP, APP, CSF2, SRC, HMGB1, AQP5, HIF1A, TNF, EGFR, PIK3CG, KNG1, HSPD1, AQP1, INS, CCL5, GLUL, CAMP, IL10, XBP1, TGFB1, NOS2, FN1, PTPN11, ACTN4, MIF, MAPK14, IL2, SOD1, VEGFA, IL1A, IL6, IL5, IFNG, IRF3, IL1B, ALB, F2RL1, GHRL, EZR, TLR5, TLR4, TLR2	105	1098	16650	6.06557	2.27017e-18	1.69416e-20	1.11808e-20
GOTERM_BP_FAT	GO:0044764~multi-organism cellular process	40	37.3832	5.43743e-22	IFITM3, CXCL8, IFNA1, SRC, TNF, RELA, HSPD1, ICAM1, CCL5, MRC1, CCL4, CCL2, FYN, PLCG1, CCR5, B2M, CD55, MBL2, JUN, TGFB1, IFNB1, IFNGR1, ISG15, DEFA1, MAPK14, RHOA, CXCL10, IL6, IFNG, IRF3, CD209, IL2RA, ALB, BCL2, BAX, F2RL1, ITGA5, TP53, TLR3, HSPA1A	105	973	16650	6.51887	2.64966e-18	1.96271e-20	1.29532e-20
GOTERM_BP_FAT	GO:0050663~cytokine secretion	22	20.5607	5.49338e-22	IL10, CRP, XBP1, NOS2, SRC, FN1, HMGB1, MIF, MAPK14, TNF, HSPD1, INS, IL1A, IL6, IFNG, IRF3, IL1B, F2RL1, EZR, TLR4, CAMP, TLR2	105	165	16650	21.1429	2.67692e-18	1.96833e-20	1.29902e-20
GOTERM_BP_FAT	GO:0070489~T cell aggregation	30	28.0374	7.21779e-22	IFNA1, SRC, HMGB1, AGER, PIK3CG, HSPD1, INS, ICAM1, CCL5, CCL2, FYN, B2M, CD55, IL10, XBP1, TGFB1, RIPK3, IFNB1, IL18, PTPN11, IL2, SOD1, IL6, IFNG, CD209, IL1B, IL2RA, BCL2, BAX, F2RL1	105	446	16650	10.6662	3.51723e-18	2.54872e-20	1.68206e-20
GOTERM_BP_FAT	GO:0042110~T cell activation	30	28.0374	7.21779e-22	IFNA1, SRC, HMGB1, AGER, PIK3CG, HSPD1, INS, ICAM1, CCL5, CCL2, FYN, B2M, CD55, IL10, XBP1, TGFB1, RIPK3, IFNB1, IL18, PTPN11, IL2, SOD1, IL6, IFNG, CD209, IL1B, IL2RA, BCL2, BAX, F2RL1	105	446	16650	10.6662	3.51723e-18	2.54872e-20	1.68206e-20
GOTERM_BP_FAT	GO:0048514~blood vessel morphogenesis	31	28.972	7.45083e-22	CXCL8, HMGB1, PIK3CB, PTGS2, FGF2, HIF1A, PIK3CG, AQP1, SGPL1, CXCR3, CCL2, PLCG1, CAMP, XBP1, JUN, TGFB1, MMP2, IL18, FN1, MAPK14, RHOA, PTK2, VEGFA, IL1A, CXCL10, PTPRB, IL1B, BAX, GHRL, ITGA5, NFE2L2	105	491	16650	10.0116	3.63079e-18	2.61208e-20	1.72388e-20
GOTERM_BP_FAT	GO:0071593~lymphocyte aggregation	30	28.0374	7.68282e-22	IFNA1, SRC, HMGB1, AGER, PIK3CG, HSPD1, INS, ICAM1, CCL5, CCL2, FYN, B2M, CD55, IL10, XBP1, TGFB1, RIPK3, IFNB1, IL18, PTPN11, IL2, SOD1, IL6, IFNG, CD209, IL1B, IL2RA, BCL2, BAX, F2RL1	105	447	16650	10.6424	3.74384e-18	2.67417e-20	1.76485e-20
GOTERM_BP_FAT	GO:0051270~regulation of cellular component movement	37	34.5794	7.95135e-22	CXCL8, SRC, HMGB1, PTGS2, FGF2, HIF1A, TNF, EGFR, INS, ICAM1, PLAU, CCL5, CXCR3, CCL4, CCL2, PLCG1, ELANE, XBP1, JUN, TGFB1, RIPK3, FN1, ACTN4, MAPK14, MMP9, RHOA, PTK2, VEGFA, IL1A, CXCL10, CXCL11, IL6, IFNG, BCL2, F2RL1, ITGA5, NFE2L2	105	802	16650	7.31564	3.87469e-18	2.74801e-20	1.81359e-20
GOTERM_BP_FAT	GO:0046649~lymphocyte activation	34	31.7757	1.0093e-21	IFNA1, SRC, HMGB1, AGER, PIK3CG, HSPD1, INS, ICAM1, CCL5, CCL2, FYN, B2M, CD55, IL10, XBP1, TGFB1, RIPK3, IFNB1, PRKCD, IL18, PTPN11, MIF, IL2, SOD1, IL6, IL5, IFNG, CD209, IL1B, IL2RA, BCL2, BAX, F2RL1, TLR4	105	643	16650	8.3848	4.91834e-18	3.46362e-20	2.28586e-20
GOTERM_BP_FAT	GO:0070486~leukocyte aggregation	30	28.0374	1.18431e-21	IFNA1, SRC, HMGB1, AGER, PIK3CG, HSPD1, INS, ICAM1, CCL5, CCL2, FYN, B2M, CD55, IL10, XBP1, TGFB1, RIPK3, IFNB1, IL18, PTPN11, IL2, SOD1, IL6, IFNG, CD209, IL1B, IL2RA, BCL2, BAX, F2RL1	105	454	16650	10.4783	5.77115e-18	4.03577e-20	2.66346e-20
GOTERM_BP_FAT	GO:0001525~angiogenesis	29	27.1028	1.34344e-21	CXCL8, HMGB1, PIK3CB, PTGS2, FGF2, HIF1A, PIK3CG, AQP1, CXCR3, CCL2, PLCG1, CAMP, XBP1, JUN, MMP2, IL18, FN1, MAPK14, RHOA, PTK2, VEGFA, IL1A, CXCL10, PTPRB, IL1B, BAX, GHRL, ITGA5, NFE2L2	105	413	16650	11.1346	6.5466e-18	4.54625e-20	3.00036e-20
GOTERM_BP_FAT	GO:0046651~lymphocyte proliferation	25	23.3645	1.4565e-21	IFNA1, HMGB1, AGER, PIK3CG, HSPD1, CCL5, FYN, CD55, IL10, TGFB1, RIPK3, IFNB1, PRKCD, IL18, MIF, IL2, IL6, IL5, IFNG, CD209, IL1B, IL2RA, BCL2, BAX, TLR4	105	263	16650	15.0733	7.09753e-18	4.89485e-20	3.23042e-20
GOTERM_BP_FAT	GO:0006935~chemotaxis	32	29.9065	1.62573e-21	APP, CALCA, CXCL8, HMGB1, PIK3CB, FGF2, AGER, PIK3CG, PLAU, CCL5, CXCR3, CCL4, CCL2, FYN, CCR5, ELANE, IL10, TGFB1, PRKCD, DEFA1, MIF, MAPK14, RHOA, PTK2, VEGFA, CXCL10, CXCL11, IL6, IFNG, IL1B, F2RL1, EZR	105	552	16650	9.19255	7.9222e-18	5.42617e-20	3.58107e-20
GOTERM_BP_FAT	GO:0042330~taxis	32	29.9065	1.71447e-21	APP, CALCA, CXCL8, HMGB1, PIK3CB, FGF2, AGER, PIK3CG, PLAU, CCL5, CXCR3, CCL4, CCL2, FYN, CCR5, ELANE, IL10, TGFB1, PRKCD, DEFA1, MIF, MAPK14, RHOA, PTK2, VEGFA, CXCL10, CXCL11, IL6, IFNG, IL1B, F2RL1, EZR	105	553	16650	9.17592	8.35462e-18	5.68341e-20	3.75084e-20
GOTERM_BP_FAT	GO:0032943~mononuclear cell proliferation	25	23.3645	1.74454e-21	IFNA1, HMGB1, AGER, PIK3CG, HSPD1, CCL5, FYN, CD55, IL10, TGFB1, RIPK3, IFNB1, PRKCD, IL18, MIF, IL2, IL6, IL5, IFNG, CD209, IL1B, IL2RA, BCL2, BAX, TLR4	105	265	16650	14.9596	8.50115e-18	5.74402e-20	3.79084e-20
GOTERM_BP_FAT	GO:0002521~leukocyte differentiation	30	28.0374	3.91895e-21	CALCA, CSF2, IFNA1, SRC, HMGB1, TNF, AGER, B2M, IL10, XBP1, JUN, TGFB1, RIPK3, IFNB1, IL18, MAPK14, MMP9, IL2, SOD1, VEGFA, IL3, IL6, IL5, IFNG, IL2RA, BCL2, BAX, F2RL1, TLR4, TLR3	105	474	16650	10.0362	1.90971e-17	1.28168e-19	8.45863e-20
GOTERM_BP_FAT	GO:0032940~secretion by cell	39	36.4486	4.17727e-21	CRP, APP, SRC, HMGB1, HIF1A, TNF, EGFR, PIK3CG, KNG1, HSPD1, INS, CCL5, GLUL, CAMP, IL10, XBP1, TGFB1, NOS2, FN1, PTPN11, ACTN4, MIF, MAPK14, IL2, SOD1, VEGFA, IL1A, IL6, IL5, IFNG, IRF3, IL1B, ALB, F2RL1, GHRL, EZR, TLR5, TLR4, TLR2	105	966	16650	6.40195	2.03558e-17	1.34807e-19	8.89676e-20
GOTERM_BP_FAT	GO:0016032~viral process	39	36.4486	4.17727e-21	IFITM3, CXCL8, IFNA1, SRC, TNF, RELA, HSPD1, ICAM1, CCL5, MRC1, CCL4, CCL2, FYN, PLCG1, CCR5, B2M, CD55, MBL2, JUN, TGFB1, IFNB1, IFNGR1, ISG15, DEFA1, MAPK14, RHOA, CXCL10, IL6, IFNG, IRF3, CD209, IL2RA, BCL2, BAX, F2RL1, ITGA5, TP53, TLR3, HSPA1A	105	966	16650	6.40195	2.03558e-17	1.34807e-19	8.89676e-20
GOTERM_BP_FAT	GO:0007155~cell adhesion	49	45.7944	4.73039e-21	APP, IFNA1, PIK3CB, HMGB1, TNF, PIK3CG, ICAM1, PLAU, B2M, IL10, RIPK3, PRKCD, IL18, ACTN4, CLEC4A, IFNG, IL1B, ITGA5, EZR, CALCA, SRC, AGER, EGFR, KNG1, HSPD1, INS, CXCR3, CCL5, CCL4, CCL2, FYN, CD55, ELANE, XBP1, TGFB1, IFNB1, FN1, PTPN11, IL2, PTK2, SOD1, VEGFA, IL6, CD209, IL2RA, BCL2, BAX, F2RL1, HSPA1A	105	1699	16650	4.57328	2.30512e-17	1.51653e-19	1.00085e-19
GOTERM_BP_FAT	GO:0022610~biological adhesion	49	45.7944	5.49084e-21	APP, IFNA1, PIK3CB, HMGB1, TNF, PIK3CG, ICAM1, PLAU, B2M, IL10, RIPK3, PRKCD, IL18, ACTN4, CLEC4A, IFNG, IL1B, ITGA5, EZR, CALCA, SRC, AGER, EGFR, KNG1, HSPD1, INS, CXCR3, CCL5, CCL4, CCL2, FYN, CD55, ELANE, XBP1, TGFB1, IFNB1, FN1, PTPN11, IL2, PTK2, SOD1, VEGFA, IL6, CD209, IL2RA, BCL2, BAX, F2RL1, HSPA1A	105	1705	16650	4.55718	2.67569e-17	1.74882e-19	1.15415e-19
GOTERM_BP_FAT	GO:0001568~blood vessel development	32	29.9065	5.65516e-21	CXCL8, HMGB1, PIK3CB, PTGS2, FGF2, HIF1A, PIK3CG, AQP1, SGPL1, CXCR3, CCL2, PLCG1, CAMP, XBP1, JUN, TGFB1, MMP2, IL18, FN1, MAPK14, RHOA, PTK2, VEGFA, IL1A, CXCL10, PTPRB, IFNG, IL1B, BAX, GHRL, ITGA5, NFE2L2	105	576	16650	8.80952	2.75576e-17	1.78945e-19	1.18097e-19
GOTERM_BP_FAT	GO:0097190~apoptotic signaling pathway	32	29.9065	8.04629e-21	CSF2, SRC, HIF1A, TNF, RELA, INS, ICAM1, SGPL1, AIFM1, CASP3, FYN, XBP1, JUN, TGFB1, RIPK3, IFNB1, PRKCD, MIF, SOD2, MMP9, IL2, SOD1, IL1A, IFNG, IL1B, BCL2, BAX, TP53, TLR4, TLR3, HSPA1A, NFE2L2	105	583	16650	8.70375	3.92096e-17	2.52965e-19	1.66948e-19
GOTERM_BP_FAT	GO:2000026~regulation of multicellular organismal development	49	45.7944	8.14653e-21	APP, CXCL8, HMGB1, FGF2, TNF, AQP1, B2M, CAMP, IL10, IL18, F2, RHOA, IL1A, IFNG, IL1B, ITGA5, TLR4, TLR3, TLR2, CALCA, PTGS2, HIF1A, AGER, EGFR, RELA, CXCR3, CCL2, FYN, PLCG1, JUN, XBP1, TGFB1, IFNB1, FN1, ISG15, MAPK14, IL2, PTK2, SOD1, VEGFA, CXCL10, IL3, IL6, IL5, IL2RA, BCL2, BAX, GHRL, NFE2L2	105	1721	16650	4.51482	3.96981e-17	2.54475e-19	1.67944e-19
GOTERM_BP_FAT	GO:0098542~defense response to other organism	30	28.0374	1.22735e-20	IFITM3, CRP, APP, CALCA, IFNA1, TNF, RELA, FYN, B2M, ELANE, CAMP, MBL2, IL10, TGFB1, NOS2, IFNB1, PRKCD, ISG15, DEFA1, CXCL10, IL6, IFNG, IRF3, IL2RA, BCL2, F2RL1, TLR5, TLR4, TLR3, TLR2	105	494	16650	9.62984	5.98089e-17	3.80948e-19	2.51412e-19
GOTERM_BP_FAT	GO:0033674~positive regulation of kinase activity	30	28.0374	2.25002e-20	CALCA, SRC, HMGB1, PIK3CB, FGF2, TNF, AGER, EGFR, PIK3CG, INS, CCL5, PLCG1, ELANE, TGFB1, RIPK3, PRKCD, IL18, PTPN11, MIF, MAPK14, F2, RHOA, PTK2, SOD1, VEGFA, IL1B, BAX, GHRL, TLR4, TLR3	105	505	16650	9.42008	1.09643e-16	6.93945e-19	4.57978e-19
GOTERM_BP_FAT	GO:0019221~cytokine-mediated signaling pathway	31	28.972	2.31583e-20	IFITM3, CXCL8, IFNA1, HIF1A, TNF, RELA, ICAM1, CCL5, CXCR3, CCL4, CCL2, CCR5, B2M, IFNB1, IFNGR1, PRKCD, IL18, PTPN11, ISG15, IL1A, IL3, CXCL10, CXCL11, IL6, IL5, IFNG, IRF3, IL1B, IL2RA, F2RL1, HSPA1A	105	554	16650	8.87313	1.1285e-16	7.09751e-19	4.6841e-19
GOTERM_BP_FAT	GO:0048585~negative regulation of response to stimulus	44	41.1215	2.4895e-20	CALCA, CSF2, CXCL8, SRC, FGF2, HIF1A, TNF, AGER, RELA, EGFR, KNG1, INS, ICAM1, PLAU, CCL5, CCL2, FYN, CD55, ELANE, IL10, XBP1, TGFB1, IFNB1, PRKCD, MIF, MAPK14, F2, SOD2, MMP9, IL2, NFKB1, IL1A, IL6, IL1B, IL2RA, BCL2, BAX, F2RL1, GHRL, EZR, TLR4, TLR3, HSPA1A, NFE2L2	105	1369	16650	5.09653	1.21313e-16	7.58209e-19	5.0039e-19
GOTERM_BP_FAT	GO:0045860~positive regulation of protein kinase activity	29	27.1028	4.30855e-20	CALCA, SRC, HMGB1, PIK3CB, FGF2, TNF, AGER, EGFR, PIK3CG, INS, CCL5, PLCG1, ELANE, TGFB1, RIPK3, PRKCD, IL18, PTPN11, MIF, MAPK14, RHOA, PTK2, SOD1, VEGFA, IL1B, BAX, GHRL, TLR4, TLR3	105	470	16650	9.78419	2.09956e-16	1.30407e-18	8.6064e-19
GOTERM_BP_FAT	GO:0010243~response to organonitrogen compound	35	32.7103	5.2652e-20	APP, SRC, PTGS2, TNF, RELA, EGFR, PIK3CG, HSPD1, AQP1, INS, ICAM1, AIFM1, CASP3, CCL2, FYN, CD55, CAMP, IL10, XBP1, JUN, TGFB1, MMP2, PRKCD, PTPN11, MAPK14, PTK2, NFKB1, KLF2, SOD1, IL6, IL1B, BCL2, GHRL, EZR, TLR2	105	789	16650	7.03422	2.56573e-16	1.58379e-18	1.04524e-18
GOTERM_BP_FAT	GO:0043408~regulation of MAPK cascade	33	30.8411	5.85337e-20	SRC, HMGB1, PIK3CB, FGF2, TNF, AGER, EGFR, PIK3CG, INS, ICAM1, CCL5, CCL4, CCL2, PLCG1, ELANE, XBP1, JUN, TGFB1, PRKCD, FN1, PTPN11, MIF, MAPK14, SOD1, VEGFA, IL1A, IL6, IL1B, F2RL1, GHRL, EZR, TLR4, TLR3	105	678	16650	7.71808	2.85235e-16	1.74991e-18	1.15487e-18
GOTERM_BP_FAT	GO:0051046~regulation of secretion	33	30.8411	7.27959e-20	CRP, SRC, HMGB1, HIF1A, TNF, EGFR, HSPD1, AQP1, INS, CCL5, GLUL, CAMP, IL10, XBP1, TGFB1, NOS2, FN1, PTPN11, MIF, MAPK14, IL2, IL1A, IL6, IL5, IFNG, IRF3, IL1B, F2RL1, GHRL, EZR, TLR5, TLR4, TLR2	105	683	16650	7.66158	3.54734e-16	2.16301e-18	1.42751e-18
GOTERM_BP_FAT	GO:1903530~regulation of secretion by cell	32	29.9065	7.63987e-20	CRP, SRC, HMGB1, HIF1A, TNF, EGFR, HSPD1, INS, CCL5, GLUL, CAMP, IL10, XBP1, TGFB1, NOS2, FN1, PTPN11, MIF, MAPK14, IL2, IL1A, IL6, IL5, IFNG, IRF3, IL1B, F2RL1, GHRL, EZR, TLR5, TLR4, TLR2	105	630	16650	8.05442	3.72291e-16	2.25631e-18	1.48908e-18
GOTERM_BP_FAT	GO:0043410~positive regulation of MAPK cascade	29	27.1028	9.92914e-20	SRC, HMGB1, PIK3CB, FGF2, TNF, AGER, EGFR, PIK3CG, INS, ICAM1, CCL5, CCL4, CCL2, PLCG1, ELANE, JUN, TGFB1, PTPN11, MIF, MAPK14, SOD1, VEGFA, IL1A, IL6, IL1B, F2RL1, GHRL, TLR4, TLR3	105	485	16650	9.48159	4.83847e-16	2.91474e-18	1.92362e-18
GOTERM_BP_FAT	GO:0051047~positive regulation of secretion	26	24.2991	1.08001e-19	SRC, HMGB1, HIF1A, TNF, EGFR, HSPD1, AQP1, INS, GLUL, CAMP, IL10, XBP1, TGFB1, PTPN11, MIF, MAPK14, IL2, IL1A, IL6, IL5, IFNG, IRF3, IL1B, F2RL1, GHRL, EZR	105	355	16650	11.6137	5.26288e-16	3.15142e-18	2.07982e-18
GOTERM_BP_FAT	GO:0072358~cardiovascular system development	37	34.5794	1.78046e-19	CALCA, CXCL8, HMGB1, PIK3CB, PTGS2, FGF2, HIF1A, EGFR, PIK3CG, AQP1, SGPL1, CXCR3, CCL2, PLCG1, CAMP, XBP1, JUN, TGFB1, MMP2, IL18, FN1, PTPN11, MAPK14, SOD2, RHOA, PTK2, VEGFA, IL1A, CXCL10, PTPRB, IL6, IFNG, IL1B, BAX, GHRL, ITGA5, NFE2L2	105	945	16650	6.20862	8.67619e-16	5.13384e-18	3.38814e-18
GOTERM_BP_FAT	GO:0072359~circulatory system development	37	34.5794	1.78046e-19	CALCA, CXCL8, HMGB1, PIK3CB, PTGS2, FGF2, HIF1A, EGFR, PIK3CG, AQP1, SGPL1, CXCR3, CCL2, PLCG1, CAMP, XBP1, JUN, TGFB1, MMP2, IL18, FN1, PTPN11, MAPK14, SOD2, RHOA, PTK2, VEGFA, IL1A, CXCL10, PTPRB, IL6, IFNG, IL1B, BAX, GHRL, ITGA5, NFE2L2	105	945	16650	6.20862	8.67619e-16	5.13384e-18	3.38814e-18
GOTERM_BP_FAT	GO:0002697~regulation of immune effector process	25	23.3645	2.13545e-19	HMGB1, TNF, AGER, HSPD1, INS, CCL2, FYN, B2M, CD55, IL10, XBP1, TGFB1, RIPK3, IFNB1, IL18, MIF, IL2, IL6, IL5, IFNG, IL1B, IL2RA, F2RL1, TLR4, TLR3	105	325	16650	12.1978	1.0406e-15	6.12119e-18	4.03976e-18
GOTERM_BP_FAT	GO:0050865~regulation of cell activation	29	27.1028	2.34459e-19	SRC, HMGB1, AGER, HSPD1, CCL5, CCL2, FYN, CD55, IL10, XBP1, TGFB1, RIPK3, IFNB1, PRKCD, IL18, PTPN11, MIF, F2, IL2, SOD1, IL6, IL5, IFNG, CD209, IL1B, IL2RA, BCL2, F2RL1, TLR4	105	501	16650	9.17879	1.14252e-15	6.6814e-18	4.40948e-18
GOTERM_BP_FAT	GO:1903532~positive regulation of secretion by cell	25	23.3645	2.46341e-19	SRC, HMGB1, HIF1A, TNF, EGFR, HSPD1, INS, GLUL, CAMP, IL10, XBP1, TGFB1, PTPN11, MIF, MAPK14, IL2, IL1A, IL6, IL5, IFNG, IRF3, IL1B, F2RL1, GHRL, EZR	105	327	16650	12.1232	1.20042e-15	6.97919e-18	4.60601e-18
GOTERM_BP_FAT	GO:0051094~positive regulation of developmental process	39	36.4486	2.56607e-19	CALCA, CXCL8, SRC, HMGB1, PTGS2, FGF2, HIF1A, TNF, AGER, RELA, AQP1, CXCR3, FYN, PLCG1, CAMP, XBP1, JUN, TGFB1, IL18, FN1, ISG15, MAPK14, RHOA, IL2, VEGFA, IL1A, IL3, IL6, IL5, IFNG, IL1B, IL2RA, BCL2, BAX, GHRL, ITGA5, EZR, NFE2L2, TLR2	105	1089	16650	5.67887	1.25045e-15	7.22802e-18	4.77022e-18
GOTERM_BP_FAT	GO:0098609~cell-cell adhesion	40	37.3832	3.02015e-19	CALCA, IFNA1, SRC, HMGB1, PIK3CB, TNF, AGER, EGFR, PIK3CG, HSPD1, INS, ICAM1, CCL5, CCL2, FYN, B2M, CD55, ELANE, IL10, XBP1, TGFB1, RIPK3, IFNB1, PRKCD, IL18, PTPN11, IL2, PTK2, SOD1, IL6, IFNG, CD209, IL1B, IL2RA, BCL2, BAX, F2RL1, ITGA5, EZR, HSPA1A	105	1164	16650	5.44919	1.47172e-15	8.45816e-18	5.58207e-18
GOTERM_BP_FAT	GO:1901699~cellular response to nitrogen compound	30	28.0374	3.43701e-19	APP, SRC, PTGS2, TNF, RELA, EGFR, PIK3CG, AQP1, INS, ICAM1, AIFM1, CCL2, FYN, CAMP, XBP1, TGFB1, IFNB1, MMP2, PRKCD, PTPN11, PTK2, NFKB1, KLF2, SOD1, IL6, IRF3, IL1B, GHRL, EZR, TLR3	105	558	16650	8.52535	1.67486e-15	9.57061e-18	6.31625e-18
GOTERM_BP_FAT	GO:0009719~response to endogenous stimulus	45	42.0561	3.58125e-19	APP, CALCA, CXCL8, SRC, HMGB1, PTGS2, FGF2, TNF, RELA, EGFR, PIK3CG, HSPD1, AQP1, INS, ICAM1, AIFM1, CASP3, CCL5, CCL2, FYN, PLCG1, CD55, CAMP, IL10, XBP1, JUN, TGFB1, IFNB1, MMP2, PRKCD, PTPN11, DEFA1, MAPK14, RHOA, PTK2, NFKB1, KLF2, SOD1, IL6, IL1B, BCL2, GHRL, EZR, HSPA1A, TLR2	105	1548	16650	4.60963	1.74514e-15	9.91558e-18	6.54392e-18
GOTERM_BP_FAT	GO:0032602~chemokine production	16	14.9533	6.13303e-19	IL10, IL18, MIF, AGER, HIF1A, TNF, IL1A, IL6, IFNG, IL1B, CXCR3, F2RL1, TLR4, ELANE, TLR3, TLR2	105	76	16650	33.3835	2.98863e-15	1.68849e-17	1.11434e-17
GOTERM_BP_FAT	GO:0048878~chemical homeostasis	38	35.514	6.22744e-19	APP, CALCA, SRC, HMGB1, AQP5, PIK3CB, FGF2, HIF1A, EGFR, PIK3CG, KNG1, AQP1, INS, ICAM1, CCL5, CXCR3, CCL2, PLCG1, CCR5, B2M, CD55, ELANE, XBP1, TGFB1, IL18, PTPN11, F2, SOD2, IL2, SOD1, VEGFA, CXCL10, CXCL11, IL6, BCL2, BAX, F2RL1, GHRL	105	1049	16650	5.74425	3.03463e-15	1.70485e-17	1.12514e-17
GOTERM_BP_FAT	GO:0022407~regulation of cell-cell adhesion	26	24.2991	8.08641e-19	SRC, HMGB1, TNF, AGER, HSPD1, CCL5, CCL2, FYN, CD55, ELANE, IL10, XBP1, TGFB1, RIPK3, IFNB1, PRKCD, IL18, PTPN11, IL2, PTK2, SOD1, IL6, IFNG, CD209, IL1B, IL2RA	105	386	16650	10.681	3.94051e-15	2.2014e-17	1.45284e-17
GOTERM_BP_FAT	GO:0009891~positive regulation of biosynthetic process	47	43.9252	1.0704e-18	APP, CALCA, CSF2, SRC, HMGB1, PTGS2, FGF2, HIF1A, TNF, RELA, EGFR, INS, ICAM1, CCL5, CXCR3, CCL2, ELANE, IL10, XBP1, JUN, TGFB1, NOS2, IFNB1, PRKCD, IL18, MAPK14, F2, SOD2, IL2, NFKB1, KLF2, VEGFA, IL1A, IL3, CXCL10, IL6, IL5, IFNG, IL1B, IL9, F2RL1, TLR5, TP53, TLR4, TLR3, NFE2L2, TLR2	105	1760	16650	4.23458	5.21604e-15	2.8978e-17	1.91244e-17
GOTERM_BP_FAT	GO:1903037~regulation of leukocyte cell-cell adhesion	24	22.4299	1.47379e-18	IL10, XBP1, TGFB1, RIPK3, IFNB1, SRC, IL18, PTPN11, HMGB1, AGER, TNF, IL2, HSPD1, SOD1, IL6, IFNG, CD209, IL1B, IL2RA, CCL5, CCL2, FYN, CD55, ELANE	105	313	16650	12.1588	7.1818e-15	3.96784e-17	2.61863e-17
GOTERM_BP_FAT	GO:0042060~wound healing	29	27.1028	1.85432e-18	IFNA1, SRC, HMGB1, PIK3CB, FGF2, HIF1A, AGER, EGFR, PIK3CG, KNG1, INS, PLAU, CASP3, FYN, XBP1, TGFB1, IFNB1, PRKCD, FN1, PTPN11, MAPK14, F2, RHOA, IL1A, IL6, F2RL1, ITGA5, TLR4, NFE2L2	105	542	16650	8.48445	9.03612e-15	4.9649e-17	3.27665e-17
GOTERM_BP_FAT	GO:0045595~regulation of cell differentiation	44	41.1215	2.34407e-18	CRP, APP, CALCA, CSF2, HMGB1, PTGS2, FGF2, HIF1A, TNF, AGER, RELA, EGFR, INS, FYN, B2M, XBP1, JUN, TGFB1, IFNB1, IL18, FN1, ISG15, ACTN4, MAPK14, F2, SOD2, RHOA, IL2, PTK2, NFKB1, SOD1, VEGFA, IL3, CXCL10, IL6, IL5, IFNG, IL1B, IL2RA, BCL2, TLR4, TLR3, NFE2L2, TLR2	105	1544	16650	4.51887	1.14226e-14	6.24188e-17	4.11941e-17
GOTERM_BP_FAT	GO:0019725~cellular homeostasis	34	31.7757	2.68654e-18	APP, CALCA, HMGB1, AQP5, PIK3CB, FGF2, HIF1A, PIK3CG, KNG1, AQP1, ICAM1, AIFM1, CCL5, CXCR3, CCL2, PLCG1, CCR5, CD55, ELANE, CAMP, XBP1, TGFB1, NOS2, F2, IL2, SOD1, CXCL10, CXCL11, IL6, BCL2, BAX, F2RL1, GHRL, NFE2L2	105	833	16650	6.4723	1.30915e-14	7.11496e-17	4.69561e-17
GOTERM_BP_FAT	GO:0060341~regulation of cellular localization	34	31.7757	2.78467e-18	CALCA, SRC, PTGS2, HIF1A, TNF, EGFR, INS, CXCR3, CCL2, FYN, PLCG1, IL10, XBP1, TGFB1, PRKCD, IL18, PTPN11, MAPK14, F2, RHOA, VEGFA, CXCL10, CXCL11, IL6, IFNG, IL1B, BCL2, BAX, CRYAA, EZR, TP53, TLR4, TLR3, TLR2	105	834	16650	6.46454	1.35697e-14	7.33497e-17	4.84081e-17
GOTERM_BP_FAT	GO:1900182~positive regulation of protein localization to nucleus	18	16.8224	2.90858e-18	XBP1, TGFB1, SRC, PRKCD, IL18, F2, PTGS2, MAPK14, TNF, RHOA, EGFR, INS, IL6, IL1B, FYN, TLR4, TLR3, TLR2	105	128	16650	22.2991	1.41735e-14	7.62016e-17	5.02903e-17
GOTERM_BP_FAT	GO:0050730~regulation of peptidyl-tyrosine phosphorylation	21	19.6262	3.50243e-18	APP, TGFB1, CSF2, SRC, PRKCD, IL18, MIF, EGFR, IL2, INS, ICAM1, VEGFA, IL3, IL6, IL5, IFNG, CCL5, FYN, GHRL, ITGA5, TP53	105	216	16650	15.4167	1.70674e-14	9.12693e-17	6.02344e-17
GOTERM_BP_FAT	GO:0051249~regulation of lymphocyte activation	26	24.2991	3.611e-18	SRC, HMGB1, AGER, HSPD1, CCL5, CCL2, FYN, CD55, IL10, XBP1, TGFB1, RIPK3, IFNB1, IL18, PTPN11, MIF, IL2, SOD1, IL6, IL5, IFNG, CD209, IL1B, IL2RA, BCL2, TLR4	105	411	16650	10.0313	1.75964e-14	9.31026e-17	6.14443e-17
GOTERM_BP_FAT	GO:0042493~response to drug	26	24.2991	3.611e-18	ABCB1, SRC, PTGS2, RELA, EGFR, HSPD1, AQP1, ICAM1, CASP3, CCL4, CCL2, FYN, B2M, IL10, JUN, TGFB1, NOS2, SOD2, SOD1, IL6, IFNG, IL1B, BCL2, TP53, TLR3, NFE2L2	105	411	16650	10.0313	1.75964e-14	9.31026e-17	6.14443e-17
GOTERM_BP_FAT	GO:1903409~reactive oxygen species biosynthetic process	16	14.9533	3.69915e-18	IL10, NOS2, PTGS2, SOD2, TNF, EGFR, KLF2, HSPD1, INS, ICAM1, SOD1, IL6, IFNG, IL1B, TLR5, TLR4	105	85	16650	29.8487	1.80259e-14	9.48734e-17	6.26129e-17
GOTERM_BP_FAT	GO:0043549~regulation of kinase activity	33	30.8411	4.85273e-18	APP, CALCA, SRC, HMGB1, PIK3CB, FGF2, TNF, AGER, EGFR, PIK3CG, INS, CCL5, PLCG1, ELANE, TGFB1, RIPK3, PRKCD, IL18, PTPN11, MIF, MAPK14, F2, RHOA, PTK2, SOD1, VEGFA, CXCL10, IL6, IL1B, BAX, GHRL, TLR4, TLR3	105	788	16650	6.64068	2.36473e-14	1.23808e-16	8.17087e-17
GOTERM_BP_FAT	GO:0045859~regulation of protein kinase activity	32	29.9065	5.16234e-18	APP, CALCA, SRC, HMGB1, PIK3CB, FGF2, TNF, AGER, EGFR, PIK3CG, INS, CCL5, PLCG1, ELANE, TGFB1, RIPK3, PRKCD, IL18, PTPN11, MIF, MAPK14, RHOA, PTK2, SOD1, VEGFA, CXCL10, IL6, IL1B, BAX, GHRL, TLR4, TLR3	105	730	16650	6.95108	2.51561e-14	1.31021e-16	8.64692e-17
GOTERM_BP_FAT	GO:0002694~regulation of leukocyte activation	27	25.2336	6.44221e-18	SRC, HMGB1, AGER, HSPD1, CCL5, CCL2, FYN, CD55, IL10, XBP1, TGFB1, RIPK3, IFNB1, IL18, PTPN11, MIF, IL2, SOD1, IL6, IL5, IFNG, CD209, IL1B, IL2RA, BCL2, F2RL1, TLR4	105	468	16650	9.14835	3.13929e-14	1.62657e-16	1.07348e-16
GOTERM_BP_FAT	GO:0046209~nitric oxide metabolic process	15	14.0187	7.89612e-18	IL10, NOS2, PTGS2, SOD2, TNF, EGFR, KLF2, INS, ICAM1, IL6, IFNG, IL1B, TLR5, TLR4, TLR2	105	70	16650	33.9796	3.84778e-14	1.98339e-16	1.30897e-16
GOTERM_BP_FAT	GO:0051173~positive regulation of nitrogen compound metabolic process	46	42.9907	8.41148e-18	APP, CALCA, CSF2, SRC, HMGB1, PTGS2, FGF2, HIF1A, TNF, RELA, EGFR, INS, ICAM1, CCL5, CXCR3, IL10, XBP1, JUN, TGFB1, NOS2, IFNB1, PRKCD, IL18, MAPK14, SOD2, IL2, NFKB1, KLF2, VEGFA, IL1A, IL3, CXCL10, CXCL11, IL6, IL5, IFNG, IL1B, BAX, F2RL1, TLR5, TP53, TLR4, TLR3, HSPA1A, NFE2L2, TLR2	105	1767	16650	4.12806	4.09892e-14	2.10201e-16	1.38725e-16
GOTERM_BP_FAT	GO:0051347~positive regulation of transferase activity	30	28.0374	1.37419e-17	CALCA, SRC, HMGB1, PIK3CB, FGF2, TNF, AGER, EGFR, PIK3CG, INS, CCL5, PLCG1, ELANE, TGFB1, RIPK3, PRKCD, IL18, PTPN11, MIF, MAPK14, F2, RHOA, PTK2, SOD1, VEGFA, IL1B, BAX, GHRL, TLR4, TLR3	105	640	16650	7.43304	6.69643e-14	3.41655e-16	2.25479e-16
GOTERM_BP_FAT	GO:2001057~reactive nitrogen species metabolic process	15	14.0187	1.82304e-17	IL10, NOS2, PTGS2, SOD2, TNF, EGFR, KLF2, INS, ICAM1, IL6, IFNG, IL1B, TLR5, TLR4, TLR2	105	74	16650	32.1429	8.88368e-14	4.50948e-16	2.97609e-16
GOTERM_BP_FAT	GO:0002696~positive regulation of leukocyte activation	23	21.4953	2.01574e-17	IL10, XBP1, TGFB1, SRC, IL18, PTPN11, HMGB1, MIF, AGER, IL2, HSPD1, IL6, IL5, IFNG, IL1B, IL2RA, CCL5, BCL2, F2RL1, CCL2, FYN, TLR4, CD55	105	311	16650	11.7271	9.82268e-14	4.96095e-16	3.27404e-16
GOTERM_BP_FAT	GO:0031328~positive regulation of cellular biosynthetic process	45	42.0561	2.40197e-17	APP, CALCA, CSF2, SRC, HMGB1, PTGS2, FGF2, HIF1A, TNF, RELA, EGFR, INS, ICAM1, CCL5, CXCR3, ELANE, IL10, XBP1, JUN, TGFB1, NOS2, IFNB1, PRKCD, IL18, MAPK14, SOD2, IL2, NFKB1, KLF2, VEGFA, IL1A, IL3, CXCL10, IL6, IL5, IFNG, IL1B, IL9, F2RL1, TLR5, TP53, TLR4, TLR3, NFE2L2, TLR2	105	1729	16650	4.12708	1.17048e-13	5.88181e-16	3.88178e-16
GOTERM_BP_FAT	GO:0036211~protein modification process	65	60.7477	2.64786e-17	APP, CSF2, IFNA1, PIK3CB, HMGB1, FGF2, TNF, PIK3CG, ICAM1, CCR5, CAMP, RIPK3, PRKCD, IL18, MIF, F2, MMP9, RHOA, IL1A, IFNG, IL1B, ITGA5, EZR, TLR4, TP53, TLR3, TLR2, CALCA, SRC, AGER, EGFR, INS, PTPA, CCL5, CCL4, CCL2, FYN, PLCG1, ELANE, JUN, XBP1, TGFB1, NOS2, IFNB1, FN1, PTPN11, ISG15, MAPK14, NFKB1, IL2, PTK2, SOD1, VEGFA, CXCL10, IL3, PTPRB, IL6, IL5, IL2RA, BCL2, BAX, F2RL1, GHRL, NFE2L2, HS…	105	3818	16650	2.69962	1.2903e-13	6.41941e-16	4.23657e-16
GOTERM_BP_FAT	GO:0006464~cellular protein modification process	65	60.7477	2.64786e-17	APP, CSF2, IFNA1, PIK3CB, HMGB1, FGF2, TNF, PIK3CG, ICAM1, CCR5, CAMP, RIPK3, PRKCD, IL18, MIF, F2, MMP9, RHOA, IL1A, IFNG, IL1B, ITGA5, EZR, TLR4, TP53, TLR3, TLR2, CALCA, SRC, AGER, EGFR, INS, PTPA, CCL5, CCL4, CCL2, FYN, PLCG1, ELANE, JUN, XBP1, TGFB1, NOS2, IFNB1, FN1, PTPN11, ISG15, MAPK14, NFKB1, IL2, PTK2, SOD1, VEGFA, CXCL10, IL3, PTPRB, IL6, IL5, IL2RA, BCL2, BAX, F2RL1, GHRL, NFE2L2, HS…	105	3818	16650	2.69962	1.2903e-13	6.41941e-16	4.23657e-16
GOTERM_BP_FAT	GO:0032844~regulation of homeostatic process	26	24.2991	3.23897e-17	CALCA, SRC, PTGS2, FGF2, HIF1A, TNF, EGFR, CXCR3, PLCG1, CCR5, B2M, TGFB1, RIPK3, ISG15, MIF, MAPK14, F2, IL2, CXCL10, CXCL11, IL6, IL1B, IL2RA, BCL2, BAX, GHRL	105	451	16650	9.14159	1.57835e-13	7.78211e-16	5.1359e-16
GOTERM_BP_FAT	GO:0045088~regulation of innate immune response	24	22.4299	3.25289e-17	IFNA1, IFNB1, IFNGR1, SRC, MMP2, PRKCD, PTPN11, HMGB1, RELA, NFKB1, HSPD1, INS, CLEC4A, IFNG, IRF3, CD209, CCL5, F2RL1, FYN, TLR5, TLR4, TLR3, HSPA1A, TLR2	105	360	16650	10.5714	1.58513e-13	7.78211e-16	5.1359e-16
GOTERM_BP_FAT	GO:0014070~response to organic cyclic compound	34	31.7757	3.25785e-17	APP, IFNA1, SRC, HMGB1, PTGS2, TNF, RELA, EGFR, PIK3CG, HSPD1, AQP1, ICAM1, AIFM1, CASP3, CCL5, CCL2, CCR5, IL10, JUN, TGFB1, IFNB1, IL18, DEFA1, NFKB1, KLF2, SOD1, CXCL10, IL6, IRF3, IL1B, BCL2, EZR, TLR3, TLR2	105	906	16650	5.9508	1.58755e-13	7.78211e-16	5.1359e-16
GOTERM_BP_FAT	GO:0050867~positive regulation of cell activation	23	21.4953	3.68843e-17	IL10, XBP1, TGFB1, SRC, IL18, PTPN11, HMGB1, MIF, AGER, IL2, HSPD1, IL6, IL5, IFNG, IL1B, IL2RA, CCL5, BCL2, F2RL1, CCL2, FYN, TLR4, CD55	105	320	16650	11.3973	1.79737e-13	8.76766e-16	5.78633e-16
GOTERM_BP_FAT	GO:1903829~positive regulation of cellular protein localization	24	22.4299	3.90212e-17	XBP1, TGFB1, SRC, PRKCD, IL18, F2, PTGS2, MAPK14, TNF, RHOA, EGFR, INS, VEGFA, IL6, IFNG, IL1B, BCL2, CCL2, FYN, EZR, TP53, TLR4, TLR3, TLR2	105	363	16650	10.4841	1.90151e-13	9.23061e-16	6.09186e-16
GOTERM_BP_FAT	GO:1901342~regulation of vasculature development	21	19.6262	4.1877e-17	XBP1, CXCL8, HMGB1, PTGS2, FGF2, HIF1A, RHOA, AQP1, VEGFA, IL1A, CXCL10, IL6, IFNG, IL1B, CXCR3, CCL2, GHRL, PLCG1, ITGA5, CAMP, NFE2L2	105	245	16650	13.5918	2.04067e-13	9.85829e-16	6.5061e-16
GOTERM_BP_FAT	GO:0055065~metal ion homeostasis	28	26.1682	4.34708e-17	APP, CALCA, HMGB1, PIK3CB, FGF2, HIF1A, EGFR, PIK3CG, KNG1, CCL5, CXCR3, CCL2, PLCG1, CCR5, B2M, CD55, ELANE, TGFB1, F2, SOD2, IL2, SOD1, CXCL10, CXCL11, BCL2, BAX, F2RL1, GHRL	105	558	16650	7.95699	2.11833e-13	1.01843e-15	6.72126e-16
GOTERM_BP_FAT	GO:0045765~regulation of angiogenesis	20	18.6916	1.14144e-16	XBP1, CXCL8, HMGB1, PTGS2, FGF2, HIF1A, RHOA, AQP1, VEGFA, IL1A, CXCL10, IL6, IL1B, CXCR3, CCL2, GHRL, PLCG1, ITGA5, CAMP, NFE2L2	105	222	16650	14.2857	5.41012e-13	2.66137e-15	1.7564e-15
GOTERM_BP_FAT	GO:0071417~cellular response to organonitrogen compound	26	24.2991	1.20235e-16	APP, SRC, PTGS2, TNF, RELA, EGFR, PIK3CG, AQP1, INS, ICAM1, CCL2, FYN, CAMP, XBP1, TGFB1, MMP2, PRKCD, PTPN11, PTK2, NFKB1, KLF2, SOD1, IL6, IL1B, GHRL, EZR	105	477	16650	8.64331	5.41012e-13	2.79003e-15	1.84132e-15
GOTERM_BP_FAT	GO:0050863~regulation of T cell activation	22	20.5607	1.35442e-16	IL10, XBP1, TGFB1, RIPK3, IFNB1, SRC, IL18, PTPN11, HMGB1, AGER, IL2, HSPD1, SOD1, IL6, IFNG, CD209, IL1B, IL2RA, CCL5, CCL2, FYN, CD55	105	299	16650	11.6675	5.41012e-13	3.128e-15	2.06437e-15
GOTERM_BP_FAT	GO:0051338~regulation of transferase activity	34	31.7757	1.5303e-16	APP, CALCA, SRC, HMGB1, PIK3CB, FGF2, TNF, AGER, EGFR, PIK3CG, INS, CCL5, PLCG1, ELANE, TGFB1, RIPK3, PRKCD, IL18, PTPN11, MIF, MAPK14, F2, RHOA, PTK2, SOD1, VEGFA, CXCL10, IL6, IL1B, BAX, GHRL, TP53, TLR4, TLR3	105	955	16650	5.64547	5.41012e-13	3.51753e-15	2.32144e-15
GOTERM_BP_FAT	GO:0032637~interleukin-8 production	14	13.0841	1.54773e-16	IL10, CRP, CALCA, NOS2, TNF, IL1B, F2RL1, TLR5, TLR4, ELANE, CAMP, TLR3, HSPA1A, TLR2	105	66	16650	33.6364	5.41012e-13	3.52433e-15	2.32593e-15
GOTERM_BP_FAT	GO:0006809~nitric oxide biosynthetic process	14	13.0841	1.54773e-16	IL10, NOS2, PTGS2, SOD2, TNF, EGFR, KLF2, INS, ICAM1, IL6, IFNG, IL1B, TLR5, TLR4	105	66	16650	33.6364	5.41012e-13	3.52433e-15	2.32593e-15
GOTERM_BP_FAT	GO:0032635~interleukin-6 production	16	14.9533	1.83511e-16	IL10, XBP1, NOS2, HMGB1, TNF, KLF2, HSPD1, IL1A, IL6, IFNG, IL1B, F2RL1, GHRL, TLR4, TLR3, TLR2	105	109	16650	23.2765	1.08202e-12	4.1593e-15	2.74498e-15
GOTERM_BP_FAT	GO:0042742~defense response to bacterium	21	19.6262	2.07714e-16	IL10, CRP, APP, CALCA, NOS2, IFNB1, PRKCD, ISG15, DEFA1, TNF, IL6, IFNG, F2RL1, TLR5, B2M, TLR4, ELANE, CAMP, TLR3, MBL2, TLR2	105	266	16650	12.5188	1.08202e-12	4.68607e-15	3.09263e-15
GOTERM_BP_FAT	GO:0050731~positive regulation of peptidyl-tyrosine phosphorylation	18	16.8224	2.0922e-16	TGFB1, CSF2, SRC, IL18, MIF, IL2, INS, ICAM1, VEGFA, IL3, IL6, IL5, IFNG, CCL5, FYN, GHRL, ITGA5, TP53	105	164	16650	17.4042	1.08202e-12	4.69829e-15	3.1007e-15
GOTERM_BP_FAT	GO:0018108~peptidyl-tyrosine phosphorylation	23	21.4953	2.28808e-16	APP, TGFB1, CSF2, SRC, PRKCD, IL18, MIF, FGF2, EGFR, IL2, PTK2, INS, ICAM1, VEGFA, IL3, IL6, IL5, IFNG, CCL5, FYN, GHRL, ITGA5, TP53	105	349	16650	10.4503	1.08202e-12	5.11459e-15	3.37544e-15
GOTERM_BP_FAT	GO:0006979~response to oxidative stress	24	22.4299	2.33068e-16	APP, XBP1, JUN, SRC, PRKCD, PTGS2, SOD2, HIF1A, TNF, EGFR, RELA, KLF2, HSPD1, AQP1, INS, SOD1, IL6, AIFM1, CASP3, BCL2, TP53, HSPA1A, NFE2L2, MBL2	105	394	16650	9.65917	1.08202e-12	5.18602e-15	3.42258e-15
GOTERM_BP_FAT	GO:0071495~cellular response to endogenous stimulus	37	34.5794	2.47216e-16	APP, CALCA, CXCL8, SRC, PTGS2, FGF2, TNF, RELA, EGFR, PIK3CG, AQP1, INS, ICAM1, AIFM1, CCL5, CCL2, FYN, PLCG1, CAMP, XBP1, JUN, TGFB1, IFNB1, MMP2, PRKCD, PTPN11, DEFA1, RHOA, PTK2, NFKB1, KLF2, SOD1, IL6, IL1B, GHRL, EZR, HSPA1A	105	1185	16650	4.95118	1.08202e-12	5.47583e-15	3.61384e-15
GOTERM_BP_FAT	GO:0018212~peptidyl-tyrosine modification	23	21.4953	2.57867e-16	APP, TGFB1, CSF2, SRC, PRKCD, IL18, MIF, FGF2, EGFR, IL2, PTK2, INS, ICAM1, VEGFA, IL3, IL6, IL5, IFNG, CCL5, FYN, GHRL, ITGA5, TP53	105	351	16650	10.3907	1.08202e-12	5.68591e-15	3.75249e-15
GOTERM_BP_FAT	GO:1903426~regulation of reactive oxygen species biosynthetic process	14	13.0841	2.87749e-16	IL10, PTGS2, SOD2, TNF, EGFR, KLF2, HSPD1, INS, ICAM1, IL6, IFNG, IL1B, TLR5, TLR4	105	69	16650	32.1739	1.62304e-12	6.31621e-15	4.16846e-15
GOTERM_BP_FAT	GO:0009615~response to virus	22	20.5607	2.99516e-16	IFITM3, IFNA1, IFNB1, IFNGR1, SRC, ISG15, DEFA1, MAPK14, TNF, RELA, CXCL10, IL6, IFNG, IRF3, IL2RA, CCL5, CCL4, BCL2, F2RL1, FYN, B2M, TLR3	105	311	16650	11.2173	1.62304e-12	6.54504e-15	4.31948e-15
GOTERM_BP_FAT	GO:0022603~regulation of anatomical structure morphogenesis	35	32.7103	3.36318e-16	CXCL8, SRC, HMGB1, PTGS2, FGF2, HIF1A, TNF, AQP1, ICAM1, CXCR3, CCL2, FYN, PLCG1, CAMP, IL10, XBP1, TGFB1, FN1, ACTN4, MAPK14, F2, RHOA, PTK2, VEGFA, IL1A, CXCL10, IL6, IFNG, IL1B, BCL2, BAX, GHRL, ITGA5, EZR, NFE2L2	105	1051	16650	5.28069	1.62304e-12	7.31641e-15	4.82856e-15
GOTERM_BP_FAT	GO:0032642~regulation of chemokine production	14	13.0841	4.27845e-16	IL10, MIF, AGER, HIF1A, TNF, IL1A, IL6, IFNG, IL1B, F2RL1, TLR4, ELANE, TLR3, TLR2	105	71	16650	31.2676	2.16405e-12	9.26617e-15	6.11533e-15
GOTERM_BP_FAT	GO:0045428~regulation of nitric oxide biosynthetic process	13	12.1495	6.32848e-16	IL10, PTGS2, SOD2, TNF, EGFR, KLF2, INS, ICAM1, IL6, IFNG, IL1B, TLR5, TLR4	105	55	16650	37.4805	3.24607e-12	1.36454e-14	9.00548e-15
GOTERM_BP_FAT	GO:0070663~regulation of leukocyte proliferation	19	17.757	6.40891e-16	IL10, TGFB1, RIPK3, IL18, HMGB1, MIF, AGER, IL2, IL3, IL6, IL5, IFNG, CD209, IL1B, IL2RA, CCL5, BCL2, TLR4, CD55	105	208	16650	14.4849	3.24607e-12	1.3758e-14	9.07976e-15
GOTERM_BP_FAT	GO:0043065~positive regulation of apoptotic process	27	25.2336	9.28958e-16	SRC, HMGB1, PTGS2, TNF, KNG1, HSPD1, ICAM1, PTPA, AIFM1, CASP3, CCL5, CXCR3, IL10, XBP1, JUN, TGFB1, RIPK3, IFNB1, PRKCD, MMP9, SOD1, IL6, IFNG, BCL2, BAX, TP53, TLR3	105	572	16650	7.48501	4.32809e-12	1.98544e-14	1.31032e-14
GOTERM_BP_FAT	GO:1903706~regulation of hemopoiesis	22	20.5607	9.82121e-16	XBP1, JUN, CALCA, TGFB1, IFNB1, IL18, ISG15, HMGB1, MAPK14, AGER, HIF1A, TNF, IL2, SOD1, IL3, IL6, IL5, IFNG, IL2RA, TLR4, TLR3, NFE2L2	105	328	16650	10.6359	4.86911e-12	2.08982e-14	1.3792e-14
GOTERM_BP_FAT	GO:0050715~positive regulation of cytokine secretion	15	14.0187	9.86371e-16	IL10, XBP1, SRC, HMGB1, MIF, MAPK14, TNF, HSPD1, INS, IL1A, IFNG, IRF3, IL1B, F2RL1, CAMP	105	97	16650	24.5214	4.86911e-12	2.08982e-14	1.3792e-14
GOTERM_BP_FAT	GO:0022409~positive regulation of cell-cell adhesion	20	18.6916	1.00175e-15	IL10, XBP1, TGFB1, SRC, IL18, PTPN11, HMGB1, AGER, TNF, IL2, HSPD1, IL6, IFNG, IL1B, IL2RA, CCL5, CCL2, FYN, CD55, ELANE	105	248	16650	12.788	4.86911e-12	2.11321e-14	1.39464e-14
GOTERM_BP_FAT	GO:0051251~positive regulation of lymphocyte activation	21	19.6262	1.01133e-15	XBP1, TGFB1, SRC, IL18, PTPN11, HMGB1, MIF, AGER, IL2, HSPD1, IL6, IL5, IFNG, IL1B, IL2RA, CCL5, BCL2, CCL2, FYN, TLR4, CD55	105	287	16650	11.6028	4.86911e-12	2.12423e-14	1.40191e-14
GOTERM_BP_FAT	GO:0002250~adaptive immune response	24	22.4299	1.03846e-15	IL10, TGFB1, IFNA1, RIPK3, IFNB1, PRKCD, IL18, HMGB1, AGER, TNF, IL2, PIK3CG, HSPD1, ICAM1, CLEC4A, IL6, IFNG, CD209, IL1B, FYN, B2M, TLR4, CD55, MBL2	105	420	16650	9.06122	4.86911e-12	2.17184e-14	1.43334e-14
GOTERM_BP_FAT	GO:0070372~regulation of ERK1 and ERK2 cascade	20	18.6916	1.07033e-15	XBP1, JUN, TGFB1, SRC, FN1, PTPN11, HMGB1, MIF, FGF2, TNF, EGFR, ICAM1, VEGFA, IL6, CCL5, CCL4, F2RL1, CCL2, EZR, TLR4	105	249	16650	12.7367	5.41012e-12	2.22894e-14	1.47102e-14
GOTERM_BP_FAT	GO:0043068~positive regulation of programmed cell death	27	25.2336	1.11711e-15	SRC, HMGB1, PTGS2, TNF, KNG1, HSPD1, ICAM1, PTPA, AIFM1, CASP3, CCL5, CXCR3, IL10, XBP1, JUN, TGFB1, RIPK3, IFNB1, PRKCD, MMP9, SOD1, IL6, IFNG, BCL2, BAX, TP53, TLR3	105	577	16650	7.42015	5.41012e-12	2.31646e-14	1.52878e-14
GOTERM_BP_FAT	GO:0050801~ion homeostasis	29	27.1028	1.39238e-15	APP, CALCA, SRC, HMGB1, PIK3CB, FGF2, HIF1A, EGFR, PIK3CG, KNG1, CCL5, CXCR3, CCL2, PLCG1, CCR5, B2M, CD55, ELANE, TGFB1, F2, SOD2, IL2, SOD1, CXCL10, CXCL11, BCL2, BAX, F2RL1, GHRL	105	699	16650	6.57879	7.03315e-12	2.87503e-14	1.89741e-14
GOTERM_BP_FAT	GO:2001233~regulation of apoptotic signaling pathway	23	21.4953	1.45691e-15	XBP1, CSF2, RIPK3, IFNB1, SRC, PRKCD, MIF, SOD2, HIF1A, TNF, MMP9, RELA, INS, ICAM1, SOD1, IL1A, IL1B, BCL2, BAX, FYN, TP53, HSPA1A, NFE2L2	105	380	16650	9.59774	7.03315e-12	2.99558e-14	1.97697e-14
GOTERM_BP_FAT	GO:0045429~positive regulation of nitric oxide biosynthetic process	12	11.215	1.57499e-15	IL6, IFNG, IL1B, SOD2, TLR5, PTGS2, TNF, TLR4, EGFR, KLF2, ICAM1, INS	105	43	16650	44.2525	7.57416e-12	3.19184e-14	2.10649e-14
GOTERM_BP_FAT	GO:1904407~positive regulation of nitric oxide metabolic process	12	11.215	1.57499e-15	IL6, IFNG, IL1B, SOD2, TLR5, PTGS2, TNF, TLR4, EGFR, KLF2, ICAM1, INS	105	43	16650	44.2525	7.57416e-12	3.19184e-14	2.10649e-14
GOTERM_BP_FAT	GO:1900180~regulation of protein localization to nucleus	19	17.757	1.57856e-15	IL10, XBP1, TGFB1, SRC, PRKCD, IL18, F2, PTGS2, MAPK14, TNF, RHOA, EGFR, INS, IL6, IL1B, FYN, TLR4, TLR3, TLR2	105	218	16650	13.8204	7.57416e-12	3.19184e-14	2.10649e-14
GOTERM_BP_FAT	GO:1903039~positive regulation of leukocyte cell-cell adhesion	19	17.757	1.57856e-15	XBP1, TGFB1, SRC, IL18, PTPN11, HMGB1, AGER, TNF, IL2, HSPD1, IL6, IFNG, IL1B, IL2RA, CCL5, CCL2, FYN, CD55, ELANE	105	218	16650	13.8204	7.57416e-12	3.19184e-14	2.10649e-14
GOTERM_BP_FAT	GO:0036293~response to decreased oxygen levels	21	19.6262	1.63673e-15	TGFB1, NOS2, SRC, MMP2, ACTN4, PTGS2, SOD2, AGER, HIF1A, HSPD1, AQP1, ICAM1, VEGFA, AIFM1, PLAU, CASP3, BCL2, CCL2, TP53, NFE2L2, TLR2	105	295	16650	11.2881	8.11518e-12	3.29578e-14	2.17509e-14
GOTERM_BP_FAT	GO:0055080~cation homeostasis	28	26.1682	1.66902e-15	APP, CALCA, HMGB1, PIK3CB, FGF2, HIF1A, EGFR, PIK3CG, KNG1, CCL5, CXCR3, CCL2, PLCG1, CCR5, B2M, CD55, ELANE, TGFB1, F2, SOD2, IL2, SOD1, CXCL10, CXCL11, BCL2, BAX, F2RL1, GHRL	105	643	16650	6.90513	8.11518e-12	3.34697e-14	2.20888e-14
GOTERM_BP_FAT	GO:0045785~positive regulation of cell adhesion	23	21.4953	1.87501e-15	IL10, XBP1, TGFB1, SRC, IL18, FN1, PTPN11, HMGB1, AGER, TNF, IL2, HSPD1, VEGFA, IL6, IFNG, IL1B, IL2RA, CCL5, CCL2, FYN, ITGA5, CD55, ELANE	105	385	16650	9.4731	9.1972e-12	3.74464e-14	2.47133e-14
GOTERM_BP_FAT	GO:0072507~divalent inorganic cation homeostasis	24	22.4299	1.89609e-15	APP, CALCA, TGFB1, HMGB1, PIK3CB, F2, FGF2, EGFR, IL2, PIK3CG, KNG1, CXCL10, CXCL11, CCL5, CXCR3, BCL2, BAX, F2RL1, CCL2, GHRL, PLCG1, CCR5, CD55, ELANE	105	433	16650	8.78918	9.1972e-12	3.77129e-14	2.48891e-14
GOTERM_BP_FAT	GO:0032147~activation of protein kinase activity	21	19.6262	1.96282e-15	CALCA, RIPK3, SRC, PRKCD, IL18, PTPN11, HMGB1, PIK3CB, MAPK14, FGF2, TNF, EGFR, INS, SOD1, VEGFA, IL1B, CCL5, GHRL, PLCG1, TLR4, TLR3	105	298	16650	11.1745	9.73821e-12	3.87309e-14	2.5561e-14
GOTERM_BP_FAT	GO:0032677~regulation of interleukin-8 production	13	12.1495	1.96317e-15	IL10, CRP, CALCA, TNF, IL1B, F2RL1, TLR5, TLR4, ELANE, CAMP, TLR3, HSPA1A, TLR2	105	60	16650	34.3571	9.73821e-12	3.87309e-14	2.5561e-14
GOTERM_BP_FAT	GO:0002685~regulation of leukocyte migration	17	15.8879	2.12834e-15	TGFB1, CXCL8, RIPK3, HMGB1, TNF, ICAM1, VEGFA, IL1A, CXCL10, CXCL11, IL6, CCL5, CXCR3, CCL4, F2RL1, CCL2, ELANE	105	156	16650	17.2802	1.02792e-11	4.18202e-14	2.75998e-14
GOTERM_BP_FAT	GO:0055082~cellular chemical homeostasis	29	27.1028	2.33311e-15	APP, CALCA, HMGB1, AQP5, PIK3CB, FGF2, HIF1A, PIK3CG, KNG1, AQP1, ICAM1, CCL5, CXCR3, CCL2, PLCG1, CCR5, CD55, ELANE, XBP1, TGFB1, F2, IL2, SOD1, CXCL10, CXCL11, BCL2, BAX, F2RL1, GHRL	105	713	16650	6.44961	1.13612e-11	4.56596e-14	3.01336e-14
GOTERM_BP_FAT	GO:0042089~cytokine biosynthetic process	15	14.0187	2.45992e-15	IL10, IL18, TNF, RELA, NFKB1, IL1A, IL6, IFNG, IRF3, IL1B, IL9, GHRL, TLR4, ELANE, TLR3	105	103	16650	23.0929	1.19023e-11	4.79487e-14	3.16444e-14
GOTERM_BP_FAT	GO:0033554~cellular response to stress	43	40.1869	2.70358e-15	CXCL8, SRC, HMGB1, PTGS2, HIF1A, TNF, AGER, RELA, EGFR, AQP1, INS, ICAM1, AIFM1, CCL2, GLUL, XBP1, JUN, PRKCD, PTPN11, ISG15, MIF, MAPK14, SOD2, NFKB1, KLF2, SOD1, VEGFA, IL1A, CXCL10, IL6, IFNG, IRF3, IL1B, ALB, BCL2, BAX, F2RL1, EZR, TP53, TLR4, TLR3, HSPA1A, NFE2L2	105	1773	16650	3.84578	1.29843e-11	5.24881e-14	3.46402e-14
GOTERM_BP_FAT	GO:0006875~cellular metal ion homeostasis	25	23.3645	2.75838e-15	APP, CALCA, HMGB1, PIK3CB, FGF2, HIF1A, PIK3CG, KNG1, CCL5, CXCR3, CCL2, PLCG1, CCR5, CD55, ELANE, TGFB1, F2, IL2, SOD1, CXCL10, CXCL11, BCL2, BAX, F2RL1, GHRL	105	491	16650	8.0739	1.35253e-11	5.33396e-14	3.52022e-14
GOTERM_BP_FAT	GO:0098771~inorganic ion homeostasis	28	26.1682	2.87401e-15	APP, CALCA, HMGB1, PIK3CB, FGF2, HIF1A, EGFR, PIK3CG, KNG1, CCL5, CXCR3, CCL2, PLCG1, CCR5, B2M, CD55, ELANE, TGFB1, F2, SOD2, IL2, SOD1, CXCL10, CXCL11, BCL2, BAX, F2RL1, GHRL	105	658	16650	6.74772	1.40663e-11	5.53558e-14	3.65328e-14
GOTERM_BP_FAT	GO:0006874~cellular calcium ion homeostasis	23	21.4953	2.91941e-15	APP, CALCA, TGFB1, HMGB1, PIK3CB, F2, FGF2, IL2, PIK3CG, KNG1, CXCL10, CXCL11, CCL5, CXCR3, BCL2, BAX, F2RL1, CCL2, GHRL, PLCG1, CCR5, CD55, ELANE	105	393	16650	9.28026	1.40663e-11	5.60091e-14	3.69639e-14
GOTERM_BP_FAT	GO:0042107~cytokine metabolic process	15	14.0187	3.2089e-15	IL10, IL18, TNF, RELA, NFKB1, IL1A, IL6, IFNG, IRF3, IL1B, IL9, GHRL, TLR4, ELANE, TLR3	105	105	16650	22.6531	1.56893e-11	6.13215e-14	4.04699e-14
GOTERM_BP_FAT	GO:0032675~regulation of interleukin-6 production	15	14.0187	3.6609e-15	IL10, XBP1, HMGB1, TNF, KLF2, HSPD1, IL1A, IL6, IFNG, IL1B, F2RL1, GHRL, TLR4, TLR3, TLR2	105	106	16650	22.4394	1.78534e-11	6.96859e-14	4.59901e-14
GOTERM_BP_FAT	GO:0010942~positive regulation of cell death	27	25.2336	3.78589e-15	SRC, HMGB1, PTGS2, TNF, KNG1, HSPD1, ICAM1, PTPA, AIFM1, CASP3, CCL5, CXCR3, IL10, XBP1, JUN, TGFB1, RIPK3, IFNB1, PRKCD, MMP9, SOD1, IL6, IFNG, BCL2, BAX, TP53, TLR3	105	607	16650	7.05342	1.83944e-11	7.17847e-14	4.73752e-14
GOTERM_BP_FAT	GO:1903708~positive regulation of hemopoiesis	17	15.8879	4.28524e-15	XBP1, JUN, CALCA, TGFB1, IL18, ISG15, HMGB1, MAPK14, AGER, HIF1A, TNF, IL2, IL3, IL6, IL5, IFNG, IL2RA	105	163	16650	16.5381	2.10995e-11	8.09378e-14	5.3416e-14
GOTERM_BP_FAT	GO:0002443~leukocyte mediated immunity	22	20.5607	4.77842e-15	IL10, TGFB1, RIPK3, IFNB1, PRKCD, HMGB1, AGER, TNF, IL2, PIK3CG, HSPD1, ICAM1, IL6, IFNG, IL1B, F2RL1, B2M, TLR4, CD55, ELANE, TLR3, MBL2	105	356	16650	9.79936	2.32635e-11	8.99045e-14	5.93336e-14
GOTERM_BP_FAT	GO:0050670~regulation of lymphocyte proliferation	18	16.8224	5.33659e-15	IL10, TGFB1, RIPK3, IL18, HMGB1, MIF, AGER, IL2, IL6, IL5, IFNG, CD209, IL1B, IL2RA, CCL5, BCL2, TLR4, CD55	105	198	16650	14.4156	2.59686e-11	1.0002e-13	6.60096e-14
GOTERM_BP_FAT	GO:0055074~calcium ion homeostasis	23	21.4953	5.45365e-15	APP, CALCA, TGFB1, HMGB1, PIK3CB, F2, FGF2, IL2, PIK3CG, KNG1, CXCL10, CXCL11, CCL5, CXCR3, BCL2, BAX, F2RL1, CCL2, GHRL, PLCG1, CCR5, CD55, ELANE	105	405	16650	9.00529	2.65096e-11	1.01648e-13	6.70838e-14
GOTERM_BP_FAT	GO:0070482~response to oxygen levels	21	19.6262	5.46516e-15	TGFB1, NOS2, SRC, MMP2, ACTN4, PTGS2, SOD2, AGER, HIF1A, HSPD1, AQP1, ICAM1, VEGFA, AIFM1, PLAU, CASP3, BCL2, CCL2, TP53, NFE2L2, TLR2	105	314	16650	10.6051	2.65096e-11	1.01648e-13	6.70838e-14
GOTERM_BP_FAT	GO:0002687~positive regulation of leukocyte migration	15	14.0187	5.51875e-15	TGFB1, CXCL8, HMGB1, TNF, ICAM1, VEGFA, IL1A, CXCL10, CXCL11, IL6, CCL5, CCL4, F2RL1, CCL2, ELANE	105	109	16650	21.8218	2.70506e-11	1.02254e-13	6.7484e-14
GOTERM_BP_FAT	GO:0048646~anatomical structure formation involved in morphogenesis	35	32.7103	5.71375e-15	CXCL8, HMGB1, PIK3CB, PTGS2, FGF2, HIF1A, TNF, PIK3CG, AQP1, CASP3, CXCR3, CCL2, PLCG1, CAMP, XBP1, JUN, TGFB1, MMP2, IL18, FN1, PTPN11, MAPK14, MMP9, RHOA, PTK2, VEGFA, IL1A, CXCL10, PTPRB, IL1B, BAX, GHRL, ITGA5, NFE2L2, TLR2	105	1151	16650	4.82189	2.75916e-11	1.05466e-13	6.96038e-14
GOTERM_BP_FAT	GO:0032944~regulation of mononuclear cell proliferation	18	16.8224	5.77503e-15	IL10, TGFB1, RIPK3, IL18, HMGB1, MIF, AGER, IL2, IL6, IL5, IFNG, CD209, IL1B, IL2RA, CCL5, BCL2, TLR4, CD55	105	199	16650	14.3431	2.81326e-11	1.06195e-13	7.00848e-14
GOTERM_BP_FAT	GO:1903827~regulation of cellular protein localization	26	24.2991	5.82639e-15	SRC, PTGS2, TNF, EGFR, INS, CCL2, FYN, IL10, XBP1, TGFB1, PRKCD, IL18, PTPN11, MAPK14, F2, RHOA, VEGFA, IL6, IFNG, IL1B, BCL2, EZR, TP53, TLR4, TLR3, TLR2	105	562	16650	7.33604	2.81326e-11	1.06737e-13	7.04424e-14
GOTERM_BP_FAT	GO:0002440~production of molecular mediator of immune response	17	15.8879	6.30624e-15	IL10, XBP1, TGFB1, IFNB1, MIF, TNF, IL2, HSPD1, IL6, IL5, IFNG, F2RL1, B2M, TLR4, CD55, TLR3, TLR2	105	167	16650	16.142	3.08377e-11	1.15095e-13	7.59584e-14
GOTERM_BP_FAT	GO:0072503~cellular divalent inorganic cation homeostasis	23	21.4953	8.14916e-15	APP, CALCA, TGFB1, HMGB1, PIK3CB, F2, FGF2, IL2, PIK3CG, KNG1, CXCL10, CXCL11, CCL5, CXCR3, BCL2, BAX, F2RL1, CCL2, GHRL, PLCG1, CCR5, CD55, ELANE	105	413	16650	8.83085	3.94939e-11	1.48175e-13	9.779e-14
GOTERM_BP_FAT	GO:0045935~positive regulation of nucleobase-containing compound metabolic process	41	38.3178	9.22094e-15	APP, CALCA, CSF2, SRC, HMGB1, FGF2, HIF1A, TNF, RELA, EGFR, INS, CXCR3, IL10, XBP1, JUN, TGFB1, NOS2, IFNB1, PRKCD, IL18, MAPK14, IL2, NFKB1, KLF2, VEGFA, IL1A, IL3, CXCL10, CXCL11, IL6, IL5, IFNG, IL1B, BAX, F2RL1, TP53, TLR4, TLR3, HSPA1A, NFE2L2, TLR2	105	1658	16650	3.92125	4.4904e-11	1.6704e-13	1.1024e-13
GOTERM_BP_FAT	GO:0071407~cellular response to organic cyclic compound	25	23.3645	9.99047e-15	APP, SRC, PTGS2, TNF, RELA, EGFR, PIK3CG, AQP1, AIFM1, CASP3, CCL5, CCL2, IL10, TGFB1, IFNB1, IL18, DEFA1, NFKB1, KLF2, SOD1, IL6, IRF3, IL1B, EZR, TLR3	105	520	16650	7.62363	4.86911e-11	1.80309e-13	1.18998e-13
GOTERM_BP_FAT	GO:1903428~positive regulation of reactive oxygen species biosynthetic process	12	11.215	1.00558e-14	IL6, IFNG, IL1B, SOD2, TLR5, PTGS2, TNF, TLR4, EGFR, KLF2, ICAM1, INS	105	50	16650	38.0571	4.92321e-11	1.80818e-13	1.19333e-13
GOTERM_BP_FAT	GO:0070371~ERK1 and ERK2 cascade	19	17.757	1.04682e-14	XBP1, JUN, TGFB1, SRC, PTPN11, HMGB1, MIF, FGF2, TNF, EGFR, ICAM1, VEGFA, IL6, CCL5, CCL4, F2RL1, CCL2, EZR, TLR4	105	243	16650	12.3986	5.08551e-11	1.87542e-13	1.23771e-13
GOTERM_BP_FAT	GO:0010648~negative regulation of cell communication	35	32.7103	1.26154e-14	CALCA, CSF2, CXCL8, SRC, PTGS2, HIF1A, TNF, AGER, RELA, EGFR, INS, ICAM1, CCL5, FYN, IL10, XBP1, TGFB1, PRKCD, PTPN11, MIF, MAPK14, SOD2, MMP9, IL1A, IL6, IL1B, BCL2, BAX, F2RL1, GHRL, EZR, TLR4, TLR3, HSPA1A, NFE2L2	105	1182	16650	4.69543	6.16753e-11	2.25182e-13	1.48612e-13
GOTERM_BP_FAT	GO:0051130~positive regulation of cellular component organization	35	32.7103	1.28828e-14	CSF2, SRC, FGF2, HIF1A, TNF, INS, ICAM1, CCL2, FYN, B2M, MBL2, XBP1, JUN, TGFB1, PRKCD, FN1, ACTN4, MAPK14, MMP9, RHOA, IL2, VEGFA, IL1A, IL6, IL5, IFNG, IL1B, BCL2, BAX, F2RL1, GHRL, EZR, TP53, TLR4, NFE2L2	105	1183	16650	4.69146	6.27574e-11	2.29117e-13	1.51209e-13
GOTERM_BP_FAT	GO:0001666~response to hypoxia	20	18.6916	1.29666e-14	TGFB1, NOS2, SRC, MMP2, ACTN4, PTGS2, SOD2, AGER, HIF1A, HSPD1, AQP1, ICAM1, VEGFA, PLAU, CASP3, BCL2, CCL2, TP53, NFE2L2, TLR2	105	286	16650	11.0889	6.32984e-11	2.29768e-13	1.51638e-13
GOTERM_BP_FAT	GO:0023057~negative regulation of signaling	35	32.7103	1.39462e-14	CALCA, CSF2, CXCL8, SRC, PTGS2, HIF1A, TNF, AGER, RELA, EGFR, INS, ICAM1, CCL5, FYN, IL10, XBP1, TGFB1, PRKCD, PTPN11, MIF, MAPK14, SOD2, MMP9, IL1A, IL6, IL1B, BCL2, BAX, F2RL1, GHRL, EZR, TLR4, TLR3, HSPA1A, NFE2L2	105	1186	16650	4.6796	6.81675e-11	2.46231e-13	1.62503e-13
GOTERM_BP_FAT	GO:2001234~negative regulation of apoptotic signaling pathway	18	16.8224	1.40841e-14	XBP1, CSF2, SRC, MIF, SOD2, HIF1A, TNF, MMP9, RELA, INS, ICAM1, IL1A, IL1B, BCL2, BAX, FYN, HSPA1A, NFE2L2	105	210	16650	13.5918	6.87085e-11	2.47769e-13	1.63519e-13
GOTERM_BP_FAT	GO:0046824~positive regulation of nucleocytoplasmic transport	15	14.0187	1.50977e-14	XBP1, TGFB1, PRKCD, IL18, PTGS2, MAPK14, TNF, RHOA, EGFR, IL6, IL1B, TP53, TLR4, TLR3, TLR2	105	117	16650	20.3297	7.35776e-11	2.63696e-13	1.74029e-13
GOTERM_BP_FAT	GO:0050729~positive regulation of inflammatory response	15	14.0187	1.50977e-14	IL18, PTGS2, TNF, EGFR, IL2, PIK3CG, HSPD1, IL6, IL1B, CCL5, CCL4, CCL2, TLR4, TLR3, TLR2	105	117	16650	20.3297	7.35776e-11	2.63696e-13	1.74029e-13
GOTERM_BP_FAT	GO:0010557~positive regulation of macromolecule biosynthetic process	40	37.3832	1.54639e-14	APP, CSF2, SRC, HMGB1, FGF2, HIF1A, TNF, RELA, EGFR, INS, CCL5, CXCR3, CCL2, ELANE, IL10, XBP1, JUN, TGFB1, IFNB1, IL18, MAPK14, F2, IL2, NFKB1, KLF2, VEGFA, IL1A, IL3, CXCL10, IL6, IL5, IFNG, IL1B, IL9, F2RL1, TP53, TLR4, TLR3, NFE2L2, TLR2	105	1597	16650	3.97173	7.52006e-11	2.69127e-13	1.77614e-13
GOTERM_BP_FAT	GO:0070374~positive regulation of ERK1 and ERK2 cascade	17	15.8879	1.57681e-14	JUN, TGFB1, SRC, PTPN11, HMGB1, MIF, FGF2, TNF, EGFR, ICAM1, VEGFA, IL6, CCL5, CCL4, F2RL1, CCL2, TLR4	105	177	16650	15.23	7.68237e-11	2.73444e-13	1.80463e-13
GOTERM_BP_FAT	GO:0032615~interleukin-12 production	12	11.215	1.60572e-14	IL10, IFNG, PRKCD, HMGB1, MAPK14, AGER, TLR4, RELA, NFKB1, TLR3, HSPD1, TLR2	105	52	16650	36.5934	7.84467e-11	2.77471e-13	1.83121e-13
GOTERM_BP_FAT	GO:0060326~cell chemotaxis	19	17.757	1.84169e-14	IL10, CALCA, CXCL8, PRKCD, HMGB1, FGF2, PIK3CG, VEGFA, CXCL10, CXCL11, IL6, IFNG, IL1B, CCL5, CXCR3, CCL4, F2RL1, CCL2, CCR5	105	251	16650	12.0034	8.98079e-11	3.17122e-13	2.09289e-13
GOTERM_BP_FAT	GO:0051248~negative regulation of protein metabolic process	33	30.8411	1.89439e-14	APP, SRC, TNF, RELA, EGFR, KNG1, AQP1, INS, PTPA, FYN, CD55, ELANE, IL10, XBP1, JUN, TGFB1, NOS2, PRKCD, ISG15, MIF, F2, MMP9, IL2, NFKB1, VEGFA, IL6, IL1B, BAX, F2RL1, GHRL, EZR, TLR4, HSPA1A	105	1049	16650	4.98842	9.2513e-11	3.25047e-13	2.14519e-13
GOTERM_BP_FAT	GO:0045597~positive regulation of cell differentiation	30	28.0374	1.96557e-14	CALCA, CSF2, HMGB1, PTGS2, FGF2, HIF1A, TNF, AGER, RELA, INS, FYN, XBP1, JUN, TGFB1, IL18, FN1, ISG15, MAPK14, RHOA, IL2, NFKB1, VEGFA, IL3, IL6, IL5, IFNG, IL2RA, BCL2, NFE2L2, TLR2	105	841	16650	5.65653	9.57591e-11	3.36078e-13	2.21799e-13
GOTERM_BP_FAT	GO:0002367~cytokine production involved in immune response	13	12.1495	2.46599e-14	IL10, TGFB1, IFNB1, MIF, TNF, HSPD1, IL6, F2RL1, B2M, TLR4, CD55, TLR3, TLR2	105	73	16650	28.2387	1.20105e-10	4.20167e-13	2.77295e-13
GOTERM_BP_FAT	GO:0071496~cellular response to external stimulus	19	17.757	2.76504e-14	XBP1, JUN, TGFB1, PTGS2, EGFR, NFKB1, AQP1, ICAM1, IL6, AIFM1, IL1B, ALB, BCL2, TLR5, GLUL, TP53, TLR4, TLR3, NFE2L2	105	257	16650	11.7232	1.34712e-10	4.69479e-13	3.09839e-13
GOTERM_BP_FAT	GO:0030099~myeloid cell differentiation	21	19.6262	2.90149e-14	JUN, CALCA, TGFB1, CSF2, SRC, ISG15, PTPN11, HMGB1, MAPK14, HIF1A, TNF, MMP9, KLF2, VEGFA, IL3, IL5, IFNG, CASP3, F2RL1, TLR4, TLR3	105	343	16650	9.70845	1.41204e-10	4.89787e-13	3.23241e-13
GOTERM_BP_FAT	GO:0009725~response to hormone	30	28.0374	2.90475e-14	SRC, HMGB1, PTGS2, TNF, RELA, EGFR, HSPD1, AQP1, INS, ICAM1, AIFM1, CASP3, CCL2, FYN, CD55, IL10, XBP1, JUN, TGFB1, IFNB1, PRKCD, PTPN11, DEFA1, PTK2, NFKB1, IL6, IL1B, BCL2, GHRL, TLR2	105	854	16650	5.57042	1.41745e-10	4.89787e-13	3.23241e-13
GOTERM_BP_FAT	GO:0048661~positive regulation of smooth muscle cell proliferation	13	12.1495	2.9256e-14	IL10, XBP1, JUN, MMP2, IL18, PTGS2, FGF2, TNF, MMP9, EGFR, IL6, CCL5, ELANE	105	74	16650	27.8571	1.42827e-10	4.91601e-13	3.24438e-13
GOTERM_BP_FAT	GO:0042307~positive regulation of protein import into nucleus	14	13.0841	3.07403e-14	XBP1, TGFB1, PRKCD, IL18, PTGS2, MAPK14, TNF, RHOA, EGFR, IL6, IL1B, TLR4, TLR3, TLR2	105	97	16650	22.8866	1.4986e-10	5.14768e-13	3.39728e-13
GOTERM_BP_FAT	GO:0006897~endocytosis	27	25.2336	3.19968e-14	CRP, APP, CALCA, CXCL8, SRC, HMGB1, PIK3CB, TNF, EGFR, PIK3CG, MRC1, CCL2, FYN, PLCG1, B2M, ELANE, MBL2, TGFB1, PRKCD, ACTN4, PTK2, VEGFA, CD209, IL1B, ALB, F2RL1, EZR	105	665	16650	6.43824	1.55811e-10	5.33974e-13	3.52403e-13
GOTERM_BP_FAT	GO:0002253~activation of immune response	25	23.3645	3.42119e-14	SRC, HMGB1, PIK3CB, RELA, HSPD1, FYN, PLCG1, CD55, MBL2, PRKCD, PTK2, NFKB1, CLEC4A, IFNG, IRF3, CD209, BCL2, BAX, F2RL1, EZR, TLR5, TLR4, TLR3, HSPA1A, TLR2	105	550	16650	7.20779	1.66632e-10	5.68993e-13	3.75514e-13
GOTERM_BP_FAT	GO:0071363~cellular response to growth factor stimulus	26	24.2991	3.79285e-14	APP, CALCA, CXCL8, SRC, FGF2, HIF1A, RELA, EGFR, CASP3, CCL5, CCL2, FYN, PLCG1, IL10, XBP1, JUN, TGFB1, PTPN11, MAPK14, RHOA, PTK2, VEGFA, IL6, IL1B, ITGA5, HSPA1A	105	610	16650	6.75878	1.85026e-10	6.28659e-13	4.14892e-13
GOTERM_BP_FAT	GO:0001818~negative regulation of cytokine production	18	16.8224	3.82111e-14	IL10, TGFB1, IFNB1, FN1, ISG15, HMGB1, AGER, TNF, NFKB1, KLF2, IL6, IFNG, IRF3, F2RL1, GHRL, EZR, TLR4, ELANE	105	223	16650	12.7995	1.86108e-10	6.31195e-13	4.16565e-13
GOTERM_BP_FAT	GO:1904591~positive regulation of protein import	14	13.0841	4.03725e-14	XBP1, TGFB1, PRKCD, IL18, PTGS2, MAPK14, TNF, RHOA, EGFR, IL6, IL1B, TLR4, TLR3, TLR2	105	99	16650	22.4242	1.96928e-10	6.64646e-13	4.38642e-13
GOTERM_BP_FAT	GO:0002703~regulation of leukocyte mediated immunity	16	14.9533	4.43071e-14	IL10, TGFB1, RIPK3, IFNB1, HMGB1, AGER, TNF, IL2, HSPD1, IL6, IFNG, IL1B, F2RL1, B2M, TLR4, TLR3	105	156	16650	16.2637	2.15864e-10	7.26965e-13	4.7977e-13
GOTERM_BP_FAT	GO:0045766~positive regulation of angiogenesis	15	14.0187	4.83774e-14	XBP1, CXCL8, HMGB1, PTGS2, FGF2, HIF1A, AQP1, VEGFA, IL1A, IL1B, CXCR3, PLCG1, ITGA5, CAMP, NFE2L2	105	127	16650	18.7289	2.35881e-10	7.91084e-13	5.22086e-13
GOTERM_BP_FAT	GO:0030595~leukocyte chemotaxis	17	15.8879	6.6995e-14	IL10, CALCA, CXCL8, HMGB1, PIK3CG, VEGFA, CXCL10, CXCL11, IL6, IFNG, IL1B, CCL5, CXCR3, CCL4, F2RL1, CCL2, CCR5	105	194	16650	13.8954	3.2623e-10	1.09186e-12	7.20588e-13
GOTERM_BP_FAT	GO:0051336~regulation of hydrolase activity	36	33.6449	7.53573e-14	APP, CSF2, SRC, HMGB1, FGF2, TNF, EGFR, KNG1, HSPD1, AQP1, ICAM1, PTPA, AIFM1, CASP3, CCL5, CCL4, CCL2, FYN, JUN, RIPK3, PRKCD, FN1, MMP9, RHOA, IL2, PTK2, SOD1, VEGFA, IL3, IL6, IL5, IFNG, IL2RA, BAX, TP53, HSPA1A	105	1337	16650	4.26969	3.67347e-10	1.22405e-12	8.0783e-13
GOTERM_BP_FAT	GO:0030003~cellular cation homeostasis	25	23.3645	8.37103e-14	APP, CALCA, HMGB1, PIK3CB, FGF2, HIF1A, PIK3CG, KNG1, CCL5, CXCR3, CCL2, PLCG1, CCR5, CD55, ELANE, TGFB1, F2, IL2, SOD1, CXCL10, CXCL11, BCL2, BAX, F2RL1, GHRL	105	573	16650	6.91847	4.07923e-10	1.35522e-12	8.94393e-13
GOTERM_BP_FAT	GO:0034504~protein localization to nucleus	21	19.6262	8.42619e-14	IL10, XBP1, JUN, TGFB1, SRC, PRKCD, IL18, F2, PTGS2, MAPK14, TNF, RHOA, EGFR, INS, IL6, IFNG, IL1B, FYN, TLR4, TLR3, TLR2	105	363	16650	9.17355	4.10628e-10	1.35963e-12	8.97305e-13
GOTERM_BP_FAT	GO:0070848~response to growth factor	26	24.2991	9.052e-14	APP, CALCA, CXCL8, SRC, FGF2, HIF1A, RELA, EGFR, CASP3, CCL5, CCL2, FYN, PLCG1, IL10, XBP1, JUN, TGFB1, PTPN11, MAPK14, RHOA, PTK2, VEGFA, IL6, IL1B, ITGA5, HSPA1A	105	634	16650	6.50293	4.40925e-10	1.45579e-12	9.60766e-13
GOTERM_BP_FAT	GO:0010628~positive regulation of gene expression	40	37.3832	1.01778e-13	CRP, APP, CSF2, SRC, HMGB1, PIK3CB, FGF2, HIF1A, TNF, RELA, EGFR, INS, CCL5, CXCR3, IL10, XBP1, JUN, TGFB1, IFNB1, IL18, FN1, MAPK14, IL2, NFKB1, KLF2, VEGFA, IL1A, CXCL10, IL6, IL5, IFNG, IL1B, F2RL1, EZR, TP53, TLR4, TLR3, HSPA1A, NFE2L2, TLR2	105	1692	16650	3.74873	4.96108e-10	1.63147e-12	1.07671e-12
GOTERM_BP_FAT	GO:0002700~regulation of production of molecular mediator of immune response	14	13.0841	1.13602e-13	IL10, XBP1, TGFB1, IFNB1, MIF, TNF, IL2, IL6, IL5, IFNG, F2RL1, B2M, TLR4, TLR3	105	107	16650	20.7477	5.53455e-10	1.81502e-12	1.19785e-12
GOTERM_BP_FAT	GO:0009612~response to mechanical stimulus	17	15.8879	1.16607e-13	JUN, TGFB1, SRC, PTGS2, MAPK14, EGFR, RELA, NFKB1, AQP1, CXCL10, IL6, IL1B, CCL2, FYN, TLR5, TLR4, TLR3	105	201	16650	13.4115	5.68062e-10	1.85694e-12	1.22551e-12
GOTERM_BP_FAT	GO:0032757~positive regulation of interleukin-8 production	11	10.2804	1.20793e-13	CALCA, IL1B, F2RL1, TLR5, TNF, TLR4, CAMP, ELANE, TLR3, HSPA1A, TLR2	105	44	16650	39.6429	5.88621e-10	1.91734e-12	1.26537e-12
GOTERM_BP_FAT	GO:0048659~smooth muscle cell proliferation	14	13.0841	1.45081e-13	IL10, XBP1, JUN, MMP2, IL18, PTGS2, FGF2, TNF, MMP9, EGFR, IL6, IFNG, CCL5, ELANE	105	109	16650	20.367	7.07102e-10	2.29539e-12	1.51488e-12
GOTERM_BP_FAT	GO:0006873~cellular ion homeostasis	25	23.3645	1.46776e-13	APP, CALCA, HMGB1, PIK3CB, FGF2, HIF1A, PIK3CG, KNG1, CCL5, CXCR3, CCL2, PLCG1, CCR5, CD55, ELANE, TGFB1, F2, IL2, SOD1, CXCL10, CXCL11, BCL2, BAX, F2RL1, GHRL	105	588	16650	6.74198	7.15217e-10	2.3147e-12	1.52762e-12
GOTERM_BP_FAT	GO:0007169~transmembrane receptor protein tyrosine kinase signaling pathway	26	24.2991	1.47798e-13	APP, SRC, PIK3CB, FGF2, HIF1A, RELA, EGFR, INS, SGPL1, CASP3, CCL2, FYN, PLCG1, XBP1, TGFB1, MMP2, PRKCD, PTPN11, MAPK14, MMP9, RHOA, PTK2, VEGFA, IL1B, GHRL, ITGA5	105	648	16650	6.36243	7.20087e-10	2.32328e-12	1.53328e-12
GOTERM_BP_FAT	GO:0002764~immune response-regulating signaling pathway	24	22.4299	1.48875e-13	JUN, SRC, PRKCD, HMGB1, PIK3CB, RELA, PTK2, NFKB1, HSPD1, CLEC4A, IFNG, IRF3, CD209, BCL2, BAX, F2RL1, FYN, PLCG1, EZR, TLR5, TLR4, TLR3, HSPA1A, TLR2	105	531	16650	7.16707	7.25497e-10	2.3327e-12	1.5395e-12
GOTERM_BP_FAT	GO:1902105~regulation of leukocyte differentiation	18	16.8224	1.67803e-13	XBP1, JUN, CALCA, TGFB1, IFNB1, IL18, HMGB1, AGER, TNF, IL2, SOD1, IL3, IL6, IL5, IFNG, IL2RA, TLR4, TLR3	105	244	16650	11.6979	8.17469e-10	2.62085e-12	1.72966e-12
GOTERM_BP_FAT	GO:0040008~regulation of growth	26	24.2991	1.69709e-13	APP, FGF2, HIF1A, TNF, EGFR, INS, SGPL1, ELANE, CAMP, MBL2, IL10, TGFB1, FN1, PTPN11, MAPK14, F2, IL2, PTK2, SOD1, VEGFA, IFNG, IL9, BCL2, GHRL, EZR, TP53	105	652	16650	6.3234	8.27207e-10	2.64215e-12	1.74372e-12
GOTERM_BP_FAT	GO:0043900~regulation of multi-organism process	21	19.6262	1.71074e-13	IL10, IFITM3, JUN, CXCL8, NOS2, IFNB1, ISG15, MIF, TNF, IFNG, IL2RA, CCL5, CCL4, BCL2, F2RL1, FYN, B2M, CD55, ELANE, CAMP, MBL2	105	377	16650	8.83289	8.33699e-10	2.65492e-12	1.75215e-12
GOTERM_BP_FAT	GO:0070665~positive regulation of leukocyte proliferation	15	14.0187	1.72184e-13	IL18, HMGB1, MIF, AGER, IL2, IL3, IL6, IL5, IFNG, IL1B, IL2RA, CCL5, BCL2, TLR4, CD55	105	139	16650	17.112	8.39109e-10	2.66365e-12	1.75791e-12
GOTERM_BP_FAT	GO:0002460~adaptive immune response based on somatic recombination of immune receptors built from immunoglobulin superfamily domains	19	17.757	1.7508e-13	IL10, TGFB1, RIPK3, IFNB1, PRKCD, IL18, HMGB1, AGER, TNF, IL2, HSPD1, ICAM1, IL6, IFNG, IL1B, B2M, TLR4, CD55, MBL2	105	286	16650	10.5345	8.53175e-10	2.69989e-12	1.78183e-12
GOTERM_BP_FAT	GO:0033036~macromolecule localization	51	47.6636	1.76136e-13	HMGB1, TNF, GLUL, CAMP, IL10, SIGMAR1, PRKCD, IL18, MIF, ACTN4, F2, RHOA, IL1A, IFNG, IRF3, IL1B, EZR, TLR5, TLR4, TP53, TLR3, TLR2, CRP, ABCB1, SRC, PTGS2, HIF1A, AGER, EGFR, HSPD1, INS, CCL5, CCL2, FYN, JUN, XBP1, TGFB1, NOS2, FN1, PTPN11, MAPK14, NFKB1, IL2, VEGFA, IL6, IL5, ALB, BCL2, BAX, F2RL1, GHRL	105	2817	16650	2.87084	8.58045e-10	2.70761e-12	1.78692e-12
GOTERM_BP_FAT	GO:0035821~modification of morphology or physiology of other organism	14	13.0841	2.07689e-13	JUN, TGFB1, NOS2, DEFA1, AQP1, IFNG, CD209, CCL5, CCL4, ALB, F2RL1, ELANE, CAMP, MBL2	105	112	16650	19.8214	1.01223e-09	3.17263e-12	2.09382e-12
GOTERM_BP_FAT	GO:0001906~cell killing	14	13.0841	2.07689e-13	IL10, NOS2, RIPK3, DEFA1, AGER, ICAM1, IFNG, ALB, F2RL1, CCL2, B2M, ELANE, CAMP, MBL2	105	112	16650	19.8214	1.01223e-09	3.17263e-12	2.09382e-12
GOTERM_BP_FAT	GO:0042098~T cell proliferation	16	14.9533	2.24062e-13	IL10, TGFB1, RIPK3, IL18, HMGB1, AGER, IL2, PIK3CG, IL6, IFNG, IL1B, IL2RA, CCL5, BAX, FYN, CD55	105	174	16650	14.5813	1.09176e-09	3.41205e-12	2.25183e-12
GOTERM_BP_FAT	GO:0050870~positive regulation of T cell activation	17	15.8879	2.30791e-13	XBP1, TGFB1, SRC, IL18, PTPN11, HMGB1, AGER, IL2, HSPD1, IL6, IFNG, IL1B, IL2RA, CCL5, CCL2, FYN, CD55	105	210	16650	12.8367	1.12476e-09	3.50357e-12	2.31223e-12
GOTERM_BP_FAT	GO:0048660~regulation of smooth muscle cell proliferation	14	13.0841	2.33504e-13	IL10, XBP1, JUN, MMP2, IL18, PTGS2, FGF2, TNF, MMP9, EGFR, IL6, IFNG, CCL5, ELANE	105	113	16650	19.646	1.13775e-09	3.53374e-12	2.33214e-12
GOTERM_BP_FAT	GO:0045089~positive regulation of innate immune response	19	17.757	2.49821e-13	IFNB1, SRC, MMP2, PRKCD, HMGB1, RELA, NFKB1, HSPD1, CLEC4A, IRF3, CD209, CCL5, F2RL1, FYN, TLR5, TLR4, TLR3, HSPA1A, TLR2	105	292	16650	10.318	1.21728e-09	3.76897e-12	2.48738e-12
GOTERM_BP_FAT	GO:1904018~positive regulation of vasculature development	15	14.0187	2.55851e-13	XBP1, CXCL8, HMGB1, PTGS2, FGF2, HIF1A, AQP1, VEGFA, IL1A, IL1B, CXCR3, PLCG1, ITGA5, CAMP, NFE2L2	105	143	16650	16.6334	1.24703e-09	3.8405e-12	2.53459e-12
GOTERM_BP_FAT	GO:0045184~establishment of protein localization	43	40.1869	2.56138e-13	CRP, SRC, HMGB1, PTGS2, HIF1A, TNF, EGFR, HSPD1, INS, CCL5, CCL2, GLUL, CAMP, IL10, XBP1, JUN, TGFB1, NOS2, PRKCD, IL18, FN1, PTPN11, ACTN4, MIF, MAPK14, RHOA, IL2, IL1A, IL6, IL5, IFNG, IRF3, IL1B, BCL2, BAX, F2RL1, GHRL, EZR, TLR5, TP53, TLR4, TLR3, TLR2	105	2021	16650	3.37386	1.24811e-09	3.8405e-12	2.53459e-12
GOTERM_BP_FAT	GO:0032755~positive regulation of interleukin-6 production	12	11.215	2.65326e-13	IL1A, IL6, XBP1, IFNG, IL1B, F2RL1, HMGB1, TNF, TLR4, TLR3, HSPD1, TLR2	105	66	16650	28.8312	1.29302e-09	3.96606e-12	2.61745e-12
GOTERM_BP_FAT	GO:0051128~regulation of cellular component organization	46	42.9907	2.82841e-13	CSF2, SRC, HMGB1, PIK3CB, FGF2, HIF1A, TNF, EGFR, INS, ICAM1, AIFM1, CCL2, FYN, B2M, MBL2, IL10, XBP1, JUN, TGFB1, PRKCD, FN1, PTPN11, ACTN4, MAPK14, F2, MMP9, RHOA, IL2, PTK2, VEGFA, IL1A, CXCL10, IL6, IL5, IFNG, IL1B, IL9, BCL2, BAX, F2RL1, GHRL, EZR, TP53, TLR4, HSPA1A, NFE2L2	105	2323	16650	3.14003	1.3785e-09	4.21493e-12	2.7817e-12
GOTERM_BP_FAT	GO:0046822~regulation of nucleocytoplasmic transport	17	15.8879	3.09391e-13	IL10, XBP1, TGFB1, PRKCD, IL18, PTPN11, PTGS2, MAPK14, TNF, RHOA, EGFR, IL6, IL1B, TP53, TLR4, TLR3, TLR2	105	214	16650	12.5968	1.5078e-09	4.59653e-12	3.03354e-12
GOTERM_BP_FAT	GO:0009968~negative regulation of signal transduction	32	29.9065	3.46139e-13	CALCA, CSF2, CXCL8, SRC, HIF1A, TNF, AGER, RELA, EGFR, INS, ICAM1, CCL5, FYN, IL10, XBP1, TGFB1, PRKCD, MIF, MAPK14, SOD2, MMP9, IL1A, IL6, IL1B, BCL2, BAX, F2RL1, EZR, TLR4, TLR3, HSPA1A, NFE2L2	105	1089	16650	4.65958	1.68687e-09	5.12686e-12	3.38354e-12
GOTERM_BP_FAT	GO:0002757~immune response-activating signal transduction	23	21.4953	3.67988e-13	SRC, PRKCD, HMGB1, PIK3CB, RELA, PTK2, NFKB1, HSPD1, CLEC4A, IFNG, IRF3, CD209, BCL2, BAX, F2RL1, FYN, PLCG1, EZR, TLR5, TLR4, TLR3, HSPA1A, TLR2	105	498	16650	7.32358	1.79345e-09	5.43396e-12	3.58621e-12
GOTERM_BP_FAT	GO:0043406~positive regulation of MAP kinase activity	17	15.8879	3.83885e-13	TGFB1, SRC, PTPN11, PIK3CB, MIF, MAPK14, FGF2, AGER, TNF, EGFR, PIK3CG, SOD1, VEGFA, IL1B, GHRL, TLR4, ELANE	105	217	16650	12.4226	1.87082e-09	5.65158e-12	3.72983e-12
GOTERM_BP_FAT	GO:0031663~lipopolysaccharide-mediated signaling pathway	11	10.2804	3.89956e-13	TGFB1, IRF3, CCL5, IL1B, IL18, CCL2, MIF, MAPK14, TNF, TLR4, TLR2	105	49	16650	35.5977	1.90003e-09	5.72366e-12	3.7774e-12
GOTERM_BP_FAT	GO:0071902~positive regulation of protein serine/threonine kinase activity	19	17.757	3.96229e-13	TGFB1, SRC, PTPN11, PIK3CB, MIF, MAPK14, FGF2, AGER, TNF, RHOA, EGFR, PIK3CG, SOD1, VEGFA, IL1B, GHRL, TLR4, ELANE, TLR3	105	300	16650	10.0429	1.93087e-09	5.79828e-12	3.82665e-12
GOTERM_BP_FAT	GO:0008104~protein localization	47	43.9252	3.99184e-13	CRP, SRC, HMGB1, PTGS2, HIF1A, TNF, AGER, EGFR, HSPD1, INS, CCL5, CCL2, FYN, GLUL, CAMP, IL10, XBP1, JUN, TGFB1, NOS2, PRKCD, IL18, FN1, PTPN11, ACTN4, MIF, MAPK14, F2, RHOA, IL2, VEGFA, IL1A, IL6, IL5, IFNG, IRF3, IL1B, BCL2, BAX, F2RL1, GHRL, EZR, TLR5, TP53, TLR4, TLR3, TLR2	105	2448	16650	3.04447	1.94548e-09	5.82402e-12	3.84364e-12
GOTERM_BP_FAT	GO:0015031~protein transport	41	38.3178	4.15443e-13	CRP, SRC, HMGB1, PTGS2, HIF1A, TNF, EGFR, HSPD1, INS, CCL5, CCL2, GLUL, CAMP, IL10, XBP1, JUN, TGFB1, NOS2, PRKCD, IL18, FN1, PTPN11, ACTN4, MIF, MAPK14, RHOA, IL2, IL1A, IL6, IL5, IFNG, IRF3, IL1B, F2RL1, GHRL, EZR, TLR5, TP53, TLR4, TLR3, TLR2	105	1860	16650	3.49539	2.02447e-09	6.04315e-12	3.98825e-12
GOTERM_BP_FAT	GO:0018193~peptidyl-amino acid modification	33	30.8411	5.3978e-13	APP, CSF2, IFNA1, SRC, FGF2, TNF, EGFR, INS, ICAM1, PTPA, CCL5, FYN, TGFB1, NOS2, IFNB1, PRKCD, IL18, MIF, MAPK14, F2, IL2, PTK2, VEGFA, IL3, IL6, IL5, IFNG, IL1B, BCL2, BAX, GHRL, ITGA5, TP53	105	1185	16650	4.41591	2.6304e-09	7.82842e-12	5.16647e-12
GOTERM_BP_FAT	GO:0050921~positive regulation of chemotaxis	14	13.0841	5.72929e-13	TGFB1, CXCL8, HMGB1, FGF2, AGER, VEGFA, CXCL10, CXCL11, IL6, CCL5, CXCR3, CCL4, F2RL1, CCL2	105	121	16650	18.3471	2.79162e-09	8.28453e-12	5.46748e-12
GOTERM_BP_FAT	GO:0032655~regulation of interleukin-12 production	11	10.2804	6.00025e-13	IL10, IFNG, HMGB1, MAPK14, AGER, TLR4, RELA, NFKB1, TLR3, HSPD1, TLR2	105	51	16650	34.2017	2.92417e-09	8.65065e-12	5.70911e-12
GOTERM_BP_FAT	GO:0048872~homeostasis of number of cells	17	15.8879	6.27145e-13	TGFB1, RIPK3, ISG15, PTPN11, HMGB1, MIF, MAPK14, HIF1A, KLF2, SOD1, VEGFA, IL6, IFNG, CASP3, IL2RA, BCL2, BAX	105	224	16650	12.0344	3.05617e-09	9.01498e-12	5.94956e-12
GOTERM_BP_FAT	GO:0032722~positive regulation of chemokine production	11	10.2804	7.39087e-13	IL1A, IL6, IFNG, IL1B, MIF, AGER, HIF1A, TNF, TLR4, TLR3, TLR2	105	52	16650	33.544	3.60151e-09	1.05929e-11	6.99089e-12
GOTERM_BP_FAT	GO:0033002~muscle cell proliferation	15	14.0187	7.83945e-13	IL10, XBP1, JUN, MMP2, IL18, PTGS2, MAPK14, FGF2, TNF, MMP9, EGFR, IL6, IFNG, CCL5, ELANE	105	155	16650	15.3456	3.82008e-09	1.12028e-11	7.39345e-12
GOTERM_BP_FAT	GO:0007204~positive regulation of cytosolic calcium ion concentration	18	16.8224	8.20807e-13	CALCA, TGFB1, HMGB1, F2, FGF2, IL2, PIK3CG, KNG1, CXCL10, CXCL11, CXCR3, BCL2, BAX, F2RL1, GHRL, PLCG1, CCR5, CD55	105	269	16650	10.6107	3.9997e-09	1.16724e-11	7.70334e-12
GOTERM_BP_FAT	GO:0034599~cellular response to oxidative stress	17	15.8879	8.2399e-13	XBP1, SRC, PRKCD, SOD2, HIF1A, TNF, RELA, KLF2, AQP1, INS, SOD1, IL6, AIFM1, BCL2, TP53, HSPA1A, NFE2L2	105	228	16650	11.8233	4.01539e-09	1.16724e-11	7.70334e-12
GOTERM_BP_FAT	GO:0010631~epithelial cell migration	17	15.8879	8.2399e-13	JUN, CALCA, TGFB1, SRC, PTPN11, HMGB1, PTGS2, MAPK14, FGF2, HIF1A, MMP9, RHOA, PTK2, VEGFA, IFNG, PLCG1, NFE2L2	105	228	16650	11.8233	4.01539e-09	1.16724e-11	7.70334e-12
GOTERM_BP_FAT	GO:0042542~response to hydrogen peroxide	14	13.0841	8.75828e-13	JUN, SRC, PRKCD, SOD2, RELA, KLF2, HSPD1, AQP1, SOD1, IL6, AIFM1, CASP3, BCL2, NFE2L2	105	125	16650	17.76	4.26804e-09	1.23708e-11	8.16424e-12
GOTERM_BP_FAT	GO:0042035~regulation of cytokine biosynthetic process	13	12.1495	9.57628e-13	IL10, TNF, RELA, NFKB1, IL1A, IL6, IFNG, IL1B, IL9, GHRL, TLR4, ELANE, TLR3	105	98	16650	21.035	4.66677e-09	1.34763e-11	8.89389e-12
GOTERM_BP_FAT	GO:0051649~establishment of localization in cell	42	39.2523	9.59633e-13	APP, CALCA, SRC, PTGS2, FGF2, HIF1A, TNF, EGFR, PIK3CG, INS, CXCR3, CCL2, PLCG1, CCR5, CD55, IL10, XBP1, JUN, TGFB1, PRKCD, IL18, PTPN11, ACTN4, MAPK14, F2, RHOA, PTK2, SOD1, CXCL10, CXCL11, IL6, IFNG, CD209, IL1B, BCL2, BAX, CRYAA, EZR, TP53, TLR4, TLR3, TLR2	105	2004	16650	3.32335	4.6765e-09	1.34763e-11	8.89389e-12
GOTERM_BP_FAT	GO:0090132~epithelium migration	17	15.8879	1.00762e-12	JUN, CALCA, TGFB1, SRC, PTPN11, HMGB1, PTGS2, MAPK14, FGF2, HIF1A, MMP9, RHOA, PTK2, VEGFA, IFNG, PLCG1, NFE2L2	105	231	16650	11.6698	4.91022e-09	1.41096e-11	9.31183e-12
GOTERM_BP_FAT	GO:0031960~response to corticosteroid	15	14.0187	1.02175e-12	IL10, TGFB1, IFNB1, SRC, HMGB1, PTGS2, TNF, EGFR, HSPD1, AQP1, IL6, AIFM1, CASP3, BCL2, CCL2	105	158	16650	15.0542	4.97893e-09	1.42664e-11	9.4153e-12
GOTERM_BP_FAT	GO:0010035~response to inorganic substance	22	20.5607	1.05275e-12	APP, JUN, CSF2, SRC, PRKCD, PTGS2, SOD2, TNF, EGFR, RELA, KLF2, HSPD1, AQP1, ICAM1, SOD1, IL1A, IL6, AIFM1, CASP3, BCL2, B2M, NFE2L2	105	469	16650	7.43832	5.12987e-09	1.46573e-11	9.67325e-12
GOTERM_BP_FAT	GO:0051091~positive regulation of sequence-specific DNA binding transcription factor activity	17	15.8879	1.15045e-12	IL10, TGFB1, RIPK3, AGER, TNF, RELA, NFKB1, INS, ICAM1, VEGFA, IL6, IL5, IL1B, TLR4, TLR3, HSPA1A, TLR2	105	233	16650	11.5696	5.60596e-09	1.59719e-11	1.05409e-11
GOTERM_BP_FAT	GO:0051345~positive regulation of hydrolase activity	29	27.1028	1.20195e-12	APP, CSF2, HMGB1, FGF2, TNF, EGFR, HSPD1, ICAM1, PTPA, AIFM1, CASP3, CCL5, CCL4, CCL2, FYN, JUN, RIPK3, PRKCD, FN1, RHOA, IL2, PTK2, VEGFA, IL3, IL5, IFNG, IL2RA, BAX, HSPA1A	105	917	16650	5.0148	5.85699e-09	1.66394e-11	1.09814e-11
GOTERM_BP_FAT	GO:0090130~tissue migration	17	15.8879	1.49402e-12	JUN, CALCA, TGFB1, SRC, PTPN11, HMGB1, PTGS2, MAPK14, FGF2, HIF1A, MMP9, RHOA, PTK2, VEGFA, IFNG, PLCG1, NFE2L2	105	237	16650	11.3743	7.28039e-09	2.06243e-11	1.36113e-11
GOTERM_BP_FAT	GO:0071887~leukocyte apoptotic process	13	12.1495	1.56028e-12	IL10, RIPK3, MIF, HIF1A, IL2, ICAM1, IL6, IFNG, IRF3, IL2RA, CCL5, BAX, TP53	105	102	16650	20.2101	7.60338e-09	2.14781e-11	1.41747e-11
GOTERM_BP_FAT	GO:1902107~positive regulation of leukocyte differentiation	14	13.0841	1.61103e-12	XBP1, JUN, CALCA, TGFB1, IL18, HMGB1, AGER, TNF, IL2, IL3, IL6, IL5, IFNG, IL2RA	105	131	16650	16.9466	7.85062e-09	2.21142e-11	1.45945e-11
GOTERM_BP_FAT	GO:0043405~regulation of MAP kinase activity	19	17.757	1.70714e-12	TGFB1, SRC, PRKCD, PTPN11, PIK3CB, MIF, MAPK14, FGF2, AGER, TNF, EGFR, PIK3CG, SOD1, VEGFA, IL1B, GHRL, PLCG1, TLR4, ELANE	105	327	16650	9.21363	8.31914e-09	2.33078e-11	1.53823e-11
GOTERM_BP_FAT	GO:0002699~positive regulation of immune effector process	15	14.0187	1.70755e-12	XBP1, TGFB1, IL18, MIF, TNF, IL2, HSPD1, IL6, IL5, IFNG, IL1B, F2RL1, CCL2, B2M, TLR4	105	164	16650	14.5035	8.32076e-09	2.33078e-11	1.53823e-11
GOTERM_BP_FAT	GO:0040007~growth	29	27.1028	1.77782e-12	APP, FGF2, HIF1A, TNF, EGFR, INS, SGPL1, ELANE, CAMP, MBL2, IL10, XBP1, TGFB1, FN1, PTPN11, MAPK14, F2, IL2, PTK2, KLF2, SOD1, VEGFA, IL6, IFNG, IL9, BCL2, GHRL, EZR, TP53	105	932	16650	4.93409	8.66322e-09	2.41327e-11	1.59267e-11
GOTERM_BP_FAT	GO:0050671~positive regulation of lymphocyte proliferation	14	13.0841	1.77789e-12	IL18, HMGB1, MIF, AGER, IL2, IL6, IL5, IFNG, IL1B, IL2RA, CCL5, BCL2, TLR4, CD55	105	132	16650	16.8182	8.66376e-09	2.41327e-11	1.59267e-11
GOTERM_BP_FAT	GO:0051092~positive regulation of NF-kappaB transcription factor activity	14	13.0841	1.96044e-12	TGFB1, RIPK3, AGER, TNF, RELA, NFKB1, INS, ICAM1, IL6, IL1B, TLR4, TLR3, HSPA1A, TLR2	105	133	16650	16.6917	9.55318e-09	2.64632e-11	1.74647e-11
GOTERM_BP_FAT	GO:0032946~positive regulation of mononuclear cell proliferation	14	13.0841	1.96044e-12	IL18, HMGB1, MIF, AGER, IL2, IL6, IL5, IFNG, IL1B, IL2RA, CCL5, BCL2, TLR4, CD55	105	133	16650	16.6917	9.55318e-09	2.64632e-11	1.74647e-11
GOTERM_BP_FAT	GO:0043903~regulation of symbiosis, encompassing mutualism through parasitism	18	16.8224	2.08381e-12	IL10, IFITM3, JUN, CXCL8, IFNB1, ISG15, TNF, IFNG, IL2RA, CCL5, CCL4, BCL2, F2RL1, FYN, B2M, ELANE, CAMP, MBL2	105	285	16650	10.015	1.01542e-08	2.80508e-11	1.85125e-11
GOTERM_BP_FAT	GO:0010632~regulation of epithelial cell migration	15	14.0187	2.57917e-12	JUN, TGFB1, SRC, HMGB1, PTGS2, MAPK14, FGF2, HIF1A, MMP9, RHOA, PTK2, VEGFA, IFNG, PLCG1, NFE2L2	105	169	16650	14.0744	1.25682e-08	3.45613e-11	2.28092e-11
GOTERM_BP_FAT	GO:0048468~cell development	41	38.3178	2.58163e-12	APP, SRC, HMGB1, FGF2, HIF1A, TNF, AGER, RELA, EGFR, INS, ICAM1, CASP3, FYN, B2M, XBP1, JUN, TGFB1, FN1, PTPN11, ACTN4, F2, SOD2, RHOA, IL2, PTK2, KLF2, SOD1, VEGFA, IL1A, IL6, IL5, IFNG, IL1B, BCL2, BAX, F2RL1, GHRL, EZR, TLR4, NFE2L2, TLR2	105	1968	16650	3.30357	1.25801e-08	3.45613e-11	2.28092e-11
GOTERM_BP_FAT	GO:0051093~negative regulation of developmental process	26	24.2991	2.72009e-12	APP, CALCA, HMGB1, HIF1A, TNF, EGFR, CXCR3, CCL2, B2M, XBP1, TGFB1, IFNB1, IL18, ACTN4, MIF, F2, RHOA, PTK2, CXCL10, IL6, IFNG, BCL2, GHRL, TLR4, TLR3, NFE2L2	105	739	16650	5.57897	1.32548e-08	3.6315e-11	2.39666e-11
GOTERM_BP_FAT	GO:0051480~regulation of cytosolic calcium ion concentration	18	16.8224	3.07575e-12	CALCA, TGFB1, HMGB1, F2, FGF2, IL2, PIK3CG, KNG1, CXCL10, CXCL11, CXCR3, BCL2, BAX, F2RL1, GHRL, PLCG1, CCR5, CD55	105	292	16650	9.77495	1.49882e-08	4.09512e-11	2.70263e-11
GOTERM_BP_FAT	GO:0002526~acute inflammatory response	14	13.0841	3.15824e-12	CRP, FN1, F2, PTGS2, TNF, PIK3CG, INS, ICAM1, IL1A, IL6, IL1B, CD55, ELANE, MBL2	105	138	16650	16.087	1.53902e-08	4.19349e-11	2.76755e-11
GOTERM_BP_FAT	GO:0042306~regulation of protein import into nucleus	15	14.0187	3.28204e-12	IL10, XBP1, TGFB1, PRKCD, IL18, PTGS2, MAPK14, TNF, RHOA, EGFR, IL6, IL1B, TLR4, TLR3, TLR2	105	172	16650	13.8289	1.59934e-08	4.34602e-11	2.86821e-11
GOTERM_BP_FAT	GO:1904589~regulation of protein import	15	14.0187	4.15723e-12	IL10, XBP1, TGFB1, PRKCD, IL18, PTGS2, MAPK14, TNF, RHOA, EGFR, IL6, IL1B, TLR4, TLR3, TLR2	105	175	16650	13.5918	2.02582e-08	5.49003e-11	3.62321e-11
GOTERM_BP_FAT	GO:0045944~positive regulation of transcription from RNA polymerase II promoter	30	28.0374	4.18743e-12	APP, HMGB1, FGF2, HIF1A, TNF, RELA, EGFR, CXCR3, IL10, XBP1, JUN, TGFB1, IFNB1, IL18, MAPK14, IL2, NFKB1, KLF2, VEGFA, IL1A, CXCL10, IL6, IFNG, IL1B, F2RL1, TP53, TLR4, TLR3, NFE2L2, TLR2	105	1041	16650	4.56978	2.04053e-08	5.51496e-11	3.63967e-11
GOTERM_BP_FAT	GO:0032845~negative regulation of homeostatic process	15	14.0187	4.49351e-12	CALCA, TGFB1, SRC, MIF, F2, FGF2, CXCL10, CXCL11, IL6, CXCR3, BCL2, BAX, GHRL, PLCG1, CCR5	105	176	16650	13.5146	2.18969e-08	5.90212e-11	3.89518e-11
GOTERM_BP_FAT	GO:0050673~epithelial cell proliferation	19	17.757	4.62624e-12	XBP1, JUN, CALCA, TGFB1, HMGB1, PIK3CB, FGF2, HIF1A, TNF, EGFR, VEGFA, IL6, IFNG, CCL5, CXCR3, BAX, CCL2, GHRL, GLUL	105	347	16650	8.68259	2.25434e-08	6.06013e-11	3.99946e-11
GOTERM_BP_FAT	GO:0043491~protein kinase B signaling	14	13.0841	4.99373e-12	XBP1, TGFB1, SRC, IL18, FGF2, TNF, EGFR, PIK3CG, PTK2, INS, IL6, IL1B, CCL5, CCL2	105	143	16650	15.5245	2.43347e-08	6.52398e-11	4.30559e-11
GOTERM_BP_FAT	GO:0070555~response to interleukin-1	13	12.1495	5.99791e-12	CXCL8, SRC, HIF1A, RELA, NFKB1, KLF2, ICAM1, IL1A, IL6, CCL5, CCL4, CCL2, CAMP	105	114	16650	18.0827	2.92276e-08	7.81493e-11	5.15756e-11
GOTERM_BP_FAT	GO:0031667~response to nutrient levels	20	18.6916	6.15515e-12	XBP1, JUN, TGFB1, SRC, PTGS2, SOD2, EGFR, RELA, ICAM1, SOD1, CXCL10, IL6, AIFM1, ALB, BCL2, CCL2, GHRL, GLUL, TP53, NFE2L2	105	404	16650	7.85007	2.99942e-08	7.99841e-11	5.27865e-11
GOTERM_BP_FAT	GO:0051641~cellular localization	46	42.9907	6.90757e-12	APP, CALCA, SRC, PTGS2, FGF2, HIF1A, TNF, AGER, EGFR, PIK3CG, INS, CXCR3, CCL2, FYN, PLCG1, CCR5, CD55, IL10, XBP1, JUN, TGFB1, PRKCD, IL18, PTPN11, ACTN4, MAPK14, F2, RHOA, PTK2, SOD1, VEGFA, CXCL10, CXCL11, IL6, IFNG, CD209, IL1B, ALB, BCL2, BAX, CRYAA, EZR, TP53, TLR4, TLR3, TLR2	105	2541	16650	2.87064	3.36607e-08	8.95229e-11	5.90818e-11
GOTERM_BP_FAT	GO:0071347~cellular response to interleukin-1	12	11.215	7.05925e-12	IL1A, IL6, CXCL8, CCL5, CCL4, CCL2, HIF1A, RELA, CAMP, NFKB1, KLF2, ICAM1	105	88	16650	21.6234	3.43997e-08	9.1246e-11	6.0219e-11
GOTERM_BP_FAT	GO:0002274~myeloid leukocyte activation	14	13.0841	7.11447e-12	IL10, JUN, TGFB1, CXCL8, CSF2, PRKCD, HMGB1, PIK3CG, HSPD1, CCL5, F2RL1, TLR4, TLR3, TLR2	105	147	16650	15.102	3.46686e-08	9.17165e-11	6.05295e-11
GOTERM_BP_FAT	GO:0002706~regulation of lymphocyte mediated immunity	13	12.1495	7.39308e-12	IL10, TGFB1, RIPK3, IFNB1, HMGB1, AGER, TNF, IL2, HSPD1, IL6, IFNG, IL1B, B2M	105	116	16650	17.7709	3.60265e-08	9.50566e-11	6.27339e-11
GOTERM_BP_FAT	GO:0032269~negative regulation of cellular protein metabolic process	29	27.1028	7.91214e-12	APP, SRC, TNF, EGFR, KNG1, AQP1, INS, PTPA, FYN, CD55, IL10, XBP1, JUN, TGFB1, PRKCD, ISG15, MIF, F2, MMP9, IL2, NFKB1, VEGFA, IL6, IL1B, BAX, F2RL1, EZR, TLR4, HSPA1A	105	992	16650	4.63566	3.85557e-08	1.01463e-10	6.69617e-11
GOTERM_BP_FAT	GO:0002822~regulation of adaptive immune response based on somatic recombination of immune receptors built from immunoglobulin superfamily domains	13	12.1495	8.19585e-12	IL10, TGFB1, RIPK3, IFNB1, HMGB1, AGER, TNF, IL2, HSPD1, IL6, IFNG, IL1B, B2M	105	117	16650	17.619	3.99386e-08	1.04825e-10	6.91807e-11
GOTERM_BP_FAT	GO:0048015~phosphatidylinositol-mediated signaling	15	14.0187	8.23114e-12	XBP1, IL18, PTPN11, PIK3CB, F2, FGF2, RHOA, EGFR, PIK3CG, PTK2, INS, CCL5, F2RL1, FYN, EZR	105	184	16650	12.927	4.01106e-08	1.05001e-10	6.92967e-11
GOTERM_BP_FAT	GO:0048010~vascular endothelial growth factor receptor signaling pathway	12	11.215	9.08247e-12	XBP1, SRC, IL1B, CCL2, FYN, PIK3CB, ITGA5, MAPK14, HIF1A, PTK2, RHOA, VEGFA	105	90	16650	21.1429	4.42591e-08	1.15558e-10	7.62643e-11
GOTERM_BP_FAT	GO:0097191~extrinsic apoptotic signaling pathway	16	14.9533	9.44854e-12	TGFB1, CSF2, SRC, TNF, IL2, RELA, ICAM1, IL1A, IFNG, IL1B, CASP3, BCL2, BAX, FYN, TLR3, HSPA1A	105	225	16650	11.2762	4.60428e-08	1.19903e-10	7.91316e-11
GOTERM_BP_FAT	GO:0050920~regulation of chemotaxis	15	14.0187	9.53231e-12	TGFB1, CXCL8, HMGB1, FGF2, AGER, VEGFA, CXCL10, CXCL11, IL6, CCL5, CXCR3, CCL4, F2RL1, CCL2, ELANE	105	186	16650	12.788	4.64507e-08	1.20652e-10	7.96257e-11
GOTERM_BP_FAT	GO:0042129~regulation of T cell proliferation	14	13.0841	1.00301e-11	IL10, TGFB1, RIPK3, IL18, HMGB1, AGER, IL2, IL6, IFNG, CD209, IL1B, IL2RA, CCL5, CD55	105	151	16650	14.702	4.88766e-08	1.26624e-10	8.35669e-11
GOTERM_BP_FAT	GO:0016192~vesicle-mediated transport	35	32.7103	1.01102e-11	CRP, APP, CALCA, CXCL8, SRC, HMGB1, PIK3CB, TNF, EGFR, PIK3CG, KNG1, INS, CCL5, MRC1, CCL2, FYN, PLCG1, B2M, CD55, ELANE, MBL2, TGFB1, PRKCD, FN1, ACTN4, F2, PTK2, SOD1, VEGFA, IFNG, CD209, IL1B, ALB, F2RL1, EZR	105	1494	16650	3.71486	4.92672e-08	1.27305e-10	8.40167e-11
GOTERM_BP_FAT	GO:0048017~inositol lipid-mediated signaling	15	14.0187	1.02514e-11	XBP1, IL18, PTPN11, PIK3CB, F2, FGF2, RHOA, EGFR, PIK3CG, PTK2, INS, CCL5, F2RL1, FYN, EZR	105	187	16650	12.7196	4.99549e-08	1.2875e-10	8.49704e-11
GOTERM_BP_FAT	GO:0032386~regulation of intracellular transport	21	19.6262	1.06673e-11	IL10, XBP1, TGFB1, SRC, PRKCD, IL18, PTPN11, PTGS2, MAPK14, TNF, RHOA, EGFR, IL6, IL1B, CCL2, CRYAA, EZR, TP53, TLR4, TLR3, TLR2	105	472	16650	7.05508	5.1982e-08	1.3363e-10	8.81906e-11
GOTERM_BP_FAT	GO:2001242~regulation of intrinsic apoptotic signaling pathway	14	13.0841	1.09122e-11	XBP1, RIPK3, SRC, MIF, SOD2, HIF1A, MMP9, INS, SOD1, BCL2, BAX, TP53, HSPA1A, NFE2L2	105	152	16650	14.6053	5.31755e-08	1.36347e-10	8.99839e-11
GOTERM_BP_FAT	GO:0048871~multicellular organismal homeostasis	18	16.8224	1.13921e-11	CALCA, SRC, PTPN11, PTGS2, TNF, EGFR, AQP1, SOD1, VEGFA, IL1A, IL6, IL1B, ALB, BCL2, BAX, GHRL, B2M, TLR4	105	317	16650	9.00406	5.55137e-08	1.41979e-10	9.37006e-11
GOTERM_BP_FAT	GO:0051607~defense response to virus	16	14.9533	1.21634e-11	IFITM3, IFNA1, IFNB1, ISG15, DEFA1, RELA, CXCL10, IL6, IFNG, IRF3, IL2RA, BCL2, F2RL1, FYN, B2M, TLR3	105	229	16650	11.0792	5.92722e-08	1.51205e-10	9.97898e-11
GOTERM_BP_FAT	GO:0071900~regulation of protein serine/threonine kinase activity	21	19.6262	1.24254e-11	TGFB1, SRC, PRKCD, PTPN11, PIK3CB, MIF, MAPK14, FGF2, AGER, TNF, RHOA, EGFR, PIK3CG, SOD1, VEGFA, IL1B, GHRL, PLCG1, TLR4, ELANE, TLR3	105	476	16650	6.9958	6.05489e-08	1.54069e-10	1.0168e-10
GOTERM_BP_FAT	GO:0001667~ameboidal-type cell migration	18	16.8224	1.32259e-11	JUN, CALCA, TGFB1, SRC, PTPN11, HMGB1, PTGS2, MAPK14, FGF2, HIF1A, MMP9, RHOA, PTK2, VEGFA, SGPL1, IFNG, PLCG1, NFE2L2	105	320	16650	8.91964	6.44496e-08	1.63578e-10	1.07956e-10
GOTERM_BP_FAT	GO:0006953~acute-phase response	10	9.34579	1.39386e-11	CRP, IL1A, IL6, IL1B, FN1, F2, PTGS2, TNF, MBL2, INS	105	48	16650	33.0357	6.79224e-08	1.71956e-10	1.13485e-10
GOTERM_BP_FAT	GO:0051090~regulation of sequence-specific DNA binding transcription factor activity	19	17.757	1.54026e-11	IL10, JUN, TGFB1, RIPK3, MAPK14, AGER, TNF, RELA, NFKB1, INS, ICAM1, VEGFA, IL6, IL5, IL1B, TLR4, TLR3, HSPA1A, TLR2	105	373	16650	8.07736	7.50573e-08	1.89538e-10	1.25088e-10
GOTERM_BP_FAT	GO:0032735~positive regulation of interleukin-12 production	9	8.41121	1.63761e-11	IFNG, HMGB1, MAPK14, AGER, TLR4, RELA, TLR3, HSPD1, TLR2	105	32	16650	44.5982	7.98008e-08	2.0101e-10	1.32659e-10
GOTERM_BP_FAT	GO:0097193~intrinsic apoptotic signaling pathway	17	15.8879	1.78098e-11	XBP1, RIPK3, SRC, PRKCD, MIF, SOD2, HIF1A, TNF, MMP9, INS, SOD1, AIFM1, BCL2, BAX, TP53, HSPA1A, NFE2L2	105	279	16650	9.66206	8.67875e-08	2.18058e-10	1.43911e-10
GOTERM_BP_FAT	GO:0002573~myeloid leukocyte differentiation	15	14.0187	1.80675e-11	JUN, CALCA, TGFB1, CSF2, SRC, MAPK14, TNF, MMP9, VEGFA, IL3, IL5, IFNG, F2RL1, TLR4, TLR3	105	195	16650	12.1978	8.80432e-08	2.2066e-10	1.45627e-10
GOTERM_BP_FAT	GO:0006606~protein import into nucleus	17	15.8879	1.87942e-11	IL10, XBP1, JUN, TGFB1, PRKCD, IL18, PTGS2, MAPK14, TNF, RHOA, EGFR, IL6, IFNG, IL1B, TLR4, TLR3, TLR2	105	280	16650	9.62755	9.15846e-08	2.27822e-10	1.50354e-10
GOTERM_BP_FAT	GO:0044744~protein targeting to nucleus	17	15.8879	1.87942e-11	IL10, XBP1, JUN, TGFB1, PRKCD, IL18, PTGS2, MAPK14, TNF, RHOA, EGFR, IL6, IFNG, IL1B, TLR4, TLR3, TLR2	105	280	16650	9.62755	9.15846e-08	2.27822e-10	1.50354e-10
GOTERM_BP_FAT	GO:0007568~aging	17	15.8879	1.87942e-11	IL10, JUN, CALCA, TGFB1, PRKCD, MIF, MAPK14, SOD2, FGF2, RELA, ICAM1, SOD1, IL6, BCL2, CCL2, TP53, NFE2L2	105	280	16650	9.62755	9.15846e-08	2.27822e-10	1.50354e-10
GOTERM_BP_FAT	GO:0007167~enzyme linked receptor protein signaling pathway	28	26.1682	1.92576e-11	APP, SRC, PIK3CB, FGF2, HIF1A, RELA, EGFR, INS, SGPL1, CASP3, CCL2, FYN, PLCG1, XBP1, JUN, TGFB1, MMP2, PRKCD, PTPN11, MAPK14, MMP9, RHOA, PTK2, VEGFA, IL1B, GHRL, ITGA5, HSPA1A	105	954	16650	4.65409	9.38423e-08	2.32859e-10	1.53679e-10
GOTERM_BP_FAT	GO:1902593~single-organism nuclear import	17	15.8879	1.98287e-11	IL10, XBP1, JUN, TGFB1, PRKCD, IL18, PTGS2, MAPK14, TNF, RHOA, EGFR, IL6, IFNG, IL1B, TLR4, TLR3, TLR2	105	281	16650	9.59329	9.66252e-08	2.39172e-10	1.57845e-10
GOTERM_BP_FAT	GO:0003018~vascular process in circulatory system	14	13.0841	2.09663e-11	CRP, CALCA, TGFB1, NOS2, SRC, PTGS2, SOD2, EGFR, KNG1, INS, ICAM1, SOD1, VEGFA, F2RL1	105	160	16650	13.875	1.02168e-07	2.52268e-10	1.66488e-10
GOTERM_BP_FAT	GO:0009991~response to extracellular stimulus	20	18.6916	2.21868e-11	XBP1, JUN, TGFB1, SRC, PTGS2, SOD2, EGFR, RELA, ICAM1, SOD1, CXCL10, IL6, AIFM1, ALB, BCL2, CCL2, GHRL, GLUL, TP53, NFE2L2	105	435	16650	7.29064	1.08116e-07	2.66297e-10	1.75746e-10
GOTERM_BP_FAT	GO:0009892~negative regulation of metabolic process	45	42.0561	2.28542e-11	IFITM3, APP, CALCA, SRC, HMGB1, HIF1A, TNF, RELA, EGFR, PIK3CG, KNG1, HSPD1, AQP1, INS, PTPA, CCL5, CCL4, FYN, CD55, ELANE, IL10, XBP1, JUN, TGFB1, NOS2, PRKCD, ISG15, MIF, F2, MMP9, IL2, NFKB1, SOD1, VEGFA, IL6, IFNG, IL1B, BCL2, BAX, F2RL1, GHRL, EZR, TP53, TLR4, HSPA1A	105	2522	16650	2.82939	1.11369e-07	2.73633e-10	1.80588e-10
GOTERM_BP_FAT	GO:0002819~regulation of adaptive immune response	13	12.1495	2.39799e-11	IL10, TGFB1, RIPK3, IFNB1, HMGB1, AGER, TNF, IL2, HSPD1, IL6, IFNG, IL1B, B2M	105	128	16650	16.1049	1.16854e-07	2.86407e-10	1.89018e-10
GOTERM_BP_FAT	GO:0002449~lymphocyte mediated immunity	17	15.8879	2.45162e-11	IL10, TGFB1, RIPK3, IFNB1, PRKCD, HMGB1, AGER, TNF, IL2, HSPD1, ICAM1, IL6, IFNG, IL1B, B2M, CD55, MBL2	105	285	16650	9.45865	1.19467e-07	2.92096e-10	1.92773e-10
GOTERM_BP_FAT	GO:0002758~innate immune response-activating signal transduction	16	14.9533	2.83643e-11	SRC, PRKCD, HMGB1, RELA, NFKB1, HSPD1, CLEC4A, IRF3, CD209, F2RL1, FYN, TLR5, TLR4, TLR3, HSPA1A, TLR2	105	243	16650	10.4409	1.38219e-07	3.3712e-10	2.22487e-10
GOTERM_BP_FAT	GO:0032388~positive regulation of intracellular transport	17	15.8879	2.86827e-11	XBP1, TGFB1, PRKCD, IL18, PTGS2, MAPK14, TNF, RHOA, EGFR, IL6, IL1B, CCL2, EZR, TP53, TLR4, TLR3, TLR2	105	288	16650	9.36012	1.39771e-07	3.40075e-10	2.24437e-10
GOTERM_BP_FAT	GO:0051235~maintenance of location	17	15.8879	3.18143e-11	IL10, CRP, TGFB1, F2, FGF2, TNF, NFKB1, CXCL10, CXCL11, IL6, IL1B, CXCR3, ALB, BAX, PLCG1, EZR, CCR5	105	290	16650	9.29557	1.55031e-07	3.7629e-10	2.48337e-10
GOTERM_BP_FAT	GO:0051924~regulation of calcium ion transport	15	14.0187	3.31664e-11	CALCA, TGFB1, F2, PTGS2, PIK3CG, ICAM1, CXCL10, CXCL11, CCL5, CXCR3, CCL4, BCL2, BAX, CCL2, PLCG1	105	204	16650	11.6597	1.6162e-07	3.91331e-10	2.58264e-10
GOTERM_BP_FAT	GO:0050878~regulation of body fluid levels	21	19.6262	3.3522e-11	XBP1, IFNA1, IFNB1, SRC, PRKCD, PTPN11, AQP5, PIK3CB, F2, HIF1A, RHOA, PIK3CG, KNG1, AQP1, VEGFA, IL6, PLAU, F2RL1, FYN, TLR4, NFE2L2	105	503	16650	6.62028	1.63353e-07	3.94572e-10	2.60403e-10
GOTERM_BP_FAT	GO:0031324~negative regulation of cellular metabolic process	43	40.1869	3.64972e-11	IFITM3, APP, CALCA, SRC, HMGB1, HIF1A, TNF, RELA, EGFR, PIK3CG, KNG1, HSPD1, AQP1, INS, PTPA, CCL5, CCL4, FYN, CD55, ELANE, IL10, XBP1, JUN, TGFB1, PRKCD, ISG15, MIF, F2, MMP9, IL2, NFKB1, VEGFA, IL6, IFNG, IL1B, BCL2, BAX, F2RL1, GHRL, EZR, TP53, TLR4, HSPA1A	105	2345	16650	2.90771	1.77851e-07	4.28556e-10	2.82831e-10
GOTERM_BP_FAT	GO:0051051~negative regulation of transport	20	18.6916	3.97547e-11	IL10, CALCA, TGFB1, FN1, PTPN11, HMGB1, PTGS2, TNF, MMP9, NFKB1, INS, ICAM1, IL6, IL1B, BCL2, F2RL1, GHRL, CRYAA, EZR, HSPA1A	105	450	16650	7.04762	1.93724e-07	4.65684e-10	3.07334e-10
GOTERM_BP_FAT	GO:0002218~activation of innate immune response	16	14.9533	4.24459e-11	SRC, PRKCD, HMGB1, RELA, NFKB1, HSPD1, CLEC4A, IRF3, CD209, F2RL1, FYN, TLR5, TLR4, TLR3, HSPA1A, TLR2	105	250	16650	10.1486	2.06839e-07	4.96016e-10	3.27352e-10
GOTERM_BP_FAT	GO:0007259~JAK-STAT cascade	14	13.0841	4.86213e-11	IL10, CSF2, IFNA1, IFNB1, IL18, IL2, VEGFA, IL3, IL6, IL5, IFNG, CCL5, CCL2, FYN	105	171	16650	12.9825	2.36932e-07	5.66822e-10	3.74082e-10
GOTERM_BP_FAT	GO:0000302~response to reactive oxygen species	15	14.0187	4.89173e-11	JUN, SRC, PRKCD, SOD2, TNF, RELA, KLF2, HSPD1, AQP1, SOD1, IL6, AIFM1, CASP3, BCL2, NFE2L2	105	210	16650	11.3265	2.38374e-07	5.68912e-10	3.75461e-10
GOTERM_BP_FAT	GO:0051170~nuclear import	17	15.8879	5.02207e-11	IL10, XBP1, JUN, TGFB1, PRKCD, IL18, PTGS2, MAPK14, TNF, RHOA, EGFR, IL6, IFNG, IL1B, TLR4, TLR3, TLR2	105	299	16650	9.01577	2.44726e-07	5.8268e-10	3.84547e-10
GOTERM_BP_FAT	GO:0010634~positive regulation of epithelial cell migration	12	11.215	5.03501e-11	JUN, TGFB1, IFNG, SRC, PLCG1, MAPK14, PTGS2, HIF1A, FGF2, MMP9, NFE2L2, VEGFA	105	105	16650	18.1224	2.45356e-07	5.82794e-10	3.84622e-10
GOTERM_BP_FAT	GO:0045596~negative regulation of cell differentiation	23	21.4953	5.11971e-11	CRP, APP, XBP1, CALCA, TGFB1, IFNB1, IL18, HMGB1, ACTN4, F2, SOD2, TNF, RHOA, EGFR, PTK2, CXCL10, IL6, IFNG, BCL2, B2M, TLR4, TLR3, NFE2L2	105	640	16650	5.69866	2.49483e-07	5.91193e-10	3.90165e-10
GOTERM_BP_FAT	GO:0030162~regulation of proteolysis	24	22.4299	5.36069e-11	IL10, APP, XBP1, SRC, FN1, HMGB1, F2, TNF, MMP9, PTK2, KNG1, HSPD1, AQP1, INS, VEGFA, IL6, IFNG, AIFM1, IL1B, CASP3, BAX, CD55, HSPA1A, NFE2L2	105	708	16650	5.3753	2.61226e-07	6.17556e-10	4.07564e-10
GOTERM_BP_FAT	GO:0032846~positive regulation of homeostatic process	15	14.0187	5.55296e-11	TGFB1, ISG15, F2, PTGS2, MAPK14, HIF1A, TNF, EGFR, CXCL10, CXCL11, IL1B, CXCR3, BAX, GHRL, PLCG1	105	212	16650	11.2197	2.70596e-07	6.36696e-10	4.20196e-10
GOTERM_BP_FAT	GO:0002366~leukocyte activation involved in immune response	15	14.0187	5.55296e-11	XBP1, TGFB1, IFNA1, IFNB1, IL18, HMGB1, IL2, PIK3CG, HSPD1, ICAM1, IL6, IFNG, F2RL1, TLR4, TLR3	105	212	16650	11.2197	2.70596e-07	6.36696e-10	4.20196e-10
GOTERM_BP_FAT	GO:0046427~positive regulation of JAK-STAT cascade	11	10.2804	5.85696e-11	IL10, IL3, IL6, CSF2, IL5, IFNG, CCL5, IL18, FYN, IL2, VEGFA	105	79	16650	22.0796	2.8541e-07	6.68407e-10	4.41124e-10
GOTERM_BP_FAT	GO:1904894~positive regulation of STAT cascade	11	10.2804	5.85696e-11	IL10, IL3, IL6, CSF2, IL5, IFNG, CCL5, IL18, FYN, IL2, VEGFA	105	79	16650	22.0796	2.8541e-07	6.68407e-10	4.41124e-10
GOTERM_BP_FAT	GO:0090316~positive regulation of intracellular protein transport	16	14.9533	5.93701e-11	XBP1, TGFB1, PRKCD, IL18, PTGS2, MAPK14, TNF, RHOA, EGFR, IL6, IL1B, CCL2, TP53, TLR4, TLR3, TLR2	105	256	16650	9.91071	2.8931e-07	6.75959e-10	4.46108e-10
GOTERM_BP_FAT	GO:0051254~positive regulation of RNA metabolic process	33	30.8411	5.97435e-11	APP, SRC, HMGB1, FGF2, HIF1A, TNF, RELA, EGFR, CXCR3, IL10, XBP1, JUN, TGFB1, IFNB1, IL18, MAPK14, IL2, NFKB1, KLF2, VEGFA, IL1A, CXCL10, IL6, IL5, IFNG, IL1B, F2RL1, TP53, TLR4, TLR3, HSPA1A, NFE2L2, TLR2	105	1415	16650	3.69813	2.9113e-07	6.78625e-10	4.47867e-10
GOTERM_BP_FAT	GO:0007249~I-kappaB kinase/NF-kappaB signaling	16	14.9533	6.27311e-11	IL10, RIPK3, IL18, PTGS2, TNF, RHOA, RELA, NFKB1, IL1A, IRF3, IL1B, F2RL1, FYN, TLR4, TLR3, TLR2	105	257	16650	9.87215	3.05689e-07	7.10904e-10	4.6917e-10
GOTERM_BP_FAT	GO:0002263~cell activation involved in immune response	15	14.0187	6.2952e-11	XBP1, TGFB1, IFNA1, IFNB1, IL18, HMGB1, IL2, PIK3CG, HSPD1, ICAM1, IL6, IFNG, F2RL1, TLR4, TLR3	105	214	16650	11.1148	3.06765e-07	7.11752e-10	4.6973e-10
GOTERM_BP_FAT	GO:0097696~STAT cascade	14	13.0841	6.98792e-11	IL10, CSF2, IFNA1, IFNB1, IL18, IL2, VEGFA, IL3, IL6, IL5, IFNG, CCL5, CCL2, FYN	105	176	16650	12.6136	3.40521e-07	7.88244e-10	5.20212e-10
GOTERM_BP_FAT	GO:0006801~superoxide metabolic process	10	9.34579	7.13828e-11	CRP, TGFB1, NOS2, PRKCD, F2RL1, SOD2, TNF, EGFR, SOD1, NFE2L2	105	57	16650	27.8195	3.47848e-07	8.03345e-10	5.30178e-10
GOTERM_BP_FAT	GO:0034612~response to tumor necrosis factor	16	14.9533	8.68582e-11	CALCA, CXCL8, PTGS2, TNF, RELA, KLF2, ICAM1, IL6, CASP3, CCL5, CCL4, F2RL1, CCL2, CAMP, HSPA1A, NFE2L2	105	263	16650	9.64693	4.2326e-07	9.75253e-10	6.43631e-10
GOTERM_BP_FAT	GO:1903508~positive regulation of nucleic acid-templated transcription	32	29.9065	8.7929e-11	APP, SRC, HMGB1, FGF2, HIF1A, TNF, RELA, EGFR, CXCR3, IL10, XBP1, JUN, TGFB1, IFNB1, IL18, MAPK14, IL2, NFKB1, KLF2, VEGFA, IL1A, CXCL10, IL6, IL5, IFNG, IL1B, F2RL1, TP53, TLR4, TLR3, NFE2L2, TLR2	105	1349	16650	3.76152	4.28478e-07	9.82748e-10	6.48577e-10
GOTERM_BP_FAT	GO:0045893~positive regulation of transcription, DNA-templated	32	29.9065	8.7929e-11	APP, SRC, HMGB1, FGF2, HIF1A, TNF, RELA, EGFR, CXCR3, IL10, XBP1, JUN, TGFB1, IFNB1, IL18, MAPK14, IL2, NFKB1, KLF2, VEGFA, IL1A, CXCL10, IL6, IL5, IFNG, IL1B, F2RL1, TP53, TLR4, TLR3, NFE2L2, TLR2	105	1349	16650	3.76152	4.28478e-07	9.82748e-10	6.48577e-10
GOTERM_BP_FAT	GO:0051384~response to glucocorticoid	13	12.1495	8.88876e-11	IL10, TGFB1, IFNB1, HMGB1, PTGS2, TNF, EGFR, HSPD1, AQP1, IL6, CASP3, BCL2, CCL2	105	143	16650	14.4156	4.33149e-07	9.91188e-10	6.54148e-10
GOTERM_BP_FAT	GO:1902580~single-organism cellular localization	29	27.1028	9.34885e-11	APP, PTGS2, HIF1A, TNF, AGER, EGFR, PIK3CG, CCL2, IL10, XBP1, JUN, TGFB1, PRKCD, IL18, ACTN4, MAPK14, RHOA, SOD1, IL6, IFNG, IL1B, ALB, BCL2, BAX, EZR, TP53, TLR4, TLR3, TLR2	105	1102	16650	4.17293	4.5557e-07	1.04011e-09	6.86436e-10
GOTERM_BP_FAT	GO:0090322~regulation of superoxide metabolic process	8	7.47664	9.58891e-11	CRP, TGFB1, PRKCD, F2RL1, TNF, EGFR, SOD1, NFE2L2	105	24	16650	52.8571	4.67267e-07	1.06439e-09	7.02458e-10
GOTERM_BP_FAT	GO:0002718~regulation of cytokine production involved in immune response	10	9.34579	9.86809e-11	IL10, IL6, TGFB1, IFNB1, F2RL1, MIF, TNF, B2M, TLR4, TLR3	105	59	16650	26.8765	4.80872e-07	1.09289e-09	7.21267e-10
GOTERM_BP_FAT	GO:0070838~divalent metal ion transport	19	17.757	1.00061e-10	CALCA, TGFB1, F2, PTGS2, FGF2, PIK3CG, ICAM1, CXCL10, CXCL11, CCL5, CXCR3, CCL4, BCL2, BAX, CCL2, FYN, PLCG1, CCR5, B2M	105	418	16650	7.20779	4.87597e-07	1.10566e-09	7.29696e-10
GOTERM_BP_FAT	GO:0022008~neurogenesis	33	30.8411	1.06478e-10	APP, HMGB1, FGF2, HIF1A, AGER, RELA, EGFR, AIFM1, CASP3, CCL2, FYN, B2M, XBP1, JUN, TGFB1, FN1, PTPN11, F2, SOD2, RHOA, IL2, PTK2, SOD1, VEGFA, IL6, IFNG, BCL2, BAX, GHRL, EZR, TLR4, NFE2L2, TLR2	105	1447	16650	3.61635	5.18868e-07	1.17391e-09	7.74737e-10
GOTERM_BP_FAT	GO:0051897~positive regulation of protein kinase B signaling	11	10.2804	1.09392e-10	IL6, XBP1, TGFB1, SRC, IL18, TNF, FGF2, PTK2, EGFR, PIK3CG, INS	105	84	16650	20.7653	5.33068e-07	1.20331e-09	7.94142e-10
GOTERM_BP_FAT	GO:0072511~divalent inorganic cation transport	19	17.757	1.12416e-10	CALCA, TGFB1, F2, PTGS2, FGF2, PIK3CG, ICAM1, CXCL10, CXCL11, CCL5, CXCR3, CCL4, BCL2, BAX, CCL2, FYN, PLCG1, CCR5, B2M	105	421	16650	7.15643	5.47802e-07	1.23379e-09	8.14255e-10
GOTERM_BP_FAT	GO:0006816~calcium ion transport	18	16.8224	1.23557e-10	CALCA, TGFB1, F2, PTGS2, FGF2, PIK3CG, ICAM1, CXCL10, CXCL11, CCL5, CXCR3, CCL4, BCL2, BAX, CCL2, FYN, PLCG1, CCR5	105	369	16650	7.73519	6.02091e-07	1.35301e-09	8.9294e-10
GOTERM_BP_FAT	GO:1902680~positive regulation of RNA biosynthetic process	32	29.9065	1.27247e-10	APP, SRC, HMGB1, FGF2, HIF1A, TNF, RELA, EGFR, CXCR3, IL10, XBP1, JUN, TGFB1, IFNB1, IL18, MAPK14, IL2, NFKB1, KLF2, VEGFA, IL1A, CXCL10, IL6, IL5, IFNG, IL1B, F2RL1, TP53, TLR4, TLR3, NFE2L2, TLR2	105	1369	16650	3.70656	6.20072e-07	1.3903e-09	9.17545e-10
GOTERM_BP_FAT	GO:0042100~B cell proliferation	11	10.2804	1.38852e-10	IL10, IL5, IFNA1, IFNB1, PRKCD, BCL2, BAX, MIF, TLR4, IL2, HSPD1	105	86	16650	20.2824	6.76627e-07	1.51371e-09	9.98991e-10
GOTERM_BP_FAT	GO:0046425~regulation of JAK-STAT cascade	13	12.1495	1.43943e-10	IL10, CSF2, IFNA1, IFNB1, IL18, IL2, VEGFA, IL3, IL6, IL5, IFNG, CCL5, FYN	105	149	16650	13.8351	7.01433e-07	1.55874e-09	1.02871e-09
GOTERM_BP_FAT	GO:1904892~regulation of STAT cascade	13	12.1495	1.43943e-10	IL10, CSF2, IFNA1, IFNB1, IL18, IL2, VEGFA, IL3, IL6, IL5, IFNG, CCL5, FYN	105	149	16650	13.8351	7.01433e-07	1.55874e-09	1.02871e-09
GOTERM_BP_FAT	GO:0002285~lymphocyte activation involved in immune response	13	12.1495	1.43943e-10	XBP1, TGFB1, IFNA1, IFNB1, IL18, HMGB1, IL2, HSPD1, ICAM1, IL6, IFNG, F2RL1, TLR4	105	149	16650	13.8351	7.01433e-07	1.55874e-09	1.02871e-09
GOTERM_BP_FAT	GO:0033157~regulation of intracellular protein transport	18	16.8224	1.46053e-10	IL10, XBP1, TGFB1, PRKCD, IL18, PTPN11, PTGS2, MAPK14, TNF, RHOA, EGFR, IL6, IL1B, CCL2, TP53, TLR4, TLR3, TLR2	105	373	16650	7.65224	7.11717e-07	1.57809e-09	1.04148e-09
GOTERM_BP_FAT	GO:0010959~regulation of metal ion transport	17	15.8879	1.50764e-10	CALCA, TGFB1, ACTN4, F2, PTGS2, PIK3CG, ICAM1, CXCL10, CXCL11, CCL5, CXCR3, CCL4, BCL2, BAX, CCL2, PLCG1, B2M	105	322	16650	8.37178	7.34675e-07	1.62539e-09	1.0727e-09
GOTERM_BP_FAT	GO:0042346~positive regulation of NF-kappaB import into nucleus	8	7.47664	1.80392e-10	IL1B, IL18, PTGS2, TNF, TLR4, RHOA, TLR3, TLR2	105	26	16650	48.7912	8.79051e-07	1.94051e-09	1.28066e-09
GOTERM_BP_FAT	GO:0033365~protein localization to organelle	26	24.2991	1.966e-10	SRC, PTGS2, TNF, EGFR, INS, FYN, IL10, XBP1, JUN, TGFB1, PRKCD, IL18, MAPK14, F2, RHOA, VEGFA, IL6, IFNG, IL1B, BCL2, BAX, EZR, TP53, TLR4, TLR3, TLR2	105	902	16650	4.5708	9.58033e-07	2.11021e-09	1.39266e-09
GOTERM_BP_FAT	GO:0048545~response to steroid hormone	18	16.8224	2.02841e-10	IL10, TGFB1, IFNB1, SRC, DEFA1, HMGB1, PTGS2, TNF, EGFR, RELA, HSPD1, AQP1, IL6, AIFM1, CASP3, BCL2, CCL2, TLR2	105	381	16650	7.49156	9.88442e-07	2.1724e-09	1.4337e-09
GOTERM_BP_FAT	GO:0017038~protein import	17	15.8879	2.06987e-10	IL10, XBP1, JUN, TGFB1, PRKCD, IL18, PTGS2, MAPK14, TNF, RHOA, EGFR, IL6, IFNG, IL1B, TLR4, TLR3, TLR2	105	329	16650	8.19366	1.00865e-06	2.21195e-09	1.4598e-09
GOTERM_BP_FAT	GO:0042348~NF-kappaB import into nucleus	9	8.41121	2.13358e-10	IL10, IL1B, IL18, PTGS2, TNF, TLR4, RHOA, TLR3, TLR2	105	43	16650	33.1894	1.03969e-06	2.27504e-09	1.50144e-09
GOTERM_BP_FAT	GO:0042033~chemokine biosynthetic process	7	6.54206	2.45451e-10	IL6, IFNG, IL1B, IL18, TNF, ELANE, TLR3	105	15	16650	74	1.19608e-06	2.61154e-09	1.72352e-09
GOTERM_BP_FAT	GO:1902582~single-organism intracellular transport	23	21.4953	2.47258e-10	IL10, APP, XBP1, JUN, TGFB1, PRKCD, IL18, ACTN4, PTGS2, MAPK14, HIF1A, TNF, RHOA, EGFR, PIK3CG, SOD1, IL6, IFNG, IL1B, CCL2, TLR4, TLR3, TLR2	105	695	16650	5.24769	1.20489e-06	2.62503e-09	1.73242e-09
GOTERM_BP_FAT	GO:0043901~negative regulation of multi-organism process	13	12.1495	2.64994e-10	IL10, IFITM3, JUN, IFNB1, ISG15, TNF, IFNG, IL2RA, CCL5, CCL4, ELANE, CAMP, MBL2	105	157	16650	13.1301	1.29131e-06	2.8072e-09	1.85265e-09
GOTERM_BP_FAT	GO:1901652~response to peptide	19	17.757	2.66154e-10	IL10, XBP1, TGFB1, SRC, PRKCD, PTPN11, MAPK14, RELA, PTK2, NFKB1, KLF2, INS, IL6, IL1B, CCL2, FYN, GHRL, CD55, TLR2	105	444	16650	6.78571	1.29697e-06	2.81338e-09	1.85673e-09
GOTERM_BP_FAT	GO:0051817~modification of morphology or physiology of other organism involved in symbiotic interaction	11	10.2804	3.05601e-10	JUN, TGFB1, CD209, CCL5, ALB, CCL4, F2RL1, CAMP, ELANE, AQP1, MBL2	105	93	16650	18.7558	1.48919e-06	3.22336e-09	2.1273e-09
GOTERM_BP_FAT	GO:0097529~myeloid leukocyte migration	13	12.1495	3.07015e-10	CALCA, CXCL8, HMGB1, PIK3CG, VEGFA, IL1A, CXCL10, IL6, IFNG, IL1B, CCL5, CCL4, CCL2	105	159	16650	12.965	1.49608e-06	3.23128e-09	2.13253e-09
GOTERM_BP_FAT	GO:0009894~regulation of catabolic process	20	18.6916	3.22383e-10	IL10, XBP1, NOS2, PRKCD, HMGB1, HIF1A, TNF, EGFR, PIK3CG, RELA, PTK2, INS, IFNG, AIFM1, IL1B, BAX, FYN, EZR, HSPA1A, NFE2L2	105	509	16650	6.2307	1.57097e-06	3.38571e-09	2.23445e-09
GOTERM_BP_FAT	GO:0034341~response to interferon-gamma	13	12.1495	3.54974e-10	IFITM3, NOS2, IFNGR1, PRKCD, ICAM1, IFNG, IRF3, CCL5, MRC1, CCL4, CCL2, B2M, TLR3	105	161	16650	12.8039	1.72979e-06	3.71998e-09	2.45505e-09
GOTERM_BP_FAT	GO:0045834~positive regulation of lipid metabolic process	12	11.215	3.68522e-10	XBP1, TGFB1, IFNG, SRC, IL1B, PRKCD, F2, PTGS2, TNF, FGF2, PTK2, INS	105	126	16650	15.102	1.7958e-06	3.85366e-09	2.54328e-09
GOTERM_BP_FAT	GO:0042345~regulation of NF-kappaB import into nucleus	9	8.41121	3.7805e-10	IL10, IL1B, IL18, PTGS2, TNF, TLR4, RHOA, TLR3, TLR2	105	46	16650	31.0248	1.84223e-06	3.94483e-09	2.60344e-09
GOTERM_BP_FAT	GO:0050755~chemokine metabolic process	7	6.54206	3.90741e-10	IL6, IFNG, IL1B, IL18, TNF, ELANE, TLR3	105	16	16650	69.375	1.90408e-06	4.06855e-09	2.68509e-09
GOTERM_BP_FAT	GO:0042113~B cell activation	15	14.0187	3.98549e-10	IL10, XBP1, TGFB1, IFNA1, IFNB1, PRKCD, MIF, IL2, HSPD1, IL6, IL5, IFNG, BCL2, BAX, TLR4	105	246	16650	9.66899	1.94213e-06	4.141e-09	2.73291e-09
GOTERM_BP_FAT	GO:0080135~regulation of cellular response to stress	21	19.6262	4.29342e-10	XBP1, PRKCD, HMGB1, MIF, SOD2, AGER, HIF1A, TNF, EGFR, INS, SOD1, VEGFA, IL1A, IL1B, BAX, F2RL1, EZR, TLR4, TLR3, HSPA1A, NFE2L2	105	581	16650	5.7315	2.09218e-06	4.45145e-09	2.93779e-09
GOTERM_BP_FAT	GO:0032649~regulation of interferon-gamma production	11	10.2804	4.65995e-10	IL10, RIPK3, IL1B, IL18, ISG15, HMGB1, TNF, TLR4, IL2, TLR3, HSPD1	105	97	16650	17.9823	2.27079e-06	4.82122e-09	3.18183e-09
GOTERM_BP_FAT	GO:1903533~regulation of protein targeting	16	14.9533	5.45613e-10	IL10, XBP1, TGFB1, PRKCD, IL18, PTGS2, MAPK14, TNF, RHOA, EGFR, IL6, IL1B, CCL2, TLR4, TLR3, TLR2	105	300	16650	8.45714	2.65877e-06	5.62342e-09	3.71125e-09
GOTERM_BP_FAT	GO:0044364~disruption of cells of other organism	8	7.47664	5.46994e-10	IFNG, NOS2, ALB, F2RL1, DEFA1, CAMP, ELANE, MBL2	105	30	16650	42.2857	2.6655e-06	5.62342e-09	3.71125e-09
GOTERM_BP_FAT	GO:0031640~killing of cells of other organism	8	7.47664	5.46994e-10	IFNG, NOS2, ALB, F2RL1, DEFA1, CAMP, ELANE, MBL2	105	30	16650	42.2857	2.6655e-06	5.62342e-09	3.71125e-09
GOTERM_BP_FAT	GO:0002702~positive regulation of production of molecular mediator of immune response	10	9.34579	5.49799e-10	IL6, XBP1, TGFB1, IL5, IFNG, F2RL1, MIF, B2M, TLR4, IL2	105	71	16650	22.334	2.67917e-06	5.64036e-09	3.72243e-09
GOTERM_BP_FAT	GO:0006913~nucleocytoplasmic transport	19	17.757	5.59392e-10	IL10, XBP1, JUN, TGFB1, PRKCD, IL18, PTPN11, PTGS2, MAPK14, TNF, RHOA, EGFR, IL6, IFNG, IL1B, TP53, TLR4, TLR3, TLR2	105	465	16650	6.47926	2.72591e-06	5.72672e-09	3.77942e-09
GOTERM_BP_FAT	GO:0070227~lymphocyte apoptotic process	10	9.34579	6.25113e-10	IL10, RIPK3, CCL5, IL2RA, BAX, MIF, HIF1A, TP53, IL2, ICAM1	105	72	16650	22.0238	3.04617e-06	6.38611e-09	4.2146e-09
GOTERM_BP_FAT	GO:1901214~regulation of neuron death	15	14.0187	7.06677e-10	JUN, SIGMAR1, SOD2, HIF1A, HSPD1, SOD1, IL6, AIFM1, CASP3, CCL5, BCL2, BAX, CCL2, FYN, TP53	105	257	16650	9.25514	3.44363e-06	7.20426e-09	4.75455e-09
GOTERM_BP_FAT	GO:0051169~nuclear transport	19	17.757	7.34777e-10	IL10, XBP1, JUN, TGFB1, PRKCD, IL18, PTPN11, PTGS2, MAPK14, TNF, RHOA, EGFR, IL6, IFNG, IL1B, TP53, TLR4, TLR3, TLR2	105	473	16650	6.36968	3.58056e-06	7.47509e-09	4.93328e-09
GOTERM_BP_FAT	GO:0042993~positive regulation of transcription factor import into nucleus	9	8.41121	7.62026e-10	XBP1, IL1B, IL18, PTGS2, TNF, TLR4, RHOA, TLR3, TLR2	105	50	16650	28.5429	3.71335e-06	7.73615e-09	5.10557e-09
GOTERM_BP_FAT	GO:0071346~cellular response to interferon-gamma	12	11.215	7.74996e-10	IFNG, NOS2, IRF3, IFNGR1, CCL5, MRC1, PRKCD, CCL4, CCL2, B2M, TLR3, ICAM1	105	135	16650	14.0952	3.77655e-06	7.85147e-09	5.18168e-09
GOTERM_BP_FAT	GO:0009314~response to radiation	18	16.8224	8.40886e-10	APP, JUN, TGFB1, PTGS2, MAPK14, SOD2, HIF1A, EGFR, RELA, AQP1, ICAM1, CXCL10, CASP3, BCL2, BAX, CCL2, TP53, ELANE	105	418	16650	6.82843	4.09763e-06	8.48373e-09	5.59895e-09
GOTERM_BP_FAT	GO:0048608~reproductive structure development	18	16.8224	8.40886e-10	IL10, CSF2, SRC, PTPN11, PTGS2, MAPK14, HIF1A, EGFR, PTK2, ICAM1, SOD1, VEGFA, SGPL1, BCL2, BAX, GHRL, TLR5, TLR3	105	418	16650	6.82843	4.09763e-06	8.48373e-09	5.59895e-09
GOTERM_BP_FAT	GO:0030098~lymphocyte differentiation	16	14.9533	8.58016e-10	IL10, XBP1, TGFB1, IFNA1, RIPK3, IFNB1, IL18, HMGB1, IL2, SOD1, IL6, IFNG, IL2RA, BCL2, BAX, B2M	105	310	16650	8.18433	4.1811e-06	8.63866e-09	5.7012e-09
GOTERM_BP_FAT	GO:0038034~signal transduction in absence of ligand	10	9.34579	9.08292e-10	IL1A, CSF2, IL1B, CASP3, BCL2, BAX, FYN, TNF, IL2, HSPA1A	105	75	16650	21.1429	4.4261e-06	9.10722e-09	6.01043e-09
GOTERM_BP_FAT	GO:0097192~extrinsic apoptotic signaling pathway in absence of ligand	10	9.34579	9.08292e-10	IL1A, CSF2, IL1B, CASP3, BCL2, BAX, FYN, TNF, IL2, HSPA1A	105	75	16650	21.1429	4.4261e-06	9.10722e-09	6.01043e-09
GOTERM_BP_FAT	GO:0048732~gland development	18	16.8224	9.37592e-10	IL10, XBP1, JUN, TGFB1, RIPK3, SRC, SOD2, FGF2, HIF1A, TNF, EGFR, RELA, SOD1, VEGFA, IL6, BCL2, BAX, EZR	105	421	16650	6.77978	4.56887e-06	9.38169e-09	6.19157e-09
GOTERM_BP_FAT	GO:0061458~reproductive system development	18	16.8224	1.00766e-09	IL10, CSF2, SRC, PTPN11, PTGS2, MAPK14, HIF1A, EGFR, PTK2, ICAM1, SOD1, VEGFA, SGPL1, BCL2, BAX, GHRL, TLR5, TLR3	105	423	16650	6.74772	4.91031e-06	1.00621e-08	6.64064e-09
GOTERM_BP_FAT	GO:0001776~leukocyte homeostasis	10	9.34579	1.02501e-09	IL6, TGFB1, IFNG, RIPK3, IL2RA, BCL2, BAX, HMGB1, MIF, HIF1A	105	76	16650	20.8647	4.99485e-06	1.02144e-08	6.74115e-09
GOTERM_BP_FAT	GO:0043535~regulation of blood vessel endothelial cell migration	9	8.41121	1.0572e-09	TGFB1, PLCG1, HMGB1, MAPK14, PTGS2, FGF2, RHOA, NFE2L2, VEGFA	105	52	16650	27.4451	5.15175e-06	1.05138e-08	6.93872e-09
GOTERM_BP_FAT	GO:0032930~positive regulation of superoxide anion generation	6	5.60748	1.06591e-09	CRP, TGFB1, PRKCD, F2RL1, EGFR, SOD1	105	9	16650	105.714	5.19418e-06	1.05788e-08	6.98162e-09
GOTERM_BP_FAT	GO:0051052~regulation of DNA metabolic process	17	15.8879	1.14848e-09	IL10, JUN, TGFB1, CXCL8, CSF2, SRC, PRKCD, HMGB1, EGFR, IL2, INS, IL3, IL6, IFNG, AIFM1, BAX, TP53	105	370	16650	7.28571	5.59653e-06	1.13751e-08	7.50714e-09
GOTERM_BP_FAT	GO:0043269~regulation of ion transport	20	18.6916	1.3252e-09	CALCA, TGFB1, ACTN4, MIF, F2, PTGS2, MMP9, PIK3CG, ICAM1, CXCL10, CXCL11, IL1B, CCL5, CXCR3, CCL4, BCL2, BAX, CCL2, PLCG1, B2M	105	554	16650	5.7246	6.45769e-06	1.30988e-08	8.64472e-09
GOTERM_BP_FAT	GO:0001959~regulation of cytokine-mediated signaling pathway	12	11.215	1.43504e-09	IL6, IFNG, IRF3, IFNA1, IFNB1, IFNGR1, CCL5, F2RL1, PTPN11, HIF1A, TNF, HSPA1A	105	143	16650	13.3067	6.99295e-06	1.41558e-08	9.34231e-09
GOTERM_BP_FAT	GO:0002456~T cell mediated immunity	10	9.34579	1.45805e-09	IL6, RIPK3, IFNB1, IL1B, HMGB1, AGER, B2M, CD55, HSPD1, ICAM1	105	79	16650	20.0723	7.10504e-06	1.43261e-08	9.45469e-09
GOTERM_BP_FAT	GO:0043123~positive regulation of I-kappaB kinase/NF-kappaB signaling	13	12.1495	1.45819e-09	IL18, PTGS2, TNF, RHOA, RELA, IL1A, IRF3, IL1B, F2RL1, FYN, TLR4, TLR3, TLR2	105	182	16650	11.3265	7.10571e-06	1.43261e-08	9.45469e-09
GOTERM_BP_FAT	GO:0048771~tissue remodeling	12	11.215	1.54575e-09	IL1A, IL6, CALCA, TGFB1, SRC, IL18, BAX, HMGB1, AGER, HIF1A, EGFR, IL2	105	144	16650	13.2143	7.53243e-06	1.51558e-08	1.00023e-08
GOTERM_BP_FAT	GO:0045639~positive regulation of myeloid cell differentiation	10	9.34579	1.82929e-09	IL3, CALCA, JUN, IL5, IFNG, ISG15, HMGB1, MAPK14, HIF1A, TNF	105	81	16650	19.5767	8.91407e-06	1.78998e-08	1.18132e-08
GOTERM_BP_FAT	GO:0010605~negative regulation of macromolecule metabolic process	40	37.3832	1.85592e-09	IFITM3, APP, CALCA, SRC, HMGB1, TNF, RELA, EGFR, KNG1, AQP1, INS, PTPA, CCL5, CCL4, FYN, CD55, ELANE, IL10, XBP1, JUN, TGFB1, NOS2, PRKCD, ISG15, MIF, F2, MMP9, IL2, NFKB1, VEGFA, IL6, IFNG, IL1B, BAX, F2RL1, GHRL, EZR, TP53, TLR4, HSPA1A	105	2326	16650	2.72694	9.04385e-06	1.8124e-08	1.19612e-08
GOTERM_BP_FAT	GO:0070997~neuron death	15	14.0187	1.87087e-09	APP, JUN, SIGMAR1, SOD2, HIF1A, HSPD1, SOD1, IL6, AIFM1, CASP3, BCL2, BAX, CCL2, FYN, TP53	105	277	16650	8.5869	9.11672e-06	1.81971e-08	1.20094e-08
GOTERM_BP_FAT	GO:0006909~phagocytosis	15	14.0187	1.87087e-09	CRP, TGFB1, SRC, PRKCD, HMGB1, PIK3CB, TNF, PTK2, IL1B, F2RL1, CCL2, FYN, PLCG1, ELANE, MBL2	105	277	16650	8.5869	9.11672e-06	1.81971e-08	1.20094e-08
GOTERM_BP_FAT	GO:1903034~regulation of response to wounding	12	11.215	1.92528e-09	IL10, XBP1, PLAU, PRKCD, F2RL1, HMGB1, F2, AGER, FGF2, TLR4, KNG1, NFE2L2	105	147	16650	12.9446	9.38182e-06	1.8689e-08	1.2334e-08
GOTERM_BP_FAT	GO:0042311~vasodilation	9	8.41121	1.95499e-09	CRP, CALCA, NOS2, F2RL1, SOD2, KNG1, EGFR, SOD1, INS	105	56	16650	25.4847	9.52662e-06	1.89397e-08	1.24995e-08
GOTERM_BP_FAT	GO:0001101~response to acid chemical	15	14.0187	1.96005e-09	XBP1, SRC, MMP2, PTGS2, SOD2, TNF, EGFR, RELA, AQP1, INS, ICAM1, IL6, CASP3, CCL2, TLR2	105	278	16650	8.55601	9.5513e-06	1.89511e-08	1.2507e-08
GOTERM_BP_FAT	GO:0002690~positive regulation of leukocyte chemotaxis	10	9.34579	2.04426e-09	CXCL10, IL6, CXCL11, CXCL8, CCL5, CCL4, F2RL1, CCL2, HMGB1, VEGFA	105	82	16650	19.338	9.96161e-06	1.97261e-08	1.30185e-08
GOTERM_BP_FAT	GO:0003006~developmental process involved in reproduction	21	19.6262	2.05443e-09	IL10, TGFB1, CSF2, SRC, PTPN11, PTGS2, MAPK14, HIF1A, EGFR, PTK2, ICAM1, SOD1, VEGFA, IL1A, SGPL1, IL1B, BCL2, BAX, GHRL, TLR5, TLR3	105	636	16650	5.23585	1.00112e-05	1.97851e-08	1.30574e-08
GOTERM_BP_FAT	GO:0060759~regulation of response to cytokine stimulus	12	11.215	2.22264e-09	IL6, IFNG, IRF3, IFNA1, IFNB1, IFNGR1, CCL5, F2RL1, PTPN11, HIF1A, TNF, HSPA1A	105	149	16650	12.7709	1.08309e-05	2.13628e-08	1.40986e-08
GOTERM_BP_FAT	GO:0002683~negative regulation of immune system process	17	15.8879	2.27702e-09	IL10, CALCA, TGFB1, IFNB1, HMGB1, MIF, TNF, IL2, INS, IL2RA, F2RL1, CCL2, EZR, TLR4, CD55, TLR3, NFE2L2	105	388	16650	6.94772	1.10958e-05	2.18423e-08	1.44151e-08
GOTERM_BP_FAT	GO:0048699~generation of neurons	30	28.0374	2.30109e-09	APP, HMGB1, HIF1A, AGER, RELA, EGFR, AIFM1, CASP3, FYN, B2M, XBP1, JUN, TGFB1, FN1, PTPN11, F2, SOD2, RHOA, IL2, PTK2, SOD1, VEGFA, IL6, IFNG, BCL2, BAX, GHRL, EZR, NFE2L2, TLR2	105	1357	16650	3.50563	1.12131e-05	2.20299e-08	1.45389e-08
GOTERM_BP_FAT	GO:0001935~endothelial cell proliferation	11	10.2804	2.31023e-09	XBP1, CALCA, JUN, CXCR3, CCL2, GHRL, HMGB1, PIK3CB, HIF1A, FGF2, VEGFA	105	114	16650	15.3008	1.12577e-05	2.2074e-08	1.45681e-08
GOTERM_BP_FAT	GO:0070228~regulation of lymphocyte apoptotic process	9	8.41121	2.61107e-09	IL10, RIPK3, CCL5, BAX, MIF, HIF1A, TP53, IL2, ICAM1	105	58	16650	24.6059	1.27237e-05	2.48511e-08	1.64008e-08
GOTERM_BP_FAT	GO:0050829~defense response to Gram-negative bacterium	9	8.41121	2.61107e-09	APP, IL6, CALCA, NOS2, F2RL1, TLR5, B2M, TLR4, CAMP	105	58	16650	24.6059	1.27237e-05	2.48511e-08	1.64008e-08
GOTERM_BP_FAT	GO:0014074~response to purine-containing compound	12	11.215	2.74606e-09	APP, IL6, JUN, IL1B, CCL2, EZR, PTGS2, RELA, PIK3CG, HSPD1, AQP1, SOD1	105	152	16650	12.5188	1.33815e-05	2.60849e-08	1.72151e-08
GOTERM_BP_FAT	GO:0043523~regulation of neuron apoptotic process	13	12.1495	2.84747e-09	JUN, SIGMAR1, SOD2, HIF1A, HSPD1, SOD1, AIFM1, CASP3, BCL2, BAX, CCL2, FYN, TP53	105	193	16650	10.681	1.38756e-05	2.69956e-08	1.78161e-08
GOTERM_BP_FAT	GO:0043122~regulation of I-kappaB kinase/NF-kappaB signaling	14	13.0841	2.90158e-09	IL10, IL18, PTGS2, TNF, RHOA, RELA, IL1A, IRF3, IL1B, F2RL1, FYN, TLR4, TLR3, TLR2	105	238	16650	9.32773	1.41393e-05	2.74552e-08	1.81194e-08
GOTERM_BP_FAT	GO:0019216~regulation of lipid metabolic process	15	14.0187	2.95555e-09	XBP1, TGFB1, SRC, PRKCD, F2, PTGS2, FGF2, TNF, PIK3CG, PTK2, NFKB1, INS, SOD1, IFNG, IL1B	105	287	16650	8.28771	1.44023e-05	2.79116e-08	1.84207e-08
GOTERM_BP_FAT	GO:0007596~blood coagulation	16	14.9533	3.28856e-09	IFNA1, IFNB1, SRC, PRKCD, PTPN11, PIK3CB, F2, RHOA, PIK3CG, KNG1, IL6, PLAU, F2RL1, FYN, TLR4, NFE2L2	105	342	16650	7.41855	1.6025e-05	3.09965e-08	2.04565e-08
GOTERM_BP_FAT	GO:0048144~fibroblast proliferation	10	9.34579	3.48699e-09	JUN, TGFB1, IFNG, FN1, BAX, MIF, SOD2, TP53, EGFR, AQP1	105	87	16650	18.2266	1.6992e-05	3.28033e-08	2.1649e-08
GOTERM_BP_FAT	GO:0050830~defense response to Gram-positive bacterium	10	9.34579	3.86429e-09	CRP, APP, IL6, CALCA, DEFA1, TNF, B2M, CAMP, MBL2, TLR2	105	88	16650	18.0195	1.88305e-05	3.62129e-08	2.38991e-08
GOTERM_BP_FAT	GO:0048145~regulation of fibroblast proliferation	10	9.34579	3.86429e-09	JUN, TGFB1, IFNG, FN1, BAX, MIF, SOD2, TP53, EGFR, AQP1	105	88	16650	18.0195	1.88305e-05	3.62129e-08	2.38991e-08
GOTERM_BP_FAT	GO:0071356~cellular response to tumor necrosis factor	14	13.0841	3.92171e-09	CALCA, CXCL8, TNF, RELA, KLF2, ICAM1, IL6, CCL5, CCL4, F2RL1, CCL2, CAMP, HSPA1A, NFE2L2	105	244	16650	9.09836	1.91103e-05	3.66804e-08	2.42077e-08
GOTERM_BP_FAT	GO:0031341~regulation of cell killing	9	8.41121	3.9501e-09	IL10, IFNG, RIPK3, NOS2, F2RL1, CCL2, AGER, B2M, ICAM1	105	61	16650	23.3958	1.92487e-05	3.67345e-08	2.42434e-08
GOTERM_BP_FAT	GO:0042108~positive regulation of cytokine biosynthetic process	9	8.41121	3.9501e-09	IL1A, IFNG, IL1B, IL9, TNF, TLR4, RELA, ELANE, TLR3	105	61	16650	23.3958	1.92487e-05	3.67345e-08	2.42434e-08
GOTERM_BP_FAT	GO:0042531~positive regulation of tyrosine phosphorylation of STAT protein	9	8.41121	3.9501e-09	IL3, IL6, CSF2, IFNG, CCL5, IL18, FYN, IL2, VEGFA	105	61	16650	23.3958	1.92487e-05	3.67345e-08	2.42434e-08
GOTERM_BP_FAT	GO:2000021~regulation of ion homeostasis	13	12.1495	4.02976e-09	CALCA, TGFB1, SRC, F2, FGF2, CXCL10, CXCL11, CXCR3, BCL2, BAX, PLCG1, CCR5, B2M	105	199	16650	10.3589	1.96368e-05	3.74038e-08	2.46851e-08
GOTERM_BP_FAT	GO:0043434~response to peptide hormone	17	15.8879	4.20482e-09	IL10, XBP1, TGFB1, SRC, PRKCD, PTPN11, RELA, PTK2, NFKB1, INS, IL6, IL1B, CCL2, FYN, GHRL, CD55, TLR2	105	405	16650	6.65608	2.04899e-05	3.89545e-08	2.57085e-08
GOTERM_BP_FAT	GO:0006959~humoral immune response	14	13.0841	4.77194e-09	APP, CALCA, IFNA1, IFNB1, DEFA1, TNF, IL6, IFNG, BCL2, CCL2, B2M, CD55, CAMP, MBL2	105	248	16650	8.95161	2.32534e-05	4.40504e-08	2.90716e-08
GOTERM_BP_FAT	GO:0051054~positive regulation of DNA metabolic process	13	12.1495	4.77295e-09	JUN, TGFB1, CSF2, SRC, PRKCD, HMGB1, EGFR, IL2, INS, IL3, IL6, IFNG, BAX	105	202	16650	10.2051	2.32583e-05	4.40504e-08	2.90716e-08
GOTERM_BP_FAT	GO:0010468~regulation of gene expression	56	52.3364	5.08781e-09	IFITM3, APP, CSF2, PIK3CB, HMGB1, FGF2, TNF, ICAM1, IL10, RIPK3, PRKCD, IL18, MIF, F2, IL1A, IFNG, IRF3, IL1B, EZR, TLR4, TP53, TLR3, TLR2, CRP, CALCA, SRC, HIF1A, AGER, EGFR, RELA, INS, CXCR3, CCL5, CCL4, FYN, CD55, ELANE, JUN, XBP1, TGFB1, NOS2, IFNB1, FN1, MAPK14, SOD2, NFKB1, IL2, KLF2, VEGFA, CXCL10, IL6, IL5, BCL2, F2RL1, NFE2L2, HSPA1A	105	4345	16650	2.04373	2.47926e-05	4.68674e-08	3.09308e-08
GOTERM_BP_FAT	GO:0050678~regulation of epithelial cell proliferation	15	14.0187	5.21572e-09	XBP1, JUN, TGFB1, FGF2, HIF1A, EGFR, VEGFA, IL6, IFNG, CCL5, CXCR3, BAX, CCL2, GHRL, GLUL	105	300	16650	7.92857	2.54159e-05	4.79551e-08	3.16486e-08
GOTERM_BP_FAT	GO:0002262~myeloid cell homeostasis	11	10.2804	5.26076e-09	IL6, IFNG, CASP3, BAX, ISG15, HMGB1, MAPK14, HIF1A, KLF2, SOD1, VEGFA	105	124	16650	14.0668	2.56354e-05	4.82781e-08	3.18618e-08
GOTERM_BP_FAT	GO:0046907~intracellular transport	32	29.9065	5.28588e-09	APP, SRC, PTGS2, HIF1A, TNF, EGFR, PIK3CG, INS, CCL2, CD55, IL10, XBP1, JUN, TGFB1, PRKCD, IL18, PTPN11, ACTN4, MAPK14, F2, RHOA, SOD1, IL6, IFNG, CD209, IL1B, CRYAA, EZR, TP53, TLR4, TLR3, TLR2	105	1594	16650	3.18337	2.57577e-05	4.84174e-08	3.19537e-08
GOTERM_BP_FAT	GO:0051402~neuron apoptotic process	13	12.1495	5.33476e-09	APP, JUN, SOD2, HIF1A, HSPD1, SOD1, AIFM1, CASP3, BCL2, BAX, CCL2, FYN, TP53	105	204	16650	10.105	2.59959e-05	4.86821e-08	3.21284e-08
GOTERM_BP_FAT	GO:0030217~T cell differentiation	13	12.1495	5.33476e-09	XBP1, TGFB1, RIPK3, IFNB1, IL18, HMGB1, IL2, SOD1, IL6, IFNG, IL2RA, BCL2, B2M	105	204	16650	10.105	2.59959e-05	4.86821e-08	3.21284e-08
GOTERM_BP_FAT	GO:0006508~proteolysis	33	30.8411	5.51198e-09	APP, SRC, HMGB1, TNF, RELA, KNG1, HSPD1, AQP1, INS, AIFM1, PLAU, CASP3, CD55, ELANE, MBL2, IL10, XBP1, TGFB1, MMP2, FN1, ISG15, F2, MMP9, PTK2, NFKB1, VEGFA, IL6, IFNG, IL1B, BAX, TP53, HSPA1A, NFE2L2	105	1693	16650	3.09088	2.68595e-05	5.02054e-08	3.31337e-08
GOTERM_BP_FAT	GO:0034614~cellular response to reactive oxygen species	11	10.2804	5.68882e-09	IL6, AIFM1, SRC, PRKCD, SOD2, TNF, RELA, KLF2, AQP1, SOD1, NFE2L2	105	125	16650	13.9543	2.77212e-05	5.17194e-08	3.41329e-08
GOTERM_BP_FAT	GO:0042990~regulation of transcription factor import into nucleus	10	9.34579	5.75593e-09	IL10, XBP1, IL1B, IL18, PTGS2, TNF, TLR4, RHOA, TLR3, TLR2	105	92	16650	17.236	2.80483e-05	5.22321e-08	3.44713e-08
GOTERM_BP_FAT	GO:0007599~hemostasis	16	14.9533	6.10437e-09	IFNA1, IFNB1, SRC, PRKCD, PTPN11, PIK3CB, F2, RHOA, PIK3CG, KNG1, IL6, PLAU, F2RL1, FYN, TLR4, NFE2L2	105	358	16650	7.08699	2.97461e-05	5.51885e-08	3.64223e-08
GOTERM_BP_FAT	GO:0050817~coagulation	16	14.9533	6.10437e-09	IFNA1, IFNB1, SRC, PRKCD, PTPN11, PIK3CB, F2, RHOA, PIK3CG, KNG1, IL6, PLAU, F2RL1, FYN, TLR4, NFE2L2	105	358	16650	7.08699	2.97461e-05	5.51885e-08	3.64223e-08
GOTERM_BP_FAT	GO:0051896~regulation of protein kinase B signaling	11	10.2804	6.14747e-09	IL6, XBP1, TGFB1, SRC, IL18, TNF, FGF2, PTK2, EGFR, PIK3CG, INS	105	126	16650	13.8435	2.99562e-05	5.54752e-08	3.66116e-08
GOTERM_BP_FAT	GO:0019219~regulation of nucleobase-containing compound metabolic process	54	50.4673	6.20875e-09	IFITM3, APP, CSF2, CXCL8, HMGB1, FGF2, TNF, ICAM1, AIFM1, IL10, RIPK3, PRKCD, IL18, ACTN4, IL1A, IFNG, IRF3, IL1B, EZR, TLR4, TP53, TLR3, TLR2, CALCA, SRC, HIF1A, AGER, EGFR, RELA, INS, CXCR3, CCL5, CCL4, ELANE, JUN, XBP1, TGFB1, NOS2, IFNB1, MAPK14, SOD2, NFKB1, IL2, KLF2, VEGFA, CXCL10, IL3, CXCL11, IL6, IL5, BAX, F2RL1, NFE2L2, HSPA1A	105	4104	16650	2.08647	3.02548e-05	5.59247e-08	3.69082e-08
GOTERM_BP_FAT	GO:0042554~superoxide anion generation	7	6.54206	6.30711e-09	CRP, TGFB1, PRKCD, F2RL1, SOD2, EGFR, SOD1	105	24	16650	46.25	3.07341e-05	5.67058e-08	3.74238e-08
GOTERM_BP_FAT	GO:0042991~transcription factor import into nucleus	10	9.34579	6.3399e-09	IL10, XBP1, IL1B, IL18, PTGS2, TNF, TLR4, RHOA, TLR3, TLR2	105	93	16650	17.0507	3.08938e-05	5.68956e-08	3.7549e-08
GOTERM_BP_FAT	GO:0010556~regulation of macromolecule biosynthetic process	54	50.4673	6.37975e-09	IFITM3, APP, CSF2, HMGB1, FGF2, TNF, ICAM1, IL10, RIPK3, PRKCD, IL18, ACTN4, F2, IL1A, IFNG, IRF3, IL1B, EZR, TLR4, TP53, TLR3, TLR2, CALCA, SRC, HIF1A, AGER, EGFR, RELA, INS, CXCR3, CCL5, CCL4, CCL2, ELANE, JUN, XBP1, TGFB1, IFNB1, MAPK14, SOD2, NFKB1, IL2, KLF2, VEGFA, CXCL10, IL3, IL6, IL5, IL9, BCL2, F2RL1, GHRL, NFE2L2, HSPA1A	105	4107	16650	2.08494	3.1088e-05	5.7148e-08	3.77156e-08
GOTERM_BP_FAT	GO:0006629~lipid metabolic process	29	27.1028	6.55949e-09	APP, SRC, PIK3CB, PTGS2, FGF2, TNF, EGFR, PIK3CG, INS, SGPL1, TTR, NEU1, FYN, PLCG1, SFTPB, XBP1, TGFB1, PRKCD, PTPN11, MIF, MAPK14, F2, PTK2, NFKB1, SOD1, IFNG, IL1B, BAX, TLR2	105	1330	16650	3.45757	3.19639e-05	5.86503e-08	3.8707e-08
GOTERM_BP_FAT	GO:2001243~negative regulation of intrinsic apoptotic signaling pathway	10	9.34579	6.97516e-09	XBP1, SRC, BCL2, MIF, SOD2, HIF1A, MMP9, HSPA1A, NFE2L2, INS	105	94	16650	16.8693	3.39894e-05	6.22526e-08	4.10844e-08
GOTERM_BP_FAT	GO:0061041~regulation of wound healing	11	10.2804	7.16415e-09	XBP1, PLAU, PRKCD, F2RL1, HMGB1, F2, AGER, FGF2, TLR4, KNG1, NFE2L2	105	128	16650	13.6272	3.49103e-05	6.38225e-08	4.21205e-08
GOTERM_BP_FAT	GO:0009887~organ morphogenesis	25	23.3645	7.22486e-09	SRC, AQP5, FGF2, HIF1A, TNF, RELA, EGFR, AQP1, SGPL1, CCL2, SFTPB, XBP1, JUN, TGFB1, MMP2, MAPK14, RHOA, PTK2, SOD1, VEGFA, IL6, IFNG, BCL2, BAX, EZR	105	992	16650	3.99626	3.52061e-05	6.42459e-08	4.23999e-08
GOTERM_BP_FAT	GO:0032870~cellular response to hormone stimulus	20	18.6916	7.53523e-09	XBP1, JUN, TGFB1, IFNB1, SRC, PRKCD, PTPN11, DEFA1, EGFR, RELA, PTK2, NFKB1, AQP1, INS, IL6, AIFM1, IL1B, CCL2, FYN, GHRL	105	616	16650	5.14842	3.67185e-05	6.68838e-08	4.41408e-08
GOTERM_BP_FAT	GO:0043536~positive regulation of blood vessel endothelial cell migration	7	6.54206	8.25699e-09	TGFB1, PLCG1, MAPK14, PTGS2, FGF2, NFE2L2, VEGFA	105	25	16650	44.4	4.02355e-05	7.3157e-08	4.82809e-08
GOTERM_BP_FAT	GO:0043200~response to amino acid	10	9.34579	8.41505e-09	IL6, XBP1, CASP3, MMP2, CCL2, TNF, RELA, EGFR, ICAM1, INS	105	96	16650	16.5179	4.10057e-05	7.4422e-08	4.91158e-08
GOTERM_BP_FAT	GO:0051171~regulation of nitrogen compound metabolic process	56	52.3364	8.5438e-09	IFITM3, APP, CSF2, CXCL8, HMGB1, FGF2, TNF, ICAM1, AIFM1, IL10, RIPK3, PRKCD, IL18, ACTN4, IL1A, IFNG, IRF3, IL1B, EZR, TLR5, TLR4, TP53, TLR3, TLR2, CALCA, SRC, PTGS2, HIF1A, AGER, EGFR, RELA, INS, CXCR3, CCL5, CCL4, ELANE, JUN, XBP1, TGFB1, NOS2, IFNB1, MAPK14, SOD2, NFKB1, IL2, KLF2, VEGFA, CXCL10, IL3, CXCL11, IL6, IL5, BAX, F2RL1, NFE2L2, HSPA1A	105	4404	16650	2.01635	4.1633e-05	7.54238e-08	4.97769e-08
GOTERM_BP_FAT	GO:0043270~positive regulation of ion transport	13	12.1495	8.67324e-09	ACTN4, MIF, F2, CXCL10, CXCL11, IL1B, CCL5, CXCR3, CCL4, BAX, CCL2, PLCG1, B2M	105	213	16650	9.67807	4.22638e-05	7.6428e-08	5.04396e-08
GOTERM_BP_FAT	GO:0060402~calcium ion transport into cytosol	11	10.2804	8.96891e-09	CXCL10, CXCL11, CALCA, TGFB1, CXCR3, BCL2, BAX, PLCG1, CCR5, F2, FGF2	105	131	16650	13.3152	4.37045e-05	7.88908e-08	5.2065e-08
GOTERM_BP_FAT	GO:0034103~regulation of tissue remodeling	9	8.41121	9.56519e-09	IL6, CALCA, TGFB1, SRC, IL18, BAX, AGER, EGFR, IL2	105	68	16650	20.9874	4.66101e-05	8.39841e-08	5.54264e-08
GOTERM_BP_FAT	GO:1901653~cellular response to peptide	15	14.0187	9.70838e-09	XBP1, TGFB1, SRC, PRKCD, PTPN11, RELA, PTK2, NFKB1, KLF2, INS, IL6, IL1B, CCL2, FYN, GHRL	105	315	16650	7.55102	4.73078e-05	8.5088e-08	5.61549e-08
GOTERM_BP_FAT	GO:0042102~positive regulation of T cell proliferation	10	9.34579	1.0109e-08	IL6, IFNG, CCL5, IL1B, IL2RA, IL18, HMGB1, AGER, CD55, IL2	105	98	16650	16.1808	4.92599e-05	8.844e-08	5.83671e-08
GOTERM_BP_FAT	GO:0060401~cytosolic calcium ion transport	11	10.2804	1.03854e-08	CXCL10, CXCL11, CALCA, TGFB1, CXCR3, BCL2, BAX, PLCG1, CCR5, F2, FGF2	105	133	16650	13.1149	5.06067e-05	9.06954e-08	5.98556e-08
GOTERM_BP_FAT	GO:0060284~regulation of cell development	23	21.4953	1.05416e-08	APP, TGFB1, FN1, ACTN4, F2, FGF2, HIF1A, TNF, RHOA, IL2, RELA, PTK2, INS, VEGFA, IL6, IL5, IFNG, IL1B, BCL2, FYN, B2M, NFE2L2, TLR2	105	851	16650	4.28571	5.13678e-05	9.18947e-08	6.06471e-08
GOTERM_BP_FAT	GO:0032928~regulation of superoxide anion generation	6	5.60748	1.06734e-08	CRP, TGFB1, PRKCD, F2RL1, EGFR, SOD1	105	13	16650	73.1868	5.20101e-05	9.28776e-08	6.12958e-08
GOTERM_BP_FAT	GO:0043534~blood vessel endothelial cell migration	9	8.41121	1.07642e-08	TGFB1, PLCG1, HMGB1, MAPK14, PTGS2, FGF2, RHOA, NFE2L2, VEGFA	105	69	16650	20.6832	5.24526e-05	9.33345e-08	6.15973e-08
GOTERM_BP_FAT	GO:0042509~regulation of tyrosine phosphorylation of STAT protein	9	8.41121	1.07642e-08	IL3, IL6, CSF2, IFNG, CCL5, IL18, FYN, IL2, VEGFA	105	69	16650	20.6832	5.24526e-05	9.33345e-08	6.15973e-08
GOTERM_BP_FAT	GO:0032102~negative regulation of response to external stimulus	14	13.0841	1.15669e-08	IL10, PRKCD, F2, FGF2, AGER, IL2, KNG1, NFKB1, INS, PLAU, IL2RA, CCL2, GHRL, ELANE	105	267	16650	8.31461	5.63639e-05	1.00116e-07	6.6073e-08
GOTERM_BP_FAT	GO:0050880~regulation of blood vessel size	11	10.2804	1.19964e-08	CRP, CALCA, NOS2, F2RL1, SOD2, PTGS2, KNG1, EGFR, ICAM1, SOD1, INS	105	135	16650	12.9206	5.84569e-05	1.0365e-07	6.84052e-08
GOTERM_BP_FAT	GO:0002688~regulation of leukocyte chemotaxis	10	9.34579	1.20944e-08	CXCL10, IL6, CXCL11, CXCL8, CCL5, CCL4, F2RL1, CCL2, HMGB1, VEGFA	105	100	16650	15.8571	5.89343e-05	1.04127e-07	6.87202e-08
GOTERM_BP_FAT	GO:0014065~phosphatidylinositol 3-kinase signaling	10	9.34579	1.20944e-08	XBP1, CCL5, IL18, F2RL1, FYN, PIK3CB, F2, PTK2, PIK3CG, INS	105	100	16650	15.8571	5.89343e-05	1.04127e-07	6.87202e-08
GOTERM_BP_FAT	GO:0031329~regulation of cellular catabolic process	16	14.9533	1.22211e-08	IL10, XBP1, PRKCD, HMGB1, HIF1A, TNF, PIK3CG, PTK2, INS, IFNG, AIFM1, IL1B, BAX, EZR, HSPA1A, NFE2L2	105	377	16650	6.72982	5.95515e-05	1.05032e-07	6.93174e-08
GOTERM_BP_FAT	GO:0046683~response to organophosphorus	11	10.2804	1.2882e-08	APP, JUN, IL1B, CCL2, EZR, PTGS2, RELA, PIK3CG, HSPD1, AQP1, SOD1	105	136	16650	12.8256	6.27718e-05	1.10323e-07	7.28091e-08
GOTERM_BP_FAT	GO:0035150~regulation of tube size	11	10.2804	1.2882e-08	CRP, CALCA, NOS2, F2RL1, SOD2, PTGS2, KNG1, EGFR, ICAM1, SOD1, INS	105	136	16650	12.8256	6.27718e-05	1.10323e-07	7.28091e-08
GOTERM_BP_FAT	GO:0071260~cellular response to mechanical stimulus	9	8.41121	1.35564e-08	TGFB1, IL1B, TLR5, PTGS2, TLR4, EGFR, NFKB1, TLR3, AQP1	105	71	16650	20.1006	6.60582e-05	1.15895e-07	7.64866e-08
GOTERM_BP_FAT	GO:0044057~regulation of system process	18	16.8224	1.38841e-08	IL10, CRP, CALCA, NOS2, PTPN11, PTGS2, EGFR, IL2, PIK3CG, AQP1, INS, ICAM1, SOD1, IL6, IFNG, IL1B, F2RL1, GHRL	105	504	16650	5.66327	6.76551e-05	1.18489e-07	7.81985e-08
GOTERM_BP_FAT	GO:0007399~nervous system development	37	34.5794	1.39927e-08	APP, SRC, HMGB1, FGF2, HIF1A, AGER, RELA, EGFR, AQP1, AIFM1, CASP3, CCL2, FYN, B2M, XBP1, JUN, TGFB1, SIGMAR1, FN1, PTPN11, F2, SOD2, RHOA, IL2, PTK2, SOD1, VEGFA, IL3, IL6, IFNG, BCL2, BAX, GHRL, EZR, TLR4, NFE2L2, TLR2	105	2170	16650	2.70375	6.81841e-05	1.19207e-07	7.86723e-08
GOTERM_BP_FAT	GO:0043254~regulation of protein complex assembly	16	14.9533	1.40709e-08	JUN, TGFB1, CSF2, SRC, PRKCD, PTPN11, HMGB1, FGF2, TNF, INS, ICAM1, VEGFA, IL5, BAX, TP53, TLR4	105	381	16650	6.65917	6.85651e-05	1.19664e-07	7.89738e-08
GOTERM_BP_FAT	GO:0008015~blood circulation	18	16.8224	1.47179e-08	CRP, CALCA, TGFB1, NOS2, SRC, PTGS2, SOD2, EGFR, IL2, PIK3CG, KNG1, INS, ICAM1, SOD1, VEGFA, CXCL10, IFNG, F2RL1	105	506	16650	5.64088	7.17179e-05	1.24949e-07	8.24615e-08
GOTERM_BP_FAT	GO:0032609~interferon-gamma production	10	9.34579	1.57121e-08	IL10, IL1B, IL18, F2RL1, HMGB1, TNF, TLR4, IL2, TLR3, HSPD1	105	103	16650	15.3953	7.6562e-05	1.33156e-07	8.78783e-08
GOTERM_BP_FAT	GO:0045073~regulation of chemokine biosynthetic process	6	5.60748	1.65208e-08	IL6, IFNG, IL1B, TNF, ELANE, TLR3	105	14	16650	67.9592	8.05028e-05	1.39562e-07	9.21056e-08
GOTERM_BP_FAT	GO:0003013~circulatory system process	18	16.8224	1.65252e-08	CRP, CALCA, TGFB1, NOS2, SRC, PTGS2, SOD2, EGFR, IL2, PIK3CG, KNG1, INS, ICAM1, SOD1, VEGFA, CXCL10, IFNG, F2RL1	105	510	16650	5.59664	8.05239e-05	1.39562e-07	9.21056e-08
GOTERM_BP_FAT	GO:0007260~tyrosine phosphorylation of STAT protein	9	8.41121	1.69529e-08	IL3, IL6, CSF2, IFNG, CCL5, IL18, FYN, IL2, VEGFA	105	73	16650	19.5499	8.26082e-05	1.42927e-07	9.43263e-08
GOTERM_BP_FAT	GO:2001237~negative regulation of extrinsic apoptotic signaling pathway	10	9.34579	1.86203e-08	IL1A, CSF2, SRC, IL1B, BCL2, FYN, TNF, RELA, ICAM1, HSPA1A	105	105	16650	15.102	9.07326e-05	1.56713e-07	1.03425e-07
GOTERM_BP_FAT	GO:0014066~regulation of phosphatidylinositol 3-kinase signaling	11	10.2804	1.95167e-08	CCL5, IL18, F2RL1, PTPN11, FYN, PIK3CB, F2, FGF2, PTK2, EGFR, INS	105	142	16650	12.2837	9.51005e-05	1.63974e-07	1.08217e-07
GOTERM_BP_FAT	GO:0050709~negative regulation of protein secretion	10	9.34579	2.02434e-08	IL10, IL6, IL1B, FN1, F2RL1, PTPN11, GHRL, EZR, TNF, INS	105	106	16650	14.9596	9.86413e-05	1.69787e-07	1.12053e-07
GOTERM_BP_FAT	GO:0042116~macrophage activation	8	7.47664	2.09457e-08	IL10, JUN, CSF2, HMGB1, TLR4, TLR3, HSPD1, TLR2	105	49	16650	25.8892	0.000102063	1.75375e-07	1.15741e-07
GOTERM_BP_FAT	GO:1901655~cellular response to ketone	9	8.41121	2.106e-08	IL6, TGFB1, AIFM1, IFNB1, SRC, CCL2, EGFR, KLF2, AQP1	105	75	16650	19.0286	0.00010262	1.75836e-07	1.16045e-07
GOTERM_BP_FAT	GO:1902532~negative regulation of intracellular signal transduction	17	15.8879	2.10729e-08	IL10, XBP1, SRC, PRKCD, MIF, SOD2, HIF1A, MMP9, RELA, INS, IL1B, BCL2, F2RL1, EZR, TLR4, HSPA1A, NFE2L2	105	454	16650	5.9377	0.000102683	1.75836e-07	1.16045e-07
GOTERM_BP_FAT	GO:0044087~regulation of cellular component biogenesis	22	20.5607	2.15752e-08	JUN, TGFB1, CSF2, SRC, PRKCD, PTPN11, HMGB1, FGF2, TNF, RHOA, PTK2, INS, ICAM1, VEGFA, IL5, BAX, F2RL1, GHRL, EZR, TP53, TLR4, HSPA1A	105	807	16650	4.32289	0.00010513	1.79719e-07	1.18608e-07
GOTERM_BP_FAT	GO:0019058~viral life cycle	17	15.8879	2.17304e-08	IFITM3, JUN, CXCL8, IFNB1, ISG15, TNF, ICAM1, CD209, CCL5, MRC1, CCL4, BCL2, CCL2, ITGA5, CCR5, CD55, HSPA1A	105	455	16650	5.92465	0.000105887	1.80703e-07	1.19258e-07
GOTERM_BP_FAT	GO:0032606~type I interferon production	10	9.34579	2.38647e-08	IL10, IRF3, ISG15, HMGB1, TLR4, RELA, NFKB1, TLR3, HSPD1, TLR2	105	108	16650	14.6825	0.000116286	1.98114e-07	1.30748e-07
GOTERM_BP_FAT	GO:0072594~establishment of protein localization to organelle	20	18.6916	2.64078e-08	IL10, XBP1, JUN, TGFB1, PRKCD, IL18, PTGS2, MAPK14, TNF, RHOA, EGFR, IL6, IFNG, IL1B, BCL2, BAX, TP53, TLR4, TLR3, TLR2	105	666	16650	4.7619	0.000128677	2.18852e-07	1.44435e-07
GOTERM_BP_FAT	GO:0003008~system process	35	32.7103	2.73325e-08	CRP, APP, CALCA, SRC, AQP5, PTGS2, HIF1A, EGFR, PIK3CG, KNG1, AQP1, INS, ICAM1, CASP3, FYN, IL10, JUN, TGFB1, NOS2, PTPN11, SOD2, IL2, SOD1, VEGFA, CXCL10, IL6, IFNG, IL1B, BCL2, F2RL1, GHRL, ITGA5, CRYAA, EZR, TLR4	105	2014	16650	2.75571	0.000133183	2.26131e-07	1.49238e-07
GOTERM_BP_FAT	GO:2001239~regulation of extrinsic apoptotic signaling pathway in absence of ligand	8	7.47664	2.79433e-08	IL1A, CSF2, IL1B, BCL2, BAX, FYN, TNF, HSPA1A	105	51	16650	24.8739	0.000136159	2.30402e-07	1.52057e-07
GOTERM_BP_FAT	GO:0002637~regulation of immunoglobulin production	8	7.47664	2.79433e-08	IL10, IL6, XBP1, TGFB1, IL5, IFNG, TNF, IL2	105	51	16650	24.8739	0.000136159	2.30402e-07	1.52057e-07
GOTERM_BP_FAT	GO:0045637~regulation of myeloid cell differentiation	12	11.215	2.99253e-08	IL3, CALCA, JUN, IL5, IFNG, ISG15, HMGB1, MAPK14, HIF1A, TNF, TLR4, TLR3	105	191	16650	9.9626	0.000145815	2.46327e-07	1.62567e-07
GOTERM_BP_FAT	GO:0006366~transcription from RNA polymerase II promoter	33	30.8411	3.16218e-08	APP, HMGB1, FGF2, HIF1A, TNF, RELA, EGFR, CXCR3, ELANE, IL10, XBP1, JUN, TGFB1, IFNB1, IL18, MAPK14, IL2, NFKB1, KLF2, VEGFA, IL1A, CXCL10, IL6, IFNG, IRF3, IL1B, F2RL1, EZR, TP53, TLR4, TLR3, NFE2L2, TLR2	105	1820	16650	2.8752	0.000154081	2.59853e-07	1.71493e-07
GOTERM_BP_FAT	GO:0002709~regulation of T cell mediated immunity	8	7.47664	3.21256e-08	IL6, RIPK3, IFNB1, IL1B, HMGB1, AGER, B2M, HSPD1	105	52	16650	24.3956	0.000156536	2.63549e-07	1.73933e-07
GOTERM_BP_FAT	GO:0032479~regulation of type I interferon production	10	9.34579	3.28404e-08	IL10, IRF3, ISG15, HMGB1, TLR4, RELA, NFKB1, TLR3, HSPD1, TLR2	105	112	16650	14.1582	0.000160019	2.6896e-07	1.77504e-07
GOTERM_BP_FAT	GO:0045580~regulation of T cell differentiation	10	9.34579	3.54991e-08	IL6, XBP1, TGFB1, IFNG, IFNB1, IL2RA, IL18, HMGB1, IL2, SOD1	105	113	16650	14.0329	0.000172972	2.90247e-07	1.91552e-07
GOTERM_BP_FAT	GO:0044130~negative regulation of growth of symbiont in host	6	5.60748	3.56893e-08	IL10, IFNG, TNF, CAMP, ELANE, MBL2	105	16	16650	59.4643	0.000173899	2.90826e-07	1.91935e-07
GOTERM_BP_FAT	GO:0044146~negative regulation of growth of symbiont involved in interaction with host	6	5.60748	3.56893e-08	IL10, IFNG, TNF, CAMP, ELANE, MBL2	105	16	16650	59.4643	0.000173899	2.90826e-07	1.91935e-07
GOTERM_BP_FAT	GO:0009620~response to fungus	8	7.47664	3.68258e-08	APP, IL6, CALCA, TGFB1, DEFA1, TLR4, CAMP, ELANE	105	53	16650	23.9353	0.000179436	2.99586e-07	1.97716e-07
GOTERM_BP_FAT	GO:0071375~cellular response to peptide hormone stimulus	14	13.0841	3.76961e-08	XBP1, TGFB1, SRC, PRKCD, PTPN11, RELA, PTK2, NFKB1, INS, IL6, IL1B, CCL2, FYN, GHRL	105	295	16650	7.52542	0.000183676	3.06155e-07	2.02051e-07
GOTERM_BP_FAT	GO:0006357~regulation of transcription from RNA polymerase II promoter	33	30.8411	3.84352e-08	APP, HMGB1, FGF2, HIF1A, TNF, RELA, EGFR, CXCR3, ELANE, IL10, XBP1, JUN, TGFB1, IFNB1, IL18, MAPK14, SOD2, IL2, NFKB1, KLF2, VEGFA, IL1A, CXCL10, IL6, IFNG, IL1B, F2RL1, EZR, TP53, TLR4, TLR3, NFE2L2, TLR2	105	1835	16650	2.85169	0.000187277	3.11639e-07	2.0567e-07
GOTERM_BP_FAT	GO:0010574~regulation of vascular endothelial growth factor production	7	6.54206	4.07812e-08	IL1A, IL6, TGFB1, IL1B, CCL2, PTGS2, HIF1A	105	32	16650	34.6875	0.000198707	3.30111e-07	2.17861e-07
GOTERM_BP_FAT	GO:0010594~regulation of endothelial cell migration	10	9.34579	4.13857e-08	TGFB1, PLCG1, HMGB1, MAPK14, PTGS2, FGF2, PTK2, RHOA, NFE2L2, VEGFA	105	115	16650	13.7888	0.000201652	3.33895e-07	2.20358e-07
GOTERM_BP_FAT	GO:0031503~protein complex localization	10	9.34579	4.13857e-08	IL10, IL1B, IL18, EZR, PTGS2, TNF, TLR4, RHOA, TLR3, TLR2	105	115	16650	13.7888	0.000201652	3.33895e-07	2.20358e-07
GOTERM_BP_FAT	GO:0043542~endothelial cell migration	11	10.2804	4.23712e-08	CALCA, TGFB1, PLCG1, HMGB1, MAPK14, PTGS2, FGF2, PTK2, RHOA, NFE2L2, VEGFA	105	154	16650	11.3265	0.000206454	3.41281e-07	2.25233e-07
GOTERM_BP_FAT	GO:0070098~chemokine-mediated signaling pathway	9	8.41121	4.29197e-08	CXCL10, CXCL11, CXCL8, CCL5, CXCR3, CCL4, CCL2, CCR5, HIF1A	105	82	16650	17.4042	0.000209126	3.45128e-07	2.27772e-07
GOTERM_BP_FAT	GO:0018105~peptidyl-serine phosphorylation	13	12.1495	4.30358e-08	TGFB1, IFNA1, IFNB1, SRC, PRKCD, MIF, MAPK14, TNF, VEGFA, IL6, IFNG, BCL2, BAX	105	246	16650	8.37979	0.000209692	3.45492e-07	2.28012e-07
GOTERM_BP_FAT	GO:0001894~tissue homeostasis	12	11.215	4.33423e-08	IL6, CALCA, SRC, ALB, BCL2, BAX, PTPN11, B2M, TLR4, EGFR, SOD1, VEGFA	105	198	16650	9.61039	0.000211185	3.4738e-07	2.29258e-07
GOTERM_BP_FAT	GO:2000106~regulation of leukocyte apoptotic process	9	8.41121	4.72545e-08	IL10, RIPK3, CCL5, BAX, MIF, HIF1A, TP53, IL2, ICAM1	105	83	16650	17.1945	0.000230244	3.78113e-07	2.49541e-07
GOTERM_BP_FAT	GO:0050918~positive chemotaxis	8	7.47664	4.79882e-08	CXCL8, CCL5, F2RL1, HMGB1, MIF, AGER, FGF2, VEGFA	105	55	16650	23.0649	0.000233819	3.83355e-07	2.53e-07
GOTERM_BP_FAT	GO:0045862~positive regulation of proteolysis	15	14.0187	4.84355e-08	APP, XBP1, SRC, FN1, HMGB1, TNF, PTK2, HSPD1, IFNG, AIFM1, IL1B, CASP3, BAX, HSPA1A, NFE2L2	105	358	16650	6.64405	0.000235998	3.86295e-07	2.5494e-07
GOTERM_BP_FAT	GO:0044144~modulation of growth of symbiont involved in interaction with host	6	5.60748	5.03095e-08	IL10, IFNG, TNF, CAMP, ELANE, MBL2	105	17	16650	55.9664	0.000245128	3.99932e-07	2.6394e-07
GOTERM_BP_FAT	GO:0044126~regulation of growth of symbiont in host	6	5.60748	5.03095e-08	IL10, IFNG, TNF, CAMP, ELANE, MBL2	105	17	16650	55.9664	0.000245128	3.99932e-07	2.6394e-07
GOTERM_BP_FAT	GO:0090066~regulation of anatomical structure size	17	15.8879	5.12271e-08	CRP, CALCA, NOS2, PRKCD, FN1, AQP5, PTGS2, SOD2, EGFR, KNG1, AQP1, INS, ICAM1, SOD1, VEGFA, F2RL1, EZR	105	484	16650	5.56966	0.000249599	4.06563e-07	2.68317e-07
GOTERM_BP_FAT	GO:0030100~regulation of endocytosis	12	11.215	5.32089e-08	TGFB1, SRC, IL1B, F2RL1, CCL2, ACTN4, HMGB1, PIK3CB, TNF, B2M, MBL2, VEGFA	105	202	16650	9.42008	0.000259254	4.21605e-07	2.78244e-07
GOTERM_BP_FAT	GO:0051851~modification by host of symbiont morphology or physiology	8	7.47664	5.45644e-08	JUN, CCL5, CCL4, F2RL1, CAMP, ELANE, AQP1, MBL2	105	56	16650	22.6531	0.000265857	4.31643e-07	2.84869e-07
GOTERM_BP_FAT	GO:0034405~response to fluid shear stress	7	6.54206	5.9916e-08	XBP1, TGFB1, CSF2, SRC, PTGS2, KLF2, NFE2L2	105	34	16650	32.6471	0.000291928	4.72909e-07	3.12102e-07
GOTERM_BP_FAT	GO:0033135~regulation of peptidyl-serine phosphorylation	10	9.34579	5.99749e-08	IL6, TGFB1, IFNG, IFNA1, IFNB1, BCL2, BAX, MIF, TNF, VEGFA	105	120	16650	13.2143	0.000292215	4.72909e-07	3.12102e-07
GOTERM_BP_FAT	GO:0050679~positive regulation of epithelial cell proliferation	11	10.2804	6.4595e-08	IL6, XBP1, JUN, TGFB1, CCL5, CCL2, GLUL, HIF1A, FGF2, EGFR, VEGFA	105	161	16650	10.8341	0.000314722	5.07696e-07	3.35061e-07
GOTERM_BP_FAT	GO:2001236~regulation of extrinsic apoptotic signaling pathway	11	10.2804	6.4595e-08	IL1A, CSF2, SRC, IL1B, BCL2, BAX, FYN, TNF, RELA, ICAM1, HSPA1A	105	161	16650	10.8341	0.000314722	5.07696e-07	3.35061e-07
GOTERM_BP_FAT	GO:0051702~interaction with symbiont	8	7.47664	7.00225e-08	JUN, CCL5, CCL4, F2RL1, CAMP, ELANE, AQP1, MBL2	105	58	16650	21.8719	0.000341162	5.49468e-07	3.62629e-07
GOTERM_BP_FAT	GO:0010522~regulation of calcium ion transport into cytosol	9	8.41121	7.50539e-08	CXCL10, CXCL11, CALCA, TGFB1, CXCR3, BCL2, BAX, PLCG1, F2	105	88	16650	16.2175	0.000365671	5.88003e-07	3.8806e-07
GOTERM_BP_FAT	GO:0018209~peptidyl-serine modification	13	12.1495	7.57168e-08	TGFB1, IFNA1, IFNB1, SRC, PRKCD, MIF, MAPK14, TNF, VEGFA, IL6, IFNG, BCL2, BAX	105	259	16650	7.95918	0.0003689	5.92244e-07	3.90859e-07
GOTERM_BP_FAT	GO:0002705~positive regulation of leukocyte mediated immunity	9	8.41121	8.20443e-08	IL6, TGFB1, IFNG, IL1B, F2RL1, TNF, B2M, IL2, HSPD1	105	89	16650	16.0353	0.000399722	6.40708e-07	4.22844e-07
GOTERM_BP_FAT	GO:0050792~regulation of viral process	13	12.1495	8.58643e-08	IFITM3, JUN, CXCL8, IFNB1, ISG15, TNF, IL2RA, CCL5, CCL4, BCL2, FYN, B2M, MBL2	105	262	16650	7.86805	0.000418329	6.69467e-07	4.41823e-07
GOTERM_BP_FAT	GO:0050871~positive regulation of B cell activation	9	8.41121	8.95873e-08	IL6, XBP1, TGFB1, IL5, IFNG, BCL2, MIF, TLR4, IL2	105	90	16650	15.8571	0.000436464	6.96267e-07	4.5951e-07
GOTERM_BP_FAT	GO:0033138~positive regulation of peptidyl-serine phosphorylation	9	8.41121	8.95873e-08	IL6, TGFB1, IFNG, IFNA1, IFNB1, BCL2, MIF, TNF, VEGFA	105	90	16650	15.8571	0.000436464	6.96267e-07	4.5951e-07
GOTERM_BP_FAT	GO:0050864~regulation of B cell activation	10	9.34579	9.80487e-08	IL10, IL6, XBP1, TGFB1, IL5, IFNG, BCL2, MIF, TLR4, IL2	105	127	16650	12.4859	0.000477677	7.60814e-07	5.02109e-07
GOTERM_BP_FAT	GO:2001240~negative regulation of extrinsic apoptotic signaling pathway in absence of ligand	7	6.54206	1.02012e-07	IL1A, CSF2, IL1B, BCL2, FYN, TNF, HSPA1A	105	37	16650	30	0.000496983	7.87807e-07	5.19924e-07
GOTERM_BP_FAT	GO:1901099~negative regulation of signal transduction in absence of ligand	7	6.54206	1.02012e-07	IL1A, CSF2, IL1B, BCL2, FYN, TNF, HSPA1A	105	37	16650	30	0.000496983	7.87807e-07	5.19924e-07
GOTERM_BP_FAT	GO:0072678~T cell migration	7	6.54206	1.02012e-07	CXCL10, CXCL11, RIPK3, CCL5, CXCR3, CCL2, PIK3CG	105	37	16650	30	0.000496983	7.87807e-07	5.19924e-07
GOTERM_BP_FAT	GO:0008285~negative regulation of cell proliferation	19	17.757	1.03296e-07	IL10, JUN, TGFB1, CXCL8, PTGS2, SOD2, FGF2, IL2, IL1A, IL6, IFNG, IL1B, IL2RA, CXCR3, BCL2, BAX, GHRL, TP53, TLR2	105	651	16650	4.62804	0.000503234	7.96457e-07	5.25632e-07
GOTERM_BP_FAT	GO:0044702~single organism reproductive process	26	24.2991	1.04559e-07	CALCA, CSF2, SRC, PTGS2, HIF1A, EGFR, ICAM1, SGPL1, CCL2, CD55, IL10, TGFB1, MMP2, PTPN11, MAPK14, MMP9, PTK2, SOD1, VEGFA, IL1A, IL1B, BCL2, BAX, GHRL, TLR5, TLR3	105	1231	16650	3.34919	0.000509387	8.04924e-07	5.3122e-07
GOTERM_BP_FAT	GO:1901654~response to ketone	11	10.2804	1.07885e-07	IL6, TGFB1, AIFM1, IFNB1, SRC, CCL2, RELA, EGFR, KLF2, AQP1, TLR2	105	170	16650	10.2605	0.000525585	8.29216e-07	5.47252e-07
GOTERM_BP_FAT	GO:0015833~peptide transport	13	12.1495	1.09882e-07	NOS2, PTPN11, HIF1A, TNF, EGFR, INS, IL6, IFNG, CD209, IL1B, CCL5, GHRL, GLUL	105	268	16650	7.6919	0.000535314	8.4324e-07	5.56507e-07
GOTERM_BP_FAT	GO:0007267~cell-cell signaling	29	27.1028	1.10962e-07	CALCA, SRC, PTGS2, FGF2, HIF1A, TNF, EGFR, INS, CCL5, CCL4, CCL2, CCR5, GLUL, IL10, NOS2, IL18, PTPN11, MAPK14, RHOA, IL2, NFKB1, IL3, CXCL10, CXCL11, IL6, IFNG, IL1B, GHRL, TLR2	105	1517	16650	3.03136	0.000540572	8.50186e-07	5.61091e-07
GOTERM_BP_FAT	GO:0060429~epithelium development	24	22.4299	1.16678e-07	IL10, XBP1, JUN, TGFB1, SRC, FGF2, HIF1A, TNF, RHOA, EGFR, RELA, KLF2, ICAM1, SOD1, VEGFA, IL6, IFNG, IL1B, CASP3, BCL2, BAX, F2RL1, ITGA5, EZR	105	1060	16650	3.5903	0.00056841	8.92577e-07	5.89068e-07
GOTERM_BP_FAT	GO:0044110~growth involved in symbiotic interaction	6	5.60748	1.24187e-07	IL10, IFNG, TNF, CAMP, ELANE, MBL2	105	20	16650	47.5714	0.000604982	9.44096e-07	6.23068e-07
GOTERM_BP_FAT	GO:0044117~growth of symbiont in host	6	5.60748	1.24187e-07	IL10, IFNG, TNF, CAMP, ELANE, MBL2	105	20	16650	47.5714	0.000604982	9.44096e-07	6.23068e-07
GOTERM_BP_FAT	GO:0032647~regulation of interferon-alpha production	6	5.60748	1.24187e-07	IL10, IRF3, HMGB1, TLR4, TLR3, HSPD1	105	20	16650	47.5714	0.000604982	9.44096e-07	6.23068e-07
GOTERM_BP_FAT	GO:0044116~growth of symbiont involved in interaction with host	6	5.60748	1.24187e-07	IL10, IFNG, TNF, CAMP, ELANE, MBL2	105	20	16650	47.5714	0.000604982	9.44096e-07	6.23068e-07
GOTERM_BP_FAT	GO:0030001~metal ion transport	21	19.6262	1.25955e-07	CALCA, TGFB1, ACTN4, F2, PTGS2, FGF2, PIK3CG, AQP1, ICAM1, CXCL10, CXCL11, CCL5, CXCR3, CCL4, BCL2, BAX, CCL2, FYN, PLCG1, CCR5, B2M	105	814	16650	4.09091	0.00061359	9.56041e-07	6.30952e-07
GOTERM_BP_FAT	GO:0031331~positive regulation of cellular catabolic process	13	12.1495	1.29067e-07	XBP1, PRKCD, HMGB1, HIF1A, TNF, PTK2, INS, IFNG, IL1B, BAX, EZR, HSPA1A, NFE2L2	105	272	16650	7.57878	0.000628748	9.78142e-07	6.45538e-07
GOTERM_BP_FAT	GO:1990267~response to transition metal nanoparticle	10	9.34579	1.36794e-07	IL1A, BCL2, SOD2, PTGS2, B2M, RELA, EGFR, AQP1, ICAM1, SOD1	105	132	16650	12.013	0.000666375	1.03509e-06	6.8312e-07
GOTERM_BP_FAT	GO:0002377~immunoglobulin production	9	8.41121	1.48602e-07	IL10, IL6, XBP1, TGFB1, IL5, IFNG, TNF, IL2, HSPD1	105	96	16650	14.8661	0.000723875	1.12269e-06	7.40936e-07
GOTERM_BP_FAT	GO:0031334~positive regulation of protein complex assembly	12	11.215	1.52272e-07	JUN, TGFB1, CSF2, IL5, SRC, BAX, TNF, TP53, FGF2, TLR4, ICAM1, VEGFA	105	224	16650	8.4949	0.000741745	1.14864e-06	7.58059e-07
GOTERM_BP_FAT	GO:0032607~interferon-alpha production	6	5.60748	1.62189e-07	IL10, IRF3, HMGB1, TLR4, TLR3, HSPD1	105	21	16650	45.3061	0.000790036	1.22156e-06	8.06183e-07
GOTERM_BP_FAT	GO:0010638~positive regulation of organelle organization	18	16.8224	1.73007e-07	XBP1, TGFB1, CSF2, SRC, HIF1A, TNF, MMP9, RHOA, INS, ICAM1, VEGFA, IL1A, IL5, IL1B, BCL2, BAX, F2RL1, TP53	105	600	16650	4.75714	0.000842708	1.30102e-06	8.58627e-07
GOTERM_BP_FAT	GO:0002768~immune response-regulating cell surface receptor signaling pathway	15	14.0187	1.84032e-07	JUN, SRC, PRKCD, PIK3CB, RELA, PTK2, NFKB1, CLEC4A, IFNG, CD209, BCL2, BAX, FYN, PLCG1, EZR	105	399	16650	5.96133	0.000896388	1.3818e-06	9.11939e-07
GOTERM_BP_FAT	GO:0036294~cellular response to decreased oxygen levels	10	9.34579	2.1311e-07	AIFM1, SRC, BCL2, PTGS2, HIF1A, TP53, AQP1, ICAM1, NFE2L2, VEGFA	105	139	16650	11.408	0.00103794	1.59767e-06	1.0544e-06
GOTERM_BP_FAT	GO:0022414~reproductive process	27	25.2336	2.17573e-07	APP, CALCA, CSF2, SRC, PTGS2, HIF1A, EGFR, ICAM1, SGPL1, CCL2, CD55, IL10, TGFB1, MMP2, PTPN11, MAPK14, MMP9, PTK2, SOD1, VEGFA, IL1A, IL1B, BCL2, BAX, GHRL, TLR5, TLR3	105	1373	16650	3.1183	0.00105967	1.62863e-06	1.07483e-06
GOTERM_BP_FAT	GO:0032640~tumor necrosis factor production	9	8.41121	2.20742e-07	IL10, IFNG, CCL2, GHRL, HMGB1, TLR4, TLR3, HSPD1, TLR2	105	101	16650	14.1301	0.0010751	1.64476e-06	1.08548e-06
GOTERM_BP_FAT	GO:0051209~release of sequestered calcium ion into cytosol	9	8.41121	2.20742e-07	CXCL10, CXCL11, TGFB1, CXCR3, BAX, PLCG1, CCR5, F2, FGF2	105	101	16650	14.1301	0.0010751	1.64476e-06	1.08548e-06
GOTERM_BP_FAT	GO:0051283~negative regulation of sequestering of calcium ion	9	8.41121	2.20742e-07	CXCL10, CXCL11, TGFB1, CXCR3, BAX, PLCG1, CCR5, F2, FGF2	105	101	16650	14.1301	0.0010751	1.64476e-06	1.08548e-06
GOTERM_BP_FAT	GO:0000003~reproduction	27	25.2336	2.23861e-07	APP, CALCA, CSF2, SRC, PTGS2, HIF1A, EGFR, ICAM1, SGPL1, CCL2, CD55, IL10, TGFB1, MMP2, PTPN11, MAPK14, MMP9, PTK2, SOD1, VEGFA, IL1A, IL1B, BCL2, BAX, GHRL, TLR5, TLR3	105	1375	16650	3.11377	0.00109028	1.66546e-06	1.09914e-06
GOTERM_BP_FAT	GO:0008631~intrinsic apoptotic signaling pathway in response to oxidative stress	7	6.54206	2.24447e-07	PRKCD, BCL2, SOD2, HIF1A, SOD1, NFE2L2, INS	105	42	16650	26.4286	0.00109313	1.66727e-06	1.10034e-06
GOTERM_BP_FAT	GO:0045619~regulation of lymphocyte differentiation	10	9.34579	2.26581e-07	IL6, XBP1, TGFB1, IFNG, IFNB1, IL2RA, IL18, HMGB1, IL2, SOD1	105	140	16650	11.3265	0.00110352	1.68056e-06	1.10911e-06
GOTERM_BP_FAT	GO:0042886~amide transport	13	12.1495	2.4839e-07	NOS2, PTPN11, HIF1A, TNF, EGFR, INS, IL6, IFNG, CD209, IL1B, CCL5, GHRL, GLUL	105	289	16650	7.13297	0.00120967	1.83952e-06	1.21402e-06
GOTERM_BP_FAT	GO:0010212~response to ionizing radiation	10	9.34579	2.88149e-07	CXCL10, TGFB1, CASP3, BCL2, BAX, CCL2, MAPK14, SOD2, TP53, ICAM1	105	144	16650	11.0119	0.00140317	2.13073e-06	1.4062e-06
GOTERM_BP_FAT	GO:0032481~positive regulation of type I interferon production	8	7.47664	2.89829e-07	IRF3, HMGB1, TLR4, RELA, NFKB1, TLR3, HSPD1, TLR2	105	71	16650	17.8672	0.00141134	2.13667e-06	1.41012e-06
GOTERM_BP_FAT	GO:0035690~cellular response to drug	8	7.47664	2.89829e-07	NOS2, IL1B, CCL4, CCL2, TP53, EGFR, TLR3, NFE2L2	105	71	16650	17.8672	0.00141134	2.13667e-06	1.41012e-06
GOTERM_BP_FAT	GO:0032680~regulation of tumor necrosis factor production	9	8.41121	2.98353e-07	IL10, IFNG, CCL2, GHRL, HMGB1, TLR4, TLR3, HSPD1, TLR2	105	105	16650	13.5918	0.00145282	2.18628e-06	1.44286e-06
GOTERM_BP_FAT	GO:1902656~calcium ion import into cytosol	9	8.41121	2.98353e-07	CXCL10, CXCL11, TGFB1, CXCR3, BAX, PLCG1, CCR5, F2, FGF2	105	105	16650	13.5918	0.00145282	2.18628e-06	1.44286e-06
GOTERM_BP_FAT	GO:0051928~positive regulation of calcium ion transport	9	8.41121	2.98353e-07	CXCL10, CXCL11, CCL5, CXCR3, CCL4, BAX, CCL2, PLCG1, F2	105	105	16650	13.5918	0.00145282	2.18628e-06	1.44286e-06
GOTERM_BP_FAT	GO:0097553~calcium ion transmembrane import into cytosol	9	8.41121	2.98353e-07	CXCL10, CXCL11, TGFB1, CXCR3, BAX, PLCG1, CCR5, F2, FGF2	105	105	16650	13.5918	0.00145282	2.18628e-06	1.44286e-06
GOTERM_BP_FAT	GO:0042063~gliogenesis	12	11.215	3.04598e-07	TGFB1, IFNG, CCL2, PTPN11, F2, AGER, FGF2, TLR4, RELA, EGFR, SOD1, TLR2	105	240	16650	7.92857	0.00148321	2.22869e-06	1.47085e-06
GOTERM_BP_FAT	GO:0030072~peptide hormone secretion	12	11.215	3.17525e-07	IL6, IFNG, NOS2, CCL5, IL1B, PTPN11, GHRL, GLUL, HIF1A, TNF, EGFR, INS	105	241	16650	7.89567	0.0015461	2.31979e-06	1.53097e-06
GOTERM_BP_FAT	GO:0032612~interleukin-1 production	8	7.47664	3.19408e-07	IL10, CALCA, IFNG, IL1B, F2RL1, GHRL, HMGB1, TLR4	105	72	16650	17.619	0.00155526	2.33005e-06	1.53775e-06
GOTERM_BP_FAT	GO:0051403~stress-activated MAPK cascade	12	11.215	3.30934e-07	IL1A, IL1B, F2RL1, HMGB1, EZR, MAPK14, AGER, TNF, TLR4, NFKB1, TLR3, VEGFA	105	242	16650	7.86305	0.00161134	2.41053e-06	1.59086e-06
GOTERM_BP_FAT	GO:0034613~cellular protein localization	29	27.1028	3.35507e-07	SRC, PTGS2, TNF, AGER, EGFR, INS, CCL2, FYN, IL10, XBP1, JUN, TGFB1, PRKCD, IL18, PTPN11, MAPK14, F2, RHOA, VEGFA, IL6, IFNG, IL1B, BCL2, BAX, EZR, TP53, TLR4, TLR3, TLR2	105	1600	16650	2.87411	0.00163359	2.44019e-06	1.61043e-06
GOTERM_BP_FAT	GO:0045123~cellular extravasation	7	6.54206	3.43257e-07	IL1A, RIPK3, CCL2, TNF, ELANE, PIK3CG, ICAM1	105	45	16650	24.6667	0.00167129	2.49283e-06	1.64518e-06
GOTERM_BP_FAT	GO:0007610~behavior	17	15.8879	3.45826e-07	APP, JUN, CALCA, CSF2, PTGS2, SOD2, HIF1A, EGFR, INS, SOD1, IL6, CASP3, BCL2, FYN, GHRL, ITGA5, TP53	105	557	16650	4.8397	0.00168379	2.50775e-06	1.65502e-06
GOTERM_BP_FAT	GO:0001503~ossification	14	13.0841	3.65704e-07	CALCA, TGFB1, MMP2, ISG15, PTGS2, FGF2, HIF1A, TNF, MMP9, RHOA, EGFR, PTK2, IL6, BCL2	105	359	16650	6.18384	0.00178049	2.64795e-06	1.74755e-06
GOTERM_BP_FAT	GO:1903555~regulation of tumor necrosis factor superfamily cytokine production	9	8.41121	3.70932e-07	IL10, IFNG, CCL2, GHRL, HMGB1, TLR4, TLR3, HSPD1, TLR2	105	108	16650	13.2143	0.00180592	2.67785e-06	1.76728e-06
GOTERM_BP_FAT	GO:0048525~negative regulation of viral process	9	8.41121	3.70932e-07	IFITM3, JUN, IFNB1, CCL5, IL2RA, CCL4, ISG15, TNF, MBL2	105	108	16650	13.2143	0.00180592	2.67785e-06	1.76728e-06
GOTERM_BP_FAT	GO:0044255~cellular lipid metabolic process	23	21.4953	3.77474e-07	SFTPB, XBP1, TGFB1, SRC, PRKCD, PTPN11, PIK3CB, MIF, PTGS2, MAPK14, FGF2, TNF, EGFR, PIK3CG, PTK2, INS, SGPL1, TTR, NEU1, BAX, FYN, PLCG1, TLR2	105	1043	16650	3.49678	0.00183774	2.72105e-06	1.79579e-06
GOTERM_BP_FAT	GO:0071453~cellular response to oxygen levels	10	9.34579	3.85158e-07	AIFM1, SRC, BCL2, PTGS2, HIF1A, TP53, AQP1, ICAM1, NFE2L2, VEGFA	105	149	16650	10.6424	0.00187511	2.77234e-06	1.82964e-06
GOTERM_BP_FAT	GO:0002708~positive regulation of lymphocyte mediated immunity	8	7.47664	3.86233e-07	IL6, TGFB1, IFNG, IL1B, TNF, B2M, IL2, HSPD1	105	74	16650	17.1429	0.00188034	2.77598e-06	1.83204e-06
GOTERM_BP_FAT	GO:0045927~positive regulation of growth	12	11.215	3.89722e-07	IL9, BCL2, FN1, GHRL, F2, EZR, MAPK14, FGF2, EGFR, IL2, INS, VEGFA	105	246	16650	7.73519	0.00189732	2.79693e-06	1.84587e-06
GOTERM_BP_FAT	GO:0030182~neuron differentiation	25	23.3645	3.91983e-07	APP, HMGB1, HIF1A, AGER, EGFR, AIFM1, CASP3, FYN, B2M, XBP1, JUN, FN1, PTPN11, SOD2, RHOA, IL2, PTK2, SOD1, VEGFA, IL6, IFNG, BCL2, GHRL, EZR, NFE2L2	105	1226	16650	3.23351	0.00190831	2.80902e-06	1.85385e-06
GOTERM_BP_FAT	GO:0070727~cellular macromolecule localization	29	27.1028	3.96087e-07	SRC, PTGS2, TNF, AGER, EGFR, INS, CCL2, FYN, IL10, XBP1, JUN, TGFB1, PRKCD, IL18, PTPN11, MAPK14, F2, RHOA, VEGFA, IL6, IFNG, IL1B, BCL2, BAX, EZR, TP53, TLR4, TLR3, TLR2	105	1613	16650	2.85094	0.00192827	2.83426e-06	1.87051e-06
GOTERM_BP_FAT	GO:0036003~positive regulation of transcription from RNA polymerase II promoter in response to stress	6	5.60748	4.15146e-07	XBP1, HIF1A, TP53, KLF2, NFE2L2, VEGFA	105	25	16650	38.0571	0.00202096	2.96629e-06	1.95764e-06
GOTERM_BP_FAT	GO:0002824~positive regulation of adaptive immune response based on somatic recombination of immune receptors built from immunoglobulin superfamily domains	8	7.47664	4.23824e-07	IL6, TGFB1, IFNG, IL1B, TNF, B2M, IL2, HSPD1	105	75	16650	16.9143	0.00206317	3.02386e-06	1.99564e-06
GOTERM_BP_FAT	GO:0050728~negative regulation of inflammatory response	9	8.41121	4.273e-07	IL10, IL2RA, PRKCD, GHRL, AGER, NFKB1, IL2, ELANE, INS	105	110	16650	12.974	0.00208007	3.03976e-06	2.00613e-06
GOTERM_BP_FAT	GO:0051282~regulation of sequestering of calcium ion	9	8.41121	4.273e-07	CXCL10, CXCL11, TGFB1, CXCR3, BAX, PLCG1, CCR5, F2, FGF2	105	110	16650	12.974	0.00208007	3.03976e-06	2.00613e-06
GOTERM_BP_FAT	GO:0032613~interleukin-10 production	7	6.54206	4.47967e-07	PRKCD, F2RL1, HMGB1, AGER, TLR4, HSPD1, TLR2	105	47	16650	23.617	0.00218056	3.18213e-06	2.10009e-06
GOTERM_BP_FAT	GO:0002790~peptide secretion	12	11.215	4.57564e-07	IL6, IFNG, NOS2, CCL5, IL1B, PTPN11, GHRL, GLUL, HIF1A, TNF, EGFR, INS	105	250	16650	7.61143	0.00222723	3.24016e-06	2.13839e-06
GOTERM_BP_FAT	GO:0009914~hormone transport	13	12.1495	4.57783e-07	NOS2, PTPN11, HIF1A, TNF, EGFR, INS, IL6, TTR, IFNG, IL1B, CCL5, GHRL, GLUL	105	306	16650	6.73669	0.00222829	3.24016e-06	2.13839e-06
GOTERM_BP_FAT	GO:0071706~tumor necrosis factor superfamily cytokine production	9	8.41121	4.58131e-07	IL10, IFNG, CCL2, GHRL, HMGB1, TLR4, TLR3, HSPD1, TLR2	105	111	16650	12.8571	0.00222998	3.24016e-06	2.13839e-06
GOTERM_BP_FAT	GO:0002429~immune response-activating cell surface receptor signaling pathway	14	13.0841	4.69689e-07	SRC, PRKCD, PIK3CB, RELA, PTK2, NFKB1, CLEC4A, IFNG, CD209, BCL2, BAX, FYN, PLCG1, EZR	105	367	16650	6.04905	0.00228618	3.3171e-06	2.18916e-06
GOTERM_BP_FAT	GO:0043281~regulation of cysteine-type endopeptidase activity involved in apoptotic process	11	10.2804	4.89161e-07	IL6, AIFM1, SRC, CASP3, BAX, HMGB1, TNF, MMP9, HSPD1, AQP1, VEGFA	105	200	16650	8.72143	0.00238084	3.44961e-06	2.27662e-06
GOTERM_BP_FAT	GO:0010038~response to metal ion	13	12.1495	4.90639e-07	APP, JUN, PTGS2, SOD2, EGFR, AQP1, ICAM1, SOD1, IL1A, IL6, CASP3, BCL2, B2M	105	308	16650	6.69295	0.00238803	3.4515e-06	2.27786e-06
GOTERM_BP_FAT	GO:0051208~sequestering of calcium ion	9	8.41121	4.90845e-07	CXCL10, CXCL11, TGFB1, CXCR3, BAX, PLCG1, CCR5, F2, FGF2	105	112	16650	12.7423	0.00238903	3.4515e-06	2.27786e-06
GOTERM_BP_FAT	GO:0097194~execution phase of apoptosis	8	7.47664	5.0829e-07	AIFM1, CXCR3, CASP3, PRKCD, BAX, HMGB1, TP53, PTK2	105	77	16650	16.475	0.00247383	3.56902e-06	2.35542e-06
GOTERM_BP_FAT	GO:0042176~regulation of protein catabolic process	14	13.0841	5.15043e-07	IL10, XBP1, NOS2, TNF, EGFR, RELA, PTK2, INS, IFNG, IL1B, FYN, EZR, HSPA1A, NFE2L2	105	370	16650	6	0.00250666	3.61123e-06	2.38328e-06
GOTERM_BP_FAT	GO:0006812~cation transport	22	20.5607	5.19815e-07	CALCA, TGFB1, ACTN4, F2, PTGS2, FGF2, MMP9, PIK3CG, AQP1, ICAM1, CXCL10, CXCL11, CCL5, CXCR3, CCL4, BCL2, BAX, CCL2, FYN, PLCG1, CCR5, B2M	105	975	16650	3.57802	0.00252985	3.63945e-06	2.4019e-06
GOTERM_BP_FAT	GO:0031098~stress-activated protein kinase signaling cascade	12	11.215	5.3564e-07	IL1A, IL1B, F2RL1, HMGB1, EZR, MAPK14, AGER, TNF, TLR4, NFKB1, TLR3, VEGFA	105	254	16650	7.49156	0.00260677	3.7315e-06	2.46266e-06
GOTERM_BP_FAT	GO:0046883~regulation of hormone secretion	12	11.215	5.3564e-07	IL6, IFNG, NOS2, CCL5, IL1B, PTPN11, GHRL, GLUL, HIF1A, TNF, EGFR, INS	105	254	16650	7.49156	0.00260677	3.7315e-06	2.46266e-06
GOTERM_BP_FAT	GO:0009636~response to toxic substance	11	10.2804	5.36026e-07	AIFM1, CCL5, ALB, CCL4, BCL2, BAX, SOD2, PTGS2, TNF, SOD1, TLR2	105	202	16650	8.63508	0.00260865	3.7315e-06	2.46266e-06
GOTERM_BP_FAT	GO:0090276~regulation of peptide hormone secretion	11	10.2804	5.36026e-07	IFNG, NOS2, CCL5, IL1B, PTPN11, GHRL, GLUL, HIF1A, TNF, EGFR, INS	105	202	16650	8.63508	0.00260865	3.7315e-06	2.46266e-06
GOTERM_BP_FAT	GO:0097530~granulocyte migration	9	8.41121	5.62308e-07	IL1A, CXCL8, IFNG, CCL5, IL1B, CCL4, CCL2, PIK3CG, VEGFA	105	114	16650	12.5188	0.00273637	3.90612e-06	2.57789e-06
GOTERM_BP_FAT	GO:0048511~rhythmic process	13	12.1495	5.62711e-07	JUN, CSF2, NOS2, EGFR, ICAM1, SOD1, VEGFA, SGPL1, IL6, BCL2, BAX, GHRL, TP53	105	312	16650	6.60714	0.00273834	3.90612e-06	2.57789e-06
GOTERM_BP_FAT	GO:0070231~T cell apoptotic process	7	6.54206	5.77538e-07	RIPK3, CCL5, IL2RA, BAX, HIF1A, TP53, ICAM1	105	49	16650	22.6531	0.00281039	4.00334e-06	2.64205e-06
GOTERM_BP_FAT	GO:0022612~gland morphogenesis	9	8.41121	6.01255e-07	IL6, XBP1, TGFB1, SRC, BCL2, BAX, EZR, TNF, EGFR	105	115	16650	12.4099	0.00292563	4.16181e-06	2.74664e-06
GOTERM_BP_FAT	GO:0002821~positive regulation of adaptive immune response	8	7.47664	6.06473e-07	IL6, TGFB1, IFNG, IL1B, TNF, B2M, IL2, HSPD1	105	79	16650	16.0579	0.00295098	4.19197e-06	2.76655e-06
GOTERM_BP_FAT	GO:0044089~positive regulation of cellular component biogenesis	15	14.0187	6.15997e-07	JUN, TGFB1, CSF2, SRC, FGF2, TNF, RHOA, ICAM1, VEGFA, IL5, BAX, F2RL1, GHRL, TP53, TLR4	105	441	16650	5.39359	0.00299725	4.25178e-06	2.80602e-06
GOTERM_BP_FAT	GO:0033028~myeloid cell apoptotic process	6	5.60748	6.24581e-07	IL6, IFNG, IRF3, CCL5, BCL2, MIF	105	27	16650	35.2381	0.00303896	4.30493e-06	2.84109e-06
GOTERM_BP_FAT	GO:0051701~interaction with host	10	9.34579	6.32344e-07	IFITM3, TGFB1, CD209, ALB, MRC1, ITGA5, CCR5, CD55, ICAM1, HSPA1A	105	158	16650	10.0362	0.00307667	4.35228e-06	2.87234e-06
GOTERM_BP_FAT	GO:0072676~lymphocyte migration	8	7.47664	6.61246e-07	CXCL10, CXCL11, RIPK3, CCL5, CXCR3, CCL4, CCL2, PIK3CG	105	80	16650	15.8571	0.00321707	4.54478e-06	2.99939e-06
GOTERM_BP_FAT	GO:0002221~pattern recognition receptor signaling pathway	10	9.34579	6.66841e-07	IRF3, F2RL1, HMGB1, TLR5, TLR4, RELA, TLR3, HSPD1, HSPA1A, TLR2	105	159	16650	9.97305	0.00324425	4.57035e-06	3.01626e-06
GOTERM_BP_FAT	GO:0031669~cellular response to nutrient levels	10	9.34579	6.66841e-07	IL6, XBP1, JUN, AIFM1, ALB, BCL2, GLUL, TP53, ICAM1, NFE2L2	105	159	16650	9.97305	0.00324425	4.57035e-06	3.01626e-06
GOTERM_BP_FAT	GO:0002791~regulation of peptide secretion	11	10.2804	6.70794e-07	IFNG, NOS2, CCL5, IL1B, PTPN11, GHRL, GLUL, HIF1A, TNF, EGFR, INS	105	207	16650	8.4265	0.00326345	4.59098e-06	3.02988e-06
GOTERM_BP_FAT	GO:0006811~ion transport	27	25.2336	6.95748e-07	CALCA, AQP5, PTGS2, FGF2, PIK3CG, AQP1, ICAM1, CCL5, CXCR3, CCL4, CCL2, FYN, PLCG1, CCR5, B2M, TGFB1, NOS2, ACTN4, MIF, F2, MMP9, CXCL10, CXCL11, IL1B, ALB, BCL2, BAX	105	1458	16650	2.93651	0.00338464	4.75509e-06	3.13818e-06
GOTERM_BP_FAT	GO:0090087~regulation of peptide transport	11	10.2804	7.3249e-07	IFNG, NOS2, CCL5, IL1B, PTPN11, GHRL, GLUL, HIF1A, TNF, EGFR, INS	105	209	16650	8.34586	0.00356306	4.99919e-06	3.29928e-06
GOTERM_BP_FAT	GO:0001910~regulation of leukocyte mediated cytotoxicity	7	6.54206	7.36329e-07	RIPK3, NOS2, F2RL1, CCL2, AGER, B2M, ICAM1	105	51	16650	21.7647	0.0035817	5.01836e-06	3.31194e-06
GOTERM_BP_FAT	GO:0070509~calcium ion import	10	9.34579	7.40755e-07	CXCL10, CXCL11, TGFB1, CXCR3, BAX, CCL2, PLCG1, CCR5, F2, FGF2	105	161	16650	9.84916	0.00360319	5.03445e-06	3.32255e-06
GOTERM_BP_FAT	GO:0030168~platelet activation	10	9.34579	7.40755e-07	IL6, SRC, PRKCD, PTPN11, FYN, PIK3CB, F2, TLR4, RHOA, PIK3CG	105	161	16650	9.84916	0.00360319	5.03445e-06	3.32255e-06
GOTERM_BP_FAT	GO:0051252~regulation of RNA metabolic process	47	43.9252	7.68416e-07	IFITM3, APP, CALCA, CXCL8, SRC, HMGB1, FGF2, HIF1A, TNF, AGER, RELA, EGFR, INS, ICAM1, CCL5, CXCR3, CCL4, ELANE, IL10, XBP1, JUN, TGFB1, RIPK3, IFNB1, IL18, ACTN4, MAPK14, SOD2, IL2, NFKB1, KLF2, VEGFA, IL1A, CXCL10, IL6, IL5, IFNG, IRF3, IL1B, F2RL1, EZR, TP53, TLR4, TLR3, HSPA1A, NFE2L2, TLR2	105	3762	16650	1.98109	0.00373749	5.21517e-06	3.44182e-06
GOTERM_BP_FAT	GO:2001141~regulation of RNA biosynthetic process	46	42.9907	8.36506e-07	IFITM3, APP, CALCA, SRC, HMGB1, FGF2, HIF1A, TNF, AGER, RELA, EGFR, INS, ICAM1, CCL5, CXCR3, CCL4, ELANE, IL10, XBP1, JUN, TGFB1, RIPK3, IFNB1, IL18, ACTN4, MAPK14, SOD2, IL2, NFKB1, KLF2, VEGFA, IL1A, CXCL10, IL6, IL5, IFNG, IRF3, IL1B, F2RL1, EZR, TP53, TLR4, TLR3, HSPA1A, NFE2L2, TLR2	105	3644	16650	2.00172	0.004068	5.66939e-06	3.74159e-06
GOTERM_BP_FAT	GO:0071214~cellular response to abiotic stimulus	12	11.215	9.09665e-07	TGFB1, IL1B, BAX, MAPK14, TLR5, PTGS2, TP53, TLR4, EGFR, NFKB1, TLR3, AQP1	105	268	16650	7.10021	0.00442299	6.14837e-06	4.0577e-06
GOTERM_BP_FAT	GO:0071549~cellular response to dexamethasone stimulus	6	5.60748	9.09702e-07	IL6, TGFB1, IFNB1, CCL2, EGFR, AQP1	105	29	16650	32.8079	0.00442317	6.14837e-06	4.0577e-06
GOTERM_BP_FAT	GO:0044706~multi-multicellular organism process	11	10.2804	9.48365e-07	CALCA, TGFB1, IL1B, MMP2, BCL2, CCL2, GHRL, PTGS2, MMP9, CD55, SOD1	105	215	16650	8.11296	0.00461072	6.40081e-06	4.2243e-06
GOTERM_BP_FAT	GO:0051883~killing of cells in other organism involved in symbiotic interaction	5	4.6729	9.83511e-07	ALB, F2RL1, CAMP, ELANE, MBL2	105	13	16650	60.989	0.00478118	6.61055e-06	4.36272e-06
GOTERM_BP_FAT	GO:0001878~response to yeast	5	4.6729	9.83511e-07	APP, IL6, CALCA, CAMP, ELANE	105	13	16650	60.989	0.00478118	6.61055e-06	4.36272e-06
GOTERM_BP_FAT	GO:0051818~disruption of cells of other organism involved in symbiotic interaction	5	4.6729	9.83511e-07	ALB, F2RL1, CAMP, ELANE, MBL2	105	13	16650	60.989	0.00478118	6.61055e-06	4.36272e-06
GOTERM_BP_FAT	GO:0051238~sequestering of metal ion	9	8.41121	1.00477e-06	CXCL10, CXCL11, TGFB1, CXCR3, BAX, PLCG1, CCR5, F2, FGF2	105	123	16650	11.6028	0.00488426	6.74411e-06	4.45087e-06
GOTERM_BP_FAT	GO:0090280~positive regulation of calcium ion import	7	6.54206	1.04009e-06	CXCL10, CXCL11, CXCR3, BAX, CCL2, PLCG1, F2	105	54	16650	20.5556	0.00505556	6.97164e-06	4.60102e-06
GOTERM_BP_FAT	GO:0019637~organophosphate metabolic process	23	21.4953	1.04711e-06	XBP1, CALCA, TGFB1, NOS2, SRC, PRKCD, PTPN11, PIK3CB, FGF2, HIF1A, EGFR, PIK3CG, PTK2, AQP1, INS, VEGFA, CXCL10, CXCL11, IFNG, CXCR3, FYN, PLCG1, HSPA1A	105	1108	16650	3.29165	0.00508958	7.00903e-06	4.6257e-06
GOTERM_BP_FAT	GO:0052547~regulation of peptidase activity	14	13.0841	1.10497e-06	APP, SRC, FN1, HMGB1, TNF, MMP9, KNG1, HSPD1, AQP1, VEGFA, IL6, AIFM1, CASP3, BAX	105	396	16650	5.60606	0.00537005	7.38617e-06	4.8746e-06
GOTERM_BP_FAT	GO:0009896~positive regulation of catabolic process	13	12.1495	1.11871e-06	XBP1, PRKCD, HMGB1, HIF1A, TNF, PTK2, INS, IFNG, IL1B, BAX, EZR, HSPA1A, NFE2L2	105	333	16650	6.19048	0.00543665	7.46778e-06	4.92846e-06
GOTERM_BP_FAT	GO:0007162~negative regulation of cell adhesion	11	10.2804	1.12146e-06	IL10, TGFB1, IFNB1, SRC, IL2RA, PRKCD, PTPN11, ACTN4, HMGB1, PTK2, KNG1	105	219	16650	7.96477	0.00544997	7.47589e-06	4.93381e-06
GOTERM_BP_FAT	GO:0030198~extracellular matrix organization	13	12.1495	1.15444e-06	APP, TGFB1, RIPK3, MMP2, FN1, FGF2, TNF, MMP9, PTK2, ICAM1, TTR, ITGA5, ELANE	105	334	16650	6.17194	0.00560979	7.68522e-06	5.07196e-06
GOTERM_BP_FAT	GO:0009408~response to heat	8	7.47664	1.17366e-06	IL1A, CXCL10, IL6, CALCA, CCL2, HSPD1, HSPA1A, SOD1	105	87	16650	14.5813	0.00570291	7.80249e-06	5.14936e-06
GOTERM_BP_FAT	GO:0051960~regulation of nervous system development	19	17.757	1.18404e-06	APP, TGFB1, FN1, F2, FGF2, HIF1A, RHOA, IL2, RELA, PTK2, VEGFA, IL6, IFNG, BCL2, FYN, GHRL, B2M, NFE2L2, TLR2	105	769	16650	3.91789	0.00575321	7.86079e-06	5.18783e-06
GOTERM_BP_FAT	GO:0043062~extracellular structure organization	13	12.1495	1.19118e-06	APP, TGFB1, RIPK3, MMP2, FN1, FGF2, TNF, MMP9, PTK2, ICAM1, TTR, ITGA5, ELANE	105	335	16650	6.15352	0.00578779	7.89741e-06	5.212e-06
GOTERM_BP_FAT	GO:1903531~negative regulation of secretion by cell	10	9.34579	1.22665e-06	IL10, IL6, IL1B, FN1, F2RL1, PTPN11, GHRL, EZR, TNF, INS	105	171	16650	9.27318	0.00595966	8.12158e-06	5.35995e-06
GOTERM_BP_FAT	GO:1903670~regulation of sprouting angiogenesis	6	5.60748	1.28873e-06	HMGB1, ITGA5, PTGS2, FGF2, RHOA, VEGFA	105	31	16650	30.6912	0.00626032	8.52102e-06	5.62356e-06
GOTERM_BP_FAT	GO:0048247~lymphocyte chemotaxis	7	6.54206	1.29442e-06	CXCL10, CXCL11, CCL5, CXCR3, CCL4, CCL2, PIK3CG	105	56	16650	19.8214	0.00628785	8.53545e-06	5.63308e-06
GOTERM_BP_FAT	GO:0033619~membrane protein proteolysis	7	6.54206	1.29442e-06	IL10, TGFB1, IFNG, IL1B, TNF, RELA, NFKB1	105	56	16650	19.8214	0.00628785	8.53545e-06	5.63308e-06
GOTERM_BP_FAT	GO:0046890~regulation of lipid biosynthetic process	9	8.41121	1.35951e-06	XBP1, IFNG, IL1B, PRKCD, PTGS2, TNF, NFKB1, SOD1, INS	105	128	16650	11.1496	0.00660301	8.95256e-06	5.90836e-06
GOTERM_BP_FAT	GO:0051341~regulation of oxidoreductase activity	8	7.47664	1.36989e-06	IFNG, RIPK3, IL1B, HIF1A, TNF, EGFR, NFKB1, INS	105	89	16650	14.2536	0.00665324	8.98722e-06	5.93123e-06
GOTERM_BP_FAT	GO:0002286~T cell activation involved in immune response	8	7.47664	1.36989e-06	IL6, IFNG, IFNA1, IFNB1, IL18, F2RL1, HMGB1, ICAM1	105	89	16650	14.2536	0.00665324	8.98722e-06	5.93123e-06
GOTERM_BP_FAT	GO:1903672~positive regulation of sprouting angiogenesis	5	4.6729	1.37031e-06	HMGB1, ITGA5, PTGS2, FGF2, VEGFA	105	14	16650	56.6327	0.00665526	8.98722e-06	5.93123e-06
GOTERM_BP_FAT	GO:2000116~regulation of cysteine-type endopeptidase activity	11	10.2804	1.37618e-06	IL6, AIFM1, SRC, CASP3, BAX, HMGB1, TNF, MMP9, HSPD1, AQP1, VEGFA	105	224	16650	7.78699	0.00668369	9.01361e-06	5.94865e-06
GOTERM_BP_FAT	GO:0010876~lipid localization	13	12.1495	1.4787e-06	CRP, ABCB1, NOS2, SIGMAR1, PRKCD, PTPN11, MIF, TNF, NFKB1, IL6, IL1B, ALB, GHRL	105	342	16650	6.02757	0.0071798	9.67207e-06	6.38321e-06
GOTERM_BP_FAT	GO:0006605~protein targeting	18	16.8224	1.50843e-06	IL10, XBP1, JUN, TGFB1, PRKCD, IL18, PTGS2, MAPK14, TNF, RHOA, EGFR, IL6, IFNG, IL1B, CCL2, TLR4, TLR3, TLR2	105	701	16650	4.07173	0.00732365	9.85334e-06	6.50284e-06
GOTERM_BP_FAT	GO:1901215~negative regulation of neuron death	10	9.34579	1.5591e-06	IL6, JUN, BCL2, BAX, CCL2, FYN, SOD2, HIF1A, HSPD1, SOD1	105	176	16650	9.00974	0.00756872	1.01707e-05	6.71228e-06
GOTERM_BP_FAT	GO:0071384~cellular response to corticosteroid stimulus	7	6.54206	1.59743e-06	IL6, TGFB1, AIFM1, IFNB1, CCL2, EGFR, AQP1	105	58	16650	19.1379	0.00775406	1.04068e-05	6.86809e-06
GOTERM_BP_FAT	GO:0071456~cellular response to hypoxia	9	8.41121	1.71544e-06	SRC, BCL2, PTGS2, HIF1A, TP53, AQP1, ICAM1, NFE2L2, VEGFA	105	132	16650	10.8117	0.00832448	1.11606e-05	7.36561e-06
GOTERM_BP_FAT	GO:0032768~regulation of monooxygenase activity	7	6.54206	1.76932e-06	IFNG, IL1B, HIF1A, TNF, EGFR, NFKB1, INS	105	59	16650	18.8136	0.00858485	1.14653e-05	7.56668e-06
GOTERM_BP_FAT	GO:0032760~positive regulation of tumor necrosis factor production	7	6.54206	1.76932e-06	IFNG, CCL2, HMGB1, TLR4, TLR3, HSPD1, TLR2	105	59	16650	18.8136	0.00858485	1.14653e-05	7.56668e-06
GOTERM_BP_FAT	GO:0002312~B cell activation involved in immune response	7	6.54206	1.76932e-06	XBP1, TGFB1, IFNG, IFNB1, TLR4, IL2, HSPD1	105	59	16650	18.8136	0.00858485	1.14653e-05	7.56668e-06
GOTERM_BP_FAT	GO:0048666~neuron development	21	19.6262	1.84399e-06	APP, XBP1, JUN, FN1, PTPN11, HMGB1, SOD2, AGER, RHOA, EGFR, IL2, PTK2, SOD1, VEGFA, IL6, BCL2, FYN, GHRL, EZR, B2M, NFE2L2	105	965	16650	3.45078	0.00894554	1.19333e-05	7.87555e-06
GOTERM_BP_FAT	GO:0002260~lymphocyte homeostasis	7	6.54206	1.95602e-06	TGFB1, RIPK3, IL2RA, BCL2, BAX, MIF, HIF1A	105	60	16650	18.5	0.00948642	1.26415e-05	8.34293e-06
GOTERM_BP_FAT	GO:0010001~glial cell differentiation	10	9.34579	1.96662e-06	TGFB1, PTPN11, F2, AGER, FGF2, TLR4, RELA, EGFR, SOD1, TLR2	105	181	16650	8.76085	0.00953758	1.26932e-05	8.37703e-06
GOTERM_BP_FAT	GO:1990266~neutrophil migration	8	7.47664	1.98382e-06	IL1A, CXCL8, IFNG, CCL5, IL1B, CCL4, CCL2, PIK3CG	105	94	16650	13.4954	0.00962056	1.27872e-05	8.43909e-06
GOTERM_BP_FAT	GO:0060249~anatomical structure homeostasis	13	12.1495	1.99587e-06	CALCA, SRC, PTPN11, HIF1A, EGFR, SOD1, VEGFA, IL6, ALB, BCL2, BAX, B2M, TLR4	105	352	16650	5.85633	0.00967876	1.28479e-05	8.47917e-06
GOTERM_BP_FAT	GO:0030278~regulation of ossification	10	9.34579	2.0583e-06	IL6, CALCA, TGFB1, BCL2, ISG15, MAPK14, HIF1A, TNF, FGF2, PTK2	105	182	16650	8.71272	0.00998	1.32323e-05	8.73286e-06
GOTERM_BP_FAT	GO:0006461~protein complex assembly	26	24.2991	2.09342e-06	CSF2, SRC, HMGB1, FGF2, TNF, HSPD1, INS, ICAM1, AIFM1, CCL5, GLUL, JUN, TGFB1, RIPK3, PRKCD, SIGMAR1, FN1, MIF, SOD2, PTK2, VEGFA, IL5, BAX, CRYAA, TP53, TLR4	105	1445	16650	2.85319	0.0101494	1.34404e-05	8.87014e-06
GOTERM_BP_FAT	GO:0070271~protein complex biogenesis	26	24.2991	2.1198e-06	CSF2, SRC, HMGB1, FGF2, TNF, HSPD1, INS, ICAM1, AIFM1, CCL5, GLUL, JUN, TGFB1, RIPK3, PRKCD, SIGMAR1, FN1, MIF, SOD2, PTK2, VEGFA, IL5, BAX, CRYAA, TP53, TLR4	105	1446	16650	2.85122	0.0102766	1.35918e-05	8.9701e-06
GOTERM_BP_FAT	GO:1903557~positive regulation of tumor necrosis factor superfamily cytokine production	7	6.54206	2.15849e-06	IFNG, CCL2, HMGB1, TLR4, TLR3, HSPD1, TLR2	105	61	16650	18.1967	0.0104632	1.37855e-05	9.09791e-06
GOTERM_BP_FAT	GO:0046889~positive regulation of lipid biosynthetic process	7	6.54206	2.15849e-06	XBP1, IFNG, IL1B, PRKCD, PTGS2, TNF, INS	105	61	16650	18.1967	0.0104632	1.37855e-05	9.09791e-06
GOTERM_BP_FAT	GO:0002548~monocyte chemotaxis	7	6.54206	2.15849e-06	CXCL10, IL6, CALCA, CCL5, CCL4, CCL2, HMGB1	105	61	16650	18.1967	0.0104632	1.37855e-05	9.09791e-06
GOTERM_BP_FAT	GO:0046879~hormone secretion	12	11.215	2.31915e-06	IL6, IFNG, NOS2, CCL5, IL1B, PTPN11, GHRL, GLUL, HIF1A, TNF, EGFR, INS	105	295	16650	6.45036	0.0112376	1.47922e-05	9.76231e-06
GOTERM_BP_FAT	GO:0002248~connective tissue replacement involved in inflammatory response wound healing	4	3.73832	2.34609e-06	IL1A, TGFB1, AGER, HIF1A	105	5	16650	126.857	0.0113674	1.49445e-05	9.86279e-06
GOTERM_BP_FAT	GO:0043524~negative regulation of neuron apoptotic process	9	8.41121	2.39665e-06	JUN, BCL2, BAX, CCL2, FYN, SOD2, HIF1A, HSPD1, SOD1	105	138	16650	10.3416	0.011611	1.52466e-05	1.00622e-05
GOTERM_BP_FAT	GO:0002639~positive regulation of immunoglobulin production	6	5.60748	2.41392e-06	IL6, XBP1, TGFB1, IL5, IFNG, IL2	105	35	16650	27.1837	0.0116941	1.53164e-05	1.01083e-05
GOTERM_BP_FAT	GO:0097300~programmed necrotic cell death	6	5.60748	2.41392e-06	RIPK3, IRF3, BAX, TNF, TLR4, TLR3	105	35	16650	27.1837	0.0116941	1.53164e-05	1.01083e-05
GOTERM_BP_FAT	GO:0032874~positive regulation of stress-activated MAPK cascade	9	8.41121	2.53e-06	IL1A, IL1B, F2RL1, HMGB1, AGER, TNF, TLR4, TLR3, VEGFA	105	139	16650	10.2672	0.012253	1.60321e-05	1.05806e-05
GOTERM_BP_FAT	GO:0045926~negative regulation of growth	11	10.2804	2.56125e-06	IL10, TGFB1, IFNG, BCL2, HIF1A, TNF, TP53, PTK2, CAMP, ELANE, MBL2	105	240	16650	7.26786	0.0124034	1.6209e-05	1.06974e-05
GOTERM_BP_FAT	GO:0007565~female pregnancy	10	9.34579	2.57413e-06	CALCA, TGFB1, IL1B, MMP2, BCL2, CCL2, GHRL, PTGS2, MMP9, SOD1	105	187	16650	8.47976	0.0124654	1.62694e-05	1.07372e-05
GOTERM_BP_FAT	GO:0070304~positive regulation of stress-activated protein kinase signaling cascade	9	8.41121	2.6696e-06	IL1A, IL1B, F2RL1, HMGB1, AGER, TNF, TLR4, TLR3, VEGFA	105	140	16650	10.1939	0.0129247	1.6851e-05	1.1121e-05
GOTERM_BP_FAT	GO:0031668~cellular response to extracellular stimulus	10	9.34579	2.68967e-06	IL6, XBP1, JUN, AIFM1, ALB, BCL2, GLUL, TP53, ICAM1, NFE2L2	105	188	16650	8.43465	0.0130213	1.69557e-05	1.11901e-05
GOTERM_BP_FAT	GO:0051098~regulation of binding	12	11.215	2.72773e-06	IL10, APP, JUN, TGFB1, SRC, PRKCD, BCL2, BAX, HMGB1, AGER, B2M, MMP9	105	300	16650	6.34286	0.0132043	1.71734e-05	1.13338e-05
GOTERM_BP_FAT	GO:0071548~response to dexamethasone	6	5.60748	2.78941e-06	IL6, TGFB1, IFNB1, CCL2, EGFR, AQP1	105	36	16650	26.4286	0.0135008	1.75391e-05	1.15751e-05
GOTERM_BP_FAT	GO:0031400~negative regulation of protein modification process	16	14.9533	2.93812e-06	XBP1, JUN, TGFB1, PRKCD, ISG15, TNF, IL2, PTPA, IL6, IL1B, BAX, F2RL1, FYN, EZR, TLR4, HSPA1A	105	578	16650	4.38952	0.0142155	1.84503e-05	1.21765e-05
GOTERM_BP_FAT	GO:0032868~response to insulin	11	10.2804	2.96926e-06	IL10, IL6, XBP1, SRC, IL1B, PRKCD, CCL2, PTPN11, RELA, TLR2, INS	105	244	16650	7.14871	0.0143651	1.86219e-05	1.22898e-05
GOTERM_BP_FAT	GO:0048638~regulation of developmental growth	12	11.215	3.00209e-06	APP, SGPL1, BCL2, FN1, PTPN11, GHRL, EZR, MAPK14, FGF2, PTK2, SOD1, VEGFA	105	303	16650	6.28006	0.0145227	1.88036e-05	1.24097e-05
GOTERM_BP_FAT	GO:0009895~negative regulation of catabolic process	9	8.41121	3.12835e-06	IL10, NOS2, IL1B, FYN, TNF, RELA, EGFR, PIK3CG, INS	105	143	16650	9.98002	0.0151289	1.95692e-05	1.2915e-05
GOTERM_BP_FAT	GO:0032729~positive regulation of interferon-gamma production	7	6.54206	3.14682e-06	IL1B, IL18, TNF, TLR4, IL2, TLR3, HSPD1	105	65	16650	17.0769	0.0152175	1.96093e-05	1.29414e-05
GOTERM_BP_FAT	GO:0043618~regulation of transcription from RNA polymerase II promoter in response to stress	7	6.54206	3.14682e-06	XBP1, JUN, HIF1A, TP53, KLF2, NFE2L2, VEGFA	105	65	16650	17.0769	0.0152175	1.96093e-05	1.29414e-05
GOTERM_BP_FAT	GO:0014068~positive regulation of phosphatidylinositol 3-kinase signaling	7	6.54206	3.14682e-06	CCL5, IL18, F2RL1, FYN, F2, PTK2, INS	105	65	16650	17.0769	0.0152175	1.96093e-05	1.29414e-05
GOTERM_BP_FAT	GO:0032727~positive regulation of interferon-alpha production	5	4.6729	3.2114e-06	IRF3, HMGB1, TLR4, TLR3, HSPD1	105	17	16650	46.6387	0.0155274	1.99352e-05	1.31565e-05
GOTERM_BP_FAT	GO:0051023~regulation of immunoglobulin secretion	5	4.6729	3.2114e-06	IL6, XBP1, IL5, TNF, IL2	105	17	16650	46.6387	0.0155274	1.99352e-05	1.31565e-05
GOTERM_BP_FAT	GO:2000778~positive regulation of interleukin-6 secretion	5	4.6729	3.2114e-06	XBP1, IL1B, F2RL1, HMGB1, HSPD1	105	17	16650	46.6387	0.0155274	1.99352e-05	1.31565e-05
GOTERM_BP_FAT	GO:0051048~negative regulation of secretion	10	9.34579	3.33683e-06	IL10, IL6, IL1B, FN1, F2RL1, PTPN11, GHRL, EZR, TNF, INS	105	193	16650	8.21614	0.0161289	2.06612e-05	1.36356e-05
GOTERM_BP_FAT	GO:0051224~negative regulation of protein transport	10	9.34579	3.33683e-06	IL10, IL6, IL1B, FN1, F2RL1, PTPN11, GHRL, EZR, TNF, INS	105	193	16650	8.21614	0.0161289	2.06612e-05	1.36356e-05
GOTERM_BP_FAT	GO:0090279~regulation of calcium ion import	8	7.47664	3.43605e-06	CXCL10, CXCL11, TGFB1, CXCR3, BAX, CCL2, PLCG1, F2	105	102	16650	12.437	0.0166045	2.12486e-05	1.40233e-05
GOTERM_BP_FAT	GO:0001890~placenta development	9	8.41121	3.47e-06	IL10, CSF2, GHRL, MAPK14, PTGS2, HIF1A, PTK2, EGFR, SOD1	105	145	16650	9.84236	0.0167672	2.14042e-05	1.4126e-05
GOTERM_BP_FAT	GO:0008360~regulation of cell shape	9	8.41121	3.47e-06	IL6, FN1, CCL2, FYN, F2, EZR, PTK2, ICAM1, VEGFA	105	145	16650	9.84236	0.0167672	2.14042e-05	1.4126e-05
GOTERM_BP_FAT	GO:0052548~regulation of endopeptidase activity	13	12.1495	3.53053e-06	APP, SRC, HMGB1, TNF, MMP9, KNG1, HSPD1, AQP1, VEGFA, IL6, AIFM1, CASP3, BAX	105	372	16650	5.54147	0.0170571	2.175e-05	1.43542e-05
GOTERM_BP_FAT	GO:0009266~response to temperature stimulus	9	8.41121	3.65238e-06	IL1A, CXCL10, IL6, CALCA, CCL2, SOD2, HSPD1, HSPA1A, SOD1	105	146	16650	9.77495	0.0176406	2.24439e-05	1.48122e-05
GOTERM_BP_FAT	GO:0000187~activation of MAPK activity	9	8.41121	3.65238e-06	IL1B, PTPN11, GHRL, PIK3CB, MAPK14, TNF, FGF2, TLR4, SOD1	105	146	16650	9.77495	0.0176406	2.24439e-05	1.48122e-05
GOTERM_BP_FAT	GO:0071621~granulocyte chemotaxis	8	7.47664	3.66786e-06	CXCL8, IFNG, CCL5, IL1B, CCL4, CCL2, PIK3CG, VEGFA	105	103	16650	12.3162	0.0177147	2.25107e-05	1.48562e-05
GOTERM_BP_FAT	GO:0051281~positive regulation of release of sequestered calcium ion into cytosol	6	5.60748	3.67731e-06	CXCL10, CXCL11, CXCR3, BAX, PLCG1, F2	105	38	16650	25.0376	0.01776	2.25403e-05	1.48758e-05
GOTERM_BP_FAT	GO:0050764~regulation of phagocytosis	7	6.54206	3.76382e-06	TGFB1, IL1B, F2RL1, CCL2, HMGB1, TNF, MBL2	105	67	16650	16.5672	0.018174	2.30416e-05	1.52066e-05
GOTERM_BP_FAT	GO:0009057~macromolecule catabolic process	23	21.4953	3.94302e-06	IL10, XBP1, TGFB1, NOS2, ISG15, HMGB1, FGF2, TNF, EGFR, RELA, PTK2, INS, IFNG, AIFM1, IL1B, CASP3, BAX, FYN, EZR, TP53, ELANE, HSPA1A, NFE2L2	105	1201	16650	3.03676	0.0190309	2.41083e-05	1.59106e-05
GOTERM_BP_FAT	GO:0010595~positive regulation of endothelial cell migration	7	6.54206	4.1073e-06	TGFB1, PLCG1, MAPK14, PTGS2, FGF2, NFE2L2, VEGFA	105	68	16650	16.3235	0.019816	2.50298e-05	1.65187e-05
GOTERM_BP_FAT	GO:0071498~cellular response to fluid shear stress	5	4.6729	4.10914e-06	XBP1, SRC, PTGS2, KLF2, NFE2L2	105	18	16650	44.0476	0.0198247	2.50298e-05	1.65187e-05
GOTERM_BP_FAT	GO:0010818~T cell chemotaxis	5	4.6729	4.10914e-06	CXCL10, CXCL11, CCL5, CXCR3, PIK3CG	105	18	16650	44.0476	0.0198247	2.50298e-05	1.65187e-05
GOTERM_BP_FAT	GO:0050832~defense response to fungus	6	5.60748	4.19725e-06	APP, CALCA, TGFB1, DEFA1, CAMP, ELANE	105	39	16650	24.3956	0.0202455	2.55027e-05	1.68309e-05
GOTERM_BP_FAT	GO:0046006~regulation of activated T cell proliferation	6	5.60748	4.19725e-06	RIPK3, IL2RA, IL18, HMGB1, AGER, IL2	105	39	16650	24.3956	0.0202455	2.55027e-05	1.68309e-05
GOTERM_BP_FAT	GO:0051962~positive regulation of nervous system development	14	13.0841	4.4094e-06	FN1, FGF2, HIF1A, RHOA, IL2, RELA, VEGFA, IL6, IFNG, BCL2, FYN, GHRL, NFE2L2, TLR2	105	449	16650	4.94432	0.0212578	2.67251e-05	1.76376e-05
GOTERM_BP_FAT	GO:0060627~regulation of vesicle-mediated transport	14	13.0841	4.4094e-06	TGFB1, SRC, HMGB1, PIK3CB, ACTN4, TNF, VEGFA, IFNG, IL1B, F2RL1, CCL2, EZR, B2M, MBL2	105	449	16650	4.94432	0.0212578	2.67251e-05	1.76376e-05
GOTERM_BP_FAT	GO:0019079~viral genome replication	8	7.47664	4.44291e-06	IFITM3, CXCL8, IFNB1, CD209, CCL5, CCL2, ISG15, TNF	105	106	16650	11.9677	0.0214177	2.68948e-05	1.77496e-05
GOTERM_BP_FAT	GO:0032872~regulation of stress-activated MAPK cascade	10	9.34579	4.46535e-06	IL1A, IL1B, F2RL1, HMGB1, EZR, AGER, TNF, TLR4, TLR3, VEGFA	105	200	16650	7.92857	0.0215247	2.69936e-05	1.78148e-05
GOTERM_BP_FAT	GO:0036473~cell death in response to oxidative stress	7	6.54206	4.47585e-06	PRKCD, BCL2, SOD2, HIF1A, SOD1, NFE2L2, INS	105	69	16650	16.087	0.0215747	2.69936e-05	1.78148e-05
GOTERM_BP_FAT	GO:0045582~positive regulation of T cell differentiation	7	6.54206	4.47585e-06	IL6, XBP1, TGFB1, IFNG, IL2RA, IL18, IL2	105	69	16650	16.087	0.0215747	2.69936e-05	1.78148e-05
GOTERM_BP_FAT	GO:0070302~regulation of stress-activated protein kinase signaling cascade	10	9.34579	4.65066e-06	IL1A, IL1B, F2RL1, HMGB1, EZR, AGER, TNF, TLR4, TLR3, VEGFA	105	201	16650	7.88913	0.0224079	2.80132e-05	1.84877e-05
GOTERM_BP_FAT	GO:0002246~wound healing involved in inflammatory response	4	3.73832	4.67085e-06	IL1A, TGFB1, AGER, HIF1A	105	6	16650	105.714	0.022504	2.80308e-05	1.84993e-05
GOTERM_BP_FAT	GO:0097709~connective tissue replacement	4	3.73832	4.67085e-06	IL1A, TGFB1, AGER, HIF1A	105	6	16650	105.714	0.022504	2.80308e-05	1.84993e-05
GOTERM_BP_FAT	GO:0090594~inflammatory response to wounding	4	3.73832	4.67085e-06	IL1A, TGFB1, AGER, HIF1A	105	6	16650	105.714	0.022504	2.80308e-05	1.84993e-05
GOTERM_BP_FAT	GO:0022607~cellular component assembly	36	33.6449	4.69524e-06	APP, CSF2, SRC, HMGB1, FGF2, TNF, HSPD1, INS, ICAM1, AIFM1, CCL5, GLUL, JUN, TGFB1, RIPK3, PRKCD, SIGMAR1, FN1, ACTN4, MIF, SOD2, RHOA, PTK2, VEGFA, IL5, BCL2, BAX, F2RL1, GHRL, ITGA5, CRYAA, EZR, TP53, TLR4, HSPA1A, TLR2	105	2618	16650	2.18051	0.0226202	2.81425e-05	1.8573e-05
GOTERM_BP_FAT	GO:0002576~platelet degranulation	8	7.47664	4.72975e-06	APP, TGFB1, ALB, FN1, ACTN4, KNG1, SOD1, VEGFA	105	107	16650	11.8558	0.0227845	2.83146e-05	1.86866e-05
GOTERM_BP_FAT	GO:2000514~regulation of CD4-positive, alpha-beta T cell activation	6	5.60748	4.77316e-06	IL6, IFNG, IL18, HMGB1, AGER, CD55	105	40	16650	23.7857	0.0229912	2.85394e-05	1.88349e-05
GOTERM_BP_FAT	GO:0050767~regulation of neurogenesis	17	15.8879	4.85576e-06	APP, TGFB1, FN1, F2, HIF1A, RHOA, IL2, RELA, PTK2, VEGFA, IL6, IFNG, BCL2, FYN, B2M, NFE2L2, TLR2	105	682	16650	3.95266	0.0233844	2.89977e-05	1.91374e-05
GOTERM_BP_FAT	GO:0040014~regulation of multicellular organism growth	7	6.54206	4.87085e-06	APP, SGPL1, BCL2, PTPN11, GHRL, EZR, SOD1	105	70	16650	15.8571	0.0234562	2.90167e-05	1.91499e-05
GOTERM_BP_FAT	GO:0043620~regulation of DNA-templated transcription in response to stress	7	6.54206	4.87085e-06	XBP1, JUN, HIF1A, TP53, KLF2, NFE2L2, VEGFA	105	70	16650	15.8571	0.0234562	2.90167e-05	1.91499e-05
GOTERM_BP_FAT	GO:1904950~negative regulation of establishment of protein localization	10	9.34579	5.24676e-06	IL10, IL6, IL1B, FN1, F2RL1, PTPN11, GHRL, EZR, TNF, INS	105	204	16650	7.77311	0.0252434	3.12179e-05	2.06026e-05
GOTERM_BP_FAT	GO:0032989~cellular component morphogenesis	24	22.4299	5.31429e-06	APP, TGFB1, SRC, FN1, PTPN11, ACTN4, F2, MAPK14, HIF1A, RHOA, EGFR, PTK2, KLF2, ICAM1, SOD1, VEGFA, IL6, CASP3, BCL2, BAX, CCL2, FYN, EZR, TLR2	105	1321	16650	2.88093	0.0255642	3.15811e-05	2.08424e-05
GOTERM_BP_FAT	GO:0031348~negative regulation of defense response	9	8.41121	5.42717e-06	IL10, IL2RA, PRKCD, GHRL, AGER, NFKB1, IL2, ELANE, INS	105	154	16650	9.26716	0.0261	3.22127e-05	2.12592e-05
GOTERM_BP_FAT	GO:0046718~viral entry into host cell	8	7.47664	6.03614e-06	IFITM3, CD209, MRC1, ITGA5, CCR5, CD55, ICAM1, HSPA1A	105	111	16650	11.4286	0.0289858	3.56103e-05	2.35015e-05
GOTERM_BP_FAT	GO:0044409~entry into host	8	7.47664	6.03614e-06	IFITM3, CD209, MRC1, ITGA5, CCR5, CD55, ICAM1, HSPA1A	105	111	16650	11.4286	0.0289858	3.56103e-05	2.35015e-05
GOTERM_BP_FAT	GO:0051828~entry into other organism involved in symbiotic interaction	8	7.47664	6.03614e-06	IFITM3, CD209, MRC1, ITGA5, CCR5, CD55, ICAM1, HSPA1A	105	111	16650	11.4286	0.0289858	3.56103e-05	2.35015e-05
GOTERM_BP_FAT	GO:0051806~entry into cell of other organism involved in symbiotic interaction	8	7.47664	6.03614e-06	IFITM3, CD209, MRC1, ITGA5, CCR5, CD55, ICAM1, HSPA1A	105	111	16650	11.4286	0.0289858	3.56103e-05	2.35015e-05
GOTERM_BP_FAT	GO:0030260~entry into host cell	8	7.47664	6.03614e-06	IFITM3, CD209, MRC1, ITGA5, CCR5, CD55, ICAM1, HSPA1A	105	111	16650	11.4286	0.0289858	3.56103e-05	2.35015e-05
GOTERM_BP_FAT	GO:0032774~RNA biosynthetic process	46	42.9907	6.07639e-06	IFITM3, APP, CALCA, SRC, HMGB1, FGF2, HIF1A, TNF, AGER, RELA, EGFR, INS, ICAM1, CCL5, CXCR3, CCL4, ELANE, IL10, XBP1, JUN, TGFB1, RIPK3, IFNB1, IL18, ACTN4, MAPK14, SOD2, IL2, NFKB1, KLF2, VEGFA, IL1A, CXCL10, IL6, IL5, IFNG, IRF3, IL1B, F2RL1, EZR, TP53, TLR4, TLR3, HSPA1A, NFE2L2, TLR2	105	3905	16650	1.86793	0.0291762	3.58044e-05	2.36296e-05
GOTERM_BP_FAT	GO:0070265~necrotic cell death	6	5.60748	6.10989e-06	RIPK3, IRF3, BAX, TNF, TLR4, TLR3	105	42	16650	22.6531	0.0293347	3.59149e-05	2.37025e-05
GOTERM_BP_FAT	GO:1903727~positive regulation of phospholipid metabolic process	6	5.60748	6.10989e-06	XBP1, TGFB1, SRC, PRKCD, FGF2, PTK2	105	42	16650	22.6531	0.0293347	3.59149e-05	2.37025e-05
GOTERM_BP_FAT	GO:0009790~embryo development	20	18.6916	6.19093e-06	IL10, TGFB1, CXCL8, CSF2, MMP2, FN1, PIK3CB, FGF2, HIF1A, TNF, MMP9, EGFR, PTK2, KLF2, SOD1, VEGFA, IL3, BAX, PLCG1, ITGA5	105	954	16650	3.32435	0.029718	3.63475e-05	2.3988e-05
GOTERM_BP_FAT	GO:0051279~regulation of release of sequestered calcium ion into cytosol	7	6.54206	6.229e-06	CXCL10, CXCL11, TGFB1, CXCR3, BAX, PLCG1, F2	105	73	16650	15.2055	0.029898	3.6527e-05	2.41065e-05
GOTERM_BP_FAT	GO:0045598~regulation of fat cell differentiation	8	7.47664	6.40583e-06	IL6, XBP1, TGFB1, MAPK14, SOD2, PTGS2, TNF, INS	105	112	16650	11.3265	0.0307335	3.75188e-05	2.4761e-05
GOTERM_BP_FAT	GO:0034123~positive regulation of toll-like receptor signaling pathway	5	4.6729	6.44389e-06	F2RL1, HMGB1, TLR5, TLR3, TLR2	105	20	16650	39.6429	0.0309133	3.76964e-05	2.48782e-05
GOTERM_BP_FAT	GO:0002673~regulation of acute inflammatory response	7	6.54206	6.74454e-06	IL6, IL1B, PTGS2, TNF, CD55, PIK3CG, INS	105	74	16650	15	0.032332	3.94078e-05	2.60077e-05
GOTERM_BP_FAT	GO:0002761~regulation of myeloid leukocyte differentiation	8	7.47664	6.79415e-06	IL3, CALCA, JUN, IL5, IFNG, TNF, TLR4, TLR3	105	113	16650	11.2263	0.0325659	3.96027e-05	2.61363e-05
GOTERM_BP_FAT	GO:0045807~positive regulation of endocytosis	8	7.47664	6.79415e-06	IL1B, F2RL1, CCL2, ACTN4, TNF, B2M, MBL2, VEGFA	105	113	16650	11.2263	0.0325659	3.96027e-05	2.61363e-05
GOTERM_BP_FAT	GO:0010467~gene expression	56	52.3364	6.86143e-06	IFITM3, APP, CSF2, PIK3CB, HMGB1, FGF2, TNF, ICAM1, IL10, RIPK3, PRKCD, IL18, MIF, F2, IL1A, IFNG, IRF3, IL1B, EZR, TLR4, TP53, TLR3, TLR2, CRP, CALCA, SRC, HIF1A, AGER, EGFR, RELA, HSPD1, INS, CXCR3, CCL5, CCL4, FYN, CD55, ELANE, JUN, XBP1, TGFB1, NOS2, IFNB1, FN1, MAPK14, SOD2, NFKB1, IL2, KLF2, VEGFA, CXCL10, IL6, IL5, F2RL1, NFE2L2, HSPA1A	105	5306	16650	1.67358	0.0328831	3.99471e-05	2.63636e-05
GOTERM_BP_FAT	GO:0008643~carbohydrate transport	9	8.41121	6.87088e-06	IL1B, PTPN11, AQP5, EZR, MAPK14, TNF, AQP1, NFE2L2, INS	105	159	16650	8.97574	0.0329276	3.99544e-05	2.63684e-05
GOTERM_BP_FAT	GO:0050798~activated T cell proliferation	6	5.60748	6.87967e-06	IL2RA, IL18, FYN, HMGB1, AGER, IL2	105	43	16650	22.1262	0.032969	3.99578e-05	2.63707e-05
GOTERM_BP_FAT	GO:0034976~response to endoplasmic reticulum stress	11	10.2804	7.04547e-06	XBP1, JUN, CXCL8, IFNG, AIFM1, BCL2, BAX, CCL2, TP53, HSPA1A, NFE2L2	105	269	16650	6.48433	0.03375	4.08721e-05	2.69741e-05
GOTERM_BP_FAT	GO:0046631~alpha-beta T cell activation	8	7.47664	7.20184e-06	IL6, IFNG, BCL2, IL18, HMGB1, AGER, CD55, INS	105	114	16650	11.1278	0.034486	4.17296e-05	2.754e-05
GOTERM_BP_FAT	GO:0033043~regulation of organelle organization	22	20.5607	7.36097e-06	XBP1, TGFB1, CSF2, SRC, PRKCD, HIF1A, TNF, MMP9, RHOA, PTK2, INS, ICAM1, VEGFA, IL1A, IL5, IL1B, BCL2, BAX, F2RL1, EZR, TP53, HSPA1A	105	1152	16650	3.02827	0.0352344	4.2601e-05	2.81151e-05
GOTERM_BP_FAT	GO:1904062~regulation of cation transmembrane transport	10	9.34579	7.44462e-06	CXCL10, CXCL11, TGFB1, CXCR3, BAX, ACTN4, PLCG1, F2, MMP9, PIK3CG	105	213	16650	7.44467	0.0356276	4.3034e-05	2.84008e-05
GOTERM_BP_FAT	GO:0010817~regulation of hormone levels	14	13.0841	8.09565e-06	NOS2, PTPN11, HIF1A, TNF, EGFR, INS, SGPL1, IL6, TTR, IFNG, IL1B, CCL5, GHRL, GLUL	105	475	16650	4.67368	0.0386822	4.67418e-05	3.08479e-05
GOTERM_BP_FAT	GO:0042090~interleukin-12 biosynthetic process	4	3.73832	8.13682e-06	IFNG, TLR4, RELA, NFKB1	105	7	16650	90.6122	0.0388751	4.68684e-05	3.09314e-05
GOTERM_BP_FAT	GO:0060558~regulation of calcidiol 1-monooxygenase activity	4	3.73832	8.13682e-06	IFNG, IL1B, TNF, NFKB1	105	7	16650	90.6122	0.0388751	4.68684e-05	3.09314e-05
GOTERM_BP_FAT	GO:0030316~osteoclast differentiation	7	6.54206	8.5025e-06	CALCA, IFNG, SRC, MAPK14, TNF, TLR4, TLR3	105	77	16650	14.4156	0.0405862	4.8917e-05	3.22834e-05
GOTERM_BP_FAT	GO:0034654~nucleobase-containing compound biosynthetic process	49	45.7944	8.53741e-06	IFITM3, APP, HMGB1, FGF2, TNF, ICAM1, AQP1, IL10, RIPK3, IL18, ACTN4, IL1A, IFNG, IRF3, IL1B, EZR, TLR4, TP53, TLR3, TLR2, CALCA, SRC, HIF1A, AGER, EGFR, RELA, INS, CXCR3, CCL5, CCL4, ELANE, JUN, XBP1, TGFB1, NOS2, IFNB1, ISG15, MAPK14, SOD2, NFKB1, IL2, KLF2, VEGFA, CXCL10, IL6, IL5, F2RL1, NFE2L2, HSPA1A	105	4357	16650	1.78334	0.0407494	4.90599e-05	3.23777e-05
GOTERM_BP_FAT	GO:1903169~regulation of calcium ion transmembrane transport	8	7.47664	8.54879e-06	CXCL10, CXCL11, TGFB1, CXCR3, BAX, PLCG1, F2, PIK3CG	105	117	16650	10.8425	0.0408026	4.90674e-05	3.23827e-05
GOTERM_BP_FAT	GO:0042312~regulation of vasodilation	6	5.60748	8.64586e-06	CRP, CALCA, NOS2, F2RL1, EGFR, INS	105	45	16650	21.1429	0.0412563	4.95662e-05	3.27119e-05
GOTERM_BP_FAT	GO:0045787~positive regulation of cell cycle	12	11.215	8.74266e-06	IL1A, APP, TGFB1, SRC, IL1B, BAX, PTPN11, MIF, TP53, RHOA, EGFR, INS	105	339	16650	5.61315	0.0417084	5.00622e-05	3.30392e-05
GOTERM_BP_FAT	GO:0071822~protein complex subunit organization	27	25.2336	9.02731e-06	CSF2, SRC, HMGB1, FGF2, TNF, HSPD1, INS, ICAM1, AIFM1, CCL5, GLUL, JUN, TGFB1, RIPK3, PRKCD, SIGMAR1, FN1, MIF, SOD2, PTK2, VEGFA, IL5, BAX, F2RL1, CRYAA, TP53, TLR4	105	1674	16650	2.5576	0.0430367	5.16315e-05	3.40749e-05
GOTERM_BP_FAT	GO:0070301~cellular response to hydrogen peroxide	7	6.54206	9.16474e-06	IL6, AIFM1, PRKCD, RELA, KLF2, AQP1, NFE2L2	105	78	16650	14.2308	0.0436774	5.23561e-05	3.45531e-05
GOTERM_BP_FAT	GO:0097305~response to alcohol	9	8.41121	9.4284e-06	TGFB1, CCL2, FYN, CCR5, SOD2, IL2, KLF2, ICAM1, SOD1	105	166	16650	8.59725	0.0449053	5.37993e-05	3.55055e-05
GOTERM_BP_FAT	GO:0008637~apoptotic mitochondrial changes	8	7.47664	9.55802e-06	JUN, BCL2, BAX, SOD2, TP53, MMP9, HSPD1, HSPA1A	105	119	16650	10.6603	0.0455084	5.4348e-05	3.58677e-05
GOTERM_BP_FAT	GO:0046330~positive regulation of JNK cascade	8	7.47664	9.55802e-06	IL1A, IL1B, F2RL1, HMGB1, AGER, TNF, TLR4, TLR3	105	119	16650	10.6603	0.0455084	5.4348e-05	3.58677e-05
GOTERM_BP_FAT	GO:0002224~toll-like receptor signaling pathway	8	7.47664	9.55802e-06	IRF3, F2RL1, HMGB1, TLR5, TLR4, TLR3, HSPD1, TLR2	105	119	16650	10.6603	0.0455084	5.4348e-05	3.58677e-05
GOTERM_BP_FAT	GO:0002691~regulation of cellular extravasation	5	4.6729	9.63595e-06	IL1A, RIPK3, CCL2, ELANE, ICAM1	105	22	16650	36.039	0.0458708	5.46e-05	3.6034e-05
GOTERM_BP_FAT	GO:0070230~positive regulation of lymphocyte apoptotic process	5	4.6729	9.63595e-06	IL10, CCL5, BAX, TP53, ICAM1	105	22	16650	36.039	0.0458708	5.46e-05	3.6034e-05
GOTERM_BP_FAT	GO:0032660~regulation of interleukin-17 production	5	4.6729	9.63595e-06	TGFB1, IFNG, IL18, TLR4, IL2	105	22	16650	36.039	0.0458708	5.46e-05	3.6034e-05
GOTERM_BP_FAT	GO:0010720~positive regulation of cell development	14	13.0841	9.67949e-06	TGFB1, FN1, HIF1A, RHOA, IL2, RELA, VEGFA, IL6, IL5, IFNG, BCL2, FYN, NFE2L2, TLR2	105	483	16650	4.59627	0.0460732	5.4783e-05	3.61548e-05
GOTERM_BP_FAT	GO:0007173~epidermal growth factor receptor signaling pathway	8	7.47664	1.00985e-05	APP, TGFB1, SRC, PTPN11, PLCG1, MMP9, PTK2, EGFR	105	120	16650	10.5714	0.0480192	5.70884e-05	3.76762e-05
GOTERM_BP_FAT	GO:0030855~epithelial cell differentiation	15	14.0187	1.05257e-05	XBP1, JUN, TGFB1, FGF2, HIF1A, TNF, KLF2, ICAM1, SOD1, VEGFA, IFNG, IL1B, CASP3, F2RL1, EZR	105	563	16650	4.22482	0.0499986	5.94341e-05	3.92243e-05
GOTERM_BP_FAT	GO:0002437~inflammatory response to antigenic stimulus	6	5.60748	1.07481e-05	IL10, IL2RA, HMGB1, TNF, ELANE, ICAM1	105	47	16650	20.2432	0.0510278	6.06197e-05	4.00068e-05
GOTERM_BP_FAT	GO:2000112~regulation of cellular macromolecule biosynthetic process	46	42.9907	1.1105e-05	APP, CALCA, CSF2, SRC, HMGB1, FGF2, HIF1A, TNF, AGER, RELA, EGFR, INS, ICAM1, CCL5, CXCR3, ELANE, IL10, XBP1, JUN, TGFB1, RIPK3, IFNB1, IL18, MAPK14, SOD2, IL2, NFKB1, KLF2, VEGFA, IL1A, IL3, CXCL10, IL6, IL5, IFNG, IRF3, IL1B, BCL2, F2RL1, EZR, TP53, TLR4, TLR3, HSPA1A, NFE2L2, TLR2	105	3991	16650	1.82768	0.0526766	6.25601e-05	4.12873e-05
GOTERM_BP_FAT	GO:0006259~DNA metabolic process	20	18.6916	1.12727e-05	IL10, JUN, TGFB1, CXCL8, CSF2, SRC, PRKCD, ISG15, HMGB1, EGFR, IL2, HSPD1, INS, IL3, IL6, IFNG, AIFM1, CASP3, BAX, TP53	105	995	16650	3.18737	0.0534508	6.34319e-05	4.18627e-05
GOTERM_BP_FAT	GO:0045069~regulation of viral genome replication	7	6.54206	1.14062e-05	IFITM3, CXCL8, IFNB1, CCL5, BCL2, ISG15, TNF	105	81	16650	13.7037	0.0540664	6.40352e-05	4.22609e-05
GOTERM_BP_FAT	GO:0045621~positive regulation of lymphocyte differentiation	7	6.54206	1.14062e-05	IL6, XBP1, TGFB1, IFNG, IL2RA, IL18, IL2	105	81	16650	13.7037	0.0540664	6.40352e-05	4.22609e-05
GOTERM_BP_FAT	GO:0031175~neuron projection development	18	16.8224	1.16046e-05	APP, JUN, FN1, PTPN11, HMGB1, AGER, RHOA, EGFR, IL2, PTK2, VEGFA, IL6, BCL2, FYN, GHRL, EZR, B2M, NFE2L2	105	817	16650	3.49362	0.0549804	6.50739e-05	4.29464e-05
GOTERM_BP_FAT	GO:0016064~immunoglobulin mediated immune response	9	8.41121	1.17116e-05	IL10, TGFB1, IFNG, PRKCD, TNF, CD55, IL2, HSPD1, MBL2	105	171	16650	8.34586	0.0554728	6.55983e-05	4.32924e-05
GOTERM_BP_FAT	GO:1901222~regulation of NIK/NF-kappaB signaling	6	5.60748	1.19386e-05	ACTN4, HMGB1, EZR, TNF, RELA, TLR3	105	48	16650	19.8214	0.0565174	6.66403e-05	4.39801e-05
GOTERM_BP_FAT	GO:0050710~negative regulation of cytokine secretion	6	5.60748	1.19386e-05	IL10, IL6, FN1, F2RL1, EZR, TNF	105	48	16650	19.8214	0.0565174	6.66403e-05	4.39801e-05
GOTERM_BP_FAT	GO:0051353~positive regulation of oxidoreductase activity	6	5.60748	1.19386e-05	IFNG, RIPK3, IL1B, HIF1A, TNF, INS	105	48	16650	19.8214	0.0565174	6.66403e-05	4.39801e-05
GOTERM_BP_FAT	GO:0018130~heterocycle biosynthetic process	49	45.7944	1.22129e-05	IFITM3, APP, HMGB1, FGF2, TNF, ICAM1, AQP1, IL10, RIPK3, IL18, ACTN4, IL1A, IFNG, IRF3, IL1B, EZR, TLR4, TP53, TLR3, TLR2, CALCA, SRC, HIF1A, AGER, EGFR, RELA, INS, CXCR3, CCL5, CCL4, ELANE, JUN, XBP1, TGFB1, NOS2, IFNB1, ISG15, MAPK14, SOD2, NFKB1, IL2, KLF2, VEGFA, CXCL10, IL6, IL5, F2RL1, NFE2L2, HSPA1A	105	4411	16650	1.76151	0.0577775	6.80932e-05	4.4939e-05
GOTERM_BP_FAT	GO:0001909~leukocyte mediated cytotoxicity	7	6.54206	1.22449e-05	RIPK3, NOS2, F2RL1, CCL2, AGER, B2M, ELANE	105	82	16650	13.5366	0.0579243	6.81935e-05	4.50052e-05
GOTERM_BP_FAT	GO:0019724~B cell mediated immunity	9	8.41121	1.2747e-05	IL10, TGFB1, IFNG, PRKCD, TNF, CD55, IL2, HSPD1, MBL2	105	173	16650	8.24938	0.0602267	7.09089e-05	4.67973e-05
GOTERM_BP_FAT	GO:0051852~disruption by host of symbiont cells	4	3.73832	1.29597e-05	F2RL1, CAMP, ELANE, MBL2	105	8	16650	79.2857	0.0612003	7.17645e-05	4.73619e-05
GOTERM_BP_FAT	GO:0032667~regulation of interleukin-23 production	4	3.73832	1.29597e-05	TGFB1, CSF2, IFNG, TLR4	105	8	16650	79.2857	0.0612003	7.17645e-05	4.73619e-05
GOTERM_BP_FAT	GO:0051873~killing by host of symbiont cells	4	3.73832	1.29597e-05	F2RL1, CAMP, ELANE, MBL2	105	8	16650	79.2857	0.0612003	7.17645e-05	4.73619e-05
GOTERM_BP_FAT	GO:0045348~positive regulation of MHC class II biosynthetic process	4	3.73832	1.29597e-05	IL10, XBP1, IFNG, TLR4	105	8	16650	79.2857	0.0612003	7.17645e-05	4.73619e-05
GOTERM_BP_FAT	GO:0043331~response to dsRNA	7	6.54206	1.31327e-05	TGFB1, IRF3, IFNA1, IFNB1, EGFR, NFKB1, TLR3	105	83	16650	13.3735	0.0619914	7.26398e-05	4.79396e-05
GOTERM_BP_FAT	GO:0002763~positive regulation of myeloid leukocyte differentiation	6	5.60748	1.32297e-05	IL3, CALCA, JUN, IL5, IFNG, TNF	105	49	16650	19.4169	0.0624345	7.29278e-05	4.81297e-05
GOTERM_BP_FAT	GO:0007566~embryo implantation	6	5.60748	1.32297e-05	CALCA, IL1B, MMP2, PTGS2, MMP9, SOD1	105	49	16650	19.4169	0.0624345	7.29278e-05	4.81297e-05
GOTERM_BP_FAT	GO:0010524~positive regulation of calcium ion transport into cytosol	6	5.60748	1.32297e-05	CXCL10, CXCL11, CXCR3, BAX, PLCG1, F2	105	49	16650	19.4169	0.0624345	7.29278e-05	4.81297e-05
GOTERM_BP_FAT	GO:0019438~aromatic compound biosynthetic process	49	45.7944	1.32959e-05	IFITM3, APP, HMGB1, FGF2, TNF, ICAM1, AQP1, IL10, RIPK3, IL18, ACTN4, IL1A, IFNG, IRF3, IL1B, EZR, TLR4, TP53, TLR3, TLR2, CALCA, SRC, HIF1A, AGER, EGFR, RELA, INS, CXCR3, CCL5, CCL4, ELANE, JUN, XBP1, TGFB1, NOS2, IFNB1, ISG15, MAPK14, SOD2, NFKB1, IL2, KLF2, VEGFA, CXCL10, IL6, IL5, F2RL1, NFE2L2, HSPA1A	105	4424	16650	1.75633	0.0627372	7.32103e-05	4.83161e-05
GOTERM_BP_FAT	GO:1903506~regulation of nucleic acid-templated transcription	43	40.1869	1.36366e-05	APP, CALCA, SRC, HMGB1, FGF2, HIF1A, TNF, AGER, RELA, EGFR, INS, ICAM1, CXCR3, ELANE, IL10, XBP1, JUN, TGFB1, RIPK3, IFNB1, IL18, ACTN4, MAPK14, SOD2, IL2, NFKB1, KLF2, VEGFA, IL1A, CXCL10, IL6, IL5, IFNG, IRF3, IL1B, F2RL1, EZR, TP53, TLR4, TLR3, HSPA1A, NFE2L2, TLR2	105	3625	16650	1.88099	0.0642918	7.50013e-05	4.94981e-05
GOTERM_BP_FAT	GO:0050796~regulation of insulin secretion	9	8.41121	1.38586e-05	IFNG, NOS2, CCL5, IL1B, PTPN11, GHRL, GLUL, HIF1A, TNF	105	175	16650	8.1551	0.0653033	7.61362e-05	5.0247e-05
GOTERM_BP_FAT	GO:0030193~regulation of blood coagulation	7	6.54206	1.40719e-05	PLAU, PRKCD, F2RL1, F2, TLR4, KNG1, NFE2L2	105	84	16650	13.2143	0.0662744	7.70474e-05	5.08484e-05
GOTERM_BP_FAT	GO:1900046~regulation of hemostasis	7	6.54206	1.40719e-05	PLAU, PRKCD, F2RL1, F2, TLR4, KNG1, NFE2L2	105	84	16650	13.2143	0.0662744	7.70474e-05	5.08484e-05
GOTERM_BP_FAT	GO:0030593~neutrophil chemotaxis	7	6.54206	1.40719e-05	CXCL8, IFNG, CCL5, IL1B, CCL4, CCL2, PIK3CG	105	84	16650	13.2143	0.0662744	7.70474e-05	5.08484e-05
GOTERM_BP_FAT	GO:0030030~cell projection organization	23	21.4953	1.40958e-05	APP, JUN, SRC, PRKCD, FN1, PTPN11, HMGB1, AGER, RHOA, EGFR, IL2, PTK2, ICAM1, SOD1, VEGFA, IL6, BCL2, F2RL1, FYN, GHRL, EZR, B2M, NFE2L2	105	1301	16650	2.80334	0.0663834	7.7092e-05	5.08779e-05
GOTERM_BP_FAT	GO:0071359~cellular response to dsRNA	6	5.60748	1.46271e-05	TGFB1, IRF3, IFNB1, EGFR, NFKB1, TLR3	105	50	16650	19.0286	0.0687973	7.99078e-05	5.27362e-05
GOTERM_BP_FAT	GO:0061138~morphogenesis of a branching epithelium	9	8.41121	1.50506e-05	IL10, IL6, TGFB1, SRC, BCL2, BAX, TNF, FGF2, VEGFA	105	177	16650	8.06295	0.0707174	8.20378e-05	5.41419e-05
GOTERM_BP_FAT	GO:1903900~regulation of viral life cycle	9	8.41121	1.50506e-05	IFITM3, JUN, CXCL8, IFNB1, CCL5, CCL4, BCL2, ISG15, TNF	105	177	16650	8.06295	0.0707174	8.20378e-05	5.41419e-05
GOTERM_BP_FAT	GO:0009411~response to UV	8	7.47664	1.54059e-05	BCL2, BAX, PTGS2, TP53, RELA, EGFR, ELANE, AQP1	105	128	16650	9.91071	0.0723249	8.38806e-05	5.53581e-05
GOTERM_BP_FAT	GO:0006886~intracellular protein transport	20	18.6916	1.59802e-05	IL10, XBP1, JUN, TGFB1, PRKCD, IL18, PTPN11, PTGS2, MAPK14, TNF, RHOA, EGFR, IL6, IFNG, IL1B, CCL2, TP53, TLR4, TLR3, TLR2	105	1020	16650	3.10924	0.0749173	8.69102e-05	5.73575e-05
GOTERM_BP_FAT	GO:0033273~response to vitamin	7	6.54206	1.6113e-05	CXCL10, TGFB1, CCL2, SOD2, PTGS2, RELA, EGFR	105	86	16650	12.907	0.0755159	8.74698e-05	5.77268e-05
GOTERM_BP_FAT	GO:0034121~regulation of toll-like receptor signaling pathway	6	5.60748	1.61369e-05	F2RL1, HMGB1, TLR5, TLR4, TLR3, TLR2	105	51	16650	18.6555	0.0756236	8.74698e-05	5.77268e-05
GOTERM_BP_FAT	GO:0010332~response to gamma radiation	6	5.60748	1.61369e-05	CXCL10, BCL2, BAX, CCL2, SOD2, TP53	105	51	16650	18.6555	0.0756236	8.74698e-05	5.77268e-05
GOTERM_BP_FAT	GO:0010810~regulation of cell-substrate adhesion	9	8.41121	1.63279e-05	PLAU, SRC, BCL2, FN1, ACTN4, PIK3CB, ITGA5, PTK2, VEGFA	105	179	16650	7.97287	0.0764834	8.84065e-05	5.8345e-05
GOTERM_BP_FAT	GO:0071354~cellular response to interleukin-6	5	4.6729	1.64253e-05	IL6, CCL2, RELA, CAMP, NFKB1	105	25	16650	31.7143	0.0769215	8.87365e-05	5.85628e-05
GOTERM_BP_FAT	GO:0032620~interleukin-17 production	5	4.6729	1.64253e-05	TGFB1, IFNG, IL18, TLR4, IL2	105	25	16650	31.7143	0.0769215	8.87365e-05	5.85628e-05
GOTERM_BP_FAT	GO:0048013~ephrin receptor signaling pathway	7	6.54206	1.72196e-05	SRC, MMP2, PTPN11, FYN, MMP9, PTK2, RHOA	105	87	16650	12.7586	0.0804879	9.28223e-05	6.12593e-05
GOTERM_BP_FAT	GO:1903524~positive regulation of blood circulation	7	6.54206	1.72196e-05	CALCA, NOS2, F2RL1, PTGS2, EGFR, ICAM1, INS	105	87	16650	12.7586	0.0804879	9.28223e-05	6.12593e-05
GOTERM_BP_FAT	GO:0016049~cell growth	13	12.1495	1.75122e-05	APP, XBP1, TGFB1, FN1, F2, EGFR, IL2, INS, VEGFA, IL6, IL9, BCL2, TP53	105	436	16650	4.72805	0.0817979	9.4295e-05	6.22312e-05
GOTERM_BP_FAT	GO:1903522~regulation of blood circulation	11	10.2804	1.81904e-05	CRP, CALCA, IFNG, NOS2, F2RL1, PTGS2, EGFR, IL2, PIK3CG, ICAM1, INS	105	300	16650	5.81429	0.0848274	9.78386e-05	6.45698e-05
GOTERM_BP_FAT	GO:0001660~fever generation	4	3.73832	1.93512e-05	IL1A, IL1B, PTGS2, TNF	105	9	16650	70.4762	0.0899899	0.000103739	6.84638e-05
GOTERM_BP_FAT	GO:0045075~regulation of interleukin-12 biosynthetic process	4	3.73832	1.93512e-05	IFNG, TLR4, RELA, NFKB1	105	9	16650	70.4762	0.0899899	0.000103739	6.84638e-05
GOTERM_BP_FAT	GO:0060556~regulation of vitamin D biosynthetic process	4	3.73832	1.93512e-05	IFNG, IL1B, TNF, NFKB1	105	9	16650	70.4762	0.0899899	0.000103739	6.84638e-05
GOTERM_BP_FAT	GO:0014910~regulation of smooth muscle cell migration	6	5.60748	1.95193e-05	XBP1, PLAU, SRC, CCL5, BCL2, NFE2L2	105	53	16650	17.9515	0.0907349	0.000104525	6.89826e-05
GOTERM_BP_FAT	GO:1903901~negative regulation of viral life cycle	7	6.54206	1.96169e-05	IFITM3, JUN, IFNB1, CCL5, CCL4, ISG15, TNF	105	89	16650	12.4719	0.0911673	0.000104817	6.91755e-05
GOTERM_BP_FAT	GO:0050818~regulation of coagulation	7	6.54206	1.96169e-05	PLAU, PRKCD, F2RL1, F2, TLR4, KNG1, NFE2L2	105	89	16650	12.4719	0.0911673	0.000104817	6.91755e-05
GOTERM_BP_FAT	GO:0044085~cellular component biogenesis	37	34.5794	1.9795e-05	APP, CSF2, SRC, HMGB1, FGF2, TNF, HSPD1, INS, ICAM1, AIFM1, CCL5, GLUL, JUN, TGFB1, RIPK3, PRKCD, SIGMAR1, FN1, PTPN11, ACTN4, MIF, SOD2, RHOA, PTK2, VEGFA, IL5, BCL2, BAX, F2RL1, GHRL, ITGA5, CRYAA, EZR, TP53, TLR4, HSPA1A, TLR2	105	2914	16650	2.01343	0.0919554	0.000105653	6.97269e-05
GOTERM_BP_FAT	GO:0043279~response to alkaloid	8	7.47664	2.07484e-05	IL6, CASP3, BCL2, TNF, RELA, NFKB1, HSPD1, ICAM1	105	134	16650	9.46695	0.0961647	0.00011062	7.30054e-05
GOTERM_BP_FAT	GO:0002009~morphogenesis of an epithelium	14	13.0841	2.15568e-05	IL10, TGFB1, SRC, FGF2, HIF1A, TNF, RHOA, EGFR, VEGFA, IL6, BCL2, BAX, ITGA5, EZR	105	521	16650	4.26104	0.0997181	0.000114805	7.57668e-05
GOTERM_BP_FAT	GO:0007569~cell aging	7	6.54206	2.22763e-05	PRKCD, BCL2, MIF, MAPK14, TP53, ICAM1, SOD1	105	91	16650	12.1978	0.102869	0.000118507	7.82103e-05
GOTERM_BP_FAT	GO:0000902~cell morphogenesis	22	20.5607	2.24685e-05	APP, TGFB1, SRC, FN1, PTPN11, ACTN4, F2, MAPK14, HIF1A, RHOA, EGFR, PTK2, KLF2, ICAM1, SOD1, VEGFA, IL6, CASP3, BCL2, CCL2, FYN, EZR	105	1240	16650	2.81336	0.103709	0.000119399	7.87989e-05
GOTERM_BP_FAT	GO:0010575~positive regulation of vascular endothelial growth factor production	5	4.6729	2.25698e-05	IL1A, TGFB1, IL1B, PTGS2, HIF1A	105	27	16650	29.3651	0.104152	0.000119547	7.88963e-05
GOTERM_BP_FAT	GO:0042104~positive regulation of activated T cell proliferation	5	4.6729	2.25698e-05	IL2RA, IL18, HMGB1, AGER, IL2	105	27	16650	29.3651	0.104152	0.000119547	7.88963e-05
GOTERM_BP_FAT	GO:0002675~positive regulation of acute inflammatory response	5	4.6729	2.25698e-05	IL6, IL1B, PTGS2, TNF, PIK3CG	105	27	16650	29.3651	0.104152	0.000119547	7.88963e-05
GOTERM_BP_FAT	GO:0002831~regulation of response to biotic stimulus	8	7.47664	2.28369e-05	IL2RA, F2RL1, FYN, HMGB1, MIF, B2M, CD55, HSPD1	105	136	16650	9.32773	0.105317	0.00012083	7.9743e-05
GOTERM_BP_FAT	GO:0048146~positive regulation of fibroblast proliferation	6	5.60748	2.34293e-05	JUN, TGFB1, FN1, MIF, EGFR, AQP1	105	55	16650	17.2987	0.107896	0.000123696	8.16345e-05
GOTERM_BP_FAT	GO:0071385~cellular response to glucocorticoid stimulus	6	5.60748	2.34293e-05	IL6, TGFB1, IFNB1, CCL2, EGFR, AQP1	105	55	16650	17.2987	0.107896	0.000123696	8.16345e-05
GOTERM_BP_FAT	GO:0030888~regulation of B cell proliferation	6	5.60748	2.55994e-05	IL10, IL5, BCL2, MIF, TLR4, IL2	105	56	16650	16.9898	0.11728	0.00013486	8.90028e-05
GOTERM_BP_FAT	GO:0045740~positive regulation of DNA replication	6	5.60748	2.55994e-05	IL3, IL6, JUN, CSF2, EGFR, INS	105	56	16650	16.9898	0.11728	0.00013486	8.90028e-05
GOTERM_BP_FAT	GO:0034330~cell junction organization	10	9.34579	2.58601e-05	TGFB1, SRC, BCL2, FN1, ACTN4, ITGA5, TNF, PTK2, RHOA, VEGFA	105	249	16650	6.36833	0.118401	0.000136086	8.9812e-05
GOTERM_BP_FAT	GO:0034329~cell junction assembly	9	8.41121	2.70586e-05	SRC, BCL2, FN1, ACTN4, ITGA5, TNF, PTK2, RHOA, VEGFA	105	192	16650	7.43304	0.123535	0.00014224	9.38732e-05
GOTERM_BP_FAT	GO:0071803~positive regulation of podosome assembly	4	3.73832	2.7519e-05	CSF2, IL5, SRC, TNF	105	10	16650	63.4286	0.125499	0.000144505	9.53677e-05
GOTERM_BP_FAT	GO:0032611~interleukin-1 beta production	6	5.60748	2.79225e-05	IFNG, IL1B, F2RL1, GHRL, HMGB1, TLR4	105	57	16650	16.6917	0.127217	0.000146308	9.65577e-05
GOTERM_BP_FAT	GO:0014909~smooth muscle cell migration	6	5.60748	2.79225e-05	XBP1, PLAU, SRC, CCL5, BCL2, NFE2L2	105	57	16650	16.6917	0.127217	0.000146308	9.65577e-05
GOTERM_BP_FAT	GO:0006355~regulation of transcription, DNA-templated	42	39.2523	2.90376e-05	APP, CALCA, SRC, HMGB1, FGF2, HIF1A, TNF, AGER, RELA, EGFR, INS, ICAM1, CXCR3, ELANE, IL10, XBP1, JUN, TGFB1, RIPK3, IFNB1, IL18, MAPK14, SOD2, IL2, NFKB1, KLF2, VEGFA, IL1A, CXCL10, IL6, IL5, IFNG, IRF3, IL1B, F2RL1, EZR, TP53, TLR4, TLR3, HSPA1A, NFE2L2, TLR2	105	3603	16650	1.84846	0.131947	0.000151987	0.000100306
GOTERM_BP_FAT	GO:0045861~negative regulation of proteolysis	11	10.2804	2.91549e-05	IL10, APP, IL6, SRC, F2, MMP9, KNG1, CD55, AQP1, INS, VEGFA	105	317	16650	5.50248	0.132443	0.000152438	0.000100603
GOTERM_BP_FAT	GO:0006351~transcription, DNA-templated	42	39.2523	2.9437e-05	APP, CALCA, SRC, HMGB1, FGF2, HIF1A, TNF, AGER, RELA, EGFR, INS, ICAM1, CXCR3, ELANE, IL10, XBP1, JUN, TGFB1, RIPK3, IFNB1, IL18, MAPK14, SOD2, IL2, NFKB1, KLF2, VEGFA, IL1A, CXCL10, IL6, IL5, IFNG, IRF3, IL1B, F2RL1, EZR, TP53, TLR4, TLR3, HSPA1A, NFE2L2, TLR2	105	3605	16650	1.84743	0.133635	0.000153747	0.000101468
GOTERM_BP_FAT	GO:0050769~positive regulation of neurogenesis	12	11.215	2.98944e-05	IL6, IFNG, BCL2, FN1, FYN, HIF1A, RELA, RHOA, IL2, TLR2, NFE2L2, VEGFA	105	387	16650	4.91694	0.135564	0.000155969	0.000102934
GOTERM_BP_FAT	GO:0001763~morphogenesis of a branching structure	9	8.41121	3.0234e-05	IL10, IL6, TGFB1, SRC, BCL2, BAX, TNF, FGF2, VEGFA	105	195	16650	7.31868	0.136993	0.000156998	0.000103613
GOTERM_BP_FAT	GO:0032770~positive regulation of monooxygenase activity	5	4.6729	3.02527e-05	IFNG, IL1B, HIF1A, TNF, INS	105	29	16650	27.3399	0.137072	0.000156998	0.000103613
GOTERM_BP_FAT	GO:0045909~positive regulation of vasodilation	5	4.6729	3.02527e-05	CALCA, NOS2, F2RL1, EGFR, INS	105	29	16650	27.3399	0.137072	0.000156998	0.000103613
GOTERM_BP_FAT	GO:0042036~negative regulation of cytokine biosynthetic process	5	4.6729	3.02527e-05	IL10, IL6, GHRL, NFKB1, ELANE	105	29	16650	27.3399	0.137072	0.000156998	0.000103613
GOTERM_BP_FAT	GO:0070741~response to interleukin-6	5	4.6729	3.02527e-05	IL6, CCL2, RELA, CAMP, NFKB1	105	29	16650	27.3399	0.137072	0.000156998	0.000103613
GOTERM_BP_FAT	GO:0048678~response to axon injury	6	5.60748	3.0406e-05	JUN, BCL2, BAX, SOD2, FGF2, SOD1	105	58	16650	16.4039	0.137716	0.000157291	0.000103806
GOTERM_BP_FAT	GO:1903725~regulation of phospholipid metabolic process	6	5.60748	3.0406e-05	XBP1, TGFB1, SRC, PRKCD, FGF2, PTK2	105	58	16650	16.4039	0.137716	0.000157291	0.000103806
GOTERM_BP_FAT	GO:0001836~release of cytochrome c from mitochondria	6	5.60748	3.0406e-05	JUN, BCL2, BAX, SOD2, TP53, MMP9	105	58	16650	16.4039	0.137716	0.000157291	0.000103806
GOTERM_BP_FAT	GO:0051726~regulation of cell cycle	19	17.757	3.15206e-05	IL10, APP, JUN, TGFB1, CXCL8, SRC, PTPN11, MIF, PTGS2, FGF2, RHOA, EGFR, INS, IL1A, IFNG, IL1B, BCL2, BAX, TP53	105	976	16650	3.08694	0.142387	0.000162884	0.000107498
GOTERM_BP_FAT	GO:0008610~lipid biosynthetic process	15	14.0187	3.29877e-05	XBP1, PRKCD, PTPN11, PIK3CB, MIF, PTGS2, FGF2, TNF, PIK3CG, NFKB1, INS, SOD1, SGPL1, IFNG, IL1B	105	624	16650	3.81181	0.148496	0.000170285	0.000112382
GOTERM_BP_FAT	GO:1904427~positive regulation of calcium ion transmembrane transport	6	5.60748	3.30575e-05	CXCL10, CXCL11, CXCR3, BAX, PLCG1, F2	105	59	16650	16.1259	0.148786	0.000170465	0.0001125
GOTERM_BP_FAT	GO:0009743~response to carbohydrate	9	8.41121	3.37158e-05	XBP1, TGFB1, IL1B, CASP3, SOD2, PTGS2, GLUL, HIF1A, ICAM1	105	198	16650	7.20779	0.151513	0.000173676	0.00011462
GOTERM_BP_FAT	GO:0006644~phospholipid metabolic process	12	11.215	3.44029e-05	XBP1, TGFB1, SRC, PRKCD, PTPN11, FYN, PLCG1, PIK3CB, FGF2, PTK2, EGFR, PIK3CG	105	393	16650	4.84188	0.154349	0.000177028	0.000116832
GOTERM_BP_FAT	GO:0010573~vascular endothelial growth factor production	5	4.6729	3.47398e-05	IL1A, TGFB1, IL1B, PTGS2, HIF1A	105	30	16650	26.4286	0.155736	0.000178197	0.000117604
GOTERM_BP_FAT	GO:2000108~positive regulation of leukocyte apoptotic process	5	4.6729	3.47398e-05	IL10, CCL5, BAX, TP53, ICAM1	105	30	16650	26.4286	0.155736	0.000178197	0.000117604
GOTERM_BP_FAT	GO:1902175~regulation of oxidative stress-induced intrinsic apoptotic signaling pathway	5	4.6729	3.47398e-05	SOD2, HIF1A, SOD1, NFE2L2, INS	105	30	16650	26.4286	0.155736	0.000178197	0.000117604
GOTERM_BP_FAT	GO:0061045~negative regulation of wound healing	6	5.60748	3.58849e-05	PLAU, PRKCD, F2, AGER, FGF2, KNG1	105	60	16650	15.8571	0.160434	0.000183877	0.000121352
GOTERM_BP_FAT	GO:0045080~positive regulation of chemokine biosynthetic process	4	3.73832	3.76668e-05	IFNG, IL1B, TNF, TLR3	105	11	16650	57.6623	0.167693	0.000192401	0.000126977
GOTERM_BP_FAT	GO:0042368~vitamin D biosynthetic process	4	3.73832	3.76668e-05	IFNG, IL1B, TNF, NFKB1	105	11	16650	57.6623	0.167693	0.000192401	0.000126977
GOTERM_BP_FAT	GO:0051024~positive regulation of immunoglobulin secretion	4	3.73832	3.76668e-05	IL6, XBP1, IL5, IL2	105	11	16650	57.6623	0.167693	0.000192401	0.000126977
GOTERM_BP_FAT	GO:0001936~regulation of endothelial cell proliferation	7	6.54206	3.80736e-05	JUN, CXCR3, CCL2, GHRL, HIF1A, FGF2, VEGFA	105	100	16650	11.1	0.169341	0.000193869	0.000127947
GOTERM_BP_FAT	GO:0002698~negative regulation of immune effector process	7	6.54206	3.80736e-05	IL10, TGFB1, IFNB1, IL2RA, TNF, CD55, INS	105	100	16650	11.1	0.169341	0.000193869	0.000127947
GOTERM_BP_FAT	GO:1904064~positive regulation of cation transmembrane transport	7	6.54206	3.80736e-05	CXCL10, CXCL11, CXCR3, BAX, ACTN4, PLCG1, F2	105	100	16650	11.1	0.169341	0.000193869	0.000127947
GOTERM_BP_FAT	GO:0065003~macromolecular complex assembly	26	24.2991	3.92461e-05	CSF2, SRC, HMGB1, FGF2, TNF, HSPD1, INS, ICAM1, AIFM1, CCL5, GLUL, JUN, TGFB1, RIPK3, PRKCD, SIGMAR1, FN1, MIF, SOD2, PTK2, VEGFA, IL5, BAX, CRYAA, TP53, TLR4	105	1710	16650	2.41103	0.174074	0.000199631	0.000131749
GOTERM_BP_FAT	GO:0038127~ERBB signaling pathway	8	7.47664	3.93354e-05	APP, TGFB1, SRC, PTPN11, PLCG1, MMP9, PTK2, EGFR	105	148	16650	8.57143	0.174433	0.000199876	0.000131911
GOTERM_BP_FAT	GO:0032728~positive regulation of interferon-beta production	5	4.6729	3.96956e-05	IRF3, HMGB1, TLR4, TLR3, TLR2	105	31	16650	25.576	0.175881	0.000201496	0.00013298
GOTERM_BP_FAT	GO:0030163~protein catabolic process	17	15.8879	4.12569e-05	IL10, XBP1, NOS2, ISG15, TNF, EGFR, RELA, PTK2, INS, IFNG, IL1B, FYN, EZR, TP53, ELANE, HSPA1A, NFE2L2	105	811	16650	3.32394	0.182128	0.000209204	0.000138067
GOTERM_BP_FAT	GO:1900076~regulation of cellular response to insulin stimulus	6	5.60748	4.20996e-05	SRC, IL1B, PRKCD, PTPN11, RELA, INS	105	62	16650	15.3456	0.185479	0.000213255	0.00014074
GOTERM_BP_FAT	GO:0007417~central nervous system development	18	16.8224	4.2236e-05	APP, TGFB1, SRC, PTPN11, F2, FGF2, AGER, HIF1A, RHOA, EGFR, PTK2, AQP1, CASP3, BCL2, BAX, FYN, TLR4, TLR2	105	904	16650	3.1574	0.186021	0.000213724	0.00014105
GOTERM_BP_FAT	GO:0043112~receptor metabolic process	8	7.47664	4.28566e-05	IL10, CALCA, TGFB1, CXCL8, EZR, HIF1A, TNF, VEGFA	105	150	16650	8.45714	0.188479	0.000216639	0.000142974
GOTERM_BP_FAT	GO:0071705~nitrogen compound transport	16	14.9533	4.2936e-05	CSF2, NOS2, PTPN11, HIF1A, TNF, EGFR, AQP1, INS, IL6, TTR, IFNG, CD209, IL1B, CCL5, GHRL, GLUL	105	725	16650	3.49951	0.188793	0.000216816	0.00014309
GOTERM_BP_FAT	GO:0009890~negative regulation of biosynthetic process	24	22.4299	4.30879e-05	IL10, IFITM3, XBP1, JUN, CALCA, TGFB1, SRC, HMGB1, TNF, EGFR, RELA, NFKB1, HSPD1, INS, SOD1, VEGFA, IL6, IFNG, CCL5, CCL4, GHRL, EZR, TP53, ELANE	105	1504	16650	2.5304	0.189393	0.000217357	0.000143448
GOTERM_BP_FAT	GO:0006887~exocytosis	12	11.215	4.42075e-05	APP, TGFB1, IFNG, CCL5, ALB, FN1, F2RL1, ACTN4, KNG1, PIK3CG, SOD1, VEGFA	105	404	16650	4.71004	0.193804	0.000222775	0.000147023
GOTERM_BP_FAT	GO:0044248~cellular catabolic process	25	23.3645	4.53326e-05	HMGB1, HIF1A, TNF, PIK3CG, INS, SGPL1, AIFM1, CASP3, NEU1, PLCG1, GLUL, IL10, XBP1, TGFB1, NOS2, PRKCD, ISG15, PTK2, IFNG, IL1B, BAX, EZR, TP53, HSPA1A, NFE2L2	105	1616	16650	2.45315	0.198212	0.000228209	0.000150609
GOTERM_BP_FAT	GO:1900407~regulation of cellular response to oxidative stress	6	5.60748	4.55034e-05	SOD2, HIF1A, TNF, SOD1, NFE2L2, INS	105	63	16650	15.102	0.198879	0.000228596	0.000150865
GOTERM_BP_FAT	GO:0032652~regulation of interleukin-1 production	6	5.60748	4.55034e-05	IL10, CALCA, IFNG, GHRL, HMGB1, TLR4	105	63	16650	15.102	0.198879	0.000228596	0.000150865
GOTERM_BP_FAT	GO:0034762~regulation of transmembrane transport	12	11.215	4.62274e-05	CXCL10, CXCL11, TGFB1, CXCR3, BCL2, BAX, ACTN4, PLCG1, F2, MMP9, PIK3CG, INS	105	406	16650	4.68684	0.2017	0.000231994	0.000153107
GOTERM_BP_FAT	GO:0002693~positive regulation of cellular extravasation	4	3.73832	4.99944e-05	IL1A, CCL2, ELANE, ICAM1	105	12	16650	52.8571	0.216221	0.000250126	0.000165074
GOTERM_BP_FAT	GO:0030656~regulation of vitamin metabolic process	4	3.73832	4.99944e-05	IFNG, IL1B, TNF, NFKB1	105	12	16650	52.8571	0.216221	0.000250126	0.000165074
GOTERM_BP_FAT	GO:0035747~natural killer cell chemotaxis	4	3.73832	4.99944e-05	CCL5, CCL4, CCL2, PIK3CG	105	12	16650	52.8571	0.216221	0.000250126	0.000165074
GOTERM_BP_FAT	GO:0002223~stimulatory C-type lectin receptor signaling pathway	7	6.54206	5.01249e-05	CLEC4A, CD209, SRC, PRKCD, FYN, RELA, NFKB1	105	105	16650	10.5714	0.21672	0.000250265	0.000165166
GOTERM_BP_FAT	GO:0042698~ovulation cycle	7	6.54206	5.01249e-05	SGPL1, BCL2, BAX, EGFR, ICAM1, SOD1, VEGFA	105	105	16650	10.5714	0.21672	0.000250265	0.000165166
GOTERM_BP_FAT	GO:0030307~positive regulation of cell growth	8	7.47664	5.06771e-05	IL9, BCL2, FN1, F2, EGFR, IL2, INS, VEGFA	105	154	16650	8.23748	0.218825	0.000252763	0.000166814
GOTERM_BP_FAT	GO:0002720~positive regulation of cytokine production involved in immune response	5	4.6729	5.11309e-05	IL6, F2RL1, MIF, B2M, TLR4	105	33	16650	24.026	0.22055	0.000254505	0.000167964
GOTERM_BP_FAT	GO:0033198~response to ATP	5	4.6729	5.11309e-05	IL1B, CCL2, PTGS2, HSPD1, SOD1	105	33	16650	24.026	0.22055	0.000254505	0.000167964
GOTERM_BP_FAT	GO:0010952~positive regulation of peptidase activity	8	7.47664	5.28048e-05	APP, AIFM1, CASP3, FN1, BAX, HMGB1, TNF, HSPD1	105	155	16650	8.18433	0.226883	0.000262569	0.000173286
GOTERM_BP_FAT	GO:0038061~NIK/NF-kappaB signaling	7	6.54206	5.57254e-05	RIPK3, ACTN4, HMGB1, TNF, RELA, NFKB1, TLR3	105	107	16650	10.3738	0.237809	0.000276527	0.000182498
GOTERM_BP_FAT	GO:0002220~innate immune response activating cell surface receptor signaling pathway	7	6.54206	5.57254e-05	CLEC4A, CD209, SRC, PRKCD, FYN, RELA, NFKB1	105	107	16650	10.3738	0.237809	0.000276527	0.000182498
GOTERM_BP_FAT	GO:0031344~regulation of cell projection organization	14	13.0841	5.65585e-05	SRC, PRKCD, FN1, RHOA, IL2, PTK2, ICAM1, VEGFA, IL6, F2RL1, FYN, EZR, B2M, NFE2L2	105	572	16650	3.88112	0.240897	0.000280162	0.000184897
GOTERM_BP_FAT	GO:0071560~cellular response to transforming growth factor beta stimulus	9	8.41121	5.65729e-05	XBP1, JUN, TGFB1, SRC, CCL2, FYN, PTK2, RHOA, HSPA1A	105	213	16650	6.7002	0.24095	0.000280162	0.000184897
GOTERM_BP_FAT	GO:1902930~regulation of alcohol biosynthetic process	5	4.6729	5.76711e-05	IFNG, IL1B, TNF, NFKB1, SOD1	105	34	16650	23.3193	0.245001	0.000284445	0.000187723
GOTERM_BP_FAT	GO:0010742~macrophage derived foam cell differentiation	5	4.6729	5.76711e-05	CRP, TGFB1, CSF2, IL18, NFKB1	105	34	16650	23.3193	0.245001	0.000284445	0.000187723
GOTERM_BP_FAT	GO:0090218~positive regulation of lipid kinase activity	5	4.6729	5.76711e-05	TGFB1, SRC, F2, FGF2, PTK2	105	34	16650	23.3193	0.245001	0.000284445	0.000187723
GOTERM_BP_FAT	GO:0090077~foam cell differentiation	5	4.6729	5.76711e-05	CRP, TGFB1, CSF2, IL18, NFKB1	105	34	16650	23.3193	0.245001	0.000284445	0.000187723
GOTERM_BP_FAT	GO:0023061~signal release	12	11.215	5.88201e-05	IL6, IFNG, NOS2, CCL5, IL1B, PTPN11, GHRL, GLUL, HIF1A, TNF, EGFR, INS	105	417	16650	4.56321	0.249217	0.000289818	0.000191269
GOTERM_BP_FAT	GO:0071559~response to transforming growth factor beta	9	8.41121	6.04191e-05	XBP1, JUN, TGFB1, SRC, CCL2, FYN, PTK2, RHOA, HSPA1A	105	215	16650	6.63787	0.255045	0.000297396	0.00019627
GOTERM_BP_FAT	GO:0014812~muscle cell migration	6	5.60748	6.12984e-05	XBP1, PLAU, SRC, CCL5, BCL2, NFE2L2	105	67	16650	14.2004	0.25823	0.00030142	0.000198926
GOTERM_BP_FAT	GO:0050866~negative regulation of cell activation	8	7.47664	6.20609e-05	IL10, TGFB1, IFNB1, IL2RA, PRKCD, HMGB1, F2, IL2	105	159	16650	7.97844	0.260982	0.000304555	0.000200995
GOTERM_BP_FAT	GO:0007179~transforming growth factor beta receptor signaling pathway	8	7.47664	6.20609e-05	XBP1, JUN, TGFB1, SRC, CCL2, PTK2, RHOA, HSPA1A	105	159	16650	7.97844	0.260982	0.000304555	0.000200995
GOTERM_BP_FAT	GO:0002374~cytokine secretion involved in immune response	4	3.73832	6.46976e-05	IL10, F2RL1, TNF, TLR2	105	13	16650	48.7912	0.270417	0.00031622	0.000208694
GOTERM_BP_FAT	GO:0045351~type I interferon biosynthetic process	4	3.73832	6.46976e-05	IL10, IRF3, TLR4, TLR3	105	13	16650	48.7912	0.270417	0.00031622	0.000208694
GOTERM_BP_FAT	GO:0045346~regulation of MHC class II biosynthetic process	4	3.73832	6.46976e-05	IL10, XBP1, IFNG, TLR4	105	13	16650	48.7912	0.270417	0.00031622	0.000208694
GOTERM_BP_FAT	GO:0010623~programmed cell death involved in cell development	4	3.73832	6.46976e-05	IL1A, IL1B, BCL2, BAX	105	13	16650	48.7912	0.270417	0.00031622	0.000208694
GOTERM_BP_FAT	GO:0032963~collagen metabolic process	7	6.54206	6.50539e-05	IL6, TGFB1, MMP2, CCL2, F2, HIF1A, MMP9	105	110	16650	10.0909	0.271682	0.000317643	0.000209633
GOTERM_BP_FAT	GO:1903035~negative regulation of response to wounding	6	5.60748	6.58374e-05	PLAU, PRKCD, F2, AGER, FGF2, KNG1	105	68	16650	13.9916	0.274458	0.000321147	0.000211945
GOTERM_BP_FAT	GO:0048589~developmental growth	14	13.0841	6.86315e-05	APP, TGFB1, FN1, PTPN11, MAPK14, FGF2, PTK2, KLF2, SOD1, VEGFA, SGPL1, BCL2, GHRL, EZR	105	583	16650	3.80789	0.284271	0.000334442	0.000220719
GOTERM_BP_FAT	GO:0022411~cellular component disassembly	13	12.1495	6.89894e-05	TGFB1, MMP2, PRKCD, FN1, HMGB1, HIF1A, TNF, MMP9, PTK2, CASP3, BAX, F2RL1, ELANE	105	502	16650	4.10643	0.285517	0.000335849	0.000221648
GOTERM_BP_FAT	GO:1902882~regulation of response to oxidative stress	6	5.60748	7.06312e-05	SOD2, HIF1A, TNF, SOD1, NFE2L2, INS	105	69	16650	13.7888	0.291212	0.000343499	0.000226697
GOTERM_BP_FAT	GO:0009416~response to light stimulus	10	9.34579	7.1846e-05	APP, BCL2, BAX, PTGS2, HIF1A, TP53, RELA, EGFR, ELANE, AQP1	105	284	16650	5.5835	0.295395	0.000349058	0.000230366
GOTERM_BP_FAT	GO:0046328~regulation of JNK cascade	8	7.47664	7.26047e-05	IL1A, IL1B, F2RL1, HMGB1, AGER, TNF, TLR4, TLR3	105	163	16650	7.78265	0.297996	0.000352393	0.000232566
GOTERM_BP_FAT	GO:0002040~sprouting angiogenesis	6	5.60748	7.56897e-05	HMGB1, ITGA5, PTGS2, FGF2, RHOA, VEGFA	105	70	16650	13.5918	0.308471	0.000367001	0.000242207
GOTERM_BP_FAT	GO:0045055~regulated exocytosis	10	9.34579	7.99677e-05	APP, TGFB1, ALB, FN1, F2RL1, ACTN4, KNG1, PIK3CG, SOD1, VEGFA	105	288	16650	5.50595	0.322739	0.000387358	0.000255642
GOTERM_BP_FAT	GO:0070232~regulation of T cell apoptotic process	5	4.6729	8.09577e-05	RIPK3, CCL5, HIF1A, TP53, ICAM1	105	37	16650	21.4286	0.325999	0.000391376	0.000258294
GOTERM_BP_FAT	GO:0007431~salivary gland development	5	4.6729	8.09577e-05	IL6, XBP1, TGFB1, TNF, EGFR	105	37	16650	21.4286	0.325999	0.000391376	0.000258294
GOTERM_BP_FAT	GO:0045342~MHC class II biosynthetic process	4	3.73832	8.19687e-05	IL10, XBP1, IFNG, TLR4	105	14	16650	45.3061	0.329311	0.000395087	0.000260743
GOTERM_BP_FAT	GO:0071801~regulation of podosome assembly	4	3.73832	8.19687e-05	CSF2, IL5, SRC, TNF	105	14	16650	45.3061	0.329311	0.000395087	0.000260743
GOTERM_BP_FAT	GO:0042362~fat-soluble vitamin biosynthetic process	4	3.73832	8.19687e-05	IFNG, IL1B, TNF, NFKB1	105	14	16650	45.3061	0.329311	0.000395087	0.000260743
GOTERM_BP_FAT	GO:0009267~cellular response to starvation	7	6.54206	8.33393e-05	XBP1, JUN, ALB, BCL2, GLUL, TP53, NFE2L2	105	115	16650	9.65217	0.333776	0.000400505	0.000264319
GOTERM_BP_FAT	GO:0044259~multicellular organismal macromolecule metabolic process	7	6.54206	8.33393e-05	IL6, TGFB1, MMP2, CCL2, F2, HIF1A, MMP9	105	115	16650	9.65217	0.333776	0.000400505	0.000264319
GOTERM_BP_FAT	GO:0034767~positive regulation of ion transmembrane transport	7	6.54206	8.33393e-05	CXCL10, CXCL11, CXCR3, BAX, ACTN4, PLCG1, F2	105	115	16650	9.65217	0.333776	0.000400505	0.000264319
GOTERM_BP_FAT	GO:0046634~regulation of alpha-beta T cell activation	6	5.60748	8.66404e-05	IL6, IFNG, IL18, HMGB1, AGER, CD55	105	72	16650	13.2143	0.344408	0.000415959	0.000274518
GOTERM_BP_FAT	GO:0097659~nucleic acid-templated transcription	42	39.2523	8.72525e-05	APP, CALCA, SRC, HMGB1, FGF2, HIF1A, TNF, AGER, RELA, EGFR, INS, ICAM1, CXCR3, ELANE, IL10, XBP1, JUN, TGFB1, RIPK3, IFNB1, IL18, MAPK14, SOD2, IL2, NFKB1, KLF2, VEGFA, IL1A, CXCL10, IL6, IL5, IFNG, IRF3, IL1B, F2RL1, EZR, TP53, TLR4, TLR3, HSPA1A, NFE2L2, TLR2	105	3771	16650	1.76611	0.346361	0.000418486	0.000276185
GOTERM_BP_FAT	GO:0043029~T cell homeostasis	5	4.6729	9.00495e-05	TGFB1, RIPK3, IL2RA, BCL2, BAX	105	38	16650	20.8647	0.35521	0.000431052	0.000284479
GOTERM_BP_FAT	GO:0031343~positive regulation of cell killing	5	4.6729	9.00495e-05	IFNG, NOS2, F2RL1, CCL2, B2M	105	38	16650	20.8647	0.35521	0.000431052	0.000284479
GOTERM_BP_FAT	GO:0050851~antigen receptor-mediated signaling pathway	9	8.41121	9.11029e-05	IFNG, BCL2, BAX, FYN, PLCG1, PIK3CB, EZR, RELA, NFKB1	105	228	16650	6.2594	0.358512	0.000435667	0.000287524
GOTERM_BP_FAT	GO:0006275~regulation of DNA replication	7	6.54206	9.1709e-05	IL3, IL6, JUN, TGFB1, CSF2, EGFR, INS	105	117	16650	9.48718	0.360404	0.000437706	0.00028887
GOTERM_BP_FAT	GO:0015758~glucose transport	7	6.54206	9.1709e-05	IL1B, PTPN11, EZR, MAPK14, TNF, NFE2L2, INS	105	117	16650	9.48718	0.360404	0.000437706	0.00028887
GOTERM_BP_FAT	GO:0007584~response to nutrient	8	7.47664	9.80955e-05	CXCL10, XBP1, TGFB1, CCL2, SOD2, PTGS2, RELA, EGFR	105	171	16650	7.41855	0.380004	0.000467729	0.000308684
GOTERM_BP_FAT	GO:0043087~regulation of GTPase activity	15	14.0187	9.87968e-05	JUN, CSF2, FGF2, EGFR, IL2, PTK2, ICAM1, SOD1, IL3, IL5, IL2RA, CCL5, CCL4, CCL2, FYN	105	691	16650	3.44222	0.38212	0.000470613	0.000310587
GOTERM_BP_FAT	GO:0032715~negative regulation of interleukin-6 production	5	4.6729	9.98612e-05	IL10, GHRL, TNF, TLR4, KLF2	105	39	16650	20.3297	0.385317	0.000474292	0.000313015
GOTERM_BP_FAT	GO:0033628~regulation of cell adhesion mediated by integrin	5	4.6729	9.98612e-05	PLAU, CCL5, PTPN11, PTK2, PIK3CG	105	39	16650	20.3297	0.385317	0.000474292	0.000313015
GOTERM_BP_FAT	GO:0030890~positive regulation of B cell proliferation	5	4.6729	9.98612e-05	IL5, BCL2, MIF, TLR4, IL2	105	39	16650	20.3297	0.385317	0.000474292	0.000313015
GOTERM_BP_FAT	GO:0015749~monosaccharide transport	7	6.54206	0.000100735	IL1B, PTPN11, EZR, MAPK14, TNF, NFE2L2, INS	105	119	16650	9.32773	0.387928	0.00047751	0.000315139
GOTERM_BP_FAT	GO:0008645~hexose transport	7	6.54206	0.000100735	IL1B, PTPN11, EZR, MAPK14, TNF, NFE2L2, INS	105	119	16650	9.32773	0.387928	0.00047751	0.000315139
GOTERM_BP_FAT	GO:0006986~response to unfolded protein	8	7.47664	0.000101739	XBP1, CXCL8, IFNG, BAX, CCL2, HSPD1, HSPA1A, NFE2L2	105	172	16650	7.37542	0.390915	0.000481148	0.00031754
GOTERM_BP_FAT	GO:0071800~podosome assembly	4	3.73832	0.000101996	CSF2, IL5, SRC, TNF	105	15	16650	42.2857	0.391678	0.000481148	0.00031754
GOTERM_BP_FAT	GO:0034616~response to laminar fluid shear stress	4	3.73832	0.000101996	XBP1, TGFB1, KLF2, NFE2L2	105	15	16650	42.2857	0.391678	0.000481148	0.00031754
GOTERM_BP_FAT	GO:0034349~glial cell apoptotic process	4	3.73832	0.000101996	CASP3, PRKCD, CCL2, TP53	105	15	16650	42.2857	0.391678	0.000481148	0.00031754
GOTERM_BP_FAT	GO:1904707~positive regulation of vascular smooth muscle cell proliferation	4	3.73832	0.000101996	IL10, XBP1, MMP2, MMP9	105	15	16650	42.2857	0.391678	0.000481148	0.00031754
GOTERM_BP_FAT	GO:0019932~second-messenger-mediated signaling	9	8.41121	0.000105914	CXCL10, CXCL11, CXCL8, NOS2, CXCR3, CCL4, PLCG1, CCR5, EGFR	105	233	16650	6.12508	0.403184	0.000499148	0.000329419
GOTERM_BP_FAT	GO:0034284~response to monosaccharide	8	7.47664	0.000109356	XBP1, TGFB1, CASP3, SOD2, PTGS2, GLUL, HIF1A, ICAM1	105	174	16650	7.29064	0.413112	0.000514871	0.000339796
GOTERM_BP_FAT	GO:2000401~regulation of lymphocyte migration	5	4.6729	0.000110427	CXCL10, RIPK3, CCL5, CCL4, CCL2	105	40	16650	19.8214	0.416166	0.000518535	0.000342214
GOTERM_BP_FAT	GO:0032355~response to estradiol	7	6.54206	0.000110453	IL10, IL6, TGFB1, AIFM1, CASP3, PTGS2, EGFR	105	121	16650	9.17355	0.416242	0.000518535	0.000342214
GOTERM_BP_FAT	GO:0034764~positive regulation of transmembrane transport	7	6.54206	0.000110453	CXCL10, CXCL11, CXCR3, BAX, ACTN4, PLCG1, F2	105	121	16650	9.17355	0.416242	0.000518535	0.000342214
GOTERM_BP_FAT	GO:0046136~positive regulation of vitamin metabolic process	3	2.80374	0.000115455	IFNG, IL1B, TNF	105	3	16650	158.571	0.430299	0.000540453	0.000356679
GOTERM_BP_FAT	GO:0060557~positive regulation of vitamin D biosynthetic process	3	2.80374	0.000115455	IFNG, IL1B, TNF	105	3	16650	158.571	0.430299	0.000540453	0.000356679
GOTERM_BP_FAT	GO:0060559~positive regulation of calcidiol 1-monooxygenase activity	3	2.80374	0.000115455	IFNG, IL1B, TNF	105	3	16650	158.571	0.430299	0.000540453	0.000356679
GOTERM_BP_FAT	GO:0050777~negative regulation of immune response	7	6.54206	0.000120903	IL10, TGFB1, IFNB1, IL2RA, TNF, CD55, INS	105	123	16650	9.02439	0.445226	0.000565412	0.000373151
GOTERM_BP_FAT	GO:2001235~positive regulation of apoptotic signaling pathway	8	7.47664	0.000121647	RIPK3, IFNB1, PRKCD, BCL2, BAX, TP53, MMP9, SOD1	105	177	16650	7.16707	0.447234	0.000567878	0.000374779
GOTERM_BP_FAT	GO:0032570~response to progesterone	5	4.6729	0.00012178	TGFB1, SRC, CCL2, RELA, TLR2	105	41	16650	19.338	0.447592	0.000567878	0.000374779
GOTERM_BP_FAT	GO:0097028~dendritic cell differentiation	5	4.6729	0.00012178	TGFB1, CSF2, F2RL1, HMGB1, AGER	105	41	16650	19.338	0.447592	0.000567878	0.000374779
GOTERM_BP_FAT	GO:0030949~positive regulation of vascular endothelial growth factor receptor signaling pathway	4	3.73832	0.000124964	IL1B, ITGA5, HIF1A, VEGFA	105	16	16650	39.6429	0.456099	0.000581614	0.000383844
GOTERM_BP_FAT	GO:0090026~positive regulation of monocyte chemotaxis	4	3.73832	0.000124964	CXCL10, CCL5, CCL2, HMGB1	105	16	16650	39.6429	0.456099	0.000581614	0.000383844
GOTERM_BP_FAT	GO:0043393~regulation of protein binding	8	7.47664	0.000125985	IL10, APP, SRC, PRKCD, BCL2, BAX, B2M, MMP9	105	178	16650	7.12681	0.458798	0.000585805	0.000386609
GOTERM_BP_FAT	GO:0048729~tissue morphogenesis	14	13.0841	0.000131332	IL10, TGFB1, SRC, FGF2, HIF1A, TNF, RHOA, EGFR, VEGFA, IL6, BCL2, BAX, ITGA5, EZR	105	622	16650	3.56913	0.472721	0.000610088	0.000402636
GOTERM_BP_FAT	GO:0071383~cellular response to steroid hormone stimulus	9	8.41121	0.00013373	IL6, TGFB1, AIFM1, IFNB1, SRC, CCL2, DEFA1, EGFR, AQP1	105	241	16650	5.92175	0.478845	0.000620633	0.000409595
GOTERM_BP_FAT	GO:0046677~response to antibiotic	5	4.6729	0.000133956	IL6, CASP3, CCL2, TP53, SOD1	105	42	16650	18.8776	0.479419	0.00062109	0.000409896
GOTERM_BP_FAT	GO:0038093~Fc receptor signaling pathway	9	8.41121	0.000141553	JUN, SRC, PRKCD, FYN, PLCG1, PIK3CB, RELA, PTK2, NFKB1	105	243	16650	5.87302	0.498343	0.000655693	0.000432733
GOTERM_BP_FAT	GO:0060333~interferon-gamma-mediated signaling pathway	6	5.60748	0.000143102	IFNG, IRF3, IFNGR1, PRKCD, B2M, ICAM1	105	80	16650	11.8929	0.502114	0.000662236	0.000437052
GOTERM_BP_FAT	GO:0044092~negative regulation of molecular function	19	17.757	0.000146614	IL10, APP, JUN, SRC, PRKCD, AGER, TNF, MMP9, KNG1, NFKB1, AQP1, INS, VEGFA, PTPA, IL6, IL1B, BAX, TP53, B2M	105	1100	16650	2.73896	0.510563	0.000677598	0.000447189
GOTERM_BP_FAT	GO:0006869~lipid transport	10	9.34579	0.000146699	ABCB1, NOS2, IL1B, ALB, SIGMAR1, PRKCD, PTPN11, GHRL, MIF, NFKB1	105	312	16650	5.08242	0.510768	0.000677598	0.000447189
GOTERM_BP_FAT	GO:0032608~interferon-beta production	5	4.6729	0.000146989	IRF3, HMGB1, TLR4, TLR3, TLR2	105	43	16650	18.4385	0.511458	0.000677804	0.000447325
GOTERM_BP_FAT	GO:0010563~negative regulation of phosphorus metabolic process	13	12.1495	0.000147161	XBP1, JUN, TGFB1, PRKCD, TNF, IL2, PTPA, IL6, IL1B, BAX, F2RL1, EZR, TLR4	105	544	16650	3.78939	0.511868	0.000677804	0.000447325
GOTERM_BP_FAT	GO:0045936~negative regulation of phosphate metabolic process	13	12.1495	0.000147161	XBP1, JUN, TGFB1, PRKCD, TNF, IL2, PTPA, IL6, IL1B, BAX, F2RL1, EZR, TLR4	105	544	16650	3.78939	0.511868	0.000677804	0.000447325
GOTERM_BP_FAT	GO:0007254~JNK cascade	8	7.47664	0.000149602	IL1A, IL1B, F2RL1, HMGB1, AGER, TNF, TLR4, TLR3	105	183	16650	6.93208	0.51764	0.000688395	0.000454315
GOTERM_BP_FAT	GO:0031649~heat generation	4	3.73832	0.000151054	IL1A, IL1B, PTGS2, TNF	105	17	16650	37.3109	0.521041	0.00069116	0.00045614
GOTERM_BP_FAT	GO:0006925~inflammatory cell apoptotic process	4	3.73832	0.000151054	IL6, IFNG, IRF3, CCL5	105	17	16650	37.3109	0.521041	0.00069116	0.00045614
GOTERM_BP_FAT	GO:0071675~regulation of mononuclear cell migration	4	3.73832	0.000151054	TGFB1, CCL5, CCL2, TNF	105	17	16650	37.3109	0.521041	0.00069116	0.00045614
GOTERM_BP_FAT	GO:0048305~immunoglobulin secretion	4	3.73832	0.000151054	IL6, XBP1, IL5, IL2	105	17	16650	37.3109	0.521041	0.00069116	0.00045614
GOTERM_BP_FAT	GO:0042523~positive regulation of tyrosine phosphorylation of Stat5 protein	4	3.73832	0.000151054	IL3, CSF2, FYN, IL2	105	17	16650	37.3109	0.521041	0.00069116	0.00045614
GOTERM_BP_FAT	GO:2000811~negative regulation of anoikis	4	3.73832	0.000151054	SRC, BCL2, ITGA5, PTK2	105	17	16650	37.3109	0.521041	0.00069116	0.00045614
GOTERM_BP_FAT	GO:0021782~glial cell development	6	5.60748	0.000151766	TGFB1, AGER, TLR4, EGFR, SOD1, TLR2	105	81	16650	11.746	0.522701	0.000693117	0.000457431
GOTERM_BP_FAT	GO:0022602~ovulation cycle process	6	5.60748	0.000151766	SGPL1, BCL2, BAX, ICAM1, SOD1, VEGFA	105	81	16650	11.746	0.522701	0.000693117	0.000457431
GOTERM_BP_FAT	GO:0060322~head development	15	14.0187	0.000152082	APP, TGFB1, SRC, MMP2, PTPN11, FGF2, HIF1A, RHOA, EGFR, AQP1, SGPL1, CASP3, BCL2, BAX, FYN	105	720	16650	3.30357	0.523435	0.000693909	0.000457954
GOTERM_BP_FAT	GO:0043547~positive regulation of GTPase activity	14	13.0841	0.000158632	JUN, CSF2, FGF2, EGFR, IL2, PTK2, ICAM1, IL3, IL5, IL2RA, CCL5, CCL4, CCL2, FYN	105	634	16650	3.50158	0.538408	0.000723118	0.000477231
GOTERM_BP_FAT	GO:0050766~positive regulation of phagocytosis	5	4.6729	0.000160916	IL1B, F2RL1, CCL2, TNF, MBL2	105	44	16650	18.0195	0.543517	0.000731475	0.000482747
GOTERM_BP_FAT	GO:0002889~regulation of immunoglobulin mediated immune response	5	4.6729	0.000160916	IL10, TGFB1, IFNG, TNF, IL2	105	44	16650	18.0195	0.543517	0.000731475	0.000482747
GOTERM_BP_FAT	GO:0002712~regulation of B cell mediated immunity	5	4.6729	0.000160916	IL10, TGFB1, IFNG, TNF, IL2	105	44	16650	18.0195	0.543517	0.000731475	0.000482747
GOTERM_BP_FAT	GO:0001889~liver development	7	6.54206	0.000163807	IL10, XBP1, JUN, TGFB1, SOD2, RELA, EGFR	105	130	16650	8.53846	0.549906	0.000743927	0.000490964
GOTERM_BP_FAT	GO:0045833~negative regulation of lipid metabolic process	6	5.60748	0.000170293	IL1B, TNF, NFKB1, PIK3CG, SOD1, INS	105	83	16650	11.463	0.563911	0.000771226	0.000508981
GOTERM_BP_FAT	GO:0051781~positive regulation of cell division	6	5.60748	0.000170293	IL1A, TGFB1, IL1B, FGF2, RHOA, VEGFA	105	83	16650	11.463	0.563911	0.000771226	0.000508981
GOTERM_BP_FAT	GO:1901343~negative regulation of vasculature development	6	5.60748	0.000170293	CXCL10, IFNG, CXCR3, CCL2, GHRL, RHOA	105	83	16650	11.463	0.563911	0.000771226	0.000508981
GOTERM_BP_FAT	GO:0045981~positive regulation of nucleotide metabolic process	7	6.54206	0.00017081	CXCL10, CXCL11, CALCA, NOS2, CXCR3, HIF1A, INS	105	131	16650	8.47328	0.565009	0.000772133	0.000509579
GOTERM_BP_FAT	GO:1900544~positive regulation of purine nucleotide metabolic process	7	6.54206	0.00017081	CXCL10, CXCL11, CALCA, NOS2, CXCR3, HIF1A, INS	105	131	16650	8.47328	0.565009	0.000772133	0.000509579
GOTERM_BP_FAT	GO:0001933~negative regulation of protein phosphorylation	11	10.2804	0.000173773	IL6, XBP1, JUN, TGFB1, IL1B, PRKCD, BAX, F2RL1, EZR, TLR4, IL2	105	393	16650	4.43839	0.571244	0.000784795	0.000517936
GOTERM_BP_FAT	GO:0046626~regulation of insulin receptor signaling pathway	5	4.6729	0.000175771	SRC, IL1B, PRKCD, RELA, INS	105	45	16650	17.619	0.5754	0.000790889	0.000521958
GOTERM_BP_FAT	GO:0006984~ER-nucleus signaling pathway	5	4.6729	0.000175771	XBP1, CXCL8, CCL2, TP53, NFE2L2	105	45	16650	17.619	0.5754	0.000790889	0.000521958
GOTERM_BP_FAT	GO:0032653~regulation of interleukin-10 production	5	4.6729	0.000175771	HMGB1, AGER, TLR4, HSPD1, TLR2	105	45	16650	17.619	0.5754	0.000790889	0.000521958
GOTERM_BP_FAT	GO:0032648~regulation of interferon-beta production	5	4.6729	0.000175771	IRF3, HMGB1, TLR4, TLR3, TLR2	105	45	16650	17.619	0.5754	0.000790889	0.000521958
GOTERM_BP_FAT	GO:0032869~cellular response to insulin stimulus	8	7.47664	0.00017669	XBP1, SRC, IL1B, PRKCD, CCL2, PTPN11, RELA, INS	105	188	16650	6.74772	0.577297	0.000793558	0.000523719
GOTERM_BP_FAT	GO:0035966~response to topologically incorrect protein	8	7.47664	0.00017669	XBP1, CXCL8, IFNG, BAX, CCL2, HSPD1, HSPA1A, NFE2L2	105	188	16650	6.74772	0.577297	0.000793558	0.000523719
GOTERM_BP_FAT	GO:0030879~mammary gland development	7	6.54206	0.000178048	XBP1, TGFB1, SRC, BAX, HIF1A, FGF2, VEGFA	105	132	16650	8.40909	0.580086	0.000798186	0.000526773
GOTERM_BP_FAT	GO:0030968~endoplasmic reticulum unfolded protein response	7	6.54206	0.000178048	XBP1, CXCL8, IFNG, BAX, CCL2, HSPA1A, NFE2L2	105	132	16650	8.40909	0.580086	0.000798186	0.000526773
GOTERM_BP_FAT	GO:0071674~mononuclear cell migration	4	3.73832	0.000180443	TGFB1, CCL5, CCL2, TNF	105	18	16650	35.2381	0.584959	0.000807436	0.000532878
GOTERM_BP_FAT	GO:0002902~regulation of B cell apoptotic process	4	3.73832	0.000180443	IL10, BAX, MIF, IL2	105	18	16650	35.2381	0.584959	0.000807436	0.000532878
GOTERM_BP_FAT	GO:0044708~single-organism behavior	11	10.2804	0.000181052	APP, IL6, JUN, CASP3, BCL2, FYN, GHRL, ITGA5, PTGS2, HIF1A, EGFR	105	395	16650	4.41591	0.58619	0.000809421	0.000534188
GOTERM_BP_FAT	GO:2000027~regulation of organ morphogenesis	9	8.41121	0.000181592	XBP1, TGFB1, IFNG, BCL2, BAX, TNF, FGF2, RHOA, VEGFA	105	252	16650	5.66327	0.587277	0.000811088	0.000535288
GOTERM_BP_FAT	GO:0061008~hepaticobiliary system development	7	6.54206	0.000185526	IL10, XBP1, JUN, TGFB1, SOD2, RELA, EGFR	105	133	16650	8.34586	0.595115	0.000826388	0.000545385
GOTERM_BP_FAT	GO:0044236~multicellular organism metabolic process	7	6.54206	0.000185526	IL6, TGFB1, MMP2, CCL2, F2, HIF1A, MMP9	105	133	16650	8.34586	0.595115	0.000826388	0.000545385
GOTERM_BP_FAT	GO:0022408~negative regulation of cell-cell adhesion	7	6.54206	0.000185526	IL10, TGFB1, IFNB1, IL2RA, PRKCD, HMGB1, PTK2	105	133	16650	8.34586	0.595115	0.000826388	0.000545385
GOTERM_BP_FAT	GO:0043525~positive regulation of neuron apoptotic process	5	4.6729	0.000191592	JUN, AIFM1, CASP3, BAX, TP53	105	46	16650	17.236	0.60691	0.00085185	0.00056219
GOTERM_BP_FAT	GO:0006921~cellular component disassembly involved in execution phase of apoptosis	5	4.6729	0.000191592	CASP3, PRKCD, BAX, HMGB1, PTK2	105	46	16650	17.236	0.60691	0.00085185	0.00056219
GOTERM_BP_FAT	GO:0034620~cellular response to unfolded protein	7	6.54206	0.000201226	XBP1, CXCL8, IFNG, BAX, CCL2, HSPA1A, NFE2L2	105	135	16650	8.22222	0.624941	0.000893867	0.000589919
GOTERM_BP_FAT	GO:0035306~positive regulation of dephosphorylation	5	4.6729	0.000208415	PTPA, TGFB1, IFNG, RIPK3, PRKCD	105	47	16650	16.8693	0.637855	0.000924959	0.000610439
GOTERM_BP_FAT	GO:0044712~single-organism catabolic process	16	14.9533	0.000212192	XBP1, NOS2, MMP2, PRKCD, HMGB1, HIF1A, TNF, MMP9, PIK3CG, INS, SGPL1, IL1B, NEU1, PLCG1, GLUL, NFE2L2	105	837	16650	3.03123	0.644462	0.000940867	0.000620937
GOTERM_BP_FAT	GO:0007044~cell-substrate junction assembly	6	5.60748	0.000212487	SRC, BCL2, FN1, ITGA5, PTK2, VEGFA	105	87	16650	10.936	0.644973	0.000941319	0.000621236
GOTERM_BP_FAT	GO:0040013~negative regulation of locomotion	9	8.41121	0.000213139	TGFB1, BCL2, CCL2, GHRL, HMGB1, FGF2, RHOA, ELANE, NFE2L2	105	258	16650	5.53156	0.646099	0.000943225	0.000622493
GOTERM_BP_FAT	GO:0035994~response to muscle stretch	4	3.73832	0.000213305	JUN, MAPK14, RELA, NFKB1	105	19	16650	33.3835	0.646384	0.000943225	0.000622493
GOTERM_BP_FAT	GO:0022604~regulation of cell morphogenesis	13	12.1495	0.00021938	TGFB1, SRC, FN1, ACTN4, F2, RHOA, PTK2, ICAM1, VEGFA, IL6, CCL2, FYN, EZR	105	568	16650	3.62928	0.656702	0.00096921	0.000639643
GOTERM_BP_FAT	GO:0045661~regulation of myoblast differentiation	5	4.6729	0.000226276	CXCL10, TGFB1, IL18, MAPK14, TNF	105	48	16650	16.5179	0.668049	0.000998771	0.000659152
GOTERM_BP_FAT	GO:0044283~small molecule biosynthetic process	12	11.215	0.000234372	IL6, XBP1, IFNG, IL1B, MIF, PTGS2, GLUL, TNF, FGF2, NFKB1, SOD1, INS	105	488	16650	3.8993	0.680892	0.00103357	0.000682117
GOTERM_BP_FAT	GO:0045444~fat cell differentiation	8	7.47664	0.000235391	IL6, XBP1, TGFB1, MAPK14, SOD2, PTGS2, TNF, INS	105	197	16650	6.43945	0.682474	0.00103713	0.000684465
GOTERM_BP_FAT	GO:1904019~epithelial cell apoptotic process	6	5.60748	0.000236357	IL10, IL6, XBP1, PIK3CG, ICAM1, NFE2L2	105	89	16650	10.6902	0.683965	0.00104044	0.000686651
GOTERM_BP_FAT	GO:0000904~cell morphogenesis involved in differentiation	15	14.0187	0.000241559	APP, TGFB1, SRC, FN1, PTPN11, ACTN4, HIF1A, RHOA, PTK2, SOD1, VEGFA, CASP3, BCL2, FYN, EZR	105	753	16650	3.15879	0.691879	0.00106238	0.000701133
GOTERM_BP_FAT	GO:0001501~skeletal system development	12	11.215	0.000242751	SGPL1, TGFB1, SRC, MMP2, PTPN11, GHRL, MAPK14, HIF1A, FGF2, MMP9, RELA, RHOA	105	490	16650	3.88338	0.693663	0.00106666	0.000703956
GOTERM_BP_FAT	GO:0035272~exocrine system development	5	4.6729	0.000245214	IL6, XBP1, TGFB1, TNF, EGFR	105	49	16650	16.1808	0.697318	0.00107554	0.000709817
GOTERM_BP_FAT	GO:0035094~response to nicotine	5	4.6729	0.000245214	CASP3, BCL2, TNF, RELA, NFKB1	105	49	16650	16.1808	0.697318	0.00107554	0.000709817
GOTERM_BP_FAT	GO:0008585~female gonad development	6	5.60748	0.00024903	SGPL1, BCL2, BAX, ICAM1, SOD1, VEGFA	105	90	16650	10.5714	0.702896	0.00108689	0.00071731
GOTERM_BP_FAT	GO:0070588~calcium ion transmembrane transport	9	8.41121	0.000249057	CXCL10, CXCL11, TGFB1, CXCR3, BAX, PLCG1, CCR5, F2, FGF2	105	264	16650	5.40584	0.702936	0.00108689	0.00071731
GOTERM_BP_FAT	GO:0006898~receptor-mediated endocytosis	10	9.34579	0.000249225	CALCA, CXCL8, SRC, ALB, MRC1, PIK3CB, EZR, B2M, EGFR, VEGFA	105	335	16650	4.73348	0.703179	0.00108689	0.00071731
GOTERM_BP_FAT	GO:0042522~regulation of tyrosine phosphorylation of Stat5 protein	4	3.73832	0.000249809	IL3, CSF2, FYN, IL2	105	20	16650	31.7143	0.704023	0.00108689	0.00071731
GOTERM_BP_FAT	GO:0032682~negative regulation of chemokine production	4	3.73832	0.000249809	IL10, IL6, F2RL1, ELANE	105	20	16650	31.7143	0.704023	0.00108689	0.00071731
GOTERM_BP_FAT	GO:0001783~B cell apoptotic process	4	3.73832	0.000249809	IL10, BAX, MIF, IL2	105	20	16650	31.7143	0.704023	0.00108689	0.00071731
GOTERM_BP_FAT	GO:0090312~positive regulation of protein deacetylation	4	3.73832	0.000249809	TGFB1, RIPK3, TP53, VEGFA	105	20	16650	31.7143	0.704023	0.00108689	0.00071731
GOTERM_BP_FAT	GO:1902895~positive regulation of pri-miRNA transcription from RNA polymerase II promoter	4	3.73832	0.000249809	JUN, TGFB1, HIF1A, RELA	105	20	16650	31.7143	0.704023	0.00108689	0.00071731
GOTERM_BP_FAT	GO:0042359~vitamin D metabolic process	4	3.73832	0.000249809	IFNG, IL1B, TNF, NFKB1	105	20	16650	31.7143	0.704023	0.00108689	0.00071731
GOTERM_BP_FAT	GO:0016070~RNA metabolic process	47	43.9252	0.000260933	IFITM3, APP, CALCA, CXCL8, SRC, HMGB1, FGF2, HIF1A, TNF, AGER, RELA, EGFR, INS, ICAM1, CCL5, CXCR3, CCL4, ELANE, IL10, XBP1, JUN, TGFB1, RIPK3, IFNB1, IL18, ACTN4, MAPK14, SOD2, IL2, NFKB1, KLF2, VEGFA, IL1A, CXCL10, IL6, IL5, IFNG, IRF3, IL1B, F2RL1, EZR, TP53, TLR4, TLR3, HSPA1A, NFE2L2, TLR2	105	4648	16650	1.60345	0.719644	0.00113428	0.000748583
GOTERM_BP_FAT	GO:0090303~positive regulation of wound healing	5	4.6729	0.000265265	XBP1, HMGB1, F2, TLR4, NFE2L2	105	50	16650	15.8571	0.725501	0.00115208	0.000760331
GOTERM_BP_FAT	GO:0035295~tube development	13	12.1495	0.000265634	TGFB1, CXCL8, SRC, HMGB1, FGF2, HIF1A, TNF, RHOA, EGFR, KLF2, VEGFA, BCL2, BAX	105	580	16650	3.55419	0.725994	0.00115266	0.000760712
GOTERM_BP_FAT	GO:0032368~regulation of lipid transport	6	5.60748	0.00027592	IL1B, PRKCD, PTPN11, GHRL, MIF, NFKB1	105	92	16650	10.3416	0.739394	0.00119623	0.000789465
GOTERM_BP_FAT	GO:0031327~negative regulation of cellular biosynthetic process	22	20.5607	0.000281292	IL10, IFITM3, XBP1, JUN, CALCA, TGFB1, SRC, HMGB1, TNF, EGFR, RELA, NFKB1, INS, VEGFA, IL6, IFNG, CCL5, CCL4, GHRL, EZR, TP53, ELANE	105	1480	16650	2.35714	0.746129	0.00121843	0.000804121
GOTERM_BP_FAT	GO:0007548~sex differentiation	9	8.41121	0.000282653	SGPL1, BCL2, BAX, PTPN11, TLR5, TLR3, ICAM1, SOD1, VEGFA	105	269	16650	5.30536	0.747807	0.00122324	0.000807292
GOTERM_BP_FAT	GO:0051926~negative regulation of calcium ion transport	5	4.6729	0.000286467	CALCA, TGFB1, BCL2, PTGS2, ICAM1	105	51	16650	15.5462	0.752453	0.00123536	0.00081529
GOTERM_BP_FAT	GO:0043550~regulation of lipid kinase activity	5	4.6729	0.000286467	TGFB1, SRC, F2, FGF2, PTK2	105	51	16650	15.5462	0.752453	0.00123536	0.00081529
GOTERM_BP_FAT	GO:0045071~negative regulation of viral genome replication	5	4.6729	0.000286467	IFITM3, IFNB1, CCL5, ISG15, TNF	105	51	16650	15.5462	0.752453	0.00123536	0.00081529
GOTERM_BP_FAT	GO:0050810~regulation of steroid biosynthetic process	5	4.6729	0.000286467	IFNG, IL1B, TNF, NFKB1, SOD1	105	51	16650	15.5462	0.752453	0.00123536	0.00081529
GOTERM_BP_FAT	GO:0051043~regulation of membrane protein ectodomain proteolysis	4	3.73832	0.000290124	IL10, IFNG, IL1B, TNF	105	21	16650	30.2041	0.756826	0.00124579	0.000822175
GOTERM_BP_FAT	GO:1902176~negative regulation of oxidative stress-induced intrinsic apoptotic signaling pathway	4	3.73832	0.000290124	SOD2, HIF1A, NFE2L2, INS	105	21	16650	30.2041	0.756826	0.00124579	0.000822175
GOTERM_BP_FAT	GO:1901623~regulation of lymphocyte chemotaxis	4	3.73832	0.000290124	CXCL10, CCL5, CCL4, CCL2	105	21	16650	30.2041	0.756826	0.00124579	0.000822175
GOTERM_BP_FAT	GO:0042177~negative regulation of protein catabolic process	6	5.60748	0.000290164	IL10, NOS2, FYN, RELA, EGFR, INS	105	93	16650	10.2304	0.756874	0.00124579	0.000822175
GOTERM_BP_FAT	GO:0001952~regulation of cell-matrix adhesion	6	5.60748	0.000290164	PLAU, SRC, BCL2, PIK3CB, PTK2, VEGFA	105	93	16650	10.2304	0.756874	0.00124579	0.000822175
GOTERM_BP_FAT	GO:0010629~negative regulation of gene expression	22	20.5607	0.000294492	IFITM3, XBP1, JUN, CALCA, TGFB1, NOS2, SRC, HMGB1, MIF, TNF, EGFR, RELA, NFKB1, VEGFA, IFNG, CCL5, CCL4, FYN, EZR, TP53, CD55, ELANE	105	1485	16650	2.34921	0.761949	0.00126326	0.000833703
GOTERM_BP_FAT	GO:0055123~digestive system development	7	6.54206	0.000296152	XBP1, TGFB1, CXCL8, BCL2, HIF1A, TNF, EGFR	105	145	16650	7.65517	0.763867	0.00126926	0.000837664
GOTERM_BP_FAT	GO:1900542~regulation of purine nucleotide metabolic process	8	7.47664	0.000299927	CXCL10, CXCL11, CALCA, NOS2, CXCR3, HIF1A, INS, VEGFA	105	205	16650	6.18815	0.768173	0.00128431	0.000847596
GOTERM_BP_FAT	GO:0046854~phosphatidylinositol phosphorylation	6	5.60748	0.00030496	PTPN11, FYN, PIK3CB, FGF2, EGFR, PIK3CG	105	94	16650	10.1216	0.773791	0.00130357	0.000860308
GOTERM_BP_FAT	GO:0046545~development of primary female sexual characteristics	6	5.60748	0.00030496	SGPL1, BCL2, BAX, ICAM1, SOD1, VEGFA	105	94	16650	10.1216	0.773791	0.00130357	0.000860308
GOTERM_BP_FAT	GO:0048754~branching morphogenesis of an epithelial tube	7	6.54206	0.000318773	TGFB1, SRC, BCL2, BAX, TNF, FGF2, VEGFA	105	147	16650	7.55102	0.78852	0.00136142	0.000898486
GOTERM_BP_FAT	GO:0035239~tube morphogenesis	10	9.34579	0.000329731	TGFB1, SRC, BCL2, BAX, HIF1A, TNF, FGF2, RHOA, EGFR, VEGFA	105	348	16650	4.55665	0.799521	0.00140699	0.00092856
GOTERM_BP_FAT	GO:1903201~regulation of oxidative stress-induced cell death	5	4.6729	0.000332478	SOD2, HIF1A, SOD1, NFE2L2, INS	105	53	16650	14.9596	0.802188	0.00141623	0.000934659
GOTERM_BP_FAT	GO:0001541~ovarian follicle development	5	4.6729	0.000332478	BCL2, BAX, ICAM1, SOD1, VEGFA	105	53	16650	14.9596	0.802188	0.00141623	0.000934659
GOTERM_BP_FAT	GO:0002719~negative regulation of cytokine production involved in immune response	4	3.73832	0.000334412	IL10, TGFB1, IFNB1, TNF	105	22	16650	28.8312	0.804043	0.00141703	0.000935189
GOTERM_BP_FAT	GO:0090025~regulation of monocyte chemotaxis	4	3.73832	0.000334412	CXCL10, CCL5, CCL2, HMGB1	105	22	16650	28.8312	0.804043	0.00141703	0.000935189
GOTERM_BP_FAT	GO:1990874~vascular smooth muscle cell proliferation	4	3.73832	0.000334412	IL10, XBP1, MMP2, MMP9	105	22	16650	28.8312	0.804043	0.00141703	0.000935189
GOTERM_BP_FAT	GO:1904705~regulation of vascular smooth muscle cell proliferation	4	3.73832	0.000334412	IL10, XBP1, MMP2, MMP9	105	22	16650	28.8312	0.804043	0.00141703	0.000935189
GOTERM_BP_FAT	GO:0045932~negative regulation of muscle contraction	4	3.73832	0.000334412	CALCA, PTGS2, PIK3CG, SOD1	105	22	16650	28.8312	0.804043	0.00141703	0.000935189
GOTERM_BP_FAT	GO:0009110~vitamin biosynthetic process	4	3.73832	0.000334412	IFNG, IL1B, TNF, NFKB1	105	22	16650	28.8312	0.804043	0.00141703	0.000935189
GOTERM_BP_FAT	GO:0030218~erythrocyte differentiation	6	5.60748	0.000336261	CASP3, ISG15, MAPK14, HIF1A, KLF2, VEGFA	105	96	16650	9.91071	0.805802	0.00142363	0.000939544
GOTERM_BP_FAT	GO:0035967~cellular response to topologically incorrect protein	7	6.54206	0.000342727	XBP1, CXCL8, IFNG, BAX, CCL2, HSPA1A, NFE2L2	105	149	16650	7.44966	0.811827	0.00144975	0.00095678
GOTERM_BP_FAT	GO:0042326~negative regulation of phosphorylation	11	10.2804	0.000343767	IL6, XBP1, JUN, TGFB1, IL1B, PRKCD, BAX, F2RL1, EZR, TLR4, IL2	105	428	16650	4.07543	0.812779	0.00145289	0.00095885
GOTERM_BP_FAT	GO:0002064~epithelial cell development	8	7.47664	0.000357096	XBP1, IL1B, F2RL1, EZR, HIF1A, TNF, ICAM1, SOD1	105	211	16650	6.01219	0.824557	0.00150513	0.00099333
GOTERM_BP_FAT	GO:0016444~somatic cell DNA recombination	5	4.6729	0.000357364	TGFB1, IFNG, HMGB1, IL2, HSPD1	105	54	16650	14.6825	0.824786	0.00150513	0.00099333
GOTERM_BP_FAT	GO:0002562~somatic diversification of immune receptors via germline recombination within a single locus	5	4.6729	0.000357364	TGFB1, IFNG, HMGB1, IL2, HSPD1	105	54	16650	14.6825	0.824786	0.00150513	0.00099333
GOTERM_BP_FAT	GO:0050994~regulation of lipid catabolic process	5	4.6729	0.000357364	IL1B, PRKCD, TNF, PIK3CG, INS	105	54	16650	14.6825	0.824786	0.00150513	0.00099333
GOTERM_BP_FAT	GO:0048609~multicellular organismal reproductive process	15	14.0187	0.000359185	APP, TGFB1, SRC, PTPN11, PTGS2, EGFR, ICAM1, SOD1, VEGFA, SGPL1, BCL2, BAX, CCL2, GHRL, CD55	105	783	16650	3.03777	0.826334	0.00151149	0.00099753
GOTERM_BP_FAT	GO:0006140~regulation of nucleotide metabolic process	8	7.47664	0.000367421	CXCL10, CXCL11, CALCA, NOS2, CXCR3, HIF1A, INS, VEGFA	105	212	16650	5.98383	0.833169	0.00154482	0.00101952
GOTERM_BP_FAT	GO:0051591~response to cAMP	6	5.60748	0.000369936	APP, JUN, EZR, RELA, PIK3CG, AQP1	105	98	16650	9.70845	0.835202	0.00155405	0.00102562
GOTERM_BP_FAT	GO:0008406~gonad development	8	7.47664	0.000377984	SGPL1, BCL2, BAX, TLR5, TLR3, ICAM1, SOD1, VEGFA	105	213	16650	5.95573	0.841542	0.00158649	0.00104703
GOTERM_BP_FAT	GO:0042506~tyrosine phosphorylation of Stat5 protein	4	3.73832	0.000382832	IL3, CSF2, FYN, IL2	105	23	16650	27.5776	0.845243	0.00159995	0.00105591
GOTERM_BP_FAT	GO:0050995~negative regulation of lipid catabolic process	4	3.73832	0.000382832	IL1B, TNF, PIK3CG, INS	105	23	16650	27.5776	0.845243	0.00159995	0.00105591
GOTERM_BP_FAT	GO:0042026~protein refolding	4	3.73832	0.000382832	CRYAA, B2M, HSPD1, HSPA1A	105	23	16650	27.5776	0.845243	0.00159995	0.00105591
GOTERM_BP_FAT	GO:0002407~dendritic cell chemotaxis	4	3.73832	0.000382832	CCL5, HMGB1, CCR5, PIK3CG	105	23	16650	27.5776	0.845243	0.00159995	0.00105591
GOTERM_BP_FAT	GO:0046688~response to copper ion	4	3.73832	0.000382832	IL1A, AQP1, ICAM1, SOD1	105	23	16650	27.5776	0.845243	0.00159995	0.00105591
GOTERM_BP_FAT	GO:2001244~positive regulation of intrinsic apoptotic signaling pathway	5	4.6729	0.000383555	RIPK3, BCL2, BAX, TP53, SOD1	105	55	16650	14.4156	0.845787	0.00160023	0.00105609
GOTERM_BP_FAT	GO:0019731~antibacterial humoral response	5	4.6729	0.000383555	APP, CALCA, DEFA1, B2M, CAMP	105	55	16650	14.4156	0.845787	0.00160023	0.00105609
GOTERM_BP_FAT	GO:0006066~alcohol metabolic process	9	8.41121	0.000387689	APP, TTR, IFNG, IL1B, PLCG1, TNF, FGF2, NFKB1, SOD1	105	282	16650	5.06079	0.848864	0.00161609	0.00106656
GOTERM_BP_FAT	GO:0042594~response to starvation	7	6.54206	0.000394858	XBP1, JUN, ALB, BCL2, GLUL, TP53, NFE2L2	105	153	16650	7.2549	0.854055	0.00164457	0.00108535
GOTERM_BP_FAT	GO:0032504~multicellular organism reproduction	15	14.0187	0.0004029	APP, TGFB1, SRC, PTPN11, PTGS2, EGFR, ICAM1, SOD1, VEGFA, SGPL1, BCL2, BAX, CCL2, GHRL, CD55	105	792	16650	3.00325	0.859666	0.00167663	0.00110651
GOTERM_BP_FAT	GO:1903036~positive regulation of response to wounding	5	4.6729	0.00041109	XBP1, HMGB1, F2, TLR4, NFE2L2	105	56	16650	14.1582	0.865158	0.00170925	0.00112804
GOTERM_BP_FAT	GO:0042391~regulation of membrane potential	10	9.34579	0.000422099	IL6, JUN, IFNG, SRC, BCL2, BAX, GHRL, SOD2, B2M, SOD1	105	360	16650	4.40476	0.872205	0.00175353	0.00115726
GOTERM_BP_FAT	GO:0045216~cell-cell junction organization	8	7.47664	0.00043451	TGFB1, SRC, BCL2, ACTN4, TNF, PTK2, RHOA, VEGFA	105	218	16650	5.81913	0.879707	0.00180169	0.00118905
GOTERM_BP_FAT	GO:0045137~development of primary sexual characteristics	8	7.47664	0.00043451	SGPL1, BCL2, BAX, TLR5, TLR3, ICAM1, SOD1, VEGFA	105	218	16650	5.81913	0.879707	0.00180169	0.00118905
GOTERM_BP_FAT	GO:0010558~negative regulation of macromolecule biosynthetic process	21	19.6262	0.000435396	IL10, IFITM3, XBP1, JUN, CALCA, TGFB1, SRC, HMGB1, TNF, EGFR, RELA, NFKB1, VEGFA, IL6, IFNG, CCL5, CCL4, GHRL, EZR, TP53, ELANE	105	1418	16650	2.34838	0.880226	0.00180169	0.00118905
GOTERM_BP_FAT	GO:0042119~neutrophil activation	4	3.73832	0.000435542	CXCL8, CCL5, PRKCD, F2RL1	105	24	16650	26.4286	0.880311	0.00180169	0.00118905
GOTERM_BP_FAT	GO:0045662~negative regulation of myoblast differentiation	4	3.73832	0.000435542	CXCL10, TGFB1, IL18, TNF	105	24	16650	26.4286	0.880311	0.00180169	0.00118905
GOTERM_BP_FAT	GO:0007611~learning or memory	8	7.47664	0.00045893	APP, JUN, CASP3, FYN, ITGA5, PTGS2, HIF1A, EGFR	105	220	16650	5.76623	0.893209	0.00189683	0.00125184
GOTERM_BP_FAT	GO:0046165~alcohol biosynthetic process	6	5.60748	0.000465278	IFNG, IL1B, TNF, FGF2, NFKB1, SOD1	105	103	16650	9.23717	0.896463	0.00191981	0.00126701
GOTERM_BP_FAT	GO:0010827~regulation of glucose transport	6	5.60748	0.000465278	IL1B, PTPN11, MAPK14, TNF, NFE2L2, INS	105	103	16650	9.23717	0.896463	0.00191981	0.00126701
GOTERM_BP_FAT	GO:0070059~intrinsic apoptotic signaling pathway in response to endoplasmic reticulum stress	5	4.6729	0.000470349	XBP1, AIFM1, BCL2, BAX, HSPA1A	105	58	16650	13.67	0.898992	0.00193746	0.00127865
GOTERM_BP_FAT	GO:0051881~regulation of mitochondrial membrane potential	5	4.6729	0.000470349	SRC, BCL2, BAX, SOD2, SOD1	105	58	16650	13.67	0.898992	0.00193746	0.00127865
GOTERM_BP_FAT	GO:0008630~intrinsic apoptotic signaling pathway in response to DNA damage	6	5.60748	0.000486378	BCL2, BAX, MIF, SOD2, TNF, TP53	105	104	16650	9.14835	0.906585	0.00200179	0.00132111
GOTERM_BP_FAT	GO:0050927~positive regulation of positive chemotaxis	4	3.73832	0.000492694	CXCL8, F2RL1, AGER, VEGFA	105	25	16650	25.3714	0.909417	0.00201926	0.00133264
GOTERM_BP_FAT	GO:1900117~regulation of execution phase of apoptosis	4	3.73832	0.000492694	AIFM1, CXCR3, BAX, TP53	105	25	16650	25.3714	0.909417	0.00201926	0.00133264
GOTERM_BP_FAT	GO:0032069~regulation of nuclease activity	4	3.73832	0.000492694	PRKCD, BAX, HMGB1, HSPA1A	105	25	16650	25.3714	0.909417	0.00201926	0.00133264
GOTERM_BP_FAT	GO:2000209~regulation of anoikis	4	3.73832	0.000492694	SRC, BCL2, ITGA5, PTK2	105	25	16650	25.3714	0.909417	0.00201926	0.00133264
GOTERM_BP_FAT	GO:0043537~negative regulation of blood vessel endothelial cell migration	4	3.73832	0.000492694	TGFB1, HMGB1, FGF2, RHOA	105	25	16650	25.3714	0.909417	0.00201926	0.00133264
GOTERM_BP_FAT	GO:0001885~endothelial cell development	5	4.6729	0.000502152	IL1B, F2RL1, EZR, TNF, ICAM1	105	59	16650	13.4383	0.913499	0.00205629	0.00135708
GOTERM_BP_FAT	GO:0034101~erythrocyte homeostasis	6	5.60748	0.000508191	CASP3, ISG15, MAPK14, HIF1A, KLF2, VEGFA	105	105	16650	9.06122	0.916009	0.00207927	0.00137224
GOTERM_BP_FAT	GO:0048639~positive regulation of developmental growth	7	6.54206	0.000517609	BCL2, FN1, GHRL, EZR, MAPK14, FGF2, VEGFA	105	161	16650	6.89441	0.919779	0.00211603	0.0013965
GOTERM_BP_FAT	GO:0046834~lipid phosphorylation	6	5.60748	0.000530732	PTPN11, FYN, PIK3CB, FGF2, EGFR, PIK3CG	105	106	16650	8.97574	0.92475	0.00216786	0.00143071
GOTERM_BP_FAT	GO:0051148~negative regulation of muscle cell differentiation	5	4.6729	0.000535457	CXCL10, XBP1, TGFB1, IL18, TNF	105	60	16650	13.2143	0.926464	0.00218168	0.00143982
GOTERM_BP_FAT	GO:0019730~antimicrobial humoral response	5	4.6729	0.000535457	APP, CALCA, DEFA1, B2M, CAMP	105	60	16650	13.2143	0.926464	0.00218168	0.00143982
GOTERM_BP_FAT	GO:0019915~lipid storage	5	4.6729	0.000535457	CRP, IL6, IL1B, TNF, NFKB1	105	60	16650	13.2143	0.926464	0.00218168	0.00143982
GOTERM_BP_FAT	GO:0032897~negative regulation of viral transcription	4	3.73832	0.000554439	IFITM3, JUN, CCL5, CCL4	105	26	16650	24.3956	0.932964	0.00225148	0.0014859
GOTERM_BP_FAT	GO:0002369~T cell cytokine production	4	3.73832	0.000554439	IL6, IFNB1, B2M, CD55	105	26	16650	24.3956	0.932964	0.00225148	0.0014859
GOTERM_BP_FAT	GO:0001782~B cell homeostasis	4	3.73832	0.000554439	BCL2, BAX, MIF, HIF1A	105	26	16650	24.3956	0.932964	0.00225148	0.0014859
GOTERM_BP_FAT	GO:0050926~regulation of positive chemotaxis	4	3.73832	0.000554439	CXCL8, F2RL1, AGER, VEGFA	105	26	16650	24.3956	0.932964	0.00225148	0.0014859
GOTERM_BP_FAT	GO:0046777~protein autophosphorylation	8	7.47664	0.000567805	JUN, RIPK3, SRC, FYN, PTK2, EGFR, INS, VEGFA	105	228	16650	5.56391	0.937194	0.00230384	0.00152045
GOTERM_BP_FAT	GO:0051712~positive regulation of killing of cells of other organism	3	2.80374	0.000570236	IFNG, NOS2, F2RL1	105	6	16650	79.2857	0.937934	0.00230794	0.00152315
GOTERM_BP_FAT	GO:0045084~positive regulation of interleukin-12 biosynthetic process	3	2.80374	0.000570236	IFNG, TLR4, RELA	105	6	16650	79.2857	0.937934	0.00230794	0.00152315
GOTERM_BP_FAT	GO:0090336~positive regulation of brown fat cell differentiation	3	2.80374	0.000570236	MAPK14, PTGS2, INS	105	6	16650	79.2857	0.937934	0.00230794	0.00152315
GOTERM_BP_FAT	GO:0046660~female sex differentiation	6	5.60748	0.000578061	SGPL1, BCL2, BAX, ICAM1, SOD1, VEGFA	105	108	16650	8.80952	0.940257	0.00233767	0.00154277
GOTERM_BP_FAT	GO:0048708~astrocyte differentiation	5	4.6729	0.000606732	PTPN11, F2, AGER, TLR4, EGFR	105	62	16650	12.788	0.948051	0.00244752	0.00161527
GOTERM_BP_FAT	GO:0014823~response to activity	5	4.6729	0.000606732	IL10, CCL2, SOD2, HIF1A, HSPD1	105	62	16650	12.788	0.948051	0.00244752	0.00161527
GOTERM_BP_FAT	GO:0045670~regulation of osteoclast differentiation	5	4.6729	0.000606732	CALCA, IFNG, TNF, TLR4, TLR3	105	62	16650	12.788	0.948051	0.00244752	0.00161527
GOTERM_BP_FAT	GO:0051147~regulation of muscle cell differentiation	7	6.54206	0.000608226	CXCL10, XBP1, TGFB1, BCL2, IL18, MAPK14, TNF	105	166	16650	6.68675	0.948429	0.00244949	0.00161657
GOTERM_BP_FAT	GO:0071229~cellular response to acid chemical	7	6.54206	0.000608226	XBP1, SRC, MMP2, CCL2, TNF, EGFR, AQP1	105	166	16650	6.68675	0.948429	0.00244949	0.00161657
GOTERM_BP_FAT	GO:0045191~regulation of isotype switching	4	3.73832	0.000620922	IL10, TGFB1, IFNG, IL2	105	27	16650	23.4921	0.951524	0.00249033	0.00164353
GOTERM_BP_FAT	GO:1902893~regulation of pri-miRNA transcription from RNA polymerase II promoter	4	3.73832	0.000620922	JUN, TGFB1, HIF1A, RELA	105	27	16650	23.4921	0.951524	0.00249033	0.00164353
GOTERM_BP_FAT	GO:0034105~positive regulation of tissue remodeling	4	3.73832	0.000620922	IL18, BAX, EGFR, IL2	105	27	16650	23.4921	0.951524	0.00249033	0.00164353
GOTERM_BP_FAT	GO:1901522~positive regulation of transcription from RNA polymerase II promoter involved in cellular response to chemical stimulus	4	3.73832	0.000620922	XBP1, HIF1A, NFE2L2, VEGFA	105	27	16650	23.4921	0.951524	0.00249033	0.00164353
GOTERM_BP_FAT	GO:0030947~regulation of vascular endothelial growth factor receptor signaling pathway	4	3.73832	0.000620922	IL1B, ITGA5, HIF1A, VEGFA	105	27	16650	23.4921	0.951524	0.00249033	0.00164353
GOTERM_BP_FAT	GO:0050852~T cell receptor signaling pathway	7	6.54206	0.000627741	IFNG, FYN, PLCG1, PIK3CB, EZR, RELA, NFKB1	105	167	16650	6.64671	0.95311	0.00251561	0.00166021
GOTERM_BP_FAT	GO:0031346~positive regulation of cell projection organization	9	8.41121	0.000636545	IL6, SRC, FN1, F2RL1, FYN, RHOA, IL2, NFE2L2, VEGFA	105	304	16650	4.69455	0.95508	0.0025488	0.00168211
GOTERM_BP_FAT	GO:0046324~regulation of glucose import	5	4.6729	0.000644781	PTPN11, MAPK14, TNF, NFE2L2, INS	105	63	16650	12.585	0.956848	0.00257542	0.00169968
GOTERM_BP_FAT	GO:0060193~positive regulation of lipase activity	5	4.6729	0.000644781	CCL5, PRKCD, FGF2, RHOA, EGFR	105	63	16650	12.585	0.956848	0.00257542	0.00169968
GOTERM_BP_FAT	GO:1901216~positive regulation of neuron death	5	4.6729	0.000644781	JUN, AIFM1, CASP3, BAX, TP53	105	63	16650	12.585	0.956848	0.00257542	0.00169968
GOTERM_BP_FAT	GO:0031099~regeneration	7	6.54206	0.000647739	IL10, JUN, TGFB1, BCL2, CCL2, MAPK14, EGFR	105	168	16650	6.60714	0.957466	0.00258512	0.00170608
GOTERM_BP_FAT	GO:0003158~endothelium development	6	5.60748	0.000654909	IL1B, F2RL1, EZR, TNF, RHOA, ICAM1	105	111	16650	8.57143	0.958928	0.0026116	0.00172356
GOTERM_BP_FAT	GO:0031589~cell-substrate adhesion	9	8.41121	0.000664417	PLAU, SRC, BCL2, FN1, ACTN4, PIK3CB, ITGA5, PTK2, VEGFA	105	306	16650	4.66387	0.960788	0.00264735	0.00174715
GOTERM_BP_FAT	GO:0009746~response to hexose	7	6.54206	0.000668228	XBP1, TGFB1, CASP3, PTGS2, GLUL, HIF1A, ICAM1	105	169	16650	6.56805	0.96151	0.00266035	0.00175574
GOTERM_BP_FAT	GO:0030036~actin cytoskeleton organization	12	11.215	0.000671945	TGFB1, SRC, PRKCD, BCL2, F2RL1, GHRL, ACTN4, EZR, TNF, RHOA, AQP1, ICAM1	105	553	16650	3.44097	0.962202	0.00267297	0.00176406
GOTERM_BP_FAT	GO:0090287~regulation of cellular response to growth factor stimulus	8	7.47664	0.000679106	XBP1, TGFB1, IL1B, ITGA5, HIF1A, FGF2, HSPA1A, VEGFA	105	235	16650	5.39818	0.963499	0.00269925	0.00178141
GOTERM_BP_FAT	GO:0030183~B cell differentiation	6	5.60748	0.000682151	IL10, XBP1, IFNA1, IFNB1, BCL2, BAX	105	112	16650	8.4949	0.964037	0.00270914	0.00178794
GOTERM_BP_FAT	GO:0001773~myeloid dendritic cell activation	4	3.73832	0.000692288	IL10, TGFB1, CSF2, HMGB1	105	28	16650	22.6531	0.965771	0.00274047	0.00180861
GOTERM_BP_FAT	GO:0043276~anoikis	4	3.73832	0.000692288	SRC, BCL2, ITGA5, PTK2	105	28	16650	22.6531	0.965771	0.00274047	0.00180861
GOTERM_BP_FAT	GO:0036336~dendritic cell migration	4	3.73832	0.000692288	CCL5, HMGB1, CCR5, PIK3CG	105	28	16650	22.6531	0.965771	0.00274047	0.00180861
GOTERM_BP_FAT	GO:0036230~granulocyte activation	4	3.73832	0.000692288	CXCL8, CCL5, PRKCD, F2RL1	105	28	16650	22.6531	0.965771	0.00274047	0.00180861
GOTERM_BP_FAT	GO:0061448~connective tissue development	8	7.47664	0.000696327	XBP1, TGFB1, IFNG, GHRL, MAPK14, HIF1A, FGF2, RELA	105	236	16650	5.3753	0.966439	0.00275199	0.00181621
GOTERM_BP_FAT	GO:0021700~developmental maturation	8	7.47664	0.000696327	APP, XBP1, MMP2, BCL2, HIF1A, RHOA, KLF2, VEGFA	105	236	16650	5.3753	0.966439	0.00275199	0.00181621
GOTERM_BP_FAT	GO:0060562~epithelial tube morphogenesis	9	8.41121	0.000708068	TGFB1, SRC, BCL2, BAX, HIF1A, TNF, FGF2, RHOA, VEGFA	105	309	16650	4.61859	0.968306	0.00279612	0.00184534
GOTERM_BP_FAT	GO:0045666~positive regulation of neuron differentiation	9	8.41121	0.000723122	IL6, IFNG, BCL2, FN1, FYN, RHOA, IL2, NFE2L2, VEGFA	105	310	16650	4.60369	0.97055	0.00285326	0.00188305
GOTERM_BP_FAT	GO:0002200~somatic diversification of immune receptors	5	4.6729	0.000725905	TGFB1, IFNG, HMGB1, IL2, HSPD1	105	65	16650	12.1978	0.970947	0.0028573	0.00188571
GOTERM_BP_FAT	GO:0035710~CD4-positive, alpha-beta T cell activation	5	4.6729	0.000725905	IL6, IFNG, IL18, HMGB1, CD55	105	65	16650	12.1978	0.970947	0.0028573	0.00188571
GOTERM_BP_FAT	GO:0006970~response to osmotic stress	5	4.6729	0.000725905	BAX, TNF, EGFR, TLR3, AQP1	105	65	16650	12.1978	0.970947	0.0028573	0.00188571
GOTERM_BP_FAT	GO:0007623~circadian rhythm	7	6.54206	0.000732722	IL6, JUN, CSF2, NOS2, GHRL, TP53, EGFR	105	172	16650	6.45349	0.971897	0.0028818	0.00190188
GOTERM_BP_FAT	GO:0045664~regulation of neuron differentiation	12	11.215	0.000745205	APP, IL6, IFNG, BCL2, FN1, FYN, B2M, PTK2, RHOA, IL2, NFE2L2, VEGFA	105	560	16650	3.39796	0.973556	0.00292853	0.00193272
GOTERM_BP_FAT	GO:0051259~protein oligomerization	11	10.2804	0.000748395	RIPK3, SRC, CCL5, SIGMAR1, BAX, MIF, CRYAA, SOD2, GLUL, TP53, INS	105	473	16650	3.68771	0.973965	0.0029387	0.00193944
GOTERM_BP_FAT	GO:0006109~regulation of carbohydrate metabolic process	7	6.54206	0.000755257	IL6, TGFB1, SRC, HMGB1, HIF1A, NFKB1, INS	105	173	16650	6.41618	0.974821	0.00296326	0.00195564
GOTERM_BP_FAT	GO:0007186~G-protein coupled receptor signaling pathway	19	17.757	0.000763736	CALCA, CXCL8, SRC, SIGMAR1, PIK3CB, F2, IL2, PIK3CG, INS, CXCL10, CXCL11, CCL5, CXCR3, CCL4, F2RL1, CCL2, GHRL, EZR, CCR5	105	1261	16650	2.38926	0.975841	0.00299331	0.00197548
GOTERM_BP_FAT	GO:0070229~negative regulation of lymphocyte apoptotic process	4	3.73832	0.000768677	CCL5, MIF, HIF1A, IL2	105	29	16650	21.8719	0.976416	0.00299331	0.00197548
GOTERM_BP_FAT	GO:0010743~regulation of macrophage derived foam cell differentiation	4	3.73832	0.000768677	CRP, CSF2, IL18, NFKB1	105	29	16650	21.8719	0.976416	0.00299331	0.00197548
GOTERM_BP_FAT	GO:0070266~necroptotic process	4	3.73832	0.000768677	RIPK3, TNF, TLR4, TLR3	105	29	16650	21.8719	0.976416	0.00299331	0.00197548
GOTERM_BP_FAT	GO:0032733~positive regulation of interleukin-10 production	4	3.73832	0.000768677	HMGB1, TLR4, HSPD1, TLR2	105	29	16650	21.8719	0.976416	0.00299331	0.00197548
GOTERM_BP_FAT	GO:2000516~positive regulation of CD4-positive, alpha-beta T cell activation	4	3.73832	0.000768677	IL6, IFNG, IL18, CD55	105	29	16650	21.8719	0.976416	0.00299331	0.00197548
GOTERM_BP_FAT	GO:0042149~cellular response to glucose starvation	4	3.73832	0.000768677	XBP1, BCL2, TP53, NFE2L2	105	29	16650	21.8719	0.976416	0.00299331	0.00197548
GOTERM_BP_FAT	GO:0002701~negative regulation of production of molecular mediator of immune response	4	3.73832	0.000768677	IL10, TGFB1, IFNB1, TNF	105	29	16650	21.8719	0.976416	0.00299331	0.00197548
GOTERM_BP_FAT	GO:0061614~pri-miRNA transcription from RNA polymerase II promoter	4	3.73832	0.000768677	JUN, TGFB1, HIF1A, RELA	105	29	16650	21.8719	0.976416	0.00299331	0.00197548
GOTERM_BP_FAT	GO:1904035~regulation of epithelial cell apoptotic process	5	4.6729	0.000769059	IL10, IL6, XBP1, ICAM1, NFE2L2	105	66	16650	12.013	0.97646	0.00299331	0.00197548
GOTERM_BP_FAT	GO:0034765~regulation of ion transmembrane transport	10	9.34579	0.000777129	CXCL10, CXCL11, TGFB1, CXCR3, BAX, ACTN4, PLCG1, F2, MMP9, PIK3CG	105	392	16650	4.04519	0.977369	0.00302231	0.00199461
GOTERM_BP_FAT	GO:0031622~positive regulation of fever generation	3	2.80374	0.000795075	IL1B, PTGS2, TNF	105	7	16650	67.9592	0.979265	0.00308226	0.00203418
GOTERM_BP_FAT	GO:0032627~interleukin-23 production	3	2.80374	0.000795075	CSF2, IFNG, TLR4	105	7	16650	67.9592	0.979265	0.00308226	0.00203418
GOTERM_BP_FAT	GO:0071639~positive regulation of monocyte chemotactic protein-1 production	3	2.80374	0.000795075	IL1A, IL1B, AGER	105	7	16650	67.9592	0.979265	0.00308226	0.00203418
GOTERM_BP_FAT	GO:0051709~regulation of killing of cells of other organism	3	2.80374	0.000795075	IFNG, NOS2, F2RL1	105	7	16650	67.9592	0.979265	0.00308226	0.00203418
GOTERM_BP_FAT	GO:0046887~positive regulation of hormone secretion	6	5.60748	0.000831286	PTPN11, GHRL, GLUL, HIF1A, EGFR, INS	105	117	16650	8.13187	0.982622	0.00322008	0.00212513
GOTERM_BP_FAT	GO:0002714~positive regulation of B cell mediated immunity	4	3.73832	0.000850226	TGFB1, IFNG, TNF, IL2	105	30	16650	21.1429	0.984155	0.00328561	0.00216838
GOTERM_BP_FAT	GO:0060325~face morphogenesis	4	3.73832	0.000850226	SGPL1, TGFB1, MMP2, PTPN11	105	30	16650	21.1429	0.984155	0.00328561	0.00216838
GOTERM_BP_FAT	GO:0002891~positive regulation of immunoglobulin mediated immune response	4	3.73832	0.000850226	TGFB1, IFNG, TNF, IL2	105	30	16650	21.1429	0.984155	0.00328561	0.00216838
GOTERM_BP_FAT	GO:0030279~negative regulation of ossification	5	4.6729	0.000860757	CALCA, TGFB1, BCL2, HIF1A, TNF	105	68	16650	11.6597	0.984948	0.00332104	0.00219176
GOTERM_BP_FAT	GO:0046323~glucose import	5	4.6729	0.000860757	PTPN11, MAPK14, TNF, NFE2L2, INS	105	68	16650	11.6597	0.984948	0.00332104	0.00219176
GOTERM_BP_FAT	GO:0034250~positive regulation of cellular amide metabolic process	6	5.60748	0.000863815	IL6, TGFB1, CCL5, PRKCD, TNF, NFE2L2	105	118	16650	8.06295	0.985171	0.0033302	0.00219781
GOTERM_BP_FAT	GO:0043280~positive regulation of cysteine-type endopeptidase activity involved in apoptotic process	6	5.60748	0.000897283	AIFM1, CASP3, BAX, HMGB1, TNF, HSPD1	105	119	16650	7.9952	0.987405	0.00345376	0.00227935
GOTERM_BP_FAT	GO:0043271~negative regulation of ion transport	6	5.60748	0.000897283	CALCA, TGFB1, BCL2, PTGS2, MMP9, ICAM1	105	119	16650	7.9952	0.987405	0.00345376	0.00227935
GOTERM_BP_FAT	GO:0046849~bone remodeling	5	4.6729	0.00090938	IL6, CALCA, TGFB1, SRC, EGFR	105	69	16650	11.4907	0.988126	0.0034948	0.00230644
GOTERM_BP_FAT	GO:0001938~positive regulation of endothelial cell proliferation	5	4.6729	0.00090938	JUN, CCL2, HIF1A, FGF2, VEGFA	105	69	16650	11.4907	0.988126	0.0034948	0.00230644
GOTERM_BP_FAT	GO:0051346~negative regulation of hydrolase activity	10	9.34579	0.000912139	PTPA, APP, IL6, SRC, TNF, TP53, MMP9, KNG1, AQP1, VEGFA	105	401	16650	3.9544	0.988285	0.00350264	0.00231161
GOTERM_BP_FAT	GO:0043933~macromolecular complex subunit organization	29	27.1028	0.000913462	CSF2, SRC, HMGB1, FGF2, TNF, HSPD1, INS, ICAM1, AIFM1, CCL5, GLUL, XBP1, JUN, TGFB1, RIPK3, PRKCD, SIGMAR1, FN1, MIF, SOD2, PTK2, VEGFA, IL5, IL1B, BAX, F2RL1, CRYAA, TP53, TLR4	105	2461	16650	1.86858	0.98836	0.00350496	0.00231314
GOTERM_BP_FAT	GO:0007178~transmembrane receptor protein serine/threonine kinase signaling pathway	9	8.41121	0.000924783	XBP1, JUN, TGFB1, SRC, CCL2, MAPK14, PTK2, RHOA, HSPA1A	105	322	16650	4.43212	0.988986	0.00354287	0.00233817
GOTERM_BP_FAT	GO:0072521~purine-containing compound metabolic process	12	11.215	0.000924797	CXCL10, CXCL11, CALCA, TGFB1, TTR, NOS2, CXCR3, HIF1A, AQP1, HSPA1A, INS, VEGFA	105	575	16650	3.30932	0.988986	0.00354287	0.00233817
GOTERM_BP_FAT	GO:0032965~regulation of collagen biosynthetic process	4	3.73832	0.000937068	IL6, TGFB1, CCL2, F2	105	31	16650	20.4608	0.989626	0.00357863	0.00236176
GOTERM_BP_FAT	GO:0071392~cellular response to estradiol stimulus	4	3.73832	0.000937068	IL10, IL6, AIFM1, EGFR	105	31	16650	20.4608	0.989626	0.00357863	0.00236176
GOTERM_BP_FAT	GO:0014911~positive regulation of smooth muscle cell migration	4	3.73832	0.000937068	XBP1, SRC, CCL5, BCL2	105	31	16650	20.4608	0.989626	0.00357863	0.00236176
GOTERM_BP_FAT	GO:0043552~positive regulation of phosphatidylinositol 3-kinase activity	4	3.73832	0.000937068	TGFB1, SRC, FGF2, PTK2	105	31	16650	20.4608	0.989626	0.00357863	0.00236176
GOTERM_BP_FAT	GO:0001558~regulation of cell growth	10	9.34579	0.000944593	TGFB1, IL9, BCL2, FN1, F2, TP53, EGFR, IL2, INS, VEGFA	105	403	16650	3.93477	0.99	0.00360454	0.00237887
GOTERM_BP_FAT	GO:0007346~regulation of mitotic cell cycle	11	10.2804	0.000994484	IL10, IL1A, APP, TGFB1, IL1B, BCL2, BAX, PTPN11, TP53, EGFR, INS	105	491	16650	3.55252	0.99216	0.00379196	0.00250255
GOTERM_BP_FAT	GO:0090068~positive regulation of cell cycle process	8	7.47664	0.000998853	IL1A, APP, TGFB1, IL1B, BAX, TP53, RHOA, INS	105	251	16650	5.05407	0.992325	0.00380564	0.00251158
GOTERM_BP_FAT	GO:0051250~negative regulation of lymphocyte activation	6	5.60748	0.0010035	IL10, TGFB1, IFNB1, IL2RA, HMGB1, IL2	105	122	16650	7.79859	0.992497	0.00382035	0.00252129
GOTERM_BP_FAT	GO:0042092~type 2 immune response	4	3.73832	0.00102934	IL10, IL6, IFNB1, IL18	105	32	16650	19.8214	0.993386	0.00390651	0.00257815
GOTERM_BP_FAT	GO:0048147~negative regulation of fibroblast proliferation	4	3.73832	0.00102934	IFNG, BAX, SOD2, TP53	105	32	16650	19.8214	0.993386	0.00390651	0.00257815
GOTERM_BP_FAT	GO:1901224~positive regulation of NIK/NF-kappaB signaling	4	3.73832	0.00102934	ACTN4, HMGB1, TNF, TLR3	105	32	16650	19.8214	0.993386	0.00390651	0.00257815
GOTERM_BP_FAT	GO:0002042~cell migration involved in sprouting angiogenesis	4	3.73832	0.00102934	PTGS2, FGF2, RHOA, VEGFA	105	32	16650	19.8214	0.993386	0.00390651	0.00257815
GOTERM_BP_FAT	GO:0050890~cognition	8	7.47664	0.00104598	APP, JUN, CASP3, FYN, ITGA5, PTGS2, HIF1A, EGFR	105	253	16650	5.01412	0.993902	0.00396659	0.0026178
GOTERM_BP_FAT	GO:0071499~cellular response to laminar fluid shear stress	3	2.80374	0.00105578	XBP1, KLF2, NFE2L2	105	8	16650	59.4643	0.994186	0.00398823	0.00263208
GOTERM_BP_FAT	GO:0035234~ectopic germ cell programmed cell death	3	2.80374	0.00105578	IL1A, IL1B, BAX	105	8	16650	59.4643	0.994186	0.00398823	0.00263208
GOTERM_BP_FAT	GO:0045416~positive regulation of interleukin-8 biosynthetic process	3	2.80374	0.00105578	TNF, TLR4, ELANE	105	8	16650	59.4643	0.994186	0.00398823	0.00263208
GOTERM_BP_FAT	GO:0071316~cellular response to nicotine	3	2.80374	0.00105578	TNF, RELA, NFKB1	105	8	16650	59.4643	0.994186	0.00398823	0.00263208
GOTERM_BP_FAT	GO:0031620~regulation of fever generation	3	2.80374	0.00105578	IL1B, PTGS2, TNF	105	8	16650	59.4643	0.994186	0.00398823	0.00263208
GOTERM_BP_FAT	GO:1901615~organic hydroxy compound metabolic process	10	9.34579	0.00106567	APP, TTR, IFNG, IL1B, BCL2, PLCG1, TNF, FGF2, NFKB1, SOD1	105	410	16650	3.8676	0.99446	0.00402248	0.00265469
GOTERM_BP_FAT	GO:0045931~positive regulation of mitotic cell cycle	6	5.60748	0.00107932	IL1A, APP, TGFB1, IL1B, PTPN11, INS	105	124	16650	7.67281	0.994817	0.00407084	0.0026866
GOTERM_BP_FAT	GO:0045445~myoblast differentiation	5	4.6729	0.00112331	CXCL10, TGFB1, IL18, MAPK14, TNF	105	73	16650	10.8611	0.995818	0.00423349	0.00279395
GOTERM_BP_FAT	GO:0002755~MyD88-dependent toll-like receptor signaling pathway	4	3.73832	0.00112716	TLR5, TLR4, HSPD1, TLR2	105	33	16650	19.2208	0.995896	0.00423814	0.00279702
GOTERM_BP_FAT	GO:0002711~positive regulation of T cell mediated immunity	4	3.73832	0.00112716	IL6, IL1B, B2M, HSPD1	105	33	16650	19.2208	0.995896	0.00423814	0.00279702
GOTERM_BP_FAT	GO:0007435~salivary gland morphogenesis	4	3.73832	0.00112716	IL6, TGFB1, TNF, EGFR	105	33	16650	19.2208	0.995896	0.00423814	0.00279702
GOTERM_BP_FAT	GO:0045732~positive regulation of protein catabolic process	8	7.47664	0.00114549	XBP1, IFNG, IL1B, EZR, TNF, PTK2, HSPA1A, NFE2L2	105	257	16650	4.93608	0.996247	0.00430374	0.00284031
GOTERM_BP_FAT	GO:0001654~eye development	9	8.41121	0.00116935	JUN, TGFB1, BCL2, BAX, HMGB1, AQP5, HIF1A, EGFR, VEGFA	105	334	16650	4.27288	0.996659	0.00439	0.00289724
GOTERM_BP_FAT	GO:0071357~cellular response to type I interferon	5	4.6729	0.00118186	IFITM3, IRF3, IFNA1, IFNB1, ISG15	105	74	16650	10.7143	0.996857	0.00443015	0.00292373
GOTERM_BP_FAT	GO:0060337~type I interferon signaling pathway	5	4.6729	0.00118186	IFITM3, IRF3, IFNA1, IFNB1, ISG15	105	74	16650	10.7143	0.996857	0.00443015	0.00292373
GOTERM_BP_FAT	GO:0007015~actin filament organization	9	8.41121	0.00119186	SRC, PRKCD, BCL2, F2RL1, GHRL, ACTN4, EZR, RHOA, ICAM1	105	335	16650	4.26013	0.997007	0.00446419	0.0029462
GOTERM_BP_FAT	GO:0051271~negative regulation of cellular component movement	8	7.47664	0.00119795	TGFB1, BCL2, CCL2, ACTN4, HMGB1, FGF2, RHOA, NFE2L2	105	259	16650	4.89796	0.997094	0.00448357	0.00295899
GOTERM_BP_FAT	GO:0048568~embryonic organ development	10	9.34579	0.00119906	IL10, IL3, TGFB1, CXCL8, CSF2, HIF1A, TNF, EGFR, SOD1, VEGFA	105	417	16650	3.80267	0.99711	0.00448429	0.00295947
GOTERM_BP_FAT	GO:0038096~Fc-gamma receptor signaling pathway involved in phagocytosis	6	5.60748	0.00120092	SRC, PRKCD, FYN, PLCG1, PIK3CB, PTK2	105	127	16650	7.49156	0.997136	0.00448434	0.0029595
GOTERM_BP_FAT	GO:0002433~immune response-regulating cell surface receptor signaling pathway involved in phagocytosis	6	5.60748	0.00120092	SRC, PRKCD, FYN, PLCG1, PIK3CB, PTK2	105	127	16650	7.49156	0.997136	0.00448434	0.0029595
GOTERM_BP_FAT	GO:0009187~cyclic nucleotide metabolic process	7	6.54206	0.00122701	CXCL10, CXCL11, CALCA, NOS2, CXCR3, AQP1, VEGFA	105	190	16650	5.84211	0.997478	0.00457785	0.00302121
GOTERM_BP_FAT	GO:0001912~positive regulation of leukocyte mediated cytotoxicity	4	3.73832	0.00123065	NOS2, F2RL1, CCL2, B2M	105	34	16650	18.6555	0.997523	0.00457785	0.00302121
GOTERM_BP_FAT	GO:0050702~interleukin-1 beta secretion	4	3.73832	0.00123065	IFNG, F2RL1, HMGB1, TLR4	105	34	16650	18.6555	0.997523	0.00457785	0.00302121
GOTERM_BP_FAT	GO:0045124~regulation of bone resorption	4	3.73832	0.00123065	IL6, CALCA, SRC, EGFR	105	34	16650	18.6555	0.997523	0.00457785	0.00302121
GOTERM_BP_FAT	GO:0006308~DNA catabolic process	4	3.73832	0.00123065	AIFM1, CASP3, BAX, HMGB1	105	34	16650	18.6555	0.997523	0.00457785	0.00302121
GOTERM_BP_FAT	GO:0045913~positive regulation of carbohydrate metabolic process	5	4.6729	0.00124251	SRC, HMGB1, HIF1A, NFKB1, INS	105	75	16650	10.5714	0.997662	0.0046149	0.00304566
GOTERM_BP_FAT	GO:0016525~negative regulation of angiogenesis	5	4.6729	0.00124251	CXCL10, CXCR3, CCL2, GHRL, RHOA	105	75	16650	10.5714	0.997662	0.0046149	0.00304566
GOTERM_BP_FAT	GO:2001056~positive regulation of cysteine-type endopeptidase activity	6	5.60748	0.00124362	AIFM1, CASP3, BAX, HMGB1, TNF, HSPD1	105	128	16650	7.43304	0.997675	0.0046155	0.00304606
GOTERM_BP_FAT	GO:0006006~glucose metabolic process	7	6.54206	0.00126049	IL6, SRC, GHRL, HMGB1, MAPK14, TNF, INS	105	191	16650	5.81152	0.997858	0.00467454	0.00308502
GOTERM_BP_FAT	GO:0007423~sensory organ development	11	10.2804	0.00126574	JUN, TGFB1, BCL2, BAX, PTPN11, HMGB1, AQP5, HIF1A, EGFR, SOD1, VEGFA	105	507	16650	3.44041	0.997913	0.00469047	0.00309554
GOTERM_BP_FAT	GO:0019218~regulation of steroid metabolic process	5	4.6729	0.0013053	IFNG, IL1B, TNF, NFKB1, SOD1	105	76	16650	10.4323	0.998279	0.0048334	0.00318986
GOTERM_BP_FAT	GO:0002431~Fc receptor mediated stimulatory signaling pathway	6	5.60748	0.00133238	SRC, PRKCD, FYN, PLCG1, PIK3CB, PTK2	105	130	16650	7.31868	0.998492	0.00492615	0.00325108
GOTERM_BP_FAT	GO:0045471~response to ethanol	6	5.60748	0.00133238	CCL2, FYN, SOD2, IL2, ICAM1, SOD1	105	130	16650	7.31868	0.998492	0.00492615	0.00325108
GOTERM_BP_FAT	GO:1903202~negative regulation of oxidative stress-induced cell death	4	3.73832	0.00133995	SOD2, HIF1A, NFE2L2, INS	105	35	16650	18.1224	0.998547	0.00493172	0.00325475
GOTERM_BP_FAT	GO:0060323~head morphogenesis	4	3.73832	0.00133995	SGPL1, TGFB1, MMP2, PTPN11	105	35	16650	18.1224	0.998547	0.00493172	0.00325475
GOTERM_BP_FAT	GO:1902883~negative regulation of response to oxidative stress	4	3.73832	0.00133995	SOD2, HIF1A, NFE2L2, INS	105	35	16650	18.1224	0.998547	0.00493172	0.00325475
GOTERM_BP_FAT	GO:0071312~cellular response to alkaloid	4	3.73832	0.00133995	TNF, RELA, NFKB1, ICAM1	105	35	16650	18.1224	0.998547	0.00493172	0.00325475
GOTERM_BP_FAT	GO:1903523~negative regulation of blood circulation	4	3.73832	0.00133995	CRP, IL2, PIK3CG, INS	105	35	16650	18.1224	0.998547	0.00493172	0.00325475
GOTERM_BP_FAT	GO:1900408~negative regulation of cellular response to oxidative stress	4	3.73832	0.00133995	SOD2, HIF1A, NFE2L2, INS	105	35	16650	18.1224	0.998547	0.00493172	0.00325475
GOTERM_BP_FAT	GO:0048291~isotype switching to IgG isotypes	3	2.80374	0.0013519	IFNG, IL2, HSPD1	105	9	16650	52.8571	0.998629	0.00496819	0.00327882
GOTERM_BP_FAT	GO:0045591~positive regulation of regulatory T cell differentiation	3	2.80374	0.0013519	TGFB1, IFNG, IL2	105	9	16650	52.8571	0.998629	0.00496819	0.00327882
GOTERM_BP_FAT	GO:0032941~secretion by tissue	5	4.6729	0.00137029	XBP1, AQP5, HIF1A, AQP1, VEGFA	105	77	16650	10.2968	0.998747	0.00502061	0.00331342
GOTERM_BP_FAT	GO:2000181~negative regulation of blood vessel morphogenesis	5	4.6729	0.00137029	CXCL10, CXCR3, CCL2, GHRL, RHOA	105	77	16650	10.2968	0.998747	0.00502061	0.00331342
GOTERM_BP_FAT	GO:0007492~endoderm development	5	4.6729	0.00137029	TGFB1, MMP2, FN1, ITGA5, MMP9	105	77	16650	10.2968	0.998747	0.00502061	0.00331342
GOTERM_BP_FAT	GO:0045454~cell redox homeostasis	5	4.6729	0.00137029	IL6, AIFM1, NOS2, CAMP, NFE2L2	105	77	16650	10.2968	0.998747	0.00502061	0.00331342
GOTERM_BP_FAT	GO:0038094~Fc-gamma receptor signaling pathway	6	5.60748	0.00137847	SRC, PRKCD, FYN, PLCG1, PIK3CB, PTK2	105	131	16650	7.26281	0.998796	0.0050468	0.0033307
GOTERM_BP_FAT	GO:0007049~cell cycle	22	20.5607	0.00138969	IL10, APP, TGFB1, CXCL8, ABCB1, SRC, PRKCD, PTPN11, MIF, PTGS2, MAPK14, RHOA, EGFR, INS, PTPA, IL1A, IFNG, IL1B, BCL2, BAX, EZR, TP53	105	1672	16650	2.08647	0.99886	0.00508405	0.00335528
GOTERM_BP_FAT	GO:0051260~protein homooligomerization	8	7.47664	0.00142696	RIPK3, SRC, SIGMAR1, BAX, MIF, CRYAA, SOD2, GLUL	105	267	16650	4.7512	0.99905	0.0052165	0.0034427
GOTERM_BP_FAT	GO:0034340~response to type I interferon	5	4.6729	0.0014375	IFITM3, IRF3, IFNA1, IFNB1, ISG15	105	78	16650	10.1648	0.999097	0.00525107	0.00346551
GOTERM_BP_FAT	GO:0098655~cation transmembrane transport	13	12.1495	0.001443	TGFB1, ACTN4, F2, FGF2, MMP9, PIK3CG, AQP1, CXCL10, CXCL11, CXCR3, BAX, PLCG1, CCR5	105	703	16650	2.93233	0.999121	0.00526721	0.00347617
GOTERM_BP_FAT	GO:0090311~regulation of protein deacetylation	4	3.73832	0.00145517	TGFB1, RIPK3, TP53, VEGFA	105	36	16650	17.619	0.999172	0.00528394	0.00348721
GOTERM_BP_FAT	GO:0030212~hyaluronan metabolic process	4	3.73832	0.00145517	TGFB1, IL1B, FGF2, NFKB1	105	36	16650	17.619	0.999172	0.00528394	0.00348721
GOTERM_BP_FAT	GO:0002251~organ or tissue specific immune response	4	3.73832	0.00145517	IL6, NOS2, DEFA1, CAMP	105	36	16650	17.619	0.999172	0.00528394	0.00348721
GOTERM_BP_FAT	GO:0001659~temperature homeostasis	4	3.73832	0.00145517	IL1A, IL1B, PTGS2, TNF	105	36	16650	17.619	0.999172	0.00528394	0.00348721
GOTERM_BP_FAT	GO:0010712~regulation of collagen metabolic process	4	3.73832	0.00145517	IL6, TGFB1, CCL2, F2	105	36	16650	17.619	0.999172	0.00528394	0.00348721
GOTERM_BP_FAT	GO:0043370~regulation of CD4-positive, alpha-beta T cell differentiation	4	3.73832	0.00145517	IL6, IFNG, IL18, HMGB1	105	36	16650	17.619	0.999172	0.00528394	0.00348721
GOTERM_BP_FAT	GO:0032459~regulation of protein oligomerization	4	3.73832	0.00145517	SRC, BAX, TP53, INS	105	36	16650	17.619	0.999172	0.00528394	0.00348721
GOTERM_BP_FAT	GO:0048565~digestive tract development	6	5.60748	0.00147418	TGFB1, CXCL8, BCL2, HIF1A, TNF, EGFR	105	133	16650	7.1536	0.999245	0.00534499	0.00352749
GOTERM_BP_FAT	GO:0051302~regulation of cell division	6	5.60748	0.00147418	IL1A, TGFB1, IL1B, FGF2, RHOA, VEGFA	105	133	16650	7.1536	0.999245	0.00534499	0.00352749
GOTERM_BP_FAT	GO:0034645~cellular macromolecule biosynthetic process	47	43.9252	0.00156196	APP, CALCA, CSF2, SRC, HMGB1, FGF2, HIF1A, TNF, AGER, RELA, EGFR, INS, ICAM1, CCL5, CXCR3, ELANE, IL10, XBP1, JUN, TGFB1, RIPK3, IFNB1, IL18, ISG15, MAPK14, SOD2, IL2, NFKB1, KLF2, VEGFA, IL1A, IL3, CXCL10, IL6, IL5, IFNG, IRF3, IL1B, BCL2, F2RL1, EZR, TP53, TLR4, TLR3, HSPA1A, NFE2L2, TLR2	105	5012	16650	1.487	0.999508	0.00565907	0.00373478
GOTERM_BP_FAT	GO:0044246~regulation of multicellular organismal metabolic process	4	3.73832	0.00157643	IL6, TGFB1, CCL2, F2	105	37	16650	17.1429	0.999542	0.00569876	0.00376097
GOTERM_BP_FAT	GO:0032964~collagen biosynthetic process	4	3.73832	0.00157643	IL6, TGFB1, CCL2, F2	105	37	16650	17.1429	0.999542	0.00569876	0.00376097
GOTERM_BP_FAT	GO:0032732~positive regulation of interleukin-1 production	4	3.73832	0.00157643	CALCA, IFNG, HMGB1, TLR4	105	37	16650	17.1429	0.999542	0.00569876	0.00376097
GOTERM_BP_FAT	GO:1903707~negative regulation of hemopoiesis	6	5.60748	0.0016268	CALCA, IFNB1, HMGB1, TLR4, TLR3, NFE2L2	105	136	16650	6.9958	0.999642	0.00586781	0.00387254
GOTERM_BP_FAT	GO:0046546~development of primary male sexual characteristics	6	5.60748	0.0016268	SGPL1, BCL2, BAX, TLR5, TLR3, ICAM1	105	136	16650	6.9958	0.999642	0.00586781	0.00387254
GOTERM_BP_FAT	GO:0008584~male gonad development	6	5.60748	0.0016268	SGPL1, BCL2, BAX, TLR5, TLR3, ICAM1	105	136	16650	6.9958	0.999642	0.00586781	0.00387254
GOTERM_BP_FAT	GO:0031058~positive regulation of histone modification	5	4.6729	0.00165289	XBP1, TGFB1, IL1B, TP53, VEGFA	105	81	16650	9.78836	0.999684	0.00595308	0.00392881
GOTERM_BP_FAT	GO:0060191~regulation of lipase activity	5	4.6729	0.00165289	CCL5, PRKCD, FGF2, RHOA, EGFR	105	81	16650	9.78836	0.999684	0.00595308	0.00392881
GOTERM_BP_FAT	GO:0031652~positive regulation of heat generation	3	2.80374	0.001683	IL1B, PTGS2, TNF	105	10	16650	47.5714	0.999728	0.00603921	0.00398566
GOTERM_BP_FAT	GO:0002739~regulation of cytokine secretion involved in immune response	3	2.80374	0.001683	IL10, F2RL1, TNF	105	10	16650	47.5714	0.999728	0.00603921	0.00398566
GOTERM_BP_FAT	GO:0019732~antifungal humoral response	3	2.80374	0.001683	APP, CALCA, CAMP	105	10	16650	47.5714	0.999728	0.00603921	0.00398566
GOTERM_BP_FAT	GO:0072567~chemokine (C-X-C motif) ligand 2 production	3	2.80374	0.001683	F2RL1, MIF, TNF	105	10	16650	47.5714	0.999728	0.00603921	0.00398566
GOTERM_BP_FAT	GO:2000501~regulation of natural killer cell chemotaxis	3	2.80374	0.001683	CCL5, CCL4, CCL2	105	10	16650	47.5714	0.999728	0.00603921	0.00398566
GOTERM_BP_FAT	GO:0045190~isotype switching	4	3.73832	0.00170383	TGFB1, IFNG, IL2, HSPD1	105	38	16650	16.6917	0.999754	0.00610049	0.0040261
GOTERM_BP_FAT	GO:0002208~somatic diversification of immunoglobulins involved in immune response	4	3.73832	0.00170383	TGFB1, IFNG, IL2, HSPD1	105	38	16650	16.6917	0.999754	0.00610049	0.0040261
GOTERM_BP_FAT	GO:0002204~somatic recombination of immunoglobulin genes involved in immune response	4	3.73832	0.00170383	TGFB1, IFNG, IL2, HSPD1	105	38	16650	16.6917	0.999754	0.00610049	0.0040261
GOTERM_BP_FAT	GO:0061024~membrane organization	16	14.9533	0.00175165	TGFB1, ABCB1, PRKCD, AGER, TNF, EGFR, SOD1, IFNG, BCL2, BAX, F2RL1, CCL2, EZR, CCR5, TP53, HSPA1A	105	1027	16650	2.47044	0.999805	0.00626711	0.00413606
GOTERM_BP_FAT	GO:0051129~negative regulation of cellular component organization	12	11.215	0.001779	CXCL10, TGFB1, SRC, PRKCD, ACTN4, HMGB1, TNF, B2M, PTK2, RHOA, HSPA1A, INS	105	624	16650	3.04945	0.99983	0.00636029	0.00419756
GOTERM_BP_FAT	GO:1901135~carbohydrate derivative metabolic process	18	16.8224	0.00178974	CALCA, TGFB1, NOS2, PRKCD, FGF2, HIF1A, NFKB1, AQP1, INS, CXCL10, CXCL11, IFNG, IL1B, CXCR3, NEU1, BCL2, BAX, HSPA1A	105	1247	16650	2.28892	0.999838	0.00639401	0.00421981
GOTERM_BP_FAT	GO:0010596~negative regulation of endothelial cell migration	4	3.73832	0.00183749	TGFB1, HMGB1, FGF2, RHOA	105	39	16650	16.2637	0.999872	0.00655498	0.00432605
GOTERM_BP_FAT	GO:0060338~regulation of type I interferon-mediated signaling pathway	4	3.73832	0.00183749	IRF3, IFNA1, IFNB1, PTPN11	105	39	16650	16.2637	0.999872	0.00655498	0.00432605
GOTERM_BP_FAT	GO:0061564~axon development	10	9.34579	0.00187445	APP, JUN, BCL2, FN1, PTPN11, FYN, EZR, PTK2, RHOA, VEGFA	105	445	16650	3.5634	0.999893	0.00668193	0.00440983
GOTERM_BP_FAT	GO:0010950~positive regulation of endopeptidase activity	6	5.60748	0.00190657	AIFM1, CASP3, BAX, HMGB1, TNF, HSPD1	105	141	16650	6.74772	0.999909	0.00679145	0.0044821
GOTERM_BP_FAT	GO:0030900~forebrain development	9	8.41121	0.0019098	APP, SRC, CASP3, BAX, FYN, HIF1A, FGF2, EGFR, AQP1	105	361	16650	3.9533	0.99991	0.00679798	0.00448642
GOTERM_BP_FAT	GO:0002695~negative regulation of leukocyte activation	6	5.60748	0.00196649	IL10, TGFB1, IFNB1, IL2RA, HMGB1, IL2	105	142	16650	6.7002	0.999932	0.00699468	0.00461623
GOTERM_BP_FAT	GO:0045778~positive regulation of ossification	5	4.6729	0.00197367	IL6, CALCA, TGFB1, ISG15, FGF2	105	85	16650	9.32773	0.999934	0.00699817	0.00461854
GOTERM_BP_FAT	GO:0043154~negative regulation of cysteine-type endopeptidase activity involved in apoptotic process	5	4.6729	0.00197367	IL6, SRC, MMP9, AQP1, VEGFA	105	85	16650	9.32773	0.999934	0.00699817	0.00461854
GOTERM_BP_FAT	GO:0098869~cellular oxidant detoxification	5	4.6729	0.00197367	ALB, SOD2, PTGS2, TNF, SOD1	105	85	16650	9.32773	0.999934	0.00699817	0.00461854
GOTERM_BP_FAT	GO:0046326~positive regulation of glucose import	4	3.73832	0.00197753	PTPN11, MAPK14, NFE2L2, INS	105	40	16650	15.8571	0.999935	0.00699817	0.00461854
GOTERM_BP_FAT	GO:0032881~regulation of polysaccharide metabolic process	4	3.73832	0.00197753	TGFB1, HMGB1, NFKB1, INS	105	40	16650	15.8571	0.999935	0.00699817	0.00461854
GOTERM_BP_FAT	GO:0031952~regulation of protein autophosphorylation	4	3.73832	0.00197753	JUN, SRC, INS, VEGFA	105	40	16650	15.8571	0.999935	0.00699817	0.00461854
GOTERM_BP_FAT	GO:0050701~interleukin-1 secretion	4	3.73832	0.00197753	IFNG, F2RL1, HMGB1, TLR4	105	40	16650	15.8571	0.999935	0.00699817	0.00461854
GOTERM_BP_FAT	GO:0044703~multi-organism reproductive process	15	14.0187	0.00201973	APP, CALCA, TGFB1, SRC, MMP2, PTGS2, MMP9, SOD1, SGPL1, IL1B, BCL2, BAX, CCL2, GHRL, CD55	105	936	16650	2.54121	0.999947	0.00714234	0.00471368
GOTERM_BP_FAT	GO:0032700~negative regulation of interleukin-17 production	3	2.80374	0.00204863	TGFB1, IFNG, TLR4	105	11	16650	43.2468	0.999954	0.00721834	0.00476384
GOTERM_BP_FAT	GO:0070431~nucleotide-binding oligomerization domain containing 2 signaling pathway	3	2.80374	0.00204863	TLR4, RELA, HSPA1A	105	11	16650	43.2468	0.999954	0.00721834	0.00476384
GOTERM_BP_FAT	GO:0001780~neutrophil homeostasis	3	2.80374	0.00204863	IL6, IFNG, HMGB1	105	11	16650	43.2468	0.999954	0.00721834	0.00476384
GOTERM_BP_FAT	GO:0002676~regulation of chronic inflammatory response	3	2.80374	0.00204863	IL10, CCL5, TNF	105	11	16650	43.2468	0.999954	0.00721834	0.00476384
GOTERM_BP_FAT	GO:0034116~positive regulation of heterotypic cell-cell adhesion	3	2.80374	0.00204863	IL10, IL1B, TNF	105	11	16650	43.2468	0.999954	0.00721834	0.00476384
GOTERM_BP_FAT	GO:0022600~digestive system process	5	4.6729	0.00206012	GHRL, AQP5, EZR, TLR4, AQP1	105	86	16650	9.21927	0.999957	0.00724836	0.00478365
GOTERM_BP_FAT	GO:0007589~body fluid secretion	5	4.6729	0.00206012	XBP1, AQP5, HIF1A, AQP1, VEGFA	105	86	16650	9.21927	0.999957	0.00724836	0.00478365
GOTERM_BP_FAT	GO:0000060~protein import into nucleus, translocation	4	3.73832	0.00212403	IL6, TGFB1, IFNG, TNF	105	41	16650	15.4704	0.999968	0.00746783	0.00492849
GOTERM_BP_FAT	GO:0006919~activation of cysteine-type endopeptidase activity involved in apoptotic process	5	4.6729	0.00214917	AIFM1, CASP3, BAX, TNF, HSPD1	105	87	16650	9.1133	0.999972	0.00753988	0.00497604
GOTERM_BP_FAT	GO:0046632~alpha-beta T cell differentiation	5	4.6729	0.00214917	IL6, IFNG, BCL2, IL18, HMGB1	105	87	16650	9.1133	0.999972	0.00753988	0.00497604
GOTERM_BP_FAT	GO:1990748~cellular detoxification	5	4.6729	0.00214917	ALB, SOD2, PTGS2, TNF, SOD1	105	87	16650	9.1133	0.999972	0.00753988	0.00497604
GOTERM_BP_FAT	GO:0035303~regulation of dephosphorylation	6	5.60748	0.00215455	PTPA, TGFB1, IFNG, RIPK3, PRKCD, TNF	105	145	16650	6.56158	0.999973	0.00755331	0.00498491
GOTERM_BP_FAT	GO:0043086~negative regulation of catalytic activity	14	13.0841	0.00216301	APP, SRC, PRKCD, TNF, MMP9, KNG1, NFKB1, AQP1, INS, VEGFA, PTPA, IL6, IL1B, TP53	105	839	16650	2.64601	0.999974	0.00757753	0.00500089
GOTERM_BP_FAT	GO:0006163~purine nucleotide metabolic process	11	10.2804	0.00221592	CXCL10, CXCL11, CALCA, TGFB1, NOS2, CXCR3, HIF1A, AQP1, HSPA1A, INS, VEGFA	105	547	16650	3.18882	0.99998	0.00775732	0.00511955
GOTERM_BP_FAT	GO:1905269~positive regulation of chromatin organization	5	4.6729	0.00224083	XBP1, TGFB1, IL1B, TP53, VEGFA	105	88	16650	9.00974	0.999982	0.00782676	0.00516537
GOTERM_BP_FAT	GO:0022617~extracellular matrix disassembly	5	4.6729	0.00224083	TGFB1, MMP2, FN1, MMP9, ELANE	105	88	16650	9.00974	0.999982	0.00782676	0.00516537
GOTERM_BP_FAT	GO:1902106~negative regulation of leukocyte differentiation	5	4.6729	0.00224083	CALCA, IFNB1, HMGB1, TLR4, TLR3	105	88	16650	9.00974	0.999982	0.00782676	0.00516537
GOTERM_BP_FAT	GO:0030336~negative regulation of cell migration	7	6.54206	0.00224218	TGFB1, BCL2, CCL2, HMGB1, FGF2, RHOA, NFE2L2	105	214	16650	5.18692	0.999982	0.00782676	0.00516537
GOTERM_BP_FAT	GO:0006775~fat-soluble vitamin metabolic process	4	3.73832	0.00227712	IFNG, IL1B, TNF, NFKB1	105	42	16650	15.102	0.999985	0.00790341	0.00521596
GOTERM_BP_FAT	GO:0048512~circadian behavior	4	3.73832	0.00227712	IL6, CSF2, GHRL, TP53	105	42	16650	15.102	0.999985	0.00790341	0.00521596
GOTERM_BP_FAT	GO:2000351~regulation of endothelial cell apoptotic process	4	3.73832	0.00227712	IL10, XBP1, ICAM1, NFE2L2	105	42	16650	15.102	0.999985	0.00790341	0.00521596
GOTERM_BP_FAT	GO:0016447~somatic recombination of immunoglobulin gene segments	4	3.73832	0.00227712	TGFB1, IFNG, IL2, HSPD1	105	42	16650	15.102	0.999985	0.00790341	0.00521596
GOTERM_BP_FAT	GO:0044060~regulation of endocrine process	4	3.73832	0.00227712	IL1B, F2RL1, PTPN11, GHRL	105	42	16650	15.102	0.999985	0.00790341	0.00521596
GOTERM_BP_FAT	GO:0043551~regulation of phosphatidylinositol 3-kinase activity	4	3.73832	0.00227712	TGFB1, SRC, FGF2, PTK2	105	42	16650	15.102	0.999985	0.00790341	0.00521596
GOTERM_BP_FAT	GO:0006509~membrane protein ectodomain proteolysis	4	3.73832	0.00227712	IL10, IFNG, IL1B, TNF	105	42	16650	15.102	0.999985	0.00790341	0.00521596
GOTERM_BP_FAT	GO:0010883~regulation of lipid storage	4	3.73832	0.00227712	CRP, IL6, TNF, NFKB1	105	42	16650	15.102	0.999985	0.00790341	0.00521596
GOTERM_BP_FAT	GO:0019722~calcium-mediated signaling	6	5.60748	0.002287	CXCL8, CXCR3, CCL4, PLCG1, CCR5, EGFR	105	147	16650	6.4723	0.999986	0.00793206	0.00523486
GOTERM_BP_FAT	GO:0050868~negative regulation of T cell activation	5	4.6729	0.00233516	IL10, TGFB1, IFNB1, IL2RA, HMGB1	105	89	16650	8.90851	0.999989	0.00808759	0.00533751
GOTERM_BP_FAT	GO:0090277~positive regulation of peptide hormone secretion	5	4.6729	0.00233516	GHRL, GLUL, HIF1A, EGFR, INS	105	89	16650	8.90851	0.999989	0.00808759	0.00533751
GOTERM_BP_FAT	GO:0071478~cellular response to radiation	6	5.60748	0.00242529	TGFB1, BAX, MAPK14, PTGS2, TP53, AQP1	105	149	16650	6.38543	0.999993	0.00838781	0.00553565
GOTERM_BP_FAT	GO:0043409~negative regulation of MAPK cascade	6	5.60748	0.00242529	XBP1, IL1B, PRKCD, F2RL1, EZR, TLR4	105	149	16650	6.38543	0.999993	0.00838781	0.00553565
GOTERM_BP_FAT	GO:0007622~rhythmic behavior	4	3.73832	0.00243687	IL6, CSF2, GHRL, TP53	105	43	16650	14.7508	0.999993	0.00840403	0.00554635
GOTERM_BP_FAT	GO:0046850~regulation of bone remodeling	4	3.73832	0.00243687	IL6, CALCA, SRC, EGFR	105	43	16650	14.7508	0.999993	0.00840403	0.00554635
GOTERM_BP_FAT	GO:2000378~negative regulation of reactive oxygen species metabolic process	4	3.73832	0.00243687	IL10, BCL2, HIF1A, HSPD1	105	43	16650	14.7508	0.999993	0.00840403	0.00554635
GOTERM_BP_FAT	GO:0045599~negative regulation of fat cell differentiation	4	3.73832	0.00243687	IL6, TGFB1, SOD2, TNF	105	43	16650	14.7508	0.999993	0.00840403	0.00554635
GOTERM_BP_FAT	GO:0045414~regulation of interleukin-8 biosynthetic process	3	2.80374	0.00244835	TNF, TLR4, ELANE	105	12	16650	39.6429	0.999994	0.00841384	0.00555283
GOTERM_BP_FAT	GO:0042228~interleukin-8 biosynthetic process	3	2.80374	0.00244835	TNF, TLR4, ELANE	105	12	16650	39.6429	0.999994	0.00841384	0.00555283
GOTERM_BP_FAT	GO:0031650~regulation of heat generation	3	2.80374	0.00244835	IL1B, PTGS2, TNF	105	12	16650	39.6429	0.999994	0.00841384	0.00555283
GOTERM_BP_FAT	GO:0043950~positive regulation of cAMP-mediated signaling	3	2.80374	0.00244835	CXCL10, CXCL11, CXCR3	105	12	16650	39.6429	0.999994	0.00841384	0.00555283
GOTERM_BP_FAT	GO:0090335~regulation of brown fat cell differentiation	3	2.80374	0.00244835	MAPK14, PTGS2, INS	105	12	16650	39.6429	0.999994	0.00841384	0.00555283
GOTERM_BP_FAT	GO:0016042~lipid catabolic process	8	7.47664	0.0024614	SGPL1, IL1B, NEU1, PRKCD, PLCG1, TNF, PIK3CG, INS	105	294	16650	4.31487	0.999994	0.00845271	0.00557847
GOTERM_BP_FAT	GO:0098754~detoxification	5	4.6729	0.00253196	ALB, SOD2, PTGS2, TNF, SOD1	105	91	16650	8.71272	0.999996	0.0086889	0.00573435
GOTERM_BP_FAT	GO:0033627~cell adhesion mediated by integrin	4	3.73832	0.00260341	CCL5, PTPN11, ITGA5, ICAM1	105	44	16650	14.4156	0.999997	0.00891526	0.00588374
GOTERM_BP_FAT	GO:0009409~response to cold	4	3.73832	0.00260341	CXCL10, IL6, SOD2, HSPD1	105	44	16650	14.4156	0.999997	0.00891526	0.00588374
GOTERM_BP_FAT	GO:0010828~positive regulation of glucose transport	4	3.73832	0.00260341	PTPN11, MAPK14, NFE2L2, INS	105	44	16650	14.4156	0.999997	0.00891526	0.00588374
GOTERM_BP_FAT	GO:0045786~negative regulation of cell cycle	10	9.34579	0.00270866	IL10, TGFB1, CXCL8, IFNG, BCL2, BAX, MIF, PTGS2, TP53, EGFR	105	470	16650	3.37386	0.999998	0.00926918	0.00611731
GOTERM_BP_FAT	GO:0048469~cell maturation	6	5.60748	0.00271998	APP, XBP1, BCL2, HIF1A, KLF2, VEGFA	105	153	16650	6.21849	0.999998	0.00930139	0.00613857
GOTERM_BP_FAT	GO:0002793~positive regulation of peptide secretion	5	4.6729	0.00273987	GHRL, GLUL, HIF1A, EGFR, INS	105	93	16650	8.52535	0.999998	0.00935626	0.00617479
GOTERM_BP_FAT	GO:0051153~regulation of striated muscle cell differentiation	5	4.6729	0.00273987	CXCL10, XBP1, TGFB1, BCL2, MAPK14	105	93	16650	8.52535	0.999998	0.00935626	0.00617479
GOTERM_BP_FAT	GO:0035987~endodermal cell differentiation	4	3.73832	0.00277681	MMP2, FN1, ITGA5, MMP9	105	45	16650	14.0952	0.999999	0.0094493	0.00623619
GOTERM_BP_FAT	GO:0045840~positive regulation of mitotic nuclear division	4	3.73832	0.00277681	IL1A, TGFB1, IL1B, INS	105	45	16650	14.0952	0.999999	0.0094493	0.00623619
GOTERM_BP_FAT	GO:2000107~negative regulation of leukocyte apoptotic process	4	3.73832	0.00277681	CCL5, MIF, HIF1A, IL2	105	45	16650	14.0952	0.999999	0.0094493	0.00623619
GOTERM_BP_FAT	GO:0043330~response to exogenous dsRNA	4	3.73832	0.00277681	IRF3, IFNA1, IFNB1, TLR3	105	45	16650	14.0952	0.999999	0.0094493	0.00623619
GOTERM_BP_FAT	GO:0038083~peptidyl-tyrosine autophosphorylation	4	3.73832	0.00277681	SRC, FYN, PTK2, VEGFA	105	45	16650	14.0952	0.999999	0.0094493	0.00623619
GOTERM_BP_FAT	GO:0030799~regulation of cyclic nucleotide metabolic process	6	5.60748	0.00279754	CXCL10, CXCL11, CALCA, NOS2, CXCR3, VEGFA	105	154	16650	6.17811	0.999999	0.0095132	0.00627836
GOTERM_BP_FAT	GO:0044802~single-organism membrane organization	14	13.0841	0.00284761	TGFB1, ABCB1, PRKCD, AGER, TNF, EGFR, SOD1, IFNG, BCL2, BAX, CCL2, EZR, TP53, HSPA1A	105	866	16650	2.56351	0.999999	0.00967159	0.00638289
GOTERM_BP_FAT	GO:0009791~post-embryonic development	5	4.6729	0.00284809	SGPL1, BCL2, BAX, SOD2, VEGFA	105	94	16650	8.43465	0.999999	0.00967159	0.00638289
GOTERM_BP_FAT	GO:0006665~sphingolipid metabolic process	6	5.60748	0.00287669	SFTPB, SGPL1, NEU1, PRKCD, BAX, TNF	105	155	16650	6.13825	0.999999	0.00971145	0.0064092
GOTERM_BP_FAT	GO:0034134~toll-like receptor 2 signaling pathway	3	2.80374	0.00288175	F2RL1, HMGB1, TLR2	105	13	16650	36.5934	0.999999	0.00971145	0.0064092
GOTERM_BP_FAT	GO:0032740~positive regulation of interleukin-17 production	3	2.80374	0.00288175	TGFB1, IL18, IL2	105	13	16650	36.5934	0.999999	0.00971145	0.0064092
GOTERM_BP_FAT	GO:0035743~CD4-positive, alpha-beta T cell cytokine production	3	2.80374	0.00288175	IL6, IFNB1, CD55	105	13	16650	36.5934	0.999999	0.00971145	0.0064092
GOTERM_BP_FAT	GO:0030213~hyaluronan biosynthetic process	3	2.80374	0.00288175	TGFB1, IL1B, NFKB1	105	13	16650	36.5934	0.999999	0.00971145	0.0064092
GOTERM_BP_FAT	GO:0043922~negative regulation by host of viral transcription	3	2.80374	0.00288175	JUN, CCL5, CCL4	105	13	16650	36.5934	0.999999	0.00971145	0.0064092
GOTERM_BP_FAT	GO:0071637~regulation of monocyte chemotactic protein-1 production	3	2.80374	0.00288175	IL1A, IL1B, AGER	105	13	16650	36.5934	0.999999	0.00971145	0.0064092
GOTERM_BP_FAT	GO:1900119~positive regulation of execution phase of apoptosis	3	2.80374	0.00288175	CXCR3, BAX, TP53	105	13	16650	36.5934	0.999999	0.00971145	0.0064092
GOTERM_BP_FAT	GO:0071318~cellular response to ATP	3	2.80374	0.00288175	CCL2, PTGS2, SOD1	105	13	16650	36.5934	0.999999	0.00971145	0.0064092
GOTERM_BP_FAT	GO:0051770~positive regulation of nitric-oxide synthase biosynthetic process	3	2.80374	0.00288175	CCL2, TLR4, TLR2	105	13	16650	36.5934	0.999999	0.00971145	0.0064092
GOTERM_BP_FAT	GO:0071605~monocyte chemotactic protein-1 production	3	2.80374	0.00288175	IL1A, IL1B, AGER	105	13	16650	36.5934	0.999999	0.00971145	0.0064092
GOTERM_BP_FAT	GO:1902679~negative regulation of RNA biosynthetic process	17	15.8879	0.00292943	IFITM3, XBP1, JUN, CALCA, TGFB1, SRC, HMGB1, TNF, RELA, NFKB1, VEGFA, IFNG, CCL5, CCL4, EZR, TP53, ELANE	105	1194	16650	2.25772	0.999999	0.00986531	0.00651074
GOTERM_BP_FAT	GO:0045453~bone resorption	4	3.73832	0.00295718	IL6, CALCA, SRC, EGFR	105	46	16650	13.7888	0.999999	0.00993125	0.00655426
GOTERM_BP_FAT	GO:0002381~immunoglobulin production involved in immunoglobulin mediated immune response	4	3.73832	0.00295718	TGFB1, IFNG, IL2, HSPD1	105	46	16650	13.7888	0.999999	0.00993125	0.00655426
GOTERM_BP_FAT	GO:1900047~negative regulation of hemostasis	4	3.73832	0.00295718	PLAU, PRKCD, F2, KNG1	105	46	16650	13.7888	0.999999	0.00993125	0.00655426
GOTERM_BP_FAT	GO:0030195~negative regulation of blood coagulation	4	3.73832	0.00295718	PLAU, PRKCD, F2, KNG1	105	46	16650	13.7888	0.999999	0.00993125	0.00655426
GOTERM_BP_FAT	GO:0045446~endothelial cell differentiation	5	4.6729	0.0029592	IL1B, F2RL1, EZR, TNF, ICAM1	105	95	16650	8.34586	0.999999	0.00993125	0.00655426
GOTERM_BP_FAT	GO:2000146~negative regulation of cell motility	7	6.54206	0.00300583	TGFB1, BCL2, CCL2, HMGB1, FGF2, RHOA, NFE2L2	105	227	16650	4.88987	1	0.0100808	0.00665295
GOTERM_BP_FAT	GO:1903038~negative regulation of leukocyte cell-cell adhesion	5	4.6729	0.00307324	IL10, TGFB1, IFNB1, IL2RA, HMGB1	105	96	16650	8.25893	1	0.0102957	0.00679478
GOTERM_BP_FAT	GO:0010721~negative regulation of cell development	8	7.47664	0.00307413	APP, TGFB1, BCL2, ACTN4, F2, B2M, PTK2, RHOA	105	306	16650	4.14566	1	0.0102957	0.00679478
GOTERM_BP_FAT	GO:0046661~male sex differentiation	6	5.60748	0.00312385	SGPL1, BCL2, BAX, TLR5, TLR3, ICAM1	105	158	16650	6.0217	1	0.010455	0.00689994
GOTERM_BP_FAT	GO:0010976~positive regulation of neuron projection development	7	6.54206	0.00313869	IL6, FN1, FYN, RHOA, IL2, NFE2L2, VEGFA	105	229	16650	4.84716	1	0.0104956	0.00692671
GOTERM_BP_FAT	GO:0072577~endothelial cell apoptotic process	4	3.73832	0.00314459	IL10, XBP1, ICAM1, NFE2L2	105	47	16650	13.4954	1	0.0104956	0.00692671
GOTERM_BP_FAT	GO:0048008~platelet-derived growth factor receptor signaling pathway	4	3.73832	0.00314459	SGPL1, SRC, PTPN11, VEGFA	105	47	16650	13.4954	1	0.0104956	0.00692671
GOTERM_BP_FAT	GO:0034113~heterotypic cell-cell adhesion	4	3.73832	0.00314459	IL10, IL1B, ITGA5, TNF	105	47	16650	13.4954	1	0.0104956	0.00692671
GOTERM_BP_FAT	GO:0030029~actin filament-based process	12	11.215	0.00315788	TGFB1, SRC, PRKCD, BCL2, F2RL1, GHRL, ACTN4, EZR, TNF, RHOA, AQP1, ICAM1	105	672	16650	2.83163	1	0.0105327	0.00695122
GOTERM_BP_FAT	GO:0042303~molting cycle	5	4.6729	0.00319025	BCL2, PTGS2, TNF, RELA, EGFR	105	97	16650	8.17378	1	0.0106189	0.00700809
GOTERM_BP_FAT	GO:0042633~hair cycle	5	4.6729	0.00319025	BCL2, PTGS2, TNF, RELA, EGFR	105	97	16650	8.17378	1	0.0106189	0.00700809
GOTERM_BP_FAT	GO:0051101~regulation of DNA binding	5	4.6729	0.00319025	JUN, TGFB1, HMGB1, AGER, MMP9	105	97	16650	8.17378	1	0.0106189	0.00700809
GOTERM_BP_FAT	GO:0043902~positive regulation of multi-organism process	6	5.60748	0.00320955	JUN, IFNG, NOS2, CCL5, F2RL1, MIF	105	159	16650	5.98383	1	0.0106759	0.00704567
GOTERM_BP_FAT	GO:0019318~hexose metabolic process	7	6.54206	0.00327589	IL6, SRC, GHRL, HMGB1, MAPK14, TNF, INS	105	231	16650	4.80519	1	0.0108891	0.00718641
GOTERM_BP_FAT	GO:1901028~regulation of mitochondrial outer membrane permeabilization involved in apoptotic signaling pathway	4	3.73832	0.00333915	BCL2, BAX, TP53, HSPA1A	105	48	16650	13.2143	1	0.0110621	0.0073006
GOTERM_BP_FAT	GO:0050999~regulation of nitric-oxide synthase activity	4	3.73832	0.00333915	IL1B, HIF1A, EGFR, INS	105	48	16650	13.2143	1	0.0110621	0.0073006
GOTERM_BP_FAT	GO:0010171~body morphogenesis	4	3.73832	0.00333915	SGPL1, TGFB1, MMP2, PTPN11	105	48	16650	13.2143	1	0.0110621	0.0073006
GOTERM_BP_FAT	GO:0060324~face development	4	3.73832	0.00333915	SGPL1, TGFB1, MMP2, PTPN11	105	48	16650	13.2143	1	0.0110621	0.0073006
GOTERM_BP_FAT	GO:0010893~positive regulation of steroid biosynthetic process	3	2.80374	0.00334838	IFNG, IL1B, TNF	105	14	16650	33.9796	1	0.0110621	0.0073006
GOTERM_BP_FAT	GO:0032310~prostaglandin secretion	3	2.80374	0.00334838	NOS2, IL1B, MIF	105	14	16650	33.9796	1	0.0110621	0.0073006
GOTERM_BP_FAT	GO:0045986~negative regulation of smooth muscle contraction	3	2.80374	0.00334838	CALCA, PTGS2, SOD1	105	14	16650	33.9796	1	0.0110621	0.0073006
GOTERM_BP_FAT	GO:0033033~negative regulation of myeloid cell apoptotic process	3	2.80374	0.00334838	CCL5, BCL2, MIF	105	14	16650	33.9796	1	0.0110621	0.0073006
GOTERM_BP_FAT	GO:0007252~I-kappaB phosphorylation	3	2.80374	0.00334838	TLR4, TLR3, TLR2	105	14	16650	33.9796	1	0.0110621	0.0073006
GOTERM_BP_FAT	GO:0072657~protein localization to membrane	10	9.34579	0.00352121	TGFB1, IFNG, BCL2, BAX, CCL2, EZR, AGER, TNF, TP53, EGFR	105	489	16650	3.24277	1	0.0116252	0.00767223
GOTERM_BP_FAT	GO:0032370~positive regulation of lipid transport	4	3.73832	0.00354092	IL1B, PRKCD, GHRL, MIF	105	49	16650	12.9446	1	0.0116587	0.00769433
GOTERM_BP_FAT	GO:0051205~protein insertion into membrane	4	3.73832	0.00354092	BCL2, BAX, TP53, EGFR	105	49	16650	12.9446	1	0.0116587	0.00769433
GOTERM_BP_FAT	GO:0002294~CD4-positive, alpha-beta T cell differentiation involved in immune response	4	3.73832	0.00354092	IL6, IFNG, IL18, HMGB1	105	49	16650	12.9446	1	0.0116587	0.00769433
GOTERM_BP_FAT	GO:0036092~phosphatidylinositol-3-phosphate biosynthetic process	4	3.73832	0.00354092	PTPN11, PIK3CB, FGF2, PIK3CG	105	49	16650	12.9446	1	0.0116587	0.00769433
GOTERM_BP_FAT	GO:2000117~negative regulation of cysteine-type endopeptidase activity	5	4.6729	0.00355945	IL6, SRC, MMP9, AQP1, VEGFA	105	100	16650	7.92857	1	0.0117118	0.00772937
GOTERM_BP_FAT	GO:0010951~negative regulation of endopeptidase activity	7	6.54206	0.00356369	APP, IL6, SRC, MMP9, KNG1, AQP1, VEGFA	105	235	16650	4.7234	1	0.0117178	0.00773334
GOTERM_BP_FAT	GO:0007420~brain development	12	11.215	0.00361155	APP, SRC, CASP3, BCL2, BAX, PTPN11, FYN, HIF1A, FGF2, RHOA, EGFR, AQP1	105	684	16650	2.78195	1	0.0118672	0.00783192
GOTERM_BP_FAT	GO:0009749~response to glucose	6	5.60748	0.00366365	XBP1, TGFB1, CASP3, GLUL, HIF1A, ICAM1	105	164	16650	5.80139	1	0.0120222	0.00793421
GOTERM_BP_FAT	GO:1901617~organic hydroxy compound biosynthetic process	6	5.60748	0.00366365	IFNG, IL1B, TNF, FGF2, NFKB1, SOD1	105	164	16650	5.80139	1	0.0120222	0.00793421
GOTERM_BP_FAT	GO:0050819~negative regulation of coagulation	4	3.73832	0.00375001	PLAU, PRKCD, F2, KNG1	105	50	16650	12.6857	1	0.0122725	0.00809941
GOTERM_BP_FAT	GO:0010518~positive regulation of phospholipase activity	4	3.73832	0.00375001	CCL5, PRKCD, FGF2, EGFR	105	50	16650	12.6857	1	0.0122725	0.00809941
GOTERM_BP_FAT	GO:0002293~alpha-beta T cell differentiation involved in immune response	4	3.73832	0.00375001	IL6, IFNG, IL18, HMGB1	105	50	16650	12.6857	1	0.0122725	0.00809941
GOTERM_BP_FAT	GO:0002287~alpha-beta T cell activation involved in immune response	4	3.73832	0.00375001	IL6, IFNG, IL18, HMGB1	105	50	16650	12.6857	1	0.0122725	0.00809941
GOTERM_BP_FAT	GO:0035729~cellular response to hepatocyte growth factor stimulus	3	2.80374	0.00384782	IL10, IL6, RELA	105	15	16650	31.7143	1	0.0125253	0.00826626
GOTERM_BP_FAT	GO:0031645~negative regulation of neurological system process	3	2.80374	0.00384782	IL10, CALCA, IFNG	105	15	16650	31.7143	1	0.0125253	0.00826626
GOTERM_BP_FAT	GO:1900103~positive regulation of endoplasmic reticulum unfolded protein response	3	2.80374	0.00384782	XBP1, BAX, HSPA1A	105	15	16650	31.7143	1	0.0125253	0.00826626
GOTERM_BP_FAT	GO:0035728~response to hepatocyte growth factor	3	2.80374	0.00384782	IL10, IL6, RELA	105	15	16650	31.7143	1	0.0125253	0.00826626
GOTERM_BP_FAT	GO:0045066~regulatory T cell differentiation	3	2.80374	0.00384782	TGFB1, IFNG, IL2	105	15	16650	31.7143	1	0.0125253	0.00826626
GOTERM_BP_FAT	GO:0042226~interleukin-6 biosynthetic process	3	2.80374	0.00384782	IFNG, IL1B, GHRL	105	15	16650	31.7143	1	0.0125253	0.00826626
GOTERM_BP_FAT	GO:0051044~positive regulation of membrane protein ectodomain proteolysis	3	2.80374	0.00384782	IFNG, IL1B, TNF	105	15	16650	31.7143	1	0.0125253	0.00826626
GOTERM_BP_FAT	GO:0050930~induction of positive chemotaxis	3	2.80374	0.00384782	CXCL8, AGER, VEGFA	105	15	16650	31.7143	1	0.0125253	0.00826626
GOTERM_BP_FAT	GO:0048667~cell morphogenesis involved in neuron differentiation	10	9.34579	0.00386489	APP, BCL2, FN1, PTPN11, FYN, EZR, PTK2, RHOA, SOD1, VEGFA	105	496	16650	3.197	1	0.0125725	0.00829738
GOTERM_BP_FAT	GO:0007631~feeding behavior	5	4.6729	0.00395669	APP, CALCA, FYN, GHRL, INS	105	103	16650	7.69764	1	0.0128625	0.0084888
GOTERM_BP_FAT	GO:0046637~regulation of alpha-beta T cell differentiation	4	3.73832	0.00396648	IL6, IFNG, IL18, HMGB1	105	51	16650	12.437	1	0.0128858	0.00850413
GOTERM_BP_FAT	GO:0010564~regulation of cell cycle process	11	10.2804	0.00404128	IL1A, APP, TGFB1, IL1B, BCL2, BAX, MIF, TP53, RHOA, EGFR, INS	105	595	16650	2.93157	1	0.01312	0.00865874
GOTERM_BP_FAT	GO:0071320~cellular response to cAMP	4	3.73832	0.00419042	APP, EZR, PIK3CG, AQP1	105	52	16650	12.1978	1	0.0135861	0.00896632
GOTERM_BP_FAT	GO:0016445~somatic diversification of immunoglobulins	4	3.73832	0.00419042	TGFB1, IFNG, IL2, HSPD1	105	52	16650	12.1978	1	0.0135861	0.00896632
GOTERM_BP_FAT	GO:0005996~monosaccharide metabolic process	7	6.54206	0.00419527	IL6, SRC, GHRL, HMGB1, MAPK14, TNF, INS	105	243	16650	4.5679	1	0.0135928	0.00897073
GOTERM_BP_FAT	GO:0051253~negative regulation of RNA metabolic process	17	15.8879	0.00424306	IFITM3, XBP1, JUN, CALCA, TGFB1, SRC, HMGB1, TNF, RELA, NFKB1, VEGFA, IFNG, CCL5, CCL4, EZR, TP53, ELANE	105	1240	16650	2.17396	1	0.0137385	0.00906691
GOTERM_BP_FAT	GO:0022402~cell cycle process	18	16.8224	0.00430344	APP, TGFB1, CXCL8, ABCB1, PTPN11, MIF, MAPK14, RHOA, EGFR, INS, PTPA, IL1A, IFNG, IL1B, BCL2, BAX, EZR, TP53	105	1357	16650	2.10338	1	0.0139247	0.00918981
GOTERM_BP_FAT	GO:0007409~axonogenesis	9	8.41121	0.00434342	APP, BCL2, FN1, PTPN11, FYN, EZR, PTK2, RHOA, VEGFA	105	413	16650	3.45555	1	0.0140355	0.00926289
GOTERM_BP_FAT	GO:0010975~regulation of neuron projection development	9	8.41121	0.00434342	IL6, FN1, FYN, B2M, PTK2, RHOA, IL2, NFE2L2, VEGFA	105	413	16650	3.45555	1	0.0140355	0.00926289
GOTERM_BP_FAT	GO:0008217~regulation of blood pressure	6	5.60748	0.00437455	CALCA, NOS2, F2RL1, SOD2, PTGS2, SOD1	105	171	16650	5.56391	1	0.0140779	0.00929088
GOTERM_BP_FAT	GO:0031065~positive regulation of histone deacetylation	3	2.80374	0.00437966	TGFB1, TP53, VEGFA	105	16	16650	29.7321	1	0.0140779	0.00929088
GOTERM_BP_FAT	GO:0010744~positive regulation of macrophage derived foam cell differentiation	3	2.80374	0.00437966	CSF2, IL18, NFKB1	105	16	16650	29.7321	1	0.0140779	0.00929088
GOTERM_BP_FAT	GO:0045408~regulation of interleukin-6 biosynthetic process	3	2.80374	0.00437966	IFNG, IL1B, GHRL	105	16	16650	29.7321	1	0.0140779	0.00929088
GOTERM_BP_FAT	GO:0032075~positive regulation of nuclease activity	3	2.80374	0.00437966	PRKCD, BAX, HSPA1A	105	16	16650	29.7321	1	0.0140779	0.00929088
GOTERM_BP_FAT	GO:0001774~microglial cell activation	3	2.80374	0.00437966	JUN, TLR3, TLR2	105	16	16650	29.7321	1	0.0140779	0.00929088
GOTERM_BP_FAT	GO:0019430~removal of superoxide radicals	3	2.80374	0.00437966	SOD2, TNF, SOD1	105	16	16650	29.7321	1	0.0140779	0.00929088
GOTERM_BP_FAT	GO:0045589~regulation of regulatory T cell differentiation	3	2.80374	0.00437966	TGFB1, IFNG, IL2	105	16	16650	29.7321	1	0.0140779	0.00929088
GOTERM_BP_FAT	GO:1902117~positive regulation of organelle assembly	4	3.73832	0.00442189	CSF2, IL5, SRC, TNF	105	53	16650	11.9677	1	0.0141856	0.00936195
GOTERM_BP_FAT	GO:0045600~positive regulation of fat cell differentiation	4	3.73832	0.00442189	XBP1, MAPK14, PTGS2, INS	105	53	16650	11.9677	1	0.0141856	0.00936195
GOTERM_BP_FAT	GO:0046635~positive regulation of alpha-beta T cell activation	4	3.73832	0.00442189	IL6, IFNG, IL18, CD55	105	53	16650	11.9677	1	0.0141856	0.00936195
GOTERM_BP_FAT	GO:0006974~cellular response to DNA damage stimulus	13	12.1495	0.00446799	PRKCD, ISG15, PTPN11, HMGB1, MIF, MAPK14, SOD2, TNF, EGFR, IRF3, BCL2, BAX, TP53	105	807	16650	2.55443	1	0.014324	0.00945332
GOTERM_BP_FAT	GO:0030801~positive regulation of cyclic nucleotide metabolic process	5	4.6729	0.00453164	CXCL10, CXCL11, CALCA, NOS2, CXCR3	105	107	16650	7.40988	1	0.0145185	0.00958169
GOTERM_BP_FAT	GO:0010466~negative regulation of peptidase activity	7	6.54206	0.00454047	APP, IL6, SRC, MMP9, KNG1, AQP1, VEGFA	105	247	16650	4.49393	1	0.0145372	0.00959405
GOTERM_BP_FAT	GO:0001706~endoderm formation	4	3.73832	0.00466098	MMP2, FN1, ITGA5, MMP9	105	54	16650	11.746	1	0.014884	0.00982288
GOTERM_BP_FAT	GO:0097345~mitochondrial outer membrane permeabilization	4	3.73832	0.00466098	BCL2, BAX, TP53, HSPA1A	105	54	16650	11.746	1	0.014884	0.00982288
GOTERM_BP_FAT	GO:0002753~cytoplasmic pattern recognition receptor signaling pathway	4	3.73832	0.00466098	IRF3, TLR4, RELA, HSPA1A	105	54	16650	11.746	1	0.014884	0.00982288
GOTERM_BP_FAT	GO:0010633~negative regulation of epithelial cell migration	4	3.73832	0.00466098	TGFB1, HMGB1, FGF2, RHOA	105	54	16650	11.746	1	0.014884	0.00982288
GOTERM_BP_FAT	GO:0007507~heart development	10	9.34579	0.00469006	JUN, TGFB1, PTPN11, MAPK14, SOD2, HIF1A, FGF2, PTK2, EGFR, VEGFA	105	511	16650	3.10316	1	0.014967	0.0098777
GOTERM_BP_FAT	GO:0050806~positive regulation of synaptic transmission	5	4.6729	0.00483916	IFNG, CCL2, PTGS2, GLUL, EGFR	105	109	16650	7.27392	1	0.0154327	0.010185
GOTERM_BP_FAT	GO:1902110~positive regulation of mitochondrial membrane permeability involved in apoptotic process	4	3.73832	0.00490776	BCL2, BAX, TP53, HSPA1A	105	55	16650	11.5325	1	0.0156208	0.0103092
GOTERM_BP_FAT	GO:1902686~mitochondrial outer membrane permeabilization involved in programmed cell death	4	3.73832	0.00490776	BCL2, BAX, TP53, HSPA1A	105	55	16650	11.5325	1	0.0156208	0.0103092
GOTERM_BP_FAT	GO:0071230~cellular response to amino acid stimulus	4	3.73832	0.00490776	XBP1, MMP2, TNF, EGFR	105	55	16650	11.5325	1	0.0156208	0.0103092
GOTERM_BP_FAT	GO:0030324~lung development	6	5.60748	0.00493917	HMGB1, TNF, FGF2, EGFR, KLF2, VEGFA	105	176	16650	5.40584	1	0.0156527	0.0103302
GOTERM_BP_FAT	GO:0042533~tumor necrosis factor biosynthetic process	3	2.80374	0.00494347	IL10, GHRL, TLR4	105	17	16650	27.9832	1	0.0156527	0.0103302
GOTERM_BP_FAT	GO:0006309~apoptotic DNA fragmentation	3	2.80374	0.00494347	CASP3, BAX, HMGB1	105	17	16650	27.9832	1	0.0156527	0.0103302
GOTERM_BP_FAT	GO:0051767~nitric-oxide synthase biosynthetic process	3	2.80374	0.00494347	CCL2, TLR4, TLR2	105	17	16650	27.9832	1	0.0156527	0.0103302
GOTERM_BP_FAT	GO:0070234~positive regulation of T cell apoptotic process	3	2.80374	0.00494347	CCL5, TP53, ICAM1	105	17	16650	27.9832	1	0.0156527	0.0103302
GOTERM_BP_FAT	GO:0051769~regulation of nitric-oxide synthase biosynthetic process	3	2.80374	0.00494347	CCL2, TLR4, TLR2	105	17	16650	27.9832	1	0.0156527	0.0103302
GOTERM_BP_FAT	GO:0015732~prostaglandin transport	3	2.80374	0.00494347	NOS2, IL1B, MIF	105	17	16650	27.9832	1	0.0156527	0.0103302
GOTERM_BP_FAT	GO:0010888~negative regulation of lipid storage	3	2.80374	0.00494347	CRP, IL6, TNF	105	17	16650	27.9832	1	0.0156527	0.0103302
GOTERM_BP_FAT	GO:0016311~dephosphorylation	9	8.41121	0.00507737	PTPA, PTPRB, TGFB1, IFNG, RIPK3, PRKCD, BCL2, PTPN11, TNF	105	424	16650	3.3659	1	0.0160663	0.0106031
GOTERM_BP_FAT	GO:0055076~transition metal ion homeostasis	5	4.6729	0.00516041	APP, SOD2, HIF1A, B2M, SOD1	105	111	16650	7.14286	1	0.0163032	0.0107595
GOTERM_BP_FAT	GO:0002292~T cell differentiation involved in immune response	4	3.73832	0.00516228	IL6, IFNG, IL18, HMGB1	105	56	16650	11.3265	1	0.0163032	0.0107595
GOTERM_BP_FAT	GO:0051785~positive regulation of nuclear division	4	3.73832	0.00516228	IL1A, TGFB1, IL1B, INS	105	56	16650	11.3265	1	0.0163032	0.0107595
GOTERM_BP_FAT	GO:0009150~purine ribonucleotide metabolic process	10	9.34579	0.00524754	CXCL10, CXCL11, CALCA, TGFB1, NOS2, CXCR3, HIF1A, AQP1, HSPA1A, INS	105	520	16650	3.04945	1	0.0165617	0.0109301
GOTERM_BP_FAT	GO:0051172~negative regulation of nitrogen compound metabolic process	19	17.757	0.00537722	IL10, IFITM3, XBP1, JUN, CALCA, TGFB1, SRC, HMGB1, TNF, EGFR, RELA, NFKB1, VEGFA, IFNG, CCL5, CCL4, EZR, TP53, ELANE	105	1506	16650	2.00057	1	0.01696	0.011193
GOTERM_BP_FAT	GO:0006470~protein dephosphorylation	7	6.54206	0.00539339	PTPA, PTPRB, TGFB1, PRKCD, BCL2, PTPN11, TNF	105	256	16650	4.33594	1	0.017	0.0112194
GOTERM_BP_FAT	GO:0035794~positive regulation of mitochondrial membrane permeability	4	3.73832	0.00542463	BCL2, BAX, TP53, HSPA1A	105	57	16650	11.1278	1	0.017072	0.0112669
GOTERM_BP_FAT	GO:0010830~regulation of myotube differentiation	4	3.73832	0.00542463	CXCL10, XBP1, BCL2, MAPK14	105	57	16650	11.1278	1	0.017072	0.0112669
GOTERM_BP_FAT	GO:0030323~respiratory tube development	6	5.60748	0.00542674	HMGB1, TNF, FGF2, EGFR, KLF2, VEGFA	105	180	16650	5.28571	1	0.017072	0.0112669
GOTERM_BP_FAT	GO:0008286~insulin receptor signaling pathway	5	4.6729	0.00549567	SRC, IL1B, PRKCD, RELA, INS	105	113	16650	7.01643	1	0.0172777	0.0114026
GOTERM_BP_FAT	GO:0071451~cellular response to superoxide	3	2.80374	0.00553885	SOD2, TNF, SOD1	105	18	16650	26.4286	1	0.0173463	0.0114479
GOTERM_BP_FAT	GO:0036120~cellular response to platelet-derived growth factor stimulus	3	2.80374	0.00553885	SRC, CCL2, FYN	105	18	16650	26.4286	1	0.0173463	0.0114479
GOTERM_BP_FAT	GO:0031293~membrane protein intracellular domain proteolysis	3	2.80374	0.00553885	TGFB1, RELA, NFKB1	105	18	16650	26.4286	1	0.0173463	0.0114479
GOTERM_BP_FAT	GO:0010523~negative regulation of calcium ion transport into cytosol	3	2.80374	0.00553885	CALCA, TGFB1, BCL2	105	18	16650	26.4286	1	0.0173463	0.0114479
GOTERM_BP_FAT	GO:1900120~regulation of receptor binding	3	2.80374	0.00553885	IL10, B2M, MMP9	105	18	16650	26.4286	1	0.0173463	0.0114479
GOTERM_BP_FAT	GO:0071450~cellular response to oxygen radical	3	2.80374	0.00553885	SOD2, TNF, SOD1	105	18	16650	26.4286	1	0.0173463	0.0114479
GOTERM_BP_FAT	GO:0001658~branching involved in ureteric bud morphogenesis	4	3.73832	0.00569487	TGFB1, BCL2, FGF2, VEGFA	105	58	16650	10.936	1	0.0178234	0.0117628
GOTERM_BP_FAT	GO:0055086~nucleobase-containing small molecule metabolic process	12	11.215	0.00574248	CXCL10, CXCL11, CALCA, TGFB1, TTR, NOS2, CXCR3, HIF1A, AQP1, HSPA1A, INS, VEGFA	105	728	16650	2.61381	1	0.0179609	0.0118535
GOTERM_BP_FAT	GO:0051216~cartilage development	6	5.60748	0.0058141	TGFB1, GHRL, MAPK14, HIF1A, FGF2, RELA	105	183	16650	5.19906	1	0.0181733	0.0119937
GOTERM_BP_FAT	GO:0030522~intracellular receptor signaling pathway	7	6.54206	0.00591517	IRF3, SRC, ACTN4, DEFA1, TLR4, RELA, HSPA1A	105	261	16650	4.25287	1	0.0184773	0.0121944
GOTERM_BP_FAT	GO:0043367~CD4-positive, alpha-beta T cell differentiation	4	3.73832	0.00597305	IL6, IFNG, IL18, HMGB1	105	59	16650	10.7506	1	0.0186342	0.0122979
GOTERM_BP_FAT	GO:0032623~interleukin-2 production	4	3.73832	0.00597305	IL1A, IL1B, IL18, EZR	105	59	16650	10.7506	1	0.0186342	0.0122979
GOTERM_BP_FAT	GO:0030258~lipid modification	7	6.54206	0.00602381	PTPN11, FYN, PIK3CB, MAPK14, FGF2, EGFR, PIK3CG	105	262	16650	4.23664	1	0.0187806	0.0123945
GOTERM_BP_FAT	GO:0070242~thymocyte apoptotic process	3	2.80374	0.00616538	BAX, HIF1A, TP53	105	19	16650	25.0376	1	0.0190998	0.0126051
GOTERM_BP_FAT	GO:0046716~muscle cell cellular homeostasis	3	2.80374	0.00616538	IL6, HIF1A, SOD1	105	19	16650	25.0376	1	0.0190998	0.0126051
GOTERM_BP_FAT	GO:0042534~regulation of tumor necrosis factor biosynthetic process	3	2.80374	0.00616538	IL10, GHRL, TLR4	105	19	16650	25.0376	1	0.0190998	0.0126051
GOTERM_BP_FAT	GO:0090049~regulation of cell migration involved in sprouting angiogenesis	3	2.80374	0.00616538	PTGS2, RHOA, VEGFA	105	19	16650	25.0376	1	0.0190998	0.0126051
GOTERM_BP_FAT	GO:2000482~regulation of interleukin-8 secretion	3	2.80374	0.00616538	CRP, F2RL1, CAMP	105	19	16650	25.0376	1	0.0190998	0.0126051
GOTERM_BP_FAT	GO:0034104~negative regulation of tissue remodeling	3	2.80374	0.00616538	IL6, CALCA, AGER	105	19	16650	25.0376	1	0.0190998	0.0126051
GOTERM_BP_FAT	GO:0034114~regulation of heterotypic cell-cell adhesion	3	2.80374	0.00616538	IL10, IL1B, TNF	105	19	16650	25.0376	1	0.0190998	0.0126051
GOTERM_BP_FAT	GO:0045830~positive regulation of isotype switching	3	2.80374	0.00616538	TGFB1, IFNG, IL2	105	19	16650	25.0376	1	0.0190998	0.0126051
GOTERM_BP_FAT	GO:0042832~defense response to protozoan	3	2.80374	0.00616538	IL10, IL6, IFNG	105	19	16650	25.0376	1	0.0190998	0.0126051
GOTERM_BP_FAT	GO:0036119~response to platelet-derived growth factor	3	2.80374	0.00616538	SRC, CCL2, FYN	105	19	16650	25.0376	1	0.0190998	0.0126051
GOTERM_BP_FAT	GO:0051961~negative regulation of nervous system development	7	6.54206	0.00624544	APP, TGFB1, IFNG, F2, B2M, PTK2, RHOA	105	264	16650	4.20455	1	0.0193355	0.0127607
GOTERM_BP_FAT	GO:1902108~regulation of mitochondrial membrane permeability involved in apoptotic process	4	3.73832	0.00625924	BCL2, BAX, TP53, HSPA1A	105	60	16650	10.5714	1	0.0193659	0.0127808
GOTERM_BP_FAT	GO:0009259~ribonucleotide metabolic process	10	9.34579	0.00628986	CXCL10, CXCL11, CALCA, TGFB1, NOS2, CXCR3, HIF1A, AQP1, HSPA1A, INS	105	535	16650	2.96395	1	0.0194483	0.0128351
GOTERM_BP_FAT	GO:0098662~inorganic cation transmembrane transport	11	10.2804	0.00633699	CXCL10, CXCL11, TGFB1, CXCR3, BAX, ACTN4, PLCG1, CCR5, F2, FGF2, AQP1	105	635	16650	2.74691	1	0.0195816	0.0129231
GOTERM_BP_FAT	GO:0048634~regulation of muscle organ development	5	4.6729	0.00639681	IL6, TGFB1, BCL2, MAPK14, FGF2	105	118	16650	6.71913	1	0.0197539	0.0130369
GOTERM_BP_FAT	GO:0001822~kidney development	7	6.54206	0.00658896	SGPL1, TGFB1, IFNG, BCL2, BAX, FGF2, VEGFA	105	267	16650	4.1573	1	0.0203344	0.0134199
GOTERM_BP_FAT	GO:0032535~regulation of cellular component size	8	7.47664	0.00675676	PRKCD, FN1, F2RL1, AQP5, EZR, AQP1, ICAM1, VEGFA	105	354	16650	3.58354	1	0.020839	0.013753
GOTERM_BP_FAT	GO:0045187~regulation of circadian sleep/wake cycle, sleep	3	2.80374	0.00682267	IL6, CSF2, GHRL	105	20	16650	23.7857	1	0.0209582	0.0138316
GOTERM_BP_FAT	GO:0009651~response to salt stress	3	2.80374	0.00682267	BAX, TNF, AQP1	105	20	16650	23.7857	1	0.0209582	0.0138316
GOTERM_BP_FAT	GO:0042094~interleukin-2 biosynthetic process	3	2.80374	0.00682267	IL1A, IL1B, IL18	105	20	16650	23.7857	1	0.0209582	0.0138316
GOTERM_BP_FAT	GO:0035162~embryonic hemopoiesis	3	2.80374	0.00682267	IL3, HIF1A, VEGFA	105	20	16650	23.7857	1	0.0209582	0.0138316
GOTERM_BP_FAT	GO:0051968~positive regulation of synaptic transmission, glutamatergic	3	2.80374	0.00682267	PTGS2, GLUL, EGFR	105	20	16650	23.7857	1	0.0209582	0.0138316
GOTERM_BP_FAT	GO:1902932~positive regulation of alcohol biosynthetic process	3	2.80374	0.00682267	IFNG, IL1B, TNF	105	20	16650	23.7857	1	0.0209582	0.0138316
GOTERM_BP_FAT	GO:0010506~regulation of autophagy	7	6.54206	0.00682549	XBP1, IFNG, CASP3, BCL2, HMGB1, PIK3CB, HIF1A	105	269	16650	4.12639	1	0.0209582	0.0138316
GOTERM_BP_FAT	GO:0031644~regulation of neurological system process	4	3.73832	0.00685587	IL10, IL6, CALCA, IFNG	105	62	16650	10.2304	1	0.021025	0.0138757
GOTERM_BP_FAT	GO:0010517~regulation of phospholipase activity	4	3.73832	0.00685587	CCL5, PRKCD, FGF2, EGFR	105	62	16650	10.2304	1	0.021025	0.0138757
GOTERM_BP_FAT	GO:0048812~neuron projection morphogenesis	10	9.34579	0.00690758	APP, BCL2, FN1, PTPN11, FYN, EZR, PTK2, RHOA, EGFR, VEGFA	105	543	16650	2.92028	1	0.0211702	0.0139716
GOTERM_BP_FAT	GO:0034220~ion transmembrane transport	14	13.0841	0.00691586	TGFB1, AQP5, ACTN4, F2, FGF2, MMP9, PIK3CG, AQP1, CXCL10, CXCL11, CXCR3, BAX, PLCG1, CCR5	105	963	16650	2.3053	1	0.0211823	0.0139795
GOTERM_BP_FAT	GO:0000122~negative regulation of transcription from RNA polymerase II promoter	12	11.215	0.00699325	XBP1, JUN, TGFB1, IFNG, HMGB1, EZR, TNF, TP53, RELA, NFKB1, ELANE, VEGFA	105	748	16650	2.54393	1	0.0214058	0.0141271
GOTERM_BP_FAT	GO:0007160~cell-matrix adhesion	6	5.60748	0.00709291	PLAU, SRC, BCL2, FN1, PTK2, VEGFA	105	192	16650	4.95536	1	0.0216973	0.0143194
GOTERM_BP_FAT	GO:0061180~mammary gland epithelium development	4	3.73832	0.00716642	TGFB1, SRC, HIF1A, FGF2	105	63	16650	10.068	1	0.0218809	0.0144406
GOTERM_BP_FAT	GO:0000018~regulation of DNA recombination	4	3.73832	0.00716642	IL10, TGFB1, IFNG, IL2	105	63	16650	10.068	1	0.0218809	0.0144406
GOTERM_BP_FAT	GO:0050795~regulation of behavior	4	3.73832	0.00716642	IL6, CSF2, GHRL, INS	105	63	16650	10.068	1	0.0218809	0.0144406
GOTERM_BP_FAT	GO:0000278~mitotic cell cycle	14	13.0841	0.00721156	IL10, APP, TGFB1, ABCB1, PTPN11, RHOA, EGFR, INS, PTPA, IL1A, IL1B, BCL2, BAX, TP53	105	968	16650	2.29339	1	0.022005	0.0145225
GOTERM_BP_FAT	GO:0019693~ribose phosphate metabolic process	10	9.34579	0.00740077	CXCL10, CXCL11, CALCA, TGFB1, NOS2, CXCR3, HIF1A, AQP1, HSPA1A, INS	105	549	16650	2.88837	1	0.0225682	0.0148942
GOTERM_BP_FAT	GO:0060675~ureteric bud morphogenesis	4	3.73832	0.00748521	TGFB1, BCL2, FGF2, VEGFA	105	64	16650	9.91071	1	0.0227739	0.01503
GOTERM_BP_FAT	GO:0001562~response to protozoan	3	2.80374	0.0075103	IL10, IL6, IFNG	105	21	16650	22.6531	1	0.0227739	0.01503
GOTERM_BP_FAT	GO:0036499~PERK-mediated unfolded protein response	3	2.80374	0.0075103	CXCL8, CCL2, NFE2L2	105	21	16650	22.6531	1	0.0227739	0.01503
GOTERM_BP_FAT	GO:0000737~DNA catabolic process, endonucleolytic	3	2.80374	0.0075103	CASP3, BAX, HMGB1	105	21	16650	22.6531	1	0.0227739	0.01503
GOTERM_BP_FAT	GO:0048011~neurotrophin TRK receptor signaling pathway	3	2.80374	0.0075103	SRC, CASP3, PTPN11	105	21	16650	22.6531	1	0.0227739	0.01503
GOTERM_BP_FAT	GO:0072606~interleukin-8 secretion	3	2.80374	0.0075103	NOS2, F2RL1, CAMP	105	21	16650	22.6531	1	0.0227739	0.01503
GOTERM_BP_FAT	GO:0000303~response to superoxide	3	2.80374	0.0075103	SOD2, TNF, SOD1	105	21	16650	22.6531	1	0.0227739	0.01503
GOTERM_BP_FAT	GO:0045911~positive regulation of DNA recombination	3	2.80374	0.0075103	TGFB1, IFNG, IL2	105	21	16650	22.6531	1	0.0227739	0.01503
GOTERM_BP_FAT	GO:0033141~positive regulation of peptidyl-serine phosphorylation of STAT protein	3	2.80374	0.0075103	IFNG, IFNA1, IFNB1	105	21	16650	22.6531	1	0.0227739	0.01503
GOTERM_BP_FAT	GO:0015850~organic hydroxy compound transport	6	5.60748	0.00755968	ALB, PTPN11, GHRL, AQP5, NFKB1, AQP1	105	195	16650	4.87912	1	0.0229094	0.0151194
GOTERM_BP_FAT	GO:0042692~muscle cell differentiation	8	7.47664	0.00759933	CXCL10, XBP1, TGFB1, BCL2, IL18, MAPK14, TNF, VEGFA	105	362	16650	3.50434	1	0.0230077	0.0151842
GOTERM_BP_FAT	GO:0035264~multicellular organism growth	5	4.6729	0.00760156	BCL2, PTPN11, GHRL, EZR, KLF2	105	124	16650	6.39401	1	0.0230077	0.0151842
GOTERM_BP_FAT	GO:0055085~transmembrane transport	17	15.8879	0.00777576	TGFB1, ABCB1, AQP5, ACTN4, F2, FGF2, MMP9, PIK3CG, AQP1, INS, CXCL10, CXCL11, CXCR3, BCL2, BAX, PLCG1, CCR5	105	1322	16650	2.03912	1	0.0235203	0.0155226
GOTERM_BP_FAT	GO:0072171~mesonephric tubule morphogenesis	4	3.73832	0.00781227	TGFB1, BCL2, FGF2, VEGFA	105	65	16650	9.75824	1	0.0235723	0.0155568
GOTERM_BP_FAT	GO:0032945~negative regulation of mononuclear cell proliferation	4	3.73832	0.00781227	IL10, TGFB1, IL2RA, IL2	105	65	16650	9.75824	1	0.0235723	0.0155568
GOTERM_BP_FAT	GO:0046888~negative regulation of hormone secretion	4	3.73832	0.00781227	IL6, IL1B, PTPN11, GHRL	105	65	16650	9.75824	1	0.0235723	0.0155568
GOTERM_BP_FAT	GO:0050672~negative regulation of lymphocyte proliferation	4	3.73832	0.00781227	IL10, TGFB1, IL2RA, IL2	105	65	16650	9.75824	1	0.0235723	0.0155568
GOTERM_BP_FAT	GO:0044723~single-organism carbohydrate metabolic process	11	10.2804	0.00789464	IL6, TGFB1, SRC, NEU1, GHRL, HMGB1, MAPK14, HIF1A, TNF, NFKB1, INS	105	656	16650	2.65897	1	0.0238061	0.0157111
GOTERM_BP_FAT	GO:0046782~regulation of viral transcription	4	3.73832	0.00814766	IFITM3, JUN, CCL5, CCL4	105	66	16650	9.61039	1	0.0245235	0.0161846
GOTERM_BP_FAT	GO:0048636~positive regulation of muscle organ development	4	3.73832	0.00814766	TGFB1, BCL2, MAPK14, FGF2	105	66	16650	9.61039	1	0.0245235	0.0161846
GOTERM_BP_FAT	GO:0045844~positive regulation of striated muscle tissue development	4	3.73832	0.00814766	TGFB1, BCL2, MAPK14, FGF2	105	66	16650	9.61039	1	0.0245235	0.0161846
GOTERM_BP_FAT	GO:0046488~phosphatidylinositol metabolic process	6	5.60748	0.00821483	PTPN11, FYN, PIK3CB, FGF2, EGFR, PIK3CG	105	199	16650	4.78105	1	0.0246736	0.0162836
GOTERM_BP_FAT	GO:0002724~regulation of T cell cytokine production	3	2.80374	0.00822789	IL6, IFNB1, B2M	105	22	16650	21.6234	1	0.0246736	0.0162836
GOTERM_BP_FAT	GO:0033139~regulation of peptidyl-serine phosphorylation of STAT protein	3	2.80374	0.00822789	IFNG, IFNA1, IFNB1	105	22	16650	21.6234	1	0.0246736	0.0162836
GOTERM_BP_FAT	GO:0032469~endoplasmic reticulum calcium ion homeostasis	3	2.80374	0.00822789	APP, BCL2, BAX	105	22	16650	21.6234	1	0.0246736	0.0162836
GOTERM_BP_FAT	GO:0042749~regulation of circadian sleep/wake cycle	3	2.80374	0.00822789	IL6, CSF2, GHRL	105	22	16650	21.6234	1	0.0246736	0.0162836
GOTERM_BP_FAT	GO:0002544~chronic inflammatory response	3	2.80374	0.00822789	IL10, TNF, CAMP	105	22	16650	21.6234	1	0.0246736	0.0162836
GOTERM_BP_FAT	GO:0090150~establishment of protein localization to membrane	8	7.47664	0.00828065	IFNG, BCL2, BAX, CCL2, EZR, TNF, TP53, EGFR	105	368	16650	3.4472	1	0.0248165	0.016378
GOTERM_BP_FAT	GO:1901863~positive regulation of muscle tissue development	4	3.73832	0.00849143	TGFB1, BCL2, MAPK14, FGF2	105	67	16650	9.46695	1	0.0254325	0.0167845
GOTERM_BP_FAT	GO:0072001~renal system development	7	6.54206	0.00865734	SGPL1, TGFB1, IFNG, BCL2, BAX, FGF2, VEGFA	105	283	16650	3.92226	1	0.0259135	0.017102
GOTERM_BP_FAT	GO:0009117~nucleotide metabolic process	11	10.2804	0.00882103	CXCL10, CXCL11, CALCA, TGFB1, NOS2, CXCR3, HIF1A, AQP1, HSPA1A, INS, VEGFA	105	667	16650	2.61512	1	0.0263873	0.0174146
GOTERM_BP_FAT	GO:0034644~cellular response to UV	4	3.73832	0.00884361	BAX, PTGS2, TP53, AQP1	105	68	16650	9.32773	1	0.0264386	0.0174485
GOTERM_BP_FAT	GO:0060541~respiratory system development	6	5.60748	0.00890847	HMGB1, TNF, FGF2, EGFR, KLF2, VEGFA	105	203	16650	4.68684	1	0.0266162	0.0175657
GOTERM_BP_FAT	GO:0043603~cellular amide metabolic process	14	13.0841	0.00891575	APP, TGFB1, PRKCD, F2, PTGS2, SOD2, TNF, EGFR, SOD1, SGPL1, IL6, CCL5, NEU1, NFE2L2	105	994	16650	2.2334	1	0.0266216	0.0175693
GOTERM_BP_FAT	GO:0044344~cellular response to fibroblast growth factor stimulus	5	4.6729	0.00894709	CXCL8, CCL5, CCL2, PTPN11, FGF2	105	130	16650	6.0989	1	0.0266988	0.0176202
GOTERM_BP_FAT	GO:0032967~positive regulation of collagen biosynthetic process	3	2.80374	0.00897504	TGFB1, CCL2, F2	105	23	16650	20.6832	1	0.0267005	0.0176213
GOTERM_BP_FAT	GO:0043949~regulation of cAMP-mediated signaling	3	2.80374	0.00897504	CXCL10, CXCL11, CXCR3	105	23	16650	20.6832	1	0.0267005	0.0176213
GOTERM_BP_FAT	GO:0014002~astrocyte development	3	2.80374	0.00897504	AGER, TLR4, EGFR	105	23	16650	20.6832	1	0.0267005	0.0176213
GOTERM_BP_FAT	GO:0001914~regulation of T cell mediated cytotoxicity	3	2.80374	0.00897504	RIPK3, AGER, B2M	105	23	16650	20.6832	1	0.0267005	0.0176213
GOTERM_BP_FAT	GO:0030149~sphingolipid catabolic process	3	2.80374	0.00897504	SGPL1, NEU1, PRKCD	105	23	16650	20.6832	1	0.0267005	0.0176213
GOTERM_BP_FAT	GO:0034248~regulation of cellular amide metabolic process	8	7.47664	0.00900612	APP, IL6, TGFB1, CCL5, PRKCD, TNF, EGFR, NFE2L2	105	374	16650	3.3919	1	0.0267766	0.0176716
GOTERM_BP_FAT	GO:0006643~membrane lipid metabolic process	6	5.60748	0.00908802	SFTPB, SGPL1, NEU1, PRKCD, BAX, TNF	105	204	16650	4.66387	1	0.0269707	0.0177997
GOTERM_BP_FAT	GO:0033500~carbohydrate homeostasis	6	5.60748	0.00908802	IL6, XBP1, PTPN11, HIF1A, ICAM1, INS	105	204	16650	4.66387	1	0.0269707	0.0177997
GOTERM_BP_FAT	GO:0042593~glucose homeostasis	6	5.60748	0.00908802	IL6, XBP1, PTPN11, HIF1A, ICAM1, INS	105	204	16650	4.66387	1	0.0269707	0.0177997
GOTERM_BP_FAT	GO:0070664~negative regulation of leukocyte proliferation	4	3.73832	0.00920426	IL10, TGFB1, IL2RA, IL2	105	69	16650	9.19255	1	0.0272825	0.0180054
GOTERM_BP_FAT	GO:0071594~thymocyte aggregation	4	3.73832	0.00920426	RIPK3, BCL2, B2M, SOD1	105	69	16650	9.19255	1	0.0272825	0.0180054
GOTERM_BP_FAT	GO:0043010~camera-type eye development	7	6.54206	0.0093899	JUN, TGFB1, BAX, AQP5, HIF1A, EGFR, VEGFA	105	288	16650	3.85417	1	0.0278158	0.0183574
GOTERM_BP_FAT	GO:0006766~vitamin metabolic process	5	4.6729	0.00942796	IFNG, IL1B, PTGS2, TNF, NFKB1	105	132	16650	6.00649	1	0.0279116	0.0184206
GOTERM_BP_FAT	GO:0048598~embryonic morphogenesis	10	9.34579	0.00944374	IL10, TGFB1, MMP2, FN1, BAX, ITGA5, HIF1A, FGF2, MMP9, SOD1	105	571	16650	2.77708	1	0.0279372	0.0184375
GOTERM_BP_FAT	GO:0010608~posttranscriptional regulation of gene expression	9	8.41121	0.00944809	APP, IL6, TGFB1, CCL5, PRKCD, MAPK14, TNF, EGFR, HSPA1A	105	472	16650	3.02361	1	0.0279372	0.0184375
GOTERM_BP_FAT	GO:0006753~nucleoside phosphate metabolic process	11	10.2804	0.00954584	CXCL10, CXCL11, CALCA, TGFB1, NOS2, CXCR3, HIF1A, AQP1, HSPA1A, INS, VEGFA	105	675	16650	2.58413	1	0.0282091	0.018617
GOTERM_BP_FAT	GO:0046902~regulation of mitochondrial membrane permeability	4	3.73832	0.00957341	BCL2, BAX, TP53, HSPA1A	105	70	16650	9.06122	1	0.0282735	0.0186594
GOTERM_BP_FAT	GO:0006260~DNA replication	7	6.54206	0.00969499	IL3, IL6, JUN, TGFB1, CSF2, EGFR, INS	105	290	16650	3.82759	1	0.0285911	0.0188691
GOTERM_BP_FAT	GO:0010714~positive regulation of collagen metabolic process	3	2.80374	0.00975136	TGFB1, CCL2, F2	105	24	16650	19.8214	1	0.0285911	0.0188691
GOTERM_BP_FAT	GO:0000305~response to oxygen radical	3	2.80374	0.00975136	SOD2, TNF, SOD1	105	24	16650	19.8214	1	0.0285911	0.0188691
GOTERM_BP_FAT	GO:0044253~positive regulation of multicellular organismal metabolic process	3	2.80374	0.00975136	TGFB1, CCL2, F2	105	24	16650	19.8214	1	0.0285911	0.0188691
GOTERM_BP_FAT	GO:0035456~response to interferon-beta	3	2.80374	0.00975136	IFITM3, IFNB1, TLR3	105	24	16650	19.8214	1	0.0285911	0.0188691
GOTERM_BP_FAT	GO:0033032~regulation of myeloid cell apoptotic process	3	2.80374	0.00975136	CCL5, BCL2, MIF	105	24	16650	19.8214	1	0.0285911	0.0188691
GOTERM_BP_FAT	GO:0052472~modulation by host of symbiont transcription	3	2.80374	0.00975136	JUN, CCL5, CCL4	105	24	16650	19.8214	1	0.0285911	0.0188691
GOTERM_BP_FAT	GO:0032800~receptor biosynthetic process	3	2.80374	0.00975136	IL10, HIF1A, TNF	105	24	16650	19.8214	1	0.0285911	0.0188691
GOTERM_BP_FAT	GO:0045648~positive regulation of erythrocyte differentiation	3	2.80374	0.00975136	ISG15, MAPK14, HIF1A	105	24	16650	19.8214	1	0.0285911	0.0188691
GOTERM_BP_FAT	GO:0043921~modulation by host of viral transcription	3	2.80374	0.00975136	JUN, CCL5, CCL4	105	24	16650	19.8214	1	0.0285911	0.0188691
GOTERM_BP_FAT	GO:0031954~positive regulation of protein autophosphorylation	3	2.80374	0.00975136	SRC, INS, VEGFA	105	24	16650	19.8214	1	0.0285911	0.0188691
GOTERM_BP_FAT	GO:0045940~positive regulation of steroid metabolic process	3	2.80374	0.00975136	IFNG, IL1B, TNF	105	24	16650	19.8214	1	0.0285911	0.0188691
GOTERM_BP_FAT	GO:0031056~regulation of histone modification	5	4.6729	0.00992538	XBP1, TGFB1, IL1B, TP53, VEGFA	105	134	16650	5.91684	1	0.0290838	0.0191942
GOTERM_BP_FAT	GO:0001570~vasculogenesis	4	3.73832	0.0099511	SGPL1, TGFB1, PTK2, VEGFA	105	71	16650	8.9336	1	0.0291067	0.0192093
GOTERM_BP_FAT	GO:0035304~regulation of protein dephosphorylation	4	3.73832	0.0099511	PTPA, TGFB1, PRKCD, TNF	105	71	16650	8.9336	1	0.0291067	0.0192093
GOTERM_BP_FAT	GO:0002275~myeloid cell activation involved in immune response	4	3.73832	0.0099511	F2RL1, HMGB1, TLR3, PIK3CG	105	71	16650	8.9336	1	0.0291067	0.0192093
GOTERM_BP_FAT	GO:0007612~learning	5	4.6729	0.0101804	APP, JUN, FYN, PTGS2, HIF1A	105	135	16650	5.87302	1	0.0297594	0.0196401
GOTERM_BP_FAT	GO:1901888~regulation of cell junction assembly	4	3.73832	0.0103374	SRC, TNF, PTK2, VEGFA	105	72	16650	8.80952	1	0.0301822	0.0199191
GOTERM_BP_FAT	GO:0055072~iron ion homeostasis	4	3.73832	0.0103374	SOD2, HIF1A, B2M, SOD1	105	72	16650	8.80952	1	0.0301822	0.0199191
GOTERM_BP_FAT	GO:0071774~response to fibroblast growth factor	5	4.6729	0.0104396	CXCL8, CCL5, CCL2, PTPN11, FGF2	105	136	16650	5.82983	1	0.0304623	0.020104
GOTERM_BP_FAT	GO:2000404~regulation of T cell migration	3	2.80374	0.0105565	CXCL10, RIPK3, CCL5	105	25	16650	19.0286	1	0.0306748	0.0202442
GOTERM_BP_FAT	GO:1900078~positive regulation of cellular response to insulin stimulus	3	2.80374	0.0105565	SRC, PTPN11, INS	105	25	16650	19.0286	1	0.0306748	0.0202442
GOTERM_BP_FAT	GO:1900048~positive regulation of hemostasis	3	2.80374	0.0105565	F2, TLR4, NFE2L2	105	25	16650	19.0286	1	0.0306748	0.0202442
GOTERM_BP_FAT	GO:0052312~modulation of transcription in other organism involved in symbiotic interaction	3	2.80374	0.0105565	JUN, CCL5, CCL4	105	25	16650	19.0286	1	0.0306748	0.0202442
GOTERM_BP_FAT	GO:0035767~endothelial cell chemotaxis	3	2.80374	0.0105565	HMGB1, FGF2, VEGFA	105	25	16650	19.0286	1	0.0306748	0.0202442
GOTERM_BP_FAT	GO:0002227~innate immune response in mucosa	3	2.80374	0.0105565	NOS2, DEFA1, CAMP	105	25	16650	19.0286	1	0.0306748	0.0202442
GOTERM_BP_FAT	GO:0030194~positive regulation of blood coagulation	3	2.80374	0.0105565	F2, TLR4, NFE2L2	105	25	16650	19.0286	1	0.0306748	0.0202442
GOTERM_BP_FAT	GO:0051100~negative regulation of binding	5	4.6729	0.010703	IL10, JUN, PRKCD, BAX, B2M	105	137	16650	5.78728	1	0.0310821	0.020513
GOTERM_BP_FAT	GO:0072078~nephron tubule morphogenesis	4	3.73832	0.0107323	TGFB1, BCL2, FGF2, VEGFA	105	73	16650	8.68885	1	0.0311485	0.0205569
GOTERM_BP_FAT	GO:0045934~negative regulation of nucleobase-containing compound metabolic process	17	15.8879	0.0108319	IFITM3, XBP1, JUN, CALCA, TGFB1, SRC, HMGB1, TNF, RELA, NFKB1, VEGFA, IFNG, CCL5, CCL4, EZR, TP53, ELANE	105	1371	16650	1.96624	1	0.031419	0.0207354
GOTERM_BP_FAT	GO:0072006~nephron development	5	4.6729	0.0109707	TGFB1, IFNG, BCL2, FGF2, VEGFA	105	138	16650	5.74534	1	0.0317838	0.0209761
GOTERM_BP_FAT	GO:0035265~organ growth	5	4.6729	0.0109707	BCL2, PTPN11, MAPK14, FGF2, PTK2	105	138	16650	5.74534	1	0.0317838	0.0209761
GOTERM_BP_FAT	GO:0019233~sensory perception of pain	4	3.73832	0.0111358	IL10, CALCA, FYN, PTGS2	105	74	16650	8.57143	1	0.0322237	0.0212665
GOTERM_BP_FAT	GO:0090559~regulation of membrane permeability	4	3.73832	0.0111358	BCL2, BAX, TP53, HSPA1A	105	74	16650	8.57143	1	0.0322237	0.0212665
GOTERM_BP_FAT	GO:0038066~p38MAPK cascade	3	2.80374	0.01139	EZR, MAPK14, VEGFA	105	26	16650	18.2967	1	0.032784	0.0216362
GOTERM_BP_FAT	GO:0032148~activation of protein kinase B activity	3	2.80374	0.01139	SRC, IL18, INS	105	26	16650	18.2967	1	0.032784	0.0216362
GOTERM_BP_FAT	GO:2000403~positive regulation of lymphocyte migration	3	2.80374	0.01139	CXCL10, CCL5, CCL4	105	26	16650	18.2967	1	0.032784	0.0216362
GOTERM_BP_FAT	GO:0045730~respiratory burst	3	2.80374	0.01139	CD55, PIK3CG, INS	105	26	16650	18.2967	1	0.032784	0.0216362
GOTERM_BP_FAT	GO:0046466~membrane lipid catabolic process	3	2.80374	0.01139	SGPL1, NEU1, PRKCD	105	26	16650	18.2967	1	0.032784	0.0216362
GOTERM_BP_FAT	GO:0031063~regulation of histone deacetylation	3	2.80374	0.01139	TGFB1, TP53, VEGFA	105	26	16650	18.2967	1	0.032784	0.0216362
GOTERM_BP_FAT	GO:1900101~regulation of endoplasmic reticulum unfolded protein response	3	2.80374	0.01139	XBP1, BAX, HSPA1A	105	26	16650	18.2967	1	0.032784	0.0216362
GOTERM_BP_FAT	GO:0050820~positive regulation of coagulation	3	2.80374	0.01139	F2, TLR4, NFE2L2	105	26	16650	18.2967	1	0.032784	0.0216362
GOTERM_BP_FAT	GO:0043372~positive regulation of CD4-positive, alpha-beta T cell differentiation	3	2.80374	0.01139	IL6, IFNG, IL18	105	26	16650	18.2967	1	0.032784	0.0216362
GOTERM_BP_FAT	GO:0061061~muscle structure development	10	9.34579	0.0114128	CXCL10, IL6, XBP1, TGFB1, BCL2, IL18, MAPK14, TNF, FGF2, VEGFA	105	589	16650	2.69221	1	0.0328303	0.0216668
GOTERM_BP_FAT	GO:1903729~regulation of plasma membrane organization	4	3.73832	0.011548	TGFB1, IFNG, PRKCD, EZR	105	75	16650	8.45714	1	0.0331997	0.0219106
GOTERM_BP_FAT	GO:0007010~cytoskeleton organization	15	14.0187	0.0116221	TGFB1, SRC, PRKCD, ACTN4, TNF, RHOA, PTK2, AQP1, ICAM1, SOD1, BCL2, F2RL1, CCL2, GHRL, EZR	105	1144	16650	2.07917	1	0.0333931	0.0220382
GOTERM_BP_FAT	GO:0034109~homotypic cell-cell adhesion	4	3.73832	0.011969	CCL5, PRKCD, PIK3CB, PIK3CG	105	76	16650	8.34586	1	0.0343288	0.0226558
GOTERM_BP_FAT	GO:0072088~nephron epithelium morphogenesis	4	3.73832	0.011969	TGFB1, BCL2, FGF2, VEGFA	105	76	16650	8.34586	1	0.0343288	0.0226558
GOTERM_BP_FAT	GO:0031100~organ regeneration	4	3.73832	0.011969	IL10, TGFB1, CCL2, EGFR	105	76	16650	8.34586	1	0.0343288	0.0226558
GOTERM_BP_FAT	GO:0045930~negative regulation of mitotic cell cycle	6	5.60748	0.0120889	IL10, TGFB1, BCL2, BAX, TP53, EGFR	105	219	16650	4.34442	1	0.0346524	0.0228693
GOTERM_BP_FAT	GO:0002828~regulation of type 2 immune response	3	2.80374	0.0122515	IL6, IFNB1, IL18	105	27	16650	17.619	1	0.034995	0.0230954
GOTERM_BP_FAT	GO:0030262~apoptotic nuclear changes	3	2.80374	0.0122515	CASP3, BAX, HMGB1	105	27	16650	17.619	1	0.034995	0.0230954
GOTERM_BP_FAT	GO:1902692~regulation of neuroblast proliferation	3	2.80374	0.0122515	TGFB1, HIF1A, VEGFA	105	27	16650	17.619	1	0.034995	0.0230954
GOTERM_BP_FAT	GO:0045671~negative regulation of osteoclast differentiation	3	2.80374	0.0122515	CALCA, TLR4, TLR3	105	27	16650	17.619	1	0.034995	0.0230954
GOTERM_BP_FAT	GO:0042501~serine phosphorylation of STAT protein	3	2.80374	0.0122515	IFNG, IFNA1, IFNB1	105	27	16650	17.619	1	0.034995	0.0230954
GOTERM_BP_FAT	GO:0002446~neutrophil mediated immunity	3	2.80374	0.0122515	IL6, F2RL1, ELANE	105	27	16650	17.619	1	0.034995	0.0230954
GOTERM_BP_FAT	GO:0061333~renal tubule morphogenesis	4	3.73832	0.0123986	TGFB1, BCL2, FGF2, VEGFA	105	77	16650	8.23748	1	0.0353531	0.0233318
GOTERM_BP_FAT	GO:0030101~natural killer cell activation	4	3.73832	0.0123986	IFNA1, IFNB1, IL18, IL2	105	77	16650	8.23748	1	0.0353531	0.0233318
GOTERM_BP_FAT	GO:2000177~regulation of neural precursor cell proliferation	4	3.73832	0.0123986	TGFB1, HIF1A, FGF2, VEGFA	105	77	16650	8.23748	1	0.0353531	0.0233318
GOTERM_BP_FAT	GO:0002840~regulation of T cell mediated immune response to tumor cell	2	1.86916	0.0124538	HMGB1, HSPD1	105	2	16650	158.571	1	0.0354898	0.023422
GOTERM_BP_FAT	GO:0072028~nephron morphogenesis	4	3.73832	0.0128371	TGFB1, BCL2, FGF2, VEGFA	105	78	16650	8.13187	1	0.0365605	0.0241286
GOTERM_BP_FAT	GO:0048592~eye morphogenesis	5	4.6729	0.0129662	BCL2, BAX, AQP5, HIF1A, VEGFA	105	145	16650	5.46798	1	0.0369067	0.024357
GOTERM_BP_FAT	GO:0032990~cell part morphogenesis	12	11.215	0.0130182	APP, SRC, BCL2, FN1, BAX, PTPN11, FYN, EZR, PTK2, RHOA, EGFR, VEGFA	105	817	16650	2.32908	1	0.037033	0.0244404
GOTERM_BP_FAT	GO:0042745~circadian sleep/wake cycle	3	2.80374	0.0131407	IL6, CSF2, GHRL	105	28	16650	16.9898	1	0.0372727	0.0245986
GOTERM_BP_FAT	GO:2000352~negative regulation of endothelial cell apoptotic process	3	2.80374	0.0131407	IL10, ICAM1, NFE2L2	105	28	16650	16.9898	1	0.0372727	0.0245986
GOTERM_BP_FAT	GO:0035666~TRIF-dependent toll-like receptor signaling pathway	3	2.80374	0.0131407	IRF3, TLR4, TLR3	105	28	16650	16.9898	1	0.0372727	0.0245986
GOTERM_BP_FAT	GO:0090200~positive regulation of release of cytochrome c from mitochondria	3	2.80374	0.0131407	BAX, TP53, MMP9	105	28	16650	16.9898	1	0.0372727	0.0245986
GOTERM_BP_FAT	GO:0010922~positive regulation of phosphatase activity	3	2.80374	0.0131407	PTPA, IFNG, RIPK3	105	28	16650	16.9898	1	0.0372727	0.0245986
GOTERM_BP_FAT	GO:0006694~steroid biosynthetic process	5	4.6729	0.0132689	IFNG, IL1B, TNF, NFKB1, SOD1	105	146	16650	5.43053	1	0.037549	0.024781
GOTERM_BP_FAT	GO:0022404~molting cycle process	4	3.73832	0.0132843	BCL2, TNF, RELA, EGFR	105	79	16650	8.02893	1	0.037549	0.024781
GOTERM_BP_FAT	GO:0001942~hair follicle development	4	3.73832	0.0132843	BCL2, TNF, RELA, EGFR	105	79	16650	8.02893	1	0.037549	0.024781
GOTERM_BP_FAT	GO:0008625~extrinsic apoptotic signaling pathway via death domain receptors	4	3.73832	0.0132843	BCL2, BAX, TNF, ICAM1	105	79	16650	8.02893	1	0.037549	0.024781
GOTERM_BP_FAT	GO:0002444~myeloid leukocyte mediated immunity	4	3.73832	0.0132843	IL6, F2RL1, ELANE, PIK3CG	105	79	16650	8.02893	1	0.037549	0.024781
GOTERM_BP_FAT	GO:0022405~hair cycle process	4	3.73832	0.0132843	BCL2, TNF, RELA, EGFR	105	79	16650	8.02893	1	0.037549	0.024781
GOTERM_BP_FAT	GO:0050877~neurological system process	16	14.9533	0.0138184	IL10, APP, JUN, CALCA, PTGS2, SOD2, HIF1A, EGFR, ICAM1, SOD1, IL6, IFNG, CASP3, FYN, ITGA5, CRYAA	105	1288	16650	1.96983	1	0.0390359	0.0257623
GOTERM_BP_FAT	GO:0030431~sleep	3	2.80374	0.0140571	IL6, IL18, GHRL	105	29	16650	16.4039	1	0.0395726	0.0261165
GOTERM_BP_FAT	GO:0043030~regulation of macrophage activation	3	2.80374	0.0140571	IL10, MIF, HSPD1	105	29	16650	16.4039	1	0.0395726	0.0261165
GOTERM_BP_FAT	GO:0010761~fibroblast migration	3	2.80374	0.0140571	SGPL1, TGFB1, FGF2	105	29	16650	16.4039	1	0.0395726	0.0261165
GOTERM_BP_FAT	GO:0038179~neurotrophin signaling pathway	3	2.80374	0.0140571	SRC, CASP3, PTPN11	105	29	16650	16.4039	1	0.0395726	0.0261165
GOTERM_BP_FAT	GO:0046627~negative regulation of insulin receptor signaling pathway	3	2.80374	0.0140571	IL1B, PRKCD, RELA	105	29	16650	16.4039	1	0.0395726	0.0261165
GOTERM_BP_FAT	GO:0097421~liver regeneration	3	2.80374	0.0140571	IL10, TGFB1, EGFR	105	29	16650	16.4039	1	0.0395726	0.0261165
GOTERM_BP_FAT	GO:0031647~regulation of protein stability	6	5.60748	0.0141803	XBP1, SRC, PRKCD, BCL2, HSPD1, HSPA1A	105	228	16650	4.17293	1	0.0398963	0.0263301
GOTERM_BP_FAT	GO:2001252~positive regulation of chromosome organization	5	4.6729	0.014204	XBP1, TGFB1, IL1B, TP53, VEGFA	105	149	16650	5.32119	1	0.0398976	0.0263309
GOTERM_BP_FAT	GO:0031623~receptor internalization	4	3.73832	0.0142053	CALCA, CXCL8, EZR, VEGFA	105	81	16650	7.83069	1	0.0398976	0.0263309
GOTERM_BP_FAT	GO:0098773~skin epidermis development	4	3.73832	0.0142053	BCL2, TNF, RELA, EGFR	105	81	16650	7.83069	1	0.0398976	0.0263309
GOTERM_BP_FAT	GO:0010821~regulation of mitochondrion organization	6	5.60748	0.0144267	BCL2, BAX, HIF1A, TP53, MMP9, HSPA1A	105	229	16650	4.15471	1	0.0404962	0.026726
GOTERM_BP_FAT	GO:0048259~regulation of receptor-mediated endocytosis	4	3.73832	0.014679	SRC, PIK3CB, B2M, VEGFA	105	82	16650	7.73519	1	0.0411571	0.0271621
GOTERM_BP_FAT	GO:0010508~positive regulation of autophagy	4	3.73832	0.014679	XBP1, IFNG, PIK3CB, HIF1A	105	82	16650	7.73519	1	0.0411571	0.0271621
GOTERM_BP_FAT	GO:0042044~fluid transport	3	2.80374	0.0150004	CSF2, AQP5, AQP1	105	30	16650	15.8571	1	0.0419376	0.0276772
GOTERM_BP_FAT	GO:0010543~regulation of platelet activation	3	2.80374	0.0150004	PRKCD, F2, TLR4	105	30	16650	15.8571	1	0.0419376	0.0276772
GOTERM_BP_FAT	GO:0033280~response to vitamin D	3	2.80374	0.0150004	CXCL10, TGFB1, PTGS2	105	30	16650	15.8571	1	0.0419376	0.0276772
GOTERM_BP_FAT	GO:0034122~negative regulation of toll-like receptor signaling pathway	3	2.80374	0.0150004	F2RL1, TLR4, TLR3	105	30	16650	15.8571	1	0.0419376	0.0276772
GOTERM_BP_FAT	GO:0030224~monocyte differentiation	3	2.80374	0.0150004	JUN, CSF2, VEGFA	105	30	16650	15.8571	1	0.0419376	0.0276772
GOTERM_BP_FAT	GO:0001655~urogenital system development	7	6.54206	0.0151609	SGPL1, TGFB1, IFNG, BCL2, BAX, FGF2, VEGFA	105	320	16650	3.46875	1	0.0422956	0.0279135
GOTERM_BP_FAT	GO:0032091~negative regulation of protein binding	4	3.73832	0.0151617	IL10, PRKCD, BAX, B2M	105	83	16650	7.642	1	0.0422956	0.0279135
GOTERM_BP_FAT	GO:0046620~regulation of organ growth	4	3.73832	0.0151617	MAPK14, FGF2, PTK2, SOD1	105	83	16650	7.642	1	0.0422956	0.0279135
GOTERM_BP_FAT	GO:0098660~inorganic ion transmembrane transport	11	10.2804	0.0151632	CXCL10, CXCL11, TGFB1, CXCR3, BAX, ACTN4, PLCG1, CCR5, F2, FGF2, AQP1	105	725	16650	2.40591	1	0.0422956	0.0279135
GOTERM_BP_FAT	GO:0050886~endocrine process	4	3.73832	0.0156533	IL1B, F2RL1, PTPN11, GHRL	105	84	16650	7.55102	1	0.0436375	0.0287991
GOTERM_BP_FAT	GO:0007050~cell cycle arrest	6	5.60748	0.0159662	TGFB1, CXCL8, IFNG, BAX, MIF, TP53	105	235	16650	4.04863	1	0.0444705	0.0293489
GOTERM_BP_FAT	GO:1900077~negative regulation of cellular response to insulin stimulus	3	2.80374	0.0159703	IL1B, PRKCD, RELA	105	31	16650	15.3456	1	0.0444705	0.0293489
GOTERM_BP_FAT	GO:0006672~ceramide metabolic process	4	3.73832	0.0161537	SGPL1, NEU1, PRKCD, TNF	105	85	16650	7.46218	1	0.0449299	0.029652
GOTERM_BP_FAT	GO:0043255~regulation of carbohydrate biosynthetic process	4	3.73832	0.0161537	IL6, TGFB1, NFKB1, INS	105	85	16650	7.46218	1	0.0449299	0.029652
GOTERM_BP_FAT	GO:0071241~cellular response to inorganic substance	5	4.6729	0.0161973	JUN, AIFM1, B2M, AQP1, SOD1	105	155	16650	5.11521	1	0.0450253	0.029715
GOTERM_BP_FAT	GO:0045907~positive regulation of vasoconstriction	3	2.80374	0.0169664	PTGS2, EGFR, ICAM1	105	32	16650	14.8661	1	0.0470292	0.0310375
GOTERM_BP_FAT	GO:0001844~protein insertion into mitochondrial membrane involved in apoptotic signaling pathway	3	2.80374	0.0169664	BCL2, BAX, TP53	105	32	16650	14.8661	1	0.0470292	0.0310375
GOTERM_BP_FAT	GO:0002756~MyD88-independent toll-like receptor signaling pathway	3	2.80374	0.0169664	IRF3, TLR4, TLR3	105	32	16650	14.8661	1	0.0470292	0.0310375
GOTERM_BP_FAT	GO:0043114~regulation of vascular permeability	3	2.80374	0.0169664	TGFB1, SRC, VEGFA	105	32	16650	14.8661	1	0.0470292	0.0310375
GOTERM_BP_FAT	GO:0048873~homeostasis of number of cells within a tissue	3	2.80374	0.0169664	BCL2, BAX, PTPN11	105	32	16650	14.8661	1	0.0470292	0.0310375
GOTERM_BP_FAT	GO:0030816~positive regulation of cAMP metabolic process	4	3.73832	0.0171815	CXCL10, CXCL11, CALCA, CXCR3	105	87	16650	7.29064	1	0.0475983	0.0314131
GOTERM_BP_FAT	GO:0001701~in utero embryonic development	7	6.54206	0.0176152	IL10, CSF2, PLCG1, HIF1A, EGFR, KLF2, VEGFA	105	331	16650	3.35347	1	0.0487722	0.0321879
GOTERM_BP_FAT	GO:0043467~regulation of generation of precursor metabolites and energy	4	3.73832	0.0177088	NOS2, HMGB1, HIF1A, INS	105	88	16650	7.20779	1	0.0490034	0.0323404
GOTERM_BP_FAT	GO:1902275~regulation of chromatin organization	5	4.6729	0.0179863	XBP1, TGFB1, IL1B, TP53, VEGFA	105	160	16650	4.95536	1	0.049664	0.0327764
GOTERM_BP_FAT	GO:0002931~response to ischemia	3	2.80374	0.0179883	AIFM1, BCL2, HSPD1	105	33	16650	14.4156	1	0.049664	0.0327764
[truncated: 486 more rows]
