# Supplementary material for: Influenza A virus infects pulmonary microvascular endothelial cells leading to microvascular leakage and release of pro-inflammatory cytokines
Source: PeerJ. 2021 Aug 3;9:e11892. doi: 10.7717/peerj.11892 (PMC8344683; doi:10.7717/peerj.11892)
Supplement: Supplemental Information 6 [file peerj-09-11892-s006.xls]

## Sheet: Sheet1
Category	Term	Count	%	PValue	Genes	List Total	Pop Hits	Pop Total	Fold Enrichment	Bonferroni	Benjamini	FDR
GOTERM_MF_FAT	GO:0005102~receptor binding	56	52.3364	2.8111e-30	APP, CSF2, CXCL8, IFNA1, HMGB1, FGF2, TNF, PIK3CG, ICAM1, CASP3, MBL2, IL10, SFTPB, IL18, MIF, ACTN4, F2, IL1A, IFNG, IL1B, ITGA5, TLR5, TP53, TLR2, CRP, CALCA, SRC, HIF1A, EGFR, KNG1, INS, PTPA, TTR, CCL5, CCL4, CCL2, FYN, PLCG1, XBP1, TGFB1, NOS2, IFNB1, FN1, PTPN11, IL2, PTK2, VEGFA, CXCL10, IL3, CXCL11, IL6, IL5, IL9, F2RL1, GHRL, HSPA1A	102	1462	15478	5.8124	1.52643e-27	1.52643e-27	1.34371e-27
GOTERM_MF_FAT	GO:0005125~cytokine activity	25	23.3645	6.22897e-23	CSF2, CXCL8, IFNA1, HMGB1, FGF2, TNF, CCL5, CCL4, CCL2, IL10, TGFB1, IFNB1, IL18, MIF, IL2, VEGFA, IL1A, IL3, CXCL10, CXCL11, IL6, IL5, IFNG, IL1B, IL9	102	222	15478	17.0884	3.38233e-20	1.69117e-20	1.48872e-20
GOTERM_MF_FAT	GO:0005126~cytokine receptor binding	26	24.2991	4.47049e-22	CSF2, CXCL8, IFNA1, TNF, CASP3, CCL5, CCL4, CCL2, PLCG1, IL10, TGFB1, IFNB1, MIF, IL2, VEGFA, IL1A, IL3, CXCL10, CXCL11, IL6, IL5, IFNG, IL1B, IL9, ITGA5, TLR5	102	273	15478	14.4519	2.42748e-19	8.09159e-20	7.12298e-20
GOTERM_MF_FAT	GO:0070851~growth factor receptor binding	16	14.9533	4.0345e-15	IL10, APP, CSF2, SRC, FGF2, IL2, VEGFA, IL1A, IL3, IL6, IL5, IL1B, IL9, FYN, ITGA5, TLR5	102	128	15478	18.9681	2.17026e-12	5.47683e-13	4.82122e-13
GOTERM_MF_FAT	GO:0042802~identical protein binding	34	31.7757	1.11124e-11	APP, CALCA, PTGS2, TNF, AGER, RELA, EGFR, INS, PTPA, TTR, CCL5, CCL4, FYN, GLUL, B2M, XBP1, JUN, TGFB1, RIPK3, NOS2, FN1, ACTN4, SOD2, MMP9, NFKB1, SOD1, VEGFA, IRF3, ALB, BCL2, BAX, CRYAA, TP53, TLR3	102	1358	15478	3.79921	6.034e-09	1.2068e-09	1.06234e-09
GOTERM_MF_FAT	GO:0008083~growth factor activity	11	10.2804	1.01263e-07	IL10, IL3, IL6, TGFB1, CSF2, IL5, IL9, F2, FGF2, IL2, VEGFA	102	162	15478	10.3037	5.49843e-05	8.48638e-06	7.47051e-06
GOTERM_MF_FAT	GO:0001664~G-protein coupled receptor binding	13	12.1495	1.09401e-07	SFTPB, CALCA, CXCL8, PTPN11, IL2, CXCL10, CXCL11, CCL5, CCL4, CCL2, FYN, GHRL, HSPA1A	102	257	15478	7.67582	5.94029e-05	8.48638e-06	7.47051e-06
GOTERM_MF_FAT	GO:0008201~heparin binding	10	9.34579	9.97602e-07	CXCL10, APP, CXCL11, FN1, CCL2, AGER, FGF2, KNG1, ELANE, VEGFA	102	160	15478	9.48407	0.000541552	6.19165e-05	5.45048e-05
GOTERM_MF_FAT	GO:0005539~glycosaminoglycan binding	11	10.2804	1.02624e-06	CXCL10, APP, CXCL11, FN1, CCL2, AGER, FGF2, KNG1, ELANE, TLR2, VEGFA	102	208	15478	8.02498	0.000557094	6.19165e-05	5.45048e-05
GOTERM_MF_FAT	GO:0097367~carbohydrate derivative binding	34	31.7757	2.90777e-06	APP, ABCB1, SRC, HMGB1, PIK3CB, FGF2, AGER, EGFR, PIK3CG, KNG1, HSPD1, PTPA, CCL2, FYN, GLUL, B2M, ELANE, TGFB1, RIPK3, NOS2, PRKCD, FN1, ACTN4, MAPK14, RHOA, IL2, PTK2, VEGFA, CXCL10, CXCL11, TP53, TLR4, HSPA1A, TLR2	102	2241	15478	2.30225	0.00157768	0.000157892	0.000138992
GOTERM_MF_FAT	GO:0001618~virus receptor activity	7	6.54206	6.21735e-06	CD209, MRC1, ITGA5, CCR5, CD55, ICAM1, HSPA1A	102	70	15478	15.1745	0.00337034	0.000306911	0.000270172
GOTERM_MF_FAT	GO:0098772~molecular function regulator	25	23.3645	8.04592e-06	APP, CSF2, HMGB1, FGF2, EGFR, KNG1, PTPA, CASP3, CCL5, FYN, CD55, SFTPB, JUN, TGFB1, PRKCD, FN1, IL2, PTK2, VEGFA, IL3, CXCL10, IL5, IL2RA, BCL2, GHRL	102	1397	15478	2.71555	0.00435942	0.000364078	0.000320496
GOTERM_MF_FAT	GO:0046982~protein heterodimerization activity	14	13.0841	1.00933e-05	XBP1, JUN, TGFB1, HIF1A, EGFR, RELA, NFKB1, VEGFA, PTPA, TTR, BCL2, BAX, TP53, TLR2	102	465	15478	4.56867	0.00546572	0.000421591	0.000371125
GOTERM_MF_FAT	GO:0002020~protease binding	8	7.47664	1.12654e-05	XBP1, CASP3, BCL2, FN1, TNF, TP53, ELANE, INS	102	117	15478	10.3757	0.00609849	0.000436938	0.000384634
GOTERM_MF_FAT	GO:0008009~chemokine activity	6	5.60748	1.62605e-05	CXCL10, CXCL11, CXCL8, CCL5, CCL4, CCL2	102	49	15478	18.581	0.00879067	0.000588631	0.000518169
GOTERM_MF_FAT	GO:0019899~enzyme binding	28	26.1682	2.0691e-05	APP, SRC, HMGB1, PTGS2, HIF1A, TNF, RELA, EGFR, HSPD1, INS, PTPA, CASP3, FYN, PLCG1, ELANE, XBP1, JUN, TGFB1, PRKCD, FN1, PTPN11, MAPK14, PTK2, SOD1, BCL2, EZR, TP53, HSPA1A	102	1789	15478	2.37499	0.0111724	0.000682145	0.000600489
GOTERM_MF_FAT	GO:1901681~sulfur compound binding	10	9.34579	2.13563e-05	CXCL10, APP, CXCL11, FN1, CCL2, AGER, FGF2, KNG1, ELANE, VEGFA	102	233	15478	6.51267	0.0115296	0.000682145	0.000600489
GOTERM_MF_FAT	GO:0004713~protein tyrosine kinase activity	9	8.41121	2.30415e-05	IL3, CSF2, IL5, SRC, PRKCD, FYN, FGF2, PTK2, EGFR	102	180	15478	7.58725	0.0124337	0.000695084	0.000611879
GOTERM_MF_FAT	GO:0042056~chemoattractant activity	5	4.6729	3.10034e-05	CCL5, HMGB1, MIF, FGF2, VEGFA	102	28	15478	27.0973	0.0166942	0.000886045	0.00077998
GOTERM_MF_FAT	GO:0032403~protein complex binding	17	15.8879	3.43406e-05	CALCA, IFNA1, RIPK3, IFNB1, SRC, FN1, PTPN11, ACTN4, MMP9, EGFR, RELA, INS, ICAM1, CASP3, FYN, ITGA5, EZR	102	766	15478	3.36771	0.0184745	0.000932346	0.00082074
GOTERM_MF_FAT	GO:0046983~protein dimerization activity	21	19.6262	5.0968e-05	XBP1, JUN, TGFB1, NOS2, ACTN4, PTGS2, HIF1A, EGFR, RELA, NFKB1, SOD1, VEGFA, PTPA, TTR, AIFM1, IRF3, CCL5, BCL2, BAX, TP53, TLR2	102	1160	15478	2.74711	0.0272969	0.00127361	0.00112115
GOTERM_MF_FAT	GO:0046934~phosphatidylinositol-4,5-bisphosphate 3-kinase activity	6	5.60748	5.16011e-05	PTPN11, FYN, PIK3CB, FGF2, EGFR, PIK3CG	102	62	15478	14.685	0.0276312	0.00127361	0.00112115
GOTERM_MF_FAT	GO:0042379~chemokine receptor binding	6	5.60748	5.57613e-05	CXCL10, CXCL11, CXCL8, CCL5, CCL4, CCL2	102	63	15478	14.4519	0.0298254	0.00131645	0.00115887
GOTERM_MF_FAT	GO:0052813~phosphatidylinositol bisphosphate kinase activity	6	5.60748	6.48555e-05	PTPN11, FYN, PIK3CB, FGF2, EGFR, PIK3CG	102	65	15478	14.0072	0.0346047	0.00146736	0.00129171
GOTERM_MF_FAT	GO:0044877~macromolecular complex binding	22	20.5607	8.78431e-05	CRP, XBP1, JUN, CALCA, IFNA1, RIPK3, IFNB1, SRC, FN1, PTPN11, ACTN4, MMP9, EGFR, RELA, NFKB1, INS, ICAM1, CASP3, FYN, ITGA5, EZR, TP53	102	1306	15478	2.5562	0.0465811	0.00190795	0.00167956
GOTERM_MF_FAT	GO:0035004~phosphatidylinositol 3-kinase activity	6	5.60748	9.26145e-05	PTPN11, FYN, PIK3CB, FGF2, EGFR, PIK3CG	102	70	15478	13.0067	0.0490483	0.00193422	0.00170268
GOTERM_MF_FAT	GO:0005088~Ras guanyl-nucleotide exchange factor activity	9	8.41121	0.000122199	IL3, CSF2, IL5, IL2RA, FYN, FGF2, PTK2, EGFR, IL2	102	228	15478	5.98994	0.0642041	0.00245755	0.00216337
GOTERM_MF_FAT	GO:0016773~phosphotransferase activity, alcohol group as acceptor	16	14.9533	0.00016462	CSF2, RIPK3, SRC, PRKCD, PTPN11, PIK3CB, MAPK14, FGF2, EGFR, PIK3CG, PTK2, IL3, IL5, CCL5, CCL2, FYN	102	784	15478	3.09684	0.0855167	0.00319245	0.0028103
GOTERM_MF_FAT	GO:0042803~protein homodimerization activity	15	14.0187	0.00027068	XBP1, JUN, TGFB1, NOS2, ACTN4, PTGS2, RELA, NFKB1, SOD1, VEGFA, PTPA, IRF3, CCL5, BCL2, BAX	102	730	15478	3.11805	0.136705	0.00506826	0.00446156
GOTERM_MF_FAT	GO:0016301~kinase activity	17	15.8879	0.000304496	CSF2, RIPK3, SRC, PRKCD, PTPN11, PIK3CB, MAPK14, FGF2, EGFR, PIK3CG, PTK2, IL3, IL5, PLAU, CCL5, CCL2, FYN	102	924	15478	2.79185	0.152417	0.00550247	0.0048438
GOTERM_MF_FAT	GO:0004672~protein kinase activity	14	13.0841	0.000314137	CSF2, RIPK3, SRC, PRKCD, MAPK14, FGF2, EGFR, PIK3CG, PTK2, IL3, IL5, CCL5, CCL2, FYN	102	652	15478	3.25833	0.156844	0.00550247	0.0048438
GOTERM_MF_FAT	GO:0008047~enzyme activator activity	12	11.215	0.000373209	PTPA, SFTPB, APP, JUN, TGFB1, CCL5, CASP3, PRKCD, FN1, GHRL, HMGB1, IL2	102	494	15478	3.68612	0.183469	0.00622652	0.00548117
GOTERM_MF_FAT	GO:0001530~lipopolysaccharide binding	4	3.73832	0.000379513	HMGB1, TLR4, HSPD1, TLR2	102	22	15478	27.59	0.18626	0.00622652	0.00548117
GOTERM_MF_FAT	GO:0019955~cytokine binding	6	5.60748	0.000389874	IFNGR1, CXCR3, IL2RA, HMGB1, CCR5, ELANE	102	95	15478	9.5839	0.190827	0.00622652	0.00548117
GOTERM_MF_FAT	GO:0005178~integrin binding	6	5.60748	0.000644472	SRC, FN1, ACTN4, ITGA5, EGFR, ICAM1	102	106	15478	8.58935	0.295355	0.00999853	0.00880165
GOTERM_MF_FAT	GO:0019903~protein phosphatase binding	6	5.60748	0.000794423	PTPA, BCL2, MAPK14, TP53, EGFR, SOD1	102	111	15478	8.20244	0.350494	0.0119825	0.0105482
GOTERM_MF_FAT	GO:0005085~guanyl-nucleotide exchange factor activity	9	8.41121	0.000913915	IL3, CSF2, IL5, IL2RA, FYN, FGF2, PTK2, EGFR, IL2	102	308	15478	4.43411	0.391332	0.0134123	0.0118068
GOTERM_MF_FAT	GO:0019209~kinase activator activity	5	4.6729	0.00112582	TGFB1, CCL5, GHRL, HMGB1, IL2	102	70	15478	10.8389	0.457552	0.0160873	0.0141616
GOTERM_MF_FAT	GO:0008134~transcription factor binding	11	10.2804	0.00186635	XBP1, JUN, BCL2, ACTN4, HMGB1, MAPK14, HIF1A, TP53, RELA, NFKB1, NFE2L2	102	512	15478	3.26015	0.637371	0.0259853	0.0228747
GOTERM_MF_FAT	GO:0051087~chaperone binding	5	4.6729	0.0019342	ALB, BAX, TP53, HSPD1, SOD1	102	81	15478	9.36698	0.650512	0.0260031	0.0228904
GOTERM_MF_FAT	GO:0030234~enzyme regulator activity	16	14.9533	0.0019634	SFTPB, APP, JUN, TGFB1, PRKCD, FN1, HMGB1, EGFR, IL2, KNG1, PTPA, CXCL10, CASP3, CCL5, GHRL, CD55	102	996	15478	2.43767	0.656021	0.0260031	0.0228904
GOTERM_MF_FAT	GO:0001158~enhancer sequence-specific DNA binding	5	4.6729	0.00211525	XBP1, JUN, RELA, NFKB1, NFE2L2	102	83	15478	9.14127	0.683298	0.0273471	0.0240735
GOTERM_MF_FAT	GO:0019904~protein domain specific binding	12	11.215	0.00218757	APP, JUN, SRC, IL1B, BCL2, BAX, PTPN11, EZR, RELA, PTK2, HSPA1A, NFE2L2	102	614	15478	2.9657	0.69552	0.0275396	0.024243
GOTERM_MF_FAT	GO:0043560~insulin receptor substrate binding	3	2.80374	0.00223157	PRKCD, PTPN11, PIK3CB	102	11	15478	41.385	0.702725	0.0275396	0.024243
GOTERM_MF_FAT	GO:0019901~protein kinase binding	11	10.2804	0.00243412	XBP1, SRC, PRKCD, PTPN11, PLCG1, EZR, HIF1A, TP53, RELA, PTK2, EGFR	102	531	15478	3.1435	0.733755	0.0286124	0.0251873
GOTERM_MF_FAT	GO:0004872~receptor activity	22	20.5607	0.00247658	IFNGR1, SIGMAR1, F2, AGER, EGFR, AQP1, ICAM1, CLEC4A, PTPRB, CD209, IL2RA, CXCR3, MRC1, F2RL1, ITGA5, CCR5, TLR5, TLR4, CD55, TLR3, HSPA1A, TLR2	102	1680	15478	1.98714	0.739838	0.0286124	0.0251873
GOTERM_MF_FAT	GO:0060089~molecular transducer activity	22	20.5607	0.00247658	IFNGR1, SIGMAR1, F2, AGER, EGFR, AQP1, ICAM1, CLEC4A, PTPRB, CD209, IL2RA, CXCR3, MRC1, F2RL1, ITGA5, CCR5, TLR5, TLR4, CD55, TLR3, HSPA1A, TLR2	102	1680	15478	1.98714	0.739838	0.0286124	0.0251873
GOTERM_MF_FAT	GO:0031625~ubiquitin protein ligase binding	8	7.47664	0.00273166	XBP1, BCL2, HIF1A, TP53, RELA, EGFR, HSPD1, HSPA1A	102	287	15478	4.22983	0.773571	0.03052	0.0268666
GOTERM_MF_FAT	GO:0016303~1-phosphatidylinositol-3-kinase activity	4	3.73832	0.0027541	PTPN11, PIK3CB, FGF2, PIK3CG	102	43	15478	14.1158	0.776321	0.03052	0.0268666
GOTERM_MF_FAT	GO:0051427~hormone receptor binding	6	5.60748	0.00300383	XBP1, SRC, PTPN11, FYN, ACTN4, HIF1A	102	150	15478	6.0698	0.804762	0.0320097	0.0281779
GOTERM_MF_FAT	GO:0044389~ubiquitin-like protein ligase binding	8	7.47664	0.00300643	XBP1, BCL2, HIF1A, TP53, RELA, EGFR, HSPD1, HSPA1A	102	292	15478	4.1574	0.805038	0.0320097	0.0281779
GOTERM_MF_FAT	GO:0003705~transcription factor activity, RNA polymerase II distal enhancer sequence-specific binding	5	4.6729	0.00332396	JUN, HIF1A, RELA, NFKB1, NFE2L2	102	94	15478	8.07155	0.836005	0.0338169	0.0297688
GOTERM_MF_FAT	GO:0004715~non-membrane spanning protein tyrosine kinase activity	4	3.73832	0.00334017	SRC, PRKCD, FYN, PTK2	102	46	15478	13.1952	0.837447	0.0338169	0.0297688
GOTERM_MF_FAT	GO:0019902~phosphatase binding	6	5.60748	0.00336301	PTPA, BCL2, MAPK14, TP53, EGFR, SOD1	102	154	15478	5.91215	0.839456	0.0338169	0.0297688
GOTERM_MF_FAT	GO:0035326~enhancer binding	5	4.6729	0.00358527	XBP1, JUN, RELA, NFKB1, NFE2L2	102	96	15478	7.90339	0.857769	0.0353964	0.0311593
GOTERM_MF_FAT	GO:0005149~interleukin-1 receptor binding	3	2.80374	0.00418843	IL1A, IL1B, TLR5	102	15	15478	30.349	0.897623	0.0406128	0.0357512
GOTERM_MF_FAT	GO:0004871~signal transducer activity	22	20.5607	0.00439796	RIPK3, IFNGR1, SIGMAR1, F2, MAPK14, AGER, EGFR, PTK2, ICAM1, VEGFA, CLEC4A, PTPRB, IL2RA, CXCR3, MRC1, F2RL1, PLCG1, CCR5, TLR5, TLR4, TLR3, TLR2	102	1763	15478	1.89359	0.908678	0.0418964	0.0368811
GOTERM_MF_FAT	GO:0052742~phosphatidylinositol kinase activity	4	3.73832	0.00447582	PTPN11, PIK3CB, FGF2, PIK3CG	102	51	15478	11.9016	0.912475	0.0419029	0.0368869
GOTERM_MF_FAT	GO:0045236~CXCR chemokine receptor binding	3	2.80374	0.00537914	CXCL10, CXCL11, CXCL8	102	17	15478	26.7785	0.946537	0.0492239	0.0433316
GOTERM_MF_FAT	GO:0019900~kinase binding	11	10.2804	0.00543911	XBP1, SRC, PRKCD, PTPN11, PLCG1, EZR, HIF1A, TP53, RELA, PTK2, EGFR	102	595	15478	2.80537	0.948259	0.0492239	0.0433316
GOTERM_MF_FAT	GO:0005507~copper ion binding	4	3.73832	0.00611406	IL1A, ALB, TP53, SOD1	102	57	15478	10.6488	0.964211	0.0544252	0.0479102
GOTERM_MF_FAT	GO:0005537~mannose binding	3	2.80374	0.00741999	CD209, MRC1, MBL2	102	20	15478	22.7618	0.982474	0.0649848	0.0572057
GOTERM_MF_FAT	GO:0030295~protein kinase activator activity	4	3.73832	0.00806782	TGFB1, CCL5, GHRL, HMGB1	102	63	15478	9.63461	0.987705	0.0691795	0.0608984
GOTERM_MF_FAT	GO:0019956~chemokine binding	3	2.80374	0.00816638	CXCR3, HMGB1, CCR5	102	21	15478	21.6779	0.988351	0.0691795	0.0608984
GOTERM_MF_FAT	GO:0019207~kinase regulator activity	6	5.60748	0.00828116	CXCL10, TGFB1, CCL5, GHRL, HMGB1, IL2	102	191	15478	4.76686	0.989061	0.0691795	0.0608984
GOTERM_MF_FAT	GO:0000980~RNA polymerase II distal enhancer sequence-specific DNA binding	4	3.73832	0.00879149	JUN, RELA, NFKB1, NFE2L2	102	65	15478	9.33816	0.991728	0.07233	0.0636717
GOTERM_MF_FAT	GO:0050839~cell adhesion molecule binding	9	8.41121	0.0105379	SRC, FN1, PTPN11, ACTN4, ITGA5, EZR, EGFR, ICAM1, HSPA1A	102	461	15478	2.96249	0.996825	0.0854038	0.0751805
GOTERM_MF_FAT	GO:0001205~transcriptional activator activity, RNA polymerase II distal enhancer sequence-specific binding	3	2.80374	0.0114705	RELA, NFKB1, NFE2L2	102	25	15478	18.2094	0.998097	0.0915953	0.0806308
GOTERM_MF_FAT	GO:0046875~ephrin receptor binding	3	2.80374	0.012374	SRC, FYN, PIK3CG	102	26	15478	17.509	0.998842	0.0973778	0.0857212
GOTERM_MF_FAT	GO:0051721~protein phosphatase 2A binding	3	2.80374	0.0133076	PTPA, BCL2, TP53	102	27	15478	16.8606	0.999307	0.101775	0.0895919
GOTERM_MF_FAT	GO:0004435~phosphatidylinositol phospholipase C activity	3	2.80374	0.0133076	CCL5, PLCG1, CCR5	102	27	15478	16.8606	0.999307	0.101775	0.0895919
GOTERM_MF_FAT	GO:0099600~transmembrane receptor activity	17	15.8879	0.0149921	IFNGR1, SIGMAR1, AGER, EGFR, AQP1, ICAM1, CLEC4A, PTPRB, IL2RA, CXCR3, MRC1, F2RL1, CCR5, TLR5, TLR4, TLR3, TLR2	102	1363	15478	1.89264	0.999726	0.113065	0.0995307
GOTERM_MF_FAT	GO:0016209~antioxidant activity	4	3.73832	0.0159366	ALB, SOD2, PTGS2, SOD1	102	81	15478	7.49359	0.999837	0.118542	0.104352
GOTERM_MF_FAT	GO:0004629~phospholipase C activity	3	2.80374	0.0162849	CCL5, PLCG1, CCR5	102	30	15478	15.1745	0.999866	0.119496	0.105192
GOTERM_MF_FAT	GO:0005158~insulin receptor binding	3	2.80374	0.0173348	SRC, PTPN11, INS	102	31	15478	14.685	0.999925	0.125504	0.11048
GOTERM_MF_FAT	GO:0038023~signaling receptor activity	17	15.8879	0.0209152	IFNGR1, SIGMAR1, F2, AGER, EGFR, ICAM1, CLEC4A, PTPRB, IL2RA, CXCR3, MRC1, F2RL1, CCR5, TLR5, TLR4, TLR3, TLR2	102	1417	15478	1.82051	0.99999	0.148403	0.130638
GOTERM_MF_FAT	GO:0004896~cytokine receptor activity	4	3.73832	0.0210443	IFNGR1, CXCR3, IL2RA, CCR5	102	90	15478	6.74423	0.99999	0.148403	0.130638
GOTERM_MF_FAT	GO:0004888~transmembrane signaling receptor activity	16	14.9533	0.0223977	IFNGR1, SIGMAR1, AGER, EGFR, ICAM1, CLEC4A, PTPRB, IL2RA, CXCR3, MRC1, F2RL1, CCR5, TLR5, TLR4, TLR3, TLR2	102	1309	15478	1.85479	0.999995	0.155922	0.137258
GOTERM_MF_FAT	GO:0016504~peptidase activator activity	3	2.80374	0.0254469	APP, CASP3, FN1	102	38	15478	11.9799	0.999999	0.173222	0.152486
GOTERM_MF_FAT	GO:0004252~serine-type endopeptidase activity	6	5.60748	0.0257614	PLAU, MMP2, F2, MMP9, ELANE, MBL2	102	255	15478	3.57047	0.999999	0.173222	0.152486
GOTERM_MF_FAT	GO:0051434~BH3 domain binding	2	1.86916	0.0258497	BCL2, BAX	102	4	15478	75.8725	0.999999	0.173222	0.152486
GOTERM_MF_FAT	GO:0019887~protein kinase regulator activity	5	4.6729	0.0261587	CXCL10, TGFB1, CCL5, GHRL, HMGB1	102	172	15478	4.41119	0.999999	0.173222	0.152486
GOTERM_MF_FAT	GO:0047485~protein N-terminus binding	4	3.73832	0.0276532	TGFB1, ACTN4, TP53, RELA	102	100	15478	6.0698	1	0.180912	0.159256
GOTERM_MF_FAT	GO:0048020~CCR chemokine receptor binding	3	2.80374	0.0279981	CCL5, CCL4, CCL2	102	40	15478	11.3809	1	0.180988	0.159323
GOTERM_MF_FAT	GO:0001948~glycoprotein binding	4	3.73832	0.0298273	TGFB1, FYN, B2M, EGFR	102	103	15478	5.89301	1	0.190544	0.167735
GOTERM_MF_FAT	GO:0001085~RNA polymerase II transcription factor binding	4	3.73832	0.0305716	XBP1, JUN, TP53, NFE2L2	102	104	15478	5.83635	1	0.193028	0.169921
GOTERM_MF_FAT	GO:0001875~lipopolysaccharide receptor activity	2	1.86916	0.032208	TLR4, TLR2	102	5	15478	60.698	1	0.194322	0.17106
GOTERM_MF_FAT	GO:0048248~CXCR3 chemokine receptor binding	2	1.86916	0.032208	CXCL10, CXCL11	102	5	15478	60.698	1	0.194322	0.17106
GOTERM_MF_FAT	GO:0004784~superoxide dismutase activity	2	1.86916	0.032208	SOD2, SOD1	102	5	15478	60.698	1	0.194322	0.17106
GOTERM_MF_FAT	GO:0016721~oxidoreductase activity, acting on superoxide radicals as acceptor	2	1.86916	0.032208	SOD2, SOD1	102	5	15478	60.698	1	0.194322	0.17106
GOTERM_MF_FAT	GO:0003690~double-stranded DNA binding	11	10.2804	0.037122	XBP1, JUN, IRF3, ACTN4, HMGB1, TP53, RELA, EGFR, NFKB1, HSPD1, NFE2L2	102	805	15478	2.07354	1	0.220458	0.194068
GOTERM_MF_FAT	GO:0008236~serine-type peptidase activity	6	5.60748	0.0373521	PLAU, MMP2, F2, MMP9, ELANE, MBL2	102	282	15478	3.22862	1	0.220458	0.194068
GOTERM_MF_FAT	GO:0043184~vascular endothelial growth factor receptor 2 binding	2	1.86916	0.0385253	ITGA5, VEGFA	102	6	15478	50.5817	1	0.22381	0.197018
GOTERM_MF_FAT	GO:0017171~serine hydrolase activity	6	5.60748	0.0388091	PLAU, MMP2, F2, MMP9, ELANE, MBL2	102	285	15478	3.19463	1	0.22381	0.197018
GOTERM_MF_FAT	GO:0048029~monosaccharide binding	3	2.80374	0.0391564	CD209, MRC1, MBL2	102	48	15478	9.48407	1	0.22381	0.197018
GOTERM_MF_FAT	GO:0005179~hormone activity	4	3.73832	0.0447014	CALCA, TTR, GHRL, INS	102	121	15478	5.01637	1	0.245731	0.216315
GOTERM_MF_FAT	GO:0035005~1-phosphatidylinositol-4-phosphate 3-kinase activity	2	1.86916	0.0448017	PIK3CB, PIK3CG	102	7	15478	43.3557	1	0.245731	0.216315
GOTERM_MF_FAT	GO:0019958~C-X-C chemokine binding	2	1.86916	0.0448017	CXCR3, HMGB1	102	7	15478	43.3557	1	0.245731	0.216315
GOTERM_MF_FAT	GO:0031726~CCR1 chemokine receptor binding	2	1.86916	0.0448017	CCL5, CCL4	102	7	15478	43.3557	1	0.245731	0.216315
GOTERM_MF_FAT	GO:0030971~receptor tyrosine kinase binding	3	2.80374	0.0468474	PTPN11, PLCG1, TP53	102	53	15478	8.58935	1	0.254382	0.223931
GOTERM_MF_FAT	GO:0031730~CCR5 chemokine receptor binding	2	1.86916	0.0510376	CCL5, CCL4	102	8	15478	37.9363	1	0.27439	0.241544
GOTERM_MF_FAT	GO:0035257~nuclear hormone receptor binding	4	3.73832	0.0522947	XBP1, SRC, ACTN4, HIF1A	102	129	15478	4.70527	1	0.278393	0.245068
GOTERM_MF_FAT	GO:0008528~G-protein coupled peptide receptor activity	4	3.73832	0.0552932	CXCR3, SIGMAR1, F2RL1, CCR5	102	132	15478	4.59834	1	0.287755	0.25331
GOTERM_MF_FAT	GO:0001653~peptide receptor activity	4	3.73832	0.0563107	CXCR3, SIGMAR1, F2RL1, CCR5	102	133	15478	4.56376	1	0.287755	0.25331
GOTERM_MF_FAT	GO:1990782~protein tyrosine kinase binding	3	2.80374	0.0567348	PTPN11, PLCG1, TP53	102	59	15478	7.71585	1	0.287755	0.25331
GOTERM_MF_FAT	GO:0033613~activating transcription factor binding	3	2.80374	0.0567348	JUN, RELA, NFE2L2	102	59	15478	7.71585	1	0.287755	0.25331
GOTERM_MF_FAT	GO:0070513~death domain binding	2	1.86916	0.0572331	BCL2, BAX	102	9	15478	33.7211	1	0.287755	0.25331
GOTERM_MF_FAT	GO:0051400~BH domain binding	2	1.86916	0.0572331	BCL2, BAX	102	9	15478	33.7211	1	0.287755	0.25331
GOTERM_MF_FAT	GO:0001228~transcriptional activator activity, RNA polymerase II transcription regulatory region sequence-specific binding	6	5.60748	0.0622164	JUN, HIF1A, TP53, RELA, NFKB1, NFE2L2	102	326	15478	2.79285	1	0.30994	0.272839
GOTERM_MF_FAT	GO:0046790~virion binding	2	1.86916	0.0633886	CRP, CD209	102	10	15478	30.349	1	0.312909	0.275452
GOTERM_MF_FAT	GO:0008289~lipid binding	9	8.41121	0.0647419	ALB, BAX, HMGB1, PTGS2, TLR4, CD55, IL2, HSPD1, TLR2	102	656	15478	2.08187	1	0.31671	0.278799
GOTERM_MF_FAT	GO:0043566~structure-specific DNA binding	4	3.73832	0.0669703	XBP1, ACTN4, HMGB1, RELA	102	143	15478	4.24462	1	0.323282	0.284584
GOTERM_MF_FAT	GO:0003725~double-stranded RNA binding	3	2.80374	0.0672761	HMGB1, TLR3, HSPD1	102	65	15478	7.00362	1	0.323282	0.284584
GOTERM_MF_FAT	GO:0005172~vascular endothelial growth factor receptor binding	2	1.86916	0.0695043	ITGA5, VEGFA	102	11	15478	27.59	1	0.33106	0.29143
GOTERM_MF_FAT	GO:0005057~receptor signaling protein activity	4	3.73832	0.0714749	RIPK3, PLCG1, MAPK14, EGFR	102	147	15478	4.12912	1	0.337486	0.297087
GOTERM_MF_FAT	GO:0015168~glycerol transmembrane transporter activity	2	1.86916	0.0755805	AQP5, AQP1	102	12	15478	25.2908	1	0.347798	0.306165
GOTERM_MF_FAT	GO:0016004~phospholipase activator activity	2	1.86916	0.0755805	CCL5, CASP3	102	12	15478	25.2908	1	0.347798	0.306165
GOTERM_MF_FAT	GO:0015254~glycerol channel activity	2	1.86916	0.0755805	AQP5, AQP1	102	12	15478	25.2908	1	0.347798	0.306165
GOTERM_MF_FAT	GO:0044548~S100 protein binding	2	1.86916	0.0816174	EZR, AGER	102	13	15478	23.3454	1	0.372422	0.327841
GOTERM_MF_FAT	GO:0060229~lipase activator activity	2	1.86916	0.0876152	CCL5, CASP3	102	14	15478	21.6779	1	0.396459	0.349001
GOTERM_MF_FAT	GO:0043565~sequence-specific DNA binding	12	11.215	0.0934645	XBP1, JUN, IRF3, BCL2, ACTN4, HIF1A, TP53, RELA, NFKB1, KLF2, HSPD1, NFE2L2	102	1080	15478	1.68606	1	0.409606	0.360574
GOTERM_MF_FAT	GO:0005161~platelet-derived growth factor receptor binding	2	1.86916	0.0935743	ITGA5, VEGFA	102	15	15478	20.2327	1	0.409606	0.360574
GOTERM_MF_FAT	GO:0015166~polyol transmembrane transporter activity	2	1.86916	0.0935743	AQP5, AQP1	102	15	15478	20.2327	1	0.409606	0.360574
GOTERM_MF_FAT	GO:0015665~alcohol transmembrane transporter activity	2	1.86916	0.0935743	AQP5, AQP1	102	15	15478	20.2327	1	0.409606	0.360574
GOTERM_MF_FAT	GO:0030246~carbohydrate binding	5	4.6729	0.0942924	CLEC4A, CD209, MRC1, IL2, MBL2	102	264	15478	2.87396	1	0.409606	0.360574
GOTERM_MF_FAT	GO:0000977~RNA polymerase II regulatory region sequence-specific DNA binding	8	7.47664	0.0978565	XBP1, JUN, IRF3, ACTN4, TP53, RELA, NFKB1, NFE2L2	102	601	15478	2.0199	1	0.417662	0.367666
GOTERM_MF_FAT	GO:0016307~phosphatidylinositol phosphate kinase activity	2	1.86916	0.0994948	PIK3CB, PIK3CG	102	16	15478	18.9681	1	0.417662	0.367666
GOTERM_MF_FAT	GO:0015250~water channel activity	2	1.86916	0.0994948	AQP5, AQP1	102	16	15478	18.9681	1	0.417662	0.367666
GOTERM_MF_FAT	GO:0001012~RNA polymerase II regulatory region DNA binding	8	7.47664	0.0997989	XBP1, JUN, IRF3, ACTN4, TP53, RELA, NFKB1, NFE2L2	102	604	15478	2.00987	1	0.417662	0.367666
