# Supplementary material for: Influenza A virus infects pulmonary microvascular endothelial cells leading to microvascular leakage and release of pro-inflammatory cytokines
Source: PeerJ. 2021 Aug 3;9:e11892. doi: 10.7717/peerj.11892 (PMC8344683; doi:10.7717/peerj.11892)
Supplement: Supplemental Information 7 [file peerj-09-11892-s007.xls]

## Sheet: Sheet1
Category	Term	Count	%	PValue	Genes	List Total	Pop Hits	Pop Total	Fold Enrichment	Bonferroni	Benjamini	FDR
KEGG_PATHWAY	hsa05152:Tuberculosis	26	24.2991	4.88079e-19	IFNA1, SRC, TNF, RELA, HSPD1, CASP3, MRC1, CAMP, IL10, TGFB1, NOS2, IFNB1, IFNGR1, IL18, MAPK14, RHOA, NFKB1, IL1A, IL6, IFNG, CD209, IL1B, BCL2, BAX, TLR4, TLR2	97	177	6879	10.4173	8.54138e-17	8.54138e-17	4.53914e-17
KEGG_PATHWAY	hsa05142:Chagas disease (American trypanosomiasis)	21	19.6262	4.78371e-18	IL10, JUN, TGFB1, CXCL8, NOS2, IFNB1, IFNGR1, PIK3CB, MAPK14, TNF, IL2, PIK3CG, RELA, NFKB1, IL6, IFNG, IL1B, CCL5, CCL2, TLR4, TLR2	97	104	6879	14.3199	8.37149e-16	4.15394e-16	2.20752e-16
KEGG_PATHWAY	hsa04620:Toll-like receptor signaling pathway	21	19.6262	7.12104e-18	JUN, CXCL8, IFNA1, IFNB1, PIK3CB, MAPK14, TNF, PIK3CG, RELA, NFKB1, CXCL10, CXCL11, IL6, IRF3, IL1B, CCL5, CCL4, TLR5, TLR4, TLR3, TLR2	97	106	6879	14.0497	1.24618e-15	4.15394e-16	2.20752e-16
KEGG_PATHWAY	hsa05164:Influenza A	24	22.4299	7.0577e-17	JUN, CXCL8, IFNA1, IFNB1, IFNGR1, IL18, PIK3CB, MAPK14, TNF, PIK3CG, RELA, NFKB1, ICAM1, IL1A, CXCL10, IL6, IFNG, IRF3, IL1B, CCL5, CCL2, TLR4, TLR3, HSPA1A	97	174	6879	9.78173	1.94289e-14	3.08774e-15	1.64092e-15
KEGG_PATHWAY	hsa05321:Inflammatory bowel disease (IBD)	17	15.8879	1.55753e-16	IL10, JUN, TGFB1, IFNGR1, IL18, TNF, IL2, RELA, NFKB1, IL1A, IL6, IL5, IFNG, IL1B, TLR5, TLR4, TLR2	97	64	6879	18.8375	1.94289e-14	5.45137e-15	2.89701e-15
KEGG_PATHWAY	hsa05205:Proteoglycans in cancer	24	22.4299	1.7152e-15	TGFB1, SRC, MMP2, FN1, PTPN11, PIK3CB, MAPK14, FGF2, HIF1A, TNF, MMP9, RHOA, EGFR, PIK3CG, PTK2, VEGFA, PLAU, CASP3, PLCG1, ITGA5, EZR, TP53, TLR4, TLR2	97	200	6879	8.5101	2.91434e-13	5.00265e-14	2.65855e-14
KEGG_PATHWAY	hsa05146:Amoebiasis	19	17.757	2.75e-15	IL10, TGFB1, CXCL8, CSF2, NOS2, FN1, PIK3CB, ACTN4, TNF, PIK3CG, RELA, PTK2, NFKB1, IL6, IFNG, IL1B, CASP3, TLR4, TLR2	97	106	6879	12.7116	4.85723e-13	6.87499e-14	3.65357e-14
KEGG_PATHWAY	hsa05161:Hepatitis B	21	19.6262	4.47106e-15	JUN, TGFB1, CXCL8, IFNA1, IFNB1, SRC, PIK3CB, TNF, MMP9, PIK3CG, RELA, NFKB1, IL6, IRF3, CASP3, BCL2, BAX, TP53, TLR4, TLR3, TLR2	97	145	6879	10.2708	7.77156e-13	9.78045e-14	5.19761e-14
KEGG_PATHWAY	hsa05162:Measles	20	18.6916	1.20126e-14	IFNA1, IFNB1, IFNGR1, PIK3CB, IL2, PIK3CG, RELA, NFKB1, IL1A, IL6, IFNG, IRF3, CD209, IL1B, IL2RA, FYN, TP53, TLR4, HSPA1A, TLR2	97	133	6879	10.6643	2.09832e-12	2.21103e-13	1.175e-13
KEGG_PATHWAY	hsa04060:Cytokine-cytokine receptor interaction	25	23.3645	1.26344e-14	CSF2, CXCL8, IFNA1, TNF, CCL5, CXCR3, CCL4, CCL2, CCR5, IL10, TGFB1, IFNB1, IFNGR1, IL18, IL2, IL1A, IL3, CXCL10, CXCL11, IL6, IL5, IFNG, IL1B, IL2RA, IL9	97	243	6879	7.29604	2.21489e-12	2.21103e-13	1.175e-13
KEGG_PATHWAY	hsa05133:Pertussis	16	14.9533	5.54304e-14	IL10, JUN, CXCL8, NOS2, MAPK14, TNF, RHOA, RELA, NFKB1, IL1A, IL6, IRF3, IL1B, CASP3, ITGA5, TLR4	97	75	6879	15.1291	9.69502e-12	8.23648e-13	4.3771e-13
KEGG_PATHWAY	hsa04668:TNF signaling pathway	18	16.8224	5.64787e-14	JUN, CSF2, RIPK3, PIK3CB, PTGS2, MAPK14, TNF, MMP9, PIK3CG, RELA, NFKB1, ICAM1, CXCL10, IL6, IL1B, CASP3, CCL5, CCL2	97	107	6879	11.9301	9.88931e-12	8.23648e-13	4.3771e-13
KEGG_PATHWAY	hsa05132:Salmonella infection	16	14.9533	2.70662e-13	JUN, CXCL8, CSF2, NOS2, IFNGR1, IL18, MAPK14, RELA, NFKB1, IL1A, IL6, IFNG, IL1B, CCL4, TLR5, TLR4	97	83	6879	13.6708	4.73677e-11	3.64352e-12	1.93627e-12
KEGG_PATHWAY	hsa05140:Leishmaniasis	15	14.0187	5.04769e-13	IL10, JUN, TGFB1, NOS2, IFNGR1, PTGS2, MAPK14, TNF, RELA, NFKB1, IL1A, IFNG, IL1B, TLR4, TLR2	97	71	6879	14.9826	8.83432e-11	6.30962e-12	3.35311e-12
KEGG_PATHWAY	hsa05323:Rheumatoid arthritis	16	14.9533	6.67665e-13	JUN, TGFB1, CXCL8, CSF2, IL18, TNF, ICAM1, VEGFA, IL1A, IL6, IFNG, IL1B, CCL5, CCL2, TLR4, TLR2	97	88	6879	12.8941	1.16845e-10	7.78943e-12	4.13953e-12
KEGG_PATHWAY	hsa05134:Legionellosis	13	12.1495	5.72462e-12	CXCL8, IL18, TNF, RELA, NFKB1, HSPD1, IL6, IL1B, CASP3, TLR5, TLR4, HSPA1A, TLR2	97	54	6879	17.0727	1.00181e-09	6.2613e-11	3.32743e-11
KEGG_PATHWAY	hsa04066:HIF-1 signaling pathway	15	14.0187	3.78493e-11	NOS2, IFNGR1, PIK3CB, HIF1A, EGFR, PIK3CG, RELA, NFKB1, INS, VEGFA, IL6, IFNG, BCL2, PLCG1, TLR4	97	96	6879	11.0809	6.62362e-09	3.89625e-10	2.07058e-10
KEGG_PATHWAY	hsa05144:Malaria	12	11.215	4.10405e-11	IL10, IL6, TGFB1, CXCL8, IFNG, IL1B, IL18, CCL2, TNF, TLR4, ICAM1, TLR2	97	49	6879	17.3676	7.18209e-09	3.99004e-10	2.12042e-10
KEGG_PATHWAY	hsa04660:T cell receptor signaling pathway	15	14.0187	6.68042e-11	IL10, JUN, CSF2, PIK3CB, MAPK14, TNF, RHOA, IL2, PIK3CG, RELA, NFKB1, IL5, IFNG, FYN, PLCG1	97	100	6879	10.6376	1.16907e-08	6.15302e-10	3.26989e-10
KEGG_PATHWAY	hsa05145:Toxoplasmosis	15	14.0187	2.4808e-10	IL10, TGFB1, NOS2, IFNGR1, MAPK14, TNF, RELA, NFKB1, IFNG, CASP3, BCL2, CCR5, TLR4, HSPA1A, TLR2	97	110	6879	9.67057	4.3414e-08	2.1707e-09	1.15357e-09
KEGG_PATHWAY	hsa05168:Herpes simplex infection	18	16.8224	3.96479e-10	JUN, IFNA1, IFNB1, IFNGR1, PTPN11, TNF, RELA, NFKB1, IL6, IFNG, IRF3, IL1B, CASP3, CCL5, CCL2, TP53, TLR3, TLR2	97	183	6879	6.97549	6.93837e-08	3.30399e-09	1.75583e-09
KEGG_PATHWAY	hsa04623:Cytosolic DNA-sensing pathway	12	11.215	8.82312e-10	CXCL10, IL6, RIPK3, IRF3, IFNA1, IFNB1, CCL5, IL1B, CCL4, IL18, RELA, NFKB1	97	64	6879	13.297	1.54405e-07	7.01839e-09	3.72977e-09
KEGG_PATHWAY	hsa05200:Pathways in cancer	24	22.4299	2.43633e-09	JUN, TGFB1, CXCL8, NOS2, MMP2, FN1, PIK3CB, PTGS2, FGF2, HIF1A, MMP9, RHOA, EGFR, PIK3CG, RELA, PTK2, NFKB1, VEGFA, IL6, CASP3, BCL2, BAX, PLCG1, TP53	97	393	6879	4.33084	4.26358e-07	1.85373e-08	9.85125e-09
KEGG_PATHWAY	hsa04630:Jak-STAT signaling pathway	15	14.0187	9.90297e-09	IL10, CSF2, IFNA1, IFNB1, IFNGR1, PTPN11, PIK3CB, IL2, PIK3CG, IL3, IL6, IL5, IFNG, IL2RA, IL9	97	145	6879	7.3363	1.73302e-06	7.20281e-08	3.82778e-08
KEGG_PATHWAY	hsa04210:Apoptosis	11	10.2804	1.02897e-08	IL3, AIFM1, CASP3, BCL2, BAX, PIK3CB, TNF, TP53, RELA, NFKB1, PIK3CG	97	62	6879	12.5821	1.8007e-06	7.20281e-08	3.82778e-08
KEGG_PATHWAY	hsa04932:Non-alcoholic fatty liver disease (NAFLD)	15	14.0187	1.67609e-08	XBP1, JUN, TGFB1, CXCL8, PIK3CB, TNF, PIK3CG, RELA, NFKB1, INS, IL1A, IL6, IL1B, CASP3, BAX	97	151	6879	7.04479	2.93315e-06	1.12813e-07	5.99523e-08
KEGG_PATHWAY	hsa05120:Epithelial cell signaling in Helicobacter pylori infection	11	10.2804	2.2411e-08	JUN, CXCL8, SRC, CCL5, CASP3, PTPN11, PLCG1, MAPK14, RELA, EGFR, NFKB1	97	67	6879	11.6432	3.92191e-06	1.45256e-07	7.71934e-08
KEGG_PATHWAY	hsa04380:Osteoclast differentiation	14	13.0841	2.50819e-08	JUN, TGFB1, IFNB1, IFNGR1, PIK3CB, MAPK14, TNF, PIK3CG, RELA, NFKB1, IL1A, IFNG, IL1B, FYN	97	131	6879	7.57897	4.38932e-06	1.54111e-07	8.18992e-08
KEGG_PATHWAY	hsa04064:NF-kappa B signaling pathway	12	11.215	2.55385e-08	CXCL8, PLAU, IL1B, CCL4, BCL2, PLCG1, PTGS2, TNF, TLR4, RELA, NFKB1, ICAM1	97	87	6879	9.78173	4.46922e-06	1.54111e-07	8.18992e-08
KEGG_PATHWAY	hsa04062:Chemokine signaling pathway	16	14.9533	3.30196e-08	CXCL8, SRC, PRKCD, PIK3CB, RHOA, PIK3CG, RELA, PTK2, NFKB1, CXCL10, CXCL11, CCL5, CXCR3, CCL4, CCL2, CCR5	97	186	6879	6.10043	5.77842e-06	1.92614e-07	1.02361e-07
KEGG_PATHWAY	hsa04151:PI3K-Akt signaling pathway	21	19.6262	3.83431e-08	IFNA1, IFNB1, FN1, PIK3CB, FGF2, EGFR, IL2, PIK3CG, RELA, PTK2, NFKB1, INS, VEGFA, IL3, IL6, IL2RA, BCL2, ITGA5, TP53, TLR4, TLR2	97	345	6879	4.31672	6.71002e-06	2.16453e-07	1.15029e-07
KEGG_PATHWAY	hsa04621:NOD-like receptor signaling pathway	10	9.34579	6.06028e-08	IL6, CXCL8, CCL5, IL1B, IL18, CCL2, MAPK14, TNF, RELA, NFKB1	97	56	6879	12.6638	1.06054e-05	3.31421e-07	1.76127e-07
KEGG_PATHWAY	hsa04722:Neurotrophin signaling pathway	13	12.1495	8.2867e-08	JUN, PRKCD, PTPN11, PIK3CB, MAPK14, RHOA, PIK3CG, RELA, NFKB1, BCL2, BAX, PLCG1, TP53	97	120	6879	7.68273	1.45016e-05	4.39446e-07	2.33534e-07
KEGG_PATHWAY	hsa04650:Natural killer cell mediated cytotoxicity	13	12.1495	9.97193e-08	CSF2, IFNA1, IFNB1, IFNGR1, PTPN11, PIK3CB, TNF, PIK3CG, ICAM1, IFNG, CASP3, FYN, PLCG1	97	122	6879	7.55679	1.74507e-05	5.13261e-07	2.72762e-07
KEGG_PATHWAY	hsa05160:Hepatitis C	13	12.1495	2.59862e-07	CXCL8, IFNA1, IFNB1, PIK3CB, MAPK14, TNF, EGFR, PIK3CG, RELA, NFKB1, IRF3, TP53, TLR3	97	133	6879	6.93179	4.54748e-05	1.27673e-06	6.78491e-07
KEGG_PATHWAY	hsa05143:African trypanosomiasis	8	7.47664	2.62642e-07	IL10, IL6, IFNG, IL1B, IL18, F2RL1, TNF, ICAM1	97	33	6879	17.1921	4.59613e-05	1.27673e-06	6.78491e-07
KEGG_PATHWAY	hsa04622:RIG-I-like receptor signaling pathway	10	9.34579	4.43061e-07	CXCL10, CXCL8, IRF3, IFNA1, IFNB1, ISG15, MAPK14, TNF, RELA, NFKB1	97	70	6879	10.1311	7.75326e-05	2.09556e-06	1.11364e-06
KEGG_PATHWAY	hsa04670:Leukocyte transendothelial migration	12	11.215	4.70772e-07	MMP2, PTPN11, ACTN4, PLCG1, PIK3CB, EZR, MAPK14, MMP9, PTK2, RHOA, PIK3CG, ICAM1	97	115	6879	7.40009	8.23818e-05	2.16803e-06	1.15215e-06
KEGG_PATHWAY	hsa04071:Sphingolipid signaling pathway	12	11.215	7.25169e-07	SGPL1, BCL2, BAX, FYN, PIK3CB, MAPK14, TNF, TP53, RELA, RHOA, NFKB1, PIK3CG	97	120	6879	7.09175	0.000126897	3.25396e-06	1.72925e-06
KEGG_PATHWAY	hsa05210:Colorectal cancer	9	8.41121	1.95124e-06	JUN, TGFB1, CASP3, BCL2, BAX, PIK3CB, TP53, RHOA, PIK3CG	97	62	6879	10.2945	0.000341409	8.53667e-06	4.53663e-06
KEGG_PATHWAY	hsa05222:Small cell lung cancer	10	9.34579	2.36174e-06	NOS2, BCL2, FN1, PIK3CB, PTGS2, TP53, RELA, PTK2, NFKB1, PIK3CG	97	85	6879	8.34324	0.00041322	1.00806e-05	5.35712e-06
KEGG_PATHWAY	hsa04640:Hematopoietic cell lineage	10	9.34579	2.87544e-06	IL1A, IL3, IL6, CSF2, IL5, IL1B, IL2RA, ITGA5, TNF, CD55	97	87	6879	8.15144	0.000503075	1.1981e-05	6.36703e-06
KEGG_PATHWAY	hsa04664:Fc epsilon RI signaling pathway	9	8.41121	3.98308e-06	IL3, CSF2, IL5, FYN, PLCG1, PIK3CB, MAPK14, TNF, PIK3CG	97	68	6879	9.38614	0.000696797	1.62102e-05	8.61456e-06
KEGG_PATHWAY	hsa05020:Prion diseases	7	6.54206	6.19265e-06	IL1A, IL6, CCL5, IL1B, BAX, FYN, SOD1	97	34	6879	14.6007	0.00108313	2.46299e-05	1.3089e-05
KEGG_PATHWAY	hsa05206:MicroRNAs in cancer	16	14.9533	8.29413e-06	ABCB1, MIR146A, PTGS2, MMP9, RHOA, EGFR, NFKB1, VEGFA, MIR155, PLAU, CASP3, BCL2, PLCG1, ITGA5, EZR, TP53	97	286	6879	3.96741	0.00145043	3.22549e-05	1.71412e-05
KEGG_PATHWAY	hsa05166:HTLV-I infection	15	14.0187	9.74578e-06	XBP1, JUN, TGFB1, CSF2, PIK3CB, TNF, IL2, PIK3CG, RELA, NFKB1, ICAM1, IL6, IL2RA, BAX, TP53	97	254	6879	4.18804	0.00170407	3.70763e-05	1.97034e-05
KEGG_PATHWAY	hsa04931:Insulin resistance	10	9.34579	1.72349e-05	PTPA, IL6, PRKCD, PTPN11, PIK3CB, TNF, RELA, NFKB1, PIK3CG, INS	97	108	6879	6.56644	0.00301159	6.41726e-05	3.41031e-05
KEGG_PATHWAY	hsa05219:Bladder cancer	7	6.54206	1.91365e-05	CXCL8, SRC, MMP2, TP53, MMP9, EGFR, VEGFA	97	41	6879	12.1079	0.00334331	6.96753e-05	3.70274e-05
KEGG_PATHWAY	hsa04370:VEGF signaling pathway	8	7.47664	1.95091e-05	SRC, PLCG1, PIK3CB, MAPK14, PTGS2, PTK2, PIK3CG, VEGFA	97	61	6879	9.30066	0.0034083	6.96753e-05	3.70274e-05
KEGG_PATHWAY	hsa04940:Type I diabetes mellitus	7	6.54206	2.20764e-05	IL1A, IFNG, IL1B, TNF, IL2, HSPD1, INS	97	42	6879	11.8196	0.00385595	7.72672e-05	4.1062e-05
KEGG_PATHWAY	hsa05203:Viral carcinogenesis	13	12.1495	2.45925e-05	JUN, SRC, PIK3CB, ACTN4, RHOA, PIK3CG, RELA, NFKB1, IRF3, CASP3, BAX, CCR5, TP53	97	205	6879	4.49721	0.00429449	8.4386e-05	4.48451e-05
KEGG_PATHWAY	hsa04510:Focal adhesion	13	12.1495	2.58157e-05	JUN, SRC, FN1, PIK3CB, ACTN4, RHOA, EGFR, PIK3CG, PTK2, VEGFA, BCL2, FYN, ITGA5	97	206	6879	4.47538	0.00450762	8.68798e-05	4.61704e-05
KEGG_PATHWAY	hsa05212:Pancreatic cancer	8	7.47664	2.97497e-05	TGFB1, PIK3CB, TP53, RELA, EGFR, NFKB1, PIK3CG, VEGFA	97	65	6879	8.72831	0.00519275	9.82302e-05	5.22024e-05
KEGG_PATHWAY	hsa04810:Regulation of actin cytoskeleton	13	12.1495	3.12554e-05	SRC, FN1, PIK3CB, ACTN4, F2, FGF2, RHOA, EGFR, PIK3CG, PTK2, INS, ITGA5, EZR	97	210	6879	4.39013	0.00545484	0.000101291	5.38287e-05
KEGG_PATHWAY	hsa05169:Epstein-Barr virus infection	10	9.34579	4.57732e-05	JUN, IRF3, BCL2, PIK3CB, MAPK14, TP53, RELA, NFKB1, PIK3CG, ICAM1	97	122	6879	5.81291	0.00797849	0.000145642	7.73983e-05
KEGG_PATHWAY	hsa05014:Amyotrophic lateral sclerosis (ALS)	7	6.54206	6.1127e-05	CASP3, BCL2, BAX, MAPK14, TNF, TP53, SOD1	97	50	6879	9.92845	0.0106405	0.000191022	0.000101514
KEGG_PATHWAY	hsa04915:Estrogen signaling pathway	9	8.41121	6.47324e-05	JUN, SRC, MMP2, PRKCD, PIK3CB, MMP9, EGFR, PIK3CG, HSPA1A	97	99	6879	6.44705	0.0112646	0.00019874	0.000105616
KEGG_PATHWAY	hsa05332:Graft-versus-host disease	6	5.60748	8.30302e-05	IL1A, IL6, IFNG, IL1B, TNF, IL2	97	33	6879	12.8941	0.0144258	0.000250522	0.000133135
KEGG_PATHWAY	hsa04068:FoxO signaling pathway	10	9.34579	9.541e-05	IL10, IL6, TGFB1, PIK3CB, MAPK14, SOD2, EGFR, KLF2, PIK3CG, INS	97	134	6879	5.29235	0.0165589	0.000282996	0.000150392
KEGG_PATHWAY	hsa05202:Transcriptional misregulation in cancer	11	10.2804	0.000101302	IL3, IL6, CXCL8, CSF2, PLAU, TP53, MMP9, RELA, PTK2, NFKB1, ELANE	97	167	6879	4.67121	0.0175725	0.000295464	0.000157018
KEGG_PATHWAY	hsa04010:MAPK signaling pathway	13	12.1495	0.000188471	JUN, TGFB1, MAPK14, FGF2, TNF, EGFR, RELA, NFKB1, IL1A, IL1B, CASP3, TP53, HSPA1A	97	253	6879	3.64398	0.0324475	0.000540696	0.000287341
KEGG_PATHWAY	hsa05215:Prostate cancer	8	7.47664	0.000208988	BCL2, PIK3CB, TP53, RELA, EGFR, NFKB1, PIK3CG, INS	97	88	6879	6.44705	0.0359159	0.000589885	0.000313482
KEGG_PATHWAY	hsa05211:Renal cell carcinoma	7	6.54206	0.000292102	JUN, TGFB1, PTPN11, PIK3CB, HIF1A, PIK3CG, VEGFA	97	66	6879	7.52156	0.0498405	0.000811396	0.000431199
KEGG_PATHWAY	hsa04750:Inflammatory mediator regulation of TRP channels	8	7.47664	0.000406666	SRC, IL1B, PRKCD, F2RL1, PLCG1, PIK3CB, MAPK14, PIK3CG	97	98	6879	5.78919	0.0687067	0.00111198	0.000590937
KEGG_PATHWAY	hsa04917:Prolactin signaling pathway	7	6.54206	0.000435368	SRC, PIK3CB, MAPK14, RELA, NFKB1, PIK3CG, INS	97	71	6879	6.99187	0.0733747	0.00117214	0.000622911
KEGG_PATHWAY	hsa05220:Chronic myeloid leukemia	7	6.54206	0.000469661	TGFB1, PTPN11, PIK3CB, TP53, RELA, NFKB1, PIK3CG	97	72	6879	6.89476	0.0789215	0.00124531	0.000661795
KEGG_PATHWAY	hsa05100:Bacterial invasion of epithelial cells	7	6.54206	0.000721992	SRC, FN1, PIK3CB, ITGA5, PTK2, RHOA, PIK3CG	97	78	6879	6.36439	0.118733	0.0018858	0.00100217
KEGG_PATHWAY	hsa05310:Asthma	5	4.6729	0.000739093	IL10, IL3, IL5, IL9, TNF	97	30	6879	11.8196	0.121368	0.00190208	0.00101082
KEGG_PATHWAY	hsa04014:Ras signaling pathway	11	10.2804	0.00114007	PTPN11, PLCG1, PIK3CB, FGF2, RELA, RHOA, EGFR, NFKB1, PIK3CG, INS, VEGFA	97	226	6879	3.45174	0.180963	0.00289147	0.00153661
KEGG_PATHWAY	hsa04012:ErbB signaling pathway	7	6.54206	0.00128369	JUN, SRC, PLCG1, PIK3CB, PTK2, EGFR, PIK3CG	97	87	6879	5.70601	0.201316	0.00320922	0.00170547
KEGG_PATHWAY	hsa05330:Allograft rejection	5	4.6729	0.00165318	IL10, IL5, IFNG, TNF, IL2	97	37	6879	9.58345	0.251397	0.00407475	0.00216544
KEGG_PATHWAY	hsa05131:Shigellosis	6	5.60748	0.00189723	CXCL8, SRC, ITGA5, MAPK14, RELA, NFKB1	97	64	6879	6.64852	0.28275	0.00461132	0.00245059
KEGG_PATHWAY	hsa04015:Rap1 signaling pathway	10	9.34579	0.00252082	SRC, PLCG1, PIK3CB, MAPK14, FGF2, RHOA, EGFR, PIK3CG, INS, VEGFA	97	210	6879	3.37703	0.357058	0.00604306	0.00321146
KEGG_PATHWAY	hsa04520:Adherens junction	6	5.60748	0.00300096	PTPRB, SRC, FYN, ACTN4, RHOA, EGFR	97	71	6879	5.99303	0.409011	0.00709686	0.00377148
KEGG_PATHWAY	hsa04672:Intestinal immune network for IgA production	5	4.6729	0.00401487	IL10, IL6, TGFB1, IL5, IL2	97	47	6879	7.54442	0.505405	0.00936802	0.00497844
KEGG_PATHWAY	hsa04930:Type II diabetes mellitus	5	4.6729	0.00433369	PRKCD, PIK3CB, TNF, PIK3CG, INS	97	48	6879	7.38724	0.532354	0.00997889	0.00530307
KEGG_PATHWAY	hsa05130:Pathogenic Escherichia coli infection	5	4.6729	0.00539176	FYN, EZR, TLR5, TLR4, RHOA	97	51	6879	6.9527	0.611752	0.012254	0.00651213
KEGG_PATHWAY	hsa05223:Non-small cell lung cancer	5	4.6729	0.00751655	PLCG1, PIK3CB, TP53, EGFR, PIK3CG	97	56	6879	6.33192	0.732962	0.016864	0.00896204
KEGG_PATHWAY	hsa04912:GnRH signaling pathway	6	5.60748	0.0086193	JUN, SRC, MMP2, PRKCD, MAPK14, EGFR	97	91	6879	4.67588	0.780173	0.0190934	0.0101468
KEGG_PATHWAY	hsa05230:Central carbon metabolism in cancer	5	4.6729	0.0119512	PIK3CB, HIF1A, TP53, EGFR, PIK3CG	97	64	6879	5.54043	0.878039	0.0261431	0.0138932
KEGG_PATHWAY	hsa05214:Glioma	5	4.6729	0.0126015	PLCG1, PIK3CB, TP53, EGFR, PIK3CG	97	65	6879	5.45519	0.891313	0.0272255	0.0144684
KEGG_PATHWAY	hsa05231:Choline metabolism in cancer	6	5.60748	0.0131708	JUN, PLCG1, PIK3CB, HIF1A, EGFR, PIK3CG	97	101	6879	4.21292	0.901747	0.0281084	0.0149376
KEGG_PATHWAY	hsa04610:Complement and coagulation cascades	5	4.6729	0.0154281	PLAU, F2, KNG1, CD55, MBL2	97	69	6879	5.13895	0.934189	0.0321419	0.0170811
KEGG_PATHWAY	hsa04662:B cell receptor signaling pathway	5	4.6729	0.0154281	JUN, PIK3CB, RELA, NFKB1, PIK3CG	97	69	6879	5.13895	0.934189	0.0321419	0.0170811
KEGG_PATHWAY	hsa05218:Melanoma	5	4.6729	0.0169798	PIK3CB, TP53, FGF2, EGFR, PIK3CG	97	71	6879	4.99419	0.950062	0.0349584	0.0185779
KEGG_PATHWAY	hsa04919:Thyroid hormone signaling pathway	6	5.60748	0.0219343	SRC, PLCG1, PIK3CB, HIF1A, TP53, PIK3CG	97	115	6879	3.70004	0.979374	0.0446337	0.0237196
KEGG_PATHWAY	hsa04611:Platelet activation	6	5.60748	0.0348085	SRC, FYN, PIK3CB, MAPK14, RHOA, PIK3CG	97	130	6879	3.27312	0.997971	0.0699734	0.0371859
KEGG_PATHWAY	hsa05213:Endometrial cancer	4	3.73832	0.0355865	PIK3CB, TP53, EGFR, PIK3CG	97	52	6879	5.45519	0.998238	0.0699734	0.0371859
KEGG_PATHWAY	hsa05320:Autoimmune thyroid disease	4	3.73832	0.0355865	IL10, IL5, IFNA1, IL2	97	52	6879	5.45519	0.998238	0.0699734	0.0371859
KEGG_PATHWAY	hsa05221:Acute myeloid leukemia	4	3.73832	0.0429069	PIK3CB, RELA, NFKB1, PIK3CG	97	56	6879	5.06554	0.999536	0.0825133	0.0438499
KEGG_PATHWAY	hsa04923:Regulation of lipolysis in adipocytes	4	3.73832	0.0429069	PIK3CB, PTGS2, PIK3CG, INS	97	56	6879	5.06554	0.999536	0.0825133	0.0438499
KEGG_PATHWAY	hsa05416:Viral myocarditis	4	3.73832	0.0448463	CASP3, FYN, CD55, ICAM1	97	57	6879	4.97667	0.999674	0.0853054	0.0453337
KEGG_PATHWAY	hsa04150:mTOR signaling pathway	4	3.73832	0.0468287	PIK3CB, TNF, PIK3CG, INS	97	58	6879	4.89086	0.999774	0.0881186	0.0468287
KEGG_PATHWAY	hsa04024:cAMP signaling pathway	7	6.54206	0.0578662	JUN, GHRL, PIK3CB, RELA, RHOA, NFKB1, PIK3CG	97	198	6879	2.50719	0.999971	0.106986	0.0578662
KEGG_PATHWAY	hsa04145:Phagosome	6	5.60748	0.0580783	CD209, MRC1, ITGA5, TLR4, MBL2, TLR2	97	150	6879	2.8367	0.999972	0.106986	0.0580783
KEGG_PATHWAY	hsa04920:Adipocytokine signaling pathway	4	3.73832	0.0738519	PTPN11, TNF, RELA, NFKB1	97	70	6879	4.05243	0.999999	0.134626	0.0738519
KEGG_PATHWAY	hsa04141:Protein processing in endoplasmic reticulum	6	5.60748	0.0868186	XBP1, BCL2, BAX, CRYAA, HSPA1A, NFE2L2	97	169	6879	2.51778	1	0.156632	0.0868186
KEGG_PATHWAY	hsa04612:Antigen processing and presentation	4	3.73832	0.0894584	IFNG, TNF, B2M, HSPA1A	97	76	6879	3.7325	1	0.159747	0.0894584
KEGG_PATHWAY	hsa05410:Hypertrophic cardiomyopathy (HCM)	4	3.73832	0.0949455	IL6, TGFB1, ITGA5, TNF	97	78	6879	3.6368	1	0.167833	0.0949455
