# Supplementary material for: Influenza A virus infects pulmonary microvascular endothelial cells leading to microvascular leakage and release of pro-inflammatory cytokines
Source: PeerJ. 2021 Aug 3;9:e11892. doi: 10.7717/peerj.11892 (PMC8344683; doi:10.7717/peerj.11892)
Supplement: Supplemental Information 8 [file peerj-09-11892-s008.xlsx]

## Sheet: Sheet1
Category	Term	Count	PValue	Genes
GOTERM_BP_FAT	GO:0006952~defense response	70	9.63146e-47	IFITM3, APP, CXCL8, IFNA1, HMGB1
GOTERM_BP_FAT	GO:0009605~response to external stimulus	77	2.48125e-46	IFITM3, APP, CSF2, CXCL8, IFNA1
GOTERM_BP_FAT	GO:0006955~immune response	68	1.47837e-43	IFITM3, APP, CSF2, CXCL8, IFNA1
GOTERM_BP_FAT	GO:0002684~positive regulation of immune system process	58	3.33024e-43	CXCL8, PIK3CB, HMGB1, TNF, ICAM1
GOTERM_BP_FAT	GO:0002682~regulation of immune system process	65	5.13896e-43	CXCL8, IFNA1, PIK3CB, HMGB1, TNF
GOTERM_CC_FAT	GO:0005615~extracellular space	51	1.20334e-23	APP, CSF2, CXCL8, IFNA1, HMGB1
GOTERM_CC_FAT	GO:0044421~extracellular region part	68	4.00525e-16	IFITM3, APP, CSF2, CXCL8, IFNA1
GOTERM_CC_FAT	GO:0005576~extracellular region	70	2.21568e-13	IFITM3, APP, CSF2, CXCL8, IFNA1
GOTERM_CC_FAT	GO:0009986~cell surface	28	2.04977e-12	APP, ABCB1, HMGB1, TNF, EGFR
GOTERM_CC_FAT	GO:0031983~vesicle lumen	11	3.72897e-09	APP, TGFB1, ALB, FN1, GHRL, ACTN4
GOTERM_MF_FAT	GO:0005102~receptor binding	56	2.8111e-30	APP, CSF2, CXCL8, IFNA1, HMGB1
GOTERM_MF_FAT	GO:0005125~cytokine activity	25	6.22897e-23	CSF2, CXCL8, IFNA1, HMGB1, FGF2
GOTERM_MF_FAT	GO:0005126~cytokine receptor binding	26	4.47049e-22	CSF2, CXCL8, IFNA1, TNF, CASP3
GOTERM_MF_FAT	GO:0070851~growth factor receptor binding	16	4.0345e-15	IL10, APP, CSF2, SRC, FGF2
GOTERM_MF_FAT	GO:0042802~identical protein binding	34	1.11124e-11	APP, CALCA, PTGS2, TNF, AGER
KEGG_PATHWAY	hsa05152:Tuberculosis	26	4.88079e-19	IFNA1, SRC, TNF, RELA, HSPD1
KEGG_PATHWAY	hsa05142:Chagas disease (American trypanosomiasis)	21	4.78371e-18	IL10, JUN, TGFB1, CXCL8, NOS2
KEGG_PATHWAY	hsa04620:Toll-like receptor signaling pathway	21	7.12104e-18	JUN, CXCL8, IFNA1, IFNB1, PIK3CB,
KEGG_PATHWAY	hsa05164:Influenza A	24	7.0577e-17	JUN, CXCL8, IFNA1, IFNB1, IFNGR1
KEGG_PATHWAY	hsa05321:Inflammatory bowel disease (IBD)	17	1.55753e-16	IL10, JUN, TGFB1, IFNGR1, IL18
