# Supplementary material for: Influenza A virus infects pulmonary microvascular endothelial cells leading to microvascular leakage and release of pro-inflammatory cytokines
Source: PeerJ. 2021 Aug 3;9:e11892. doi: 10.7717/peerj.11892 (PMC8344683; doi:10.7717/peerj.11892)
Supplement: Supplemental Information 12 [file peerj-09-11892-s012.xlsx]

## Sheet: 0
	Data Set	Target	Sample	Ctrl	Relative Quantity	Relative Quantity SD	Corrected Relative Quantity SD	Relative Quantity SEM	Corrected Relative Quantity SEM	Unscaled Expression	Unscaled Expression SD	Corrected Unscaled Expression SD	Unscaled Expression SEM	Corrected Unscaled Expression SEM	Expression	Expression SD	Corrected Expression SD	Expression SEM	Corrected Expression SEM	Wells	Mean Cq	Cq SD	Cq SEM
	1-SYBR	GAPDH	48h-control-GAPDH		1	0.119323	0.119323	0.0688914	0.0688914											3	34.3157	0.172147	0.0993892
	1-SYBR	GAPDH	48h-virus-GAPDH		0.775238	0.143311	0.143311	0.0827409	0.0827409											3	34.6829	0.266698	0.153978
	1-SYBR	IL1-b	48h-control-IL-1b		0	0	0													0		0
	1-SYBR	IL-1b	48h-virus-IL-1b		1	0	0	0	0	1.28993	0.238457	0.238457	0.238457	0.238457	1.28993	0.238457	0.238457	0.238457	0.238457	1	45.2695	0	0
	1-SYBR
	1-SYBR
	1-SYBR
	1-SYBR
	1-SYBR
	1-SYBR
	1-SYBR
	1-SYBR
	1-SYBR
	1-SYBR
	1-SYBR
	1-SYBR

## Sheet: Run Information
File Name	admin_2020-11-06 13-43-03_BR003947.pcrd
Created By User	admin
Notes
ID
Run Started	11/06/2020 05:43:10 UTC
Run Ended	11/06/2020 07:05:05 UTC
Sample Vol	20
Lid Temp	105
Protocol File Name	Bio-Rad Mix 专用程序60度 35X.prcl
Plate Setup File Name	Quick Plate_96 wells_SYBR Only.pltd
Base Serial Number	BR003947
Optical Head Serial Number	788BR03841
CFX Manager Version	3.1.1517.0823.
