# Supplementary material for: Influenza A virus infects pulmonary microvascular endothelial cells leading to microvascular leakage and release of pro-inflammatory cytokines
Source: PeerJ. 2021 Aug 3;9:e11892. doi: 10.7717/peerj.11892 (PMC8344683; doi:10.7717/peerj.11892)
Supplement: Supplemental Information 13 [file peerj-09-11892-s013.xlsx]

## Sheet: Sheet1
	virus				mock	mock	mock
Baseline	174	174	179		112	113	110
0h	174	171	179
2h	147	153	155
4h	152	150	151
6h	144	147	143
8h	138	137	135
10h	141	141	138
12h	136	138	136
14h	134	146	132
16h	131	132	129
20h	132	134	135
22h	132	128	130
24h	125	129	128
48h	127	129	132
