# Supplementary material for: Influenza A virus infects pulmonary microvascular endothelial cells leading to microvascular leakage and release of pro-inflammatory cytokines
Source: PeerJ. 2021 Aug 3;9:e11892. doi: 10.7717/peerj.11892 (PMC8344683; doi:10.7717/peerj.11892)
Supplement: Supplemental Information 15 [file peerj-09-11892-s015.xlsx]

## Sheet: Sheet1
	1	2	3	4	5	6	7	8	9	10
NP	0	18007.3	16010.4	8125.96	2788.84	0	0	0	0	0
GAPDH	11092.4	10180.5	12425	9218.11	14712.6	11683.2	7428.48	6716.31	9561.94	11413.9
NP/GAPDH	0	1.77	1.29	0.88	0.19	0	0	0	0	0
	1	2	3	4	5	6	7	8	9	10
NP	0	23944.3	20317.8	13716.2	1921.06	0	0	0	0	0
GAPDH	10033.9	9559.65	11092.4	10180.5	12425	9218.11	14712.6	11683.2	10053.4	10811.5
NP/GAPDH	0	2.5	1.83	1.35	0.15	0	0	0	0	0
	1	2	3	4	5	6	7	8	9	10
NP	0	14867.6	11268	4927.67	607.92	0	0	0	0	0
GAPDH	11056.1	8861.01	13913.8	8925.72	8602.01	6620.89	7942.13	10508	11172.6	8308.43
NP/GAPDH	0	1.68	0.81	0.55	0.07	0	0	0	0	0
